# Supplementary material for: Dynamics of Age- versus Therapy-Related Clonal Hematopoiesis in Long-term Survivors of Pediatric Cancer
Source: Oxford University Press journal article supplement (doi:10.1158/2159-8290.cd-22-0956), 2023-02-08
Supplement: cd-22-0956_tables_s2_s7_s8_s9_suppst1.xlsx [file cd-22-0956_tables_s2_s7_s8_s9_suppst1.xlsx]

## Sheet: TableS2
Sample	IsControl	Gene	AminoAcidChange	CHROM	GRCh37_POS	REF	ALT	Method	VAF	Subtype
SJALL003606_G1	FALSE	NF1	R1947*	17	29661945	C	T	Inference	0.00145773	iTR		Legend
SJALL003802_G1	FALSE	RAD21	R65*	8	117875450	G	A	ddPCR	0.00157119	iAR		Sample		Sample ID
SJALL003843_G1	FALSE	BCOR	R810*	X	39932171	G	A	ddPCR	0.00154572	iAR		IsControl		True if the sample is control
SJALL004210_G2	FALSE	GNAS	R201H	20	57484421	G	A	ddPCR	0.00241643	iAR		Gene		Gene symbol
SJALL004706_G1	FALSE	TP53	L130R	17	7578541	A	C	ddPCR	0.00315209	iAR		AminoAcidChange		Amino acid change annotated by Annovar
SJALL005303_G1	FALSE	TP53	C238S	17	7577568	C	G	ddPCR	0.0175962	iAR		CHROM		chromosome name
SJALL005359_G1	FALSE	KRAS	A146T	12	25378562	C	T	ddPCR	0.0315321	iAR		GRCh37_POS		1-based position in human GRCh37 reference genome
SJALL005422_G2	FALSE	U2AF1	S231L	21	44513243	G	A	Inference	0.0450616	iAR		REF		reference allele
SJALL005426_G2	FALSE	MSH6	R959H	2	48027998	G	A	Inference	0.00586882	iAR		ALT		alternate allele
SJALL005426_G2	FALSE	JAK2	R938Q	9	5090497	G	A	ddPCR	0.00126845	iAR		Method		methods to confirm the NGS finding: ddPCR if the variant is validated by ddPCR, Inference if the variant is statistically predicted
SJALL017884_G2	FALSE	KRAS	A146V	12	25378561	G	A	ddPCR	0.0440279	iAR		VAF		variant allele frequency in 0 to 1 scale
SJALL017887_G1	FALSE	DNMT3A	R882C	2	25457243	G	A	ddPCR	0.00325934	iAR		Subtype		inferred age-related (iAR) if the sample that the variant belongs to is classified as age-related
SJALL017887_G1	FALSE	TP53	G266E	17	7577141	C	T	ddPCR	0.00132679	iAR				inferred therapy-related (iTR) if the sample that the variant belong to is classified as therapy-related
SJALL017887_G1	FALSE	STAT3	G618R	17	40475058	C	G	ddPCR	0.0171292	iAR
SJALL018398_G1	FALSE	TP53	R248W	17	7577539	G	A	ddPCR	0.00250962	iAR
SJALL018402_G1	FALSE	KRAS	L19F	12	25398262	C	G	Inference	0.00150096	iTR
SJALL018408_G1	FALSE	DNMT3A	W860R	2	25458595	A	G	ddPCR	0.00216643	iTR
SJALL018420_G1	FALSE	DNMT3A	Y735C	2	25463289	T	C	Inference	0.00458976	iAR
SJALL018461_G1	FALSE	DNMT3A	R736H	2	25463286	C	T	Inference	0.00464239	iAR
SJALL018480_G1	FALSE	TP53	E285*	17	7577085	C	A	Inference	0.00501594	iAR
SJALL018483_G1	FALSE	TP53	A138T	17	7578518	C	T	ddPCR	0.00134883	iTR
SJALL018490_G1	FALSE	STAT3	Y640F	17	40474482	T	A	ddPCR	0.00218464	iTR
SJALL018499_G1	FALSE	KRAS	A146V	12	25378561	G	A	ddPCR	0.002457	iAR
SJALL018524_G1	FALSE	APC	R283*	5	112151204	C	T	Inference	0.019475	iTR
SJALL018524_G1	FALSE	KMT2D	R5048C	12	49420607	G	A	Inference	0.0200245	iTR
SJALL018524_G1	FALSE	TP53	D208G	17	7578226	T	C	Inference	0.00988776	iTR
SJALL018541_G1	FALSE	KRAS	G13D	12	25398281	C	T	Inference	0.0262376	iAR
SJALL018923_G1	FALSE	DNMT3A	R598*	2	25467083	G	A	Inference	0.010247	iTR
SJALL018925_G1	FALSE	TP53	V173M	17	7578413	C	T	ddPCR	0.0152919	iTR
SJALL018928_G1	FALSE	STAT3	N647I	17	40474461	T	A	ddPCR	0.00364564	iTR
SJALL018929_G1	FALSE	DNMT3A	G543C	2	25467449	C	A	Inference	0.0147736	iTR
SJALL018935_G1	FALSE	IDH2	R140W	15	90631935	G	A	ddPCR	0.00125337	iAR
SJALL018936_G1	FALSE	TP53	R282W	17	7577094	G	A	ddPCR	0.00257546	iTR
SJALL018936_G1	FALSE	TP53	R273H	17	7577120	C	T	ddPCR	0.00198232	iTR
SJALL018936_G1	FALSE	TP53	R248W	17	7577539	G	A	ddPCR	0.00682153	iTR
SJALL018936_G1	FALSE	TP53	Y220C	17	7578190	T	C	ddPCR	0.00252628	iTR
SJALL018940_G1	FALSE	TET2	I1873T	4	106197285	T	C	Inference	0.00185619	iTR
SJALL018940_G1	FALSE	PTCH1	H739L	9	98231067	T	A	Inference	0.00465359	iTR
SJALL018940_G1	FALSE	TP53	R175H	17	7578406	C	T	ddPCR	0.00203167	iTR
SJALL018944_G1	FALSE	STAT3	D661Y	17	40474420	C	A	ddPCR	0.00519652	iAR
SJALL018950_G1	FALSE	GNB1	K57E	1	1747229	T	C	Inference	0.0400637	iTR
SJALL018952_G1	FALSE	TET2	R544*	4	106156729	C	T	ddPCR	0.00201759	iAR
SJALL018955_G1	FALSE	JAK2	V617F	9	5073770	G	T	ddPCR	0.00863192	iTR
SJALL018972_G1	FALSE	TET2	R544*	4	106156729	C	T	ddPCR	0.0214212	iAR
SJALL018988_G1	FALSE	JAK2	R938Q	9	5090497	G	A	ddPCR	0.0011274	iAR
SJALL018993_G1	FALSE	STAT3	N647I	17	40474461	T	A	ddPCR	0.00213648	iAR
SJALL018997_G1	FALSE	DNMT3A	R320*	2	25470516	G	A	Inference	0.0159562	iAR
SJALL018999_G1	FALSE	STAT3	D661Y	17	40474420	C	A	ddPCR	0.00915936	iAR
SJALL019001_G1	FALSE	STAT3	Y640F	17	40474482	T	A	ddPCR	0.00750426	iTR
SJALL019027_G1	FALSE	TP53	C176Y	17	7578403	C	T	Inference	0.00150887	iAR
SJALL019027_G1	FALSE	TP53	A161T	17	7578449	C	T	Inference	0.00154537	iAR
SJALL019052_G1	FALSE	DNMT3A	R882H	2	25457242	C	T	Inference	0.00264	iAR
SJALL019072_G1	FALSE	STAT3	G618R	17	40475058	C	G	ddPCR	0.0121303	iTR
SJALL019088_G1	FALSE	NRAS	G13D	1	115258744	C	T	ddPCR	0.020028	iTR
SJALL019092_G1	FALSE	ASXL1	R1415*	20	31024758	C	T	Inference	0.0089389	iAR
SJALL019709_G1	FALSE	KRAS	A146V	12	25378561	G	A	ddPCR	0.00110558	iTR
SJALL019709_G1	FALSE	GNAS	R201H	20	57484421	G	A	ddPCR	0.00151473	iTR
SJALL019715_G1	FALSE	TP53	R175H	17	7578406	C	T	ddPCR	0.00160304	iAR
SJALL019717_G1	FALSE	KRAS	L19F	12	25398262	C	G	ddPCR	0.00274984	iAR
SJALL019718_G1	FALSE	TP53	R175H	17	7578406	C	T	ddPCR	0.00162538	iAR
SJALL019728_G1	FALSE	TP53	R249S	17	7577534	C	A	ddPCR	0.00275804	iAR
SJALL019745_G1	FALSE	NF1	Y489C	17	29541542	A	G	Inference	0.00126208	iTR
SJALL040942_G1	FALSE	STAT3	Y640F	17	40474482	T	A	ddPCR	0.03356	iAR
SJALL040950_G1	FALSE	NF1	R1513*	17	29588751	C	T	ddPCR	0.00193279	iAR
SJALL040954_G1	FALSE	DNMT3A	R882H	2	25457242	C	T	Inference	0.00895734	iAR
SJALL041026_G1	FALSE	DNMT3A	R882H	2	25457242	C	T	ddPCR	0.00348843	iAR
SJALL041167_G1	FALSE	KRAS	L19F	12	25398262	C	G	Inference	0.00651872	iTR
SJALL041172_G1	FALSE	CBL	R420Q	11	119149251	G	A	Inference	0.00612397	iTR
SJALL041179_G1	FALSE	KRAS	L19F	12	25398262	C	G	Inference	0.0125016	iAR
SJALL041182_G1	FALSE	TET2	R1214W	4	106164772	C	T	Inference	0.00247006	iAR
SJALL041194_G1	FALSE	CBL	L380P	11	119148919	T	C	Inference	0.00946318	iAR
SJALL041195_G1	FALSE	GNAS	R416W	20	57429753	C	T	Inference	0.00185165	iTR
SJALL041203_G1	FALSE	KRAS	A146V	12	25378561	G	A	Inference	0.00570828	iTR
SJALL041216_G1	FALSE	PRDM1	R286C	6	106552891	C	T	Inference	0.00367549	iAR
SJALL041253_G1	FALSE	STAT3	G618R	17	40475058	C	G	Inference	0.00168054	iTR
SJALL041291_G1	FALSE	DNMT3A	R882H	2	25457242	C	T	Inference	0.0246413	iAR
SJALL041334_G1	FALSE	STAT3	G618R	17	40475058	C	G	Inference	0.00988616	iTR
SJALL041337_G1	FALSE	KRAS	V14I	12	25398279	C	T	Inference	0.00132709	iAR
SJALL041347_G1	FALSE	TP53	R175H	17	7578406	C	T	ddPCR	0.00134832	iTR
SJALL041369_G2	FALSE	KRAS	T20M	12	25398260	G	A	ddPCR	0.00212291	iAR
SJALL041390_G1	FALSE	STAT3	Y640F	17	40474482	T	A	Inference	0.00594667	iAR
SJALL041406_G1	FALSE	TP53	R175H	17	7578406	C	T	ddPCR	0.00159884	iAR
SJALL041423_G1	FALSE	PTPN11	V428M	12	112924336	G	A	Inference	0.00251811	iTR
SJALL041439_G1	FALSE	KRAS	G13C	12	25398282	C	A	Inference	0.00854978	iTR
SJALL041446_G1	FALSE	NRAS	G13D	1	115258744	C	T	Inference	0.0132024	iTR
SJALL041844_G1	FALSE	GNAS	R201H	20	57484421	G	A	ddPCR	0.00200321	iTR
SJALL041845_G1	FALSE	JAK2	R683G	9	5078360	A	G	ddPCR	0.00142177	iTR
SJALL041848_G1	FALSE	CBL	C384Y	11	119148931	G	A	ddPCR	0.00137709	iAR
SJALL041851_G1	FALSE	KRAS	L19F	12	25398262	C	G	ddPCR	0.00402613	iAR
SJALL041865_G1	FALSE	STAT3	G618R	17	40475058	C	G	ddPCR	0.000999765	iTR
SJALL041874_G1	FALSE	APC	R640W	5	112170822	C	T	Inference	0.00126796	iTR
SJALL041888_G1	FALSE	TET2	R1359H	4	106190798	G	A	ddPCR	0.00203321	iAR
SJALL041891_G1	FALSE	DNMT3A	I705T	2	25463568	A	G	ddPCR	0.00102263	iAR
SJALL041894_G1	FALSE	STAT3	Y640F	17	40474482	T	A	ddPCR	0.00155496	iAR
SJALL041896_G1	FALSE	ASXL1	R693*	20	31022592	C	T	Inference	0.00288551	iAR
SJALL042546_G1	FALSE	TET2	R1359C	4	106190797	C	T	ddPCR	0.0018018	iAR
SJALL042652_G1	FALSE	STAT3	Y640F	17	40474482	T	A	ddPCR	0.00221137	iAR
SJALL042653_G1	FALSE	TP53	R249S	17	7577534	C	G	ddPCR	0.0493927	iAR
SJALL042857_G1	FALSE	GNAS	R201H	20	57484421	G	A	ddPCR	0.00188442	iAR
SJALL044970_G1	FALSE	STAT3	G618R	17	40475058	C	G	ddPCR	0.00698014	iAR
SJAML001422_G2	FALSE	IDH2	R140Q	15	90631934	C	T	ddPCR	0.00734355	iTR
SJAML001422_G2	FALSE	TP53	R175H	17	7578406	C	T	ddPCR	0.00435374	iTR
SJAML001422_G2	FALSE	TP53	Q144*	17	7578500	G	A	ddPCR	0.00291023	iTR
SJAML001434_G2	FALSE	TP53	R273H	17	7577120	C	T	ddPCR	0.00191559	iAR
SJAML019109_G1	FALSE	DNMT3A	R882H	2	25457242	C	T	ddPCR	0.00164339	iAR
SJAML019110_G1	FALSE	CBL	R420Q	11	119149251	G	A	ddPCR	0.00116981	iAR
SJAML041465_G1	FALSE	TP53	R175H	17	7578406	C	T	ddPCR	0.00197833	iAR
SJCNS003205_G2	FALSE	NF1	R1241*	17	29562641	C	T	Inference	0.00133359	iAR
SJCNS010120_G1	FALSE	NRAS	Q61R	1	115256529	T	C	ddPCR	0.0051391	iAR
SJCNS018571_G1	FALSE	CBL	R420Q	11	119149251	G	A	Inference	0.00156185	iAR
SJCNS018576_G1	FALSE	TP53	R175H	17	7578406	C	T	ddPCR	0.00128467	iAR
SJCNS018580_G1	FALSE	RB1	R556*	13	48955550	C	T	Inference	0.00110337	iAR
SJCNS018588_G1	FALSE	TET2	R1214W	4	106164772	C	T	Inference	0.0160071	iAR
SJCNS018594_G1	FALSE	KRAS	L19F	12	25398262	C	G	Inference	0.00675425	iAR
SJCNS018597_G1	FALSE	KRAS	L19F	12	25398262	C	G	ddPCR	0.00699257	iTR
SJCNS019123_G1	FALSE	DNMT3A	P904L	2	25457176	G	A	ddPCR	0.00122955	iAR
SJCNS019124_G1	FALSE	DNMT3A	Y735C	2	25463289	T	C	Inference	0.0045428	iTR
SJCNS019124_G1	FALSE	KRAS	L19F	12	25398262	C	G	Inference	0.0025816	iTR
SJCNS019124_G1	FALSE	TP53	R273S	17	7577121	G	T	Inference	0.024117	iTR
SJCNS019157_G1	FALSE	KRAS	A146V	12	25378561	G	A	ddPCR	0.00173633	iTR
SJCNS019157_G1	FALSE	KRAS	T58I	12	25380285	G	A	ddPCR	0.0553656	iTR
SJCNS019177_G1	FALSE	IDH2	R140Q	15	90631934	C	T	ddPCR	0.0838918	iAR
SJCNS019180_G1	FALSE	KRAS	G13C	12	25398282	C	A	Inference	0.00427744	iTR
SJCNS019180_G1	FALSE	TP53	R249T	17	7577535	C	G	ddPCR	0.0149971	iTR
SJCNS019184_G1	FALSE	PTPN11	R498W	12	112926872	C	T	Inference	0.00282925	iTR
SJCNS019186_G1	FALSE	DNMT3A	R635W	2	25466800	G	A	ddPCR	0.00184738	iAR
SJCNS019766_G1	FALSE	SF3B1	K666N	2	198267359	C	A	ddPCR	0.0209037	iAR
SJCNS019766_G1	FALSE	NF1	R440*	17	29533315	C	T	ddPCR	0.00414584	iAR
SJCNS040979_G1	FALSE	TP53	A161T	17	7578449	C	T	Inference	0.00166616	iAR
SJCNS041473_G1	FALSE	STAT3	G618R	17	40475058	C	G	ddPCR	0.00406149	iTR
SJCNS041906_G1	FALSE	KRAS	L19F	12	25398262	C	G	ddPCR	0.00494333	iTR
SJCNS041909_G1	FALSE	U2AF1	S231L	21	44513243	G	A	Inference	0.0162682	iTR
SJCNS041961_G1	FALSE	KRAS	L19F	12	25398262	C	G	ddPCR	0.00899428	iTR
SJCNS041974_G1	FALSE	STAT3	Y640F	17	40474482	T	A	ddPCR	0.00545046	iAR
SJCNS041979_G1	FALSE	TP53	A138T	17	7578518	C	T	ddPCR	0.00116495	iAR
SJCNS042709_G1	FALSE	NRAS	G13V	1	115258744	C	A	ddPCR	0.0223089	iTR
SJCNS043125_G1	FALSE	KRAS	L19F	12	25398262	C	G	ddPCR	0.00348129	iTR
SJEWS018609_G1	FALSE	KRAS	G13C	12	25398282	C	A	Inference	0.0083989	iTR
SJEWS018625_G1	FALSE	STAT3	D661V	17	40474419	T	A	ddPCR	0.00275989	iTR
SJEWS019196_G1	FALSE	TP53	R248Q	17	7577538	C	T	ddPCR	0.00350628	iAR
SJEWS019206_G1	FALSE	STAT3	Y640F	17	40474482	T	A	ddPCR	0.00410513	iTR
SJEWS019207_G1	FALSE	RAD21	R65*	8	117875450	G	A	ddPCR	0.00106465	iTR
SJEWS041501_G2	FALSE	PTPN11	V428M	12	112924336	G	A	Inference	0.00323876	iTR
SJEWS041506_G1	FALSE	DNMT3A	R882H	2	25457242	C	T	Inference	0.0904364	iTR
SJEWS041506_G1	FALSE	DNMT3A	R882C	2	25457243	G	A	Inference	0.00581271	iTR
SJEWS041982_G1	FALSE	TET2	I1873T	4	106197285	T	C	Inference	0.00201571	iTR
SJEWS041982_G1	FALSE	STAT3	D661Y	17	40474420	C	A	ddPCR	0.0228432	iTR
SJEWS043122_G1	FALSE	TP53	G245D	17	7577547	C	T	Inference	0.00146762	iTR
SJEWS044169_G1	FALSE	KRAS	G12S	12	25398285	C	T	Inference	0.00212783	iTR
SJGCT018628_G1	FALSE	KRAS	L19F	12	25398262	C	G	ddPCR	0.00119284	iAR
SJGCT018631_G1	FALSE	KRAS	L19F	12	25398262	C	A	ddPCR	0.00372273	iTR
SJGCT018640_G1	FALSE	TP53	R181H	17	7578388	C	T	ddPCR	0.00185568	iTR
SJGCT019219_G1	FALSE	KRAS	A146T	12	25378562	C	T	ddPCR	0.0936847	iTR
SJGCT019220_G1	FALSE	DNMT3A	R882C	2	25457243	G	A	Inference	0.0040435	iAR
SJGCT019225_G1	FALSE	TP53	A138T	17	7578518	C	T	ddPCR	0.00123744	iTR
SJGCT019227_G1	FALSE	TP53	R249S	17	7577534	C	A	Inference	0.0042791	iTR
SJGCT019234_G1	FALSE	KRAS	A146P	12	25378562	C	G	ddPCR	0.00318345	iAR
SJGCT019235_G1	FALSE	TP53	K120E	17	7579329	T	C	ddPCR	0.00268954	iTR
SJGCT019235_G1	FALSE	BRCC3	E213K	X	154344345	G	A	Inference	0.00210716	iTR
SJGCT019237_G1	FALSE	TET2	R1214W	4	106164772	C	T	Inference	0.00250128	iTR
SJGCT040984_G1	FALSE	KRAS	G13D	12	25398281	C	T	Inference	0.00240529	iTR
SJGCT041512_G1	FALSE	DNMT3A	R729W	2	25463308	G	A	Inference	0.00463058	iAR
SJHIST011273_G1	FALSE	DNMT3A	V716I	2	25463536	C	T	ddPCR	0.0392685	iAR
SJHIST017902_G1	FALSE	KRAS	G13D	12	25398281	C	T	Inference	0.004452	iTR
SJHIST041020_G1	FALSE	DNMT3A	R882H	2	25457242	C	T	Inference	0.00336282	iAR
SJHL017906_G1	FALSE	STAT3	Y640F	17	40474482	T	A	ddPCR	0.0129987	iTR
SJHL018650_G1	FALSE	JAK2	V617F	9	5073770	G	T	ddPCR	0.00848057	iTR
SJHL018651_G1	FALSE	IDH2	R172G	15	90631839	T	C	Inference	0.0064336	iAR
SJHL018653_G1	FALSE	STAT3	N647I	17	40474461	T	A	ddPCR	0.00568445	iTR
SJHL018656_G1	FALSE	JAK2	R228Q	9	5054631	G	A	Inference	0.0041849	iTR
SJHL018657_G1	FALSE	PTPN11	V428M	12	112924336	G	A	Inference	0.0153182	iTR
SJHL018665_G1	FALSE	NF1	R1306Q	17	29562982	G	A	Inference	0.00291498	iTR
SJHL018666_G1	FALSE	CREBBP	R1347W	16	3790494	G	A	Inference	0.00749251	iAR
SJHL018667_G1	FALSE	DNMT3A	R635W	2	25466800	G	A	ddPCR	0.00398556	iTR
SJHL018673_G1	FALSE	TP53	R267W	17	7577139	G	A	ddPCR	0.00586628	iTR
SJHL018680_G1	FALSE	STAT3	Y640F	17	40474482	T	A	ddPCR	0.00281755	iTR
SJHL018682_G1	FALSE	STAT3	Y640F	17	40474482	T	A	ddPCR	0.00295596	iTR
SJHL018687_G1	FALSE	TP53	P278S	17	7577106	G	A	ddPCR	0.00129844	iAR
SJHL018692_G1	FALSE	TNFAIP3	R271*	6	138198218	C	T	Inference	0.00824629	iAR
SJHL018702_G1	FALSE	STAT3	Y640F	17	40474482	T	A	ddPCR	0.00550315	iTR
SJHL018710_G1	FALSE	RB1	R579*	13	49027168	C	T	Inference	0.00948132	iTR
SJHL018720_G1	FALSE	STAT3	Y640F	17	40474482	T	A	ddPCR	0.00534959	iTR
SJHL018722_G1	FALSE	STAT3	D661Y	17	40474420	C	A	ddPCR	0.00258503	iTR
SJHL019247_G1	FALSE	DNMT3A	R635W	2	25466800	G	A	ddPCR	0.00158532	iTR
SJHL019248_G1	FALSE	TET2	R1216*	4	106164778	C	T	ddPCR	0.00392531	iAR
SJHL019249_G1	FALSE	STAT3	N647I	17	40474461	T	A	Inference	0.0101891	iTR
SJHL019251_G1	FALSE	TP53	K132Q	17	7578536	T	G	ddPCR	0.00310631	iTR
SJHL019255_G1	FALSE	TP53	D281N	17	7577097	C	T	ddPCR	0.00394063	iTR
SJHL019257_G1	FALSE	TP53	S215C	17	7578206	T	A	ddPCR	0.00585869	iTR
SJHL019257_G1	FALSE	STAT3	Y640F	17	40474482	T	A	ddPCR	0.00480274	iTR
SJHL019258_G1	FALSE	TP53	C141Y	17	7578508	C	T	ddPCR	0.00616256	iTR
SJHL019262_G1	FALSE	TP53	C277Y	17	7577108	C	T	ddPCR	0.00496112	iTR
SJHL019266_G1	FALSE	STAT3	N647I	17	40474461	T	A	ddPCR	0.00563355	iTR
SJHL019269_G1	FALSE	KRAS	G12S	12	25398285	C	T	Inference	0.00239963	iTR
SJHL019278_G1	FALSE	STAT3	Y640F	17	40474482	T	A	Inference	0.0105367	iTR
SJHL019283_G1	FALSE	TP53	V218E	17	7578196	A	T	ddPCR	0.00860343	iTR
SJHL019283_G1	FALSE	STAT3	Y640F	17	40474482	T	A	ddPCR	0.00307937	iTR
SJHL019285_G1	FALSE	TP53	R273C	17	7577121	G	A	ddPCR	0.00274129	iTR
SJHL019292_G1	FALSE	STAT3	Y640F	17	40474482	T	A	ddPCR	0.0017548	iTR
SJHL019293_G1	FALSE	STAT3	Y640F	17	40474482	T	A	ddPCR	0.00998851	iTR
SJHL019295_G1	FALSE	DNMT3A	R736H	2	25463286	C	T	ddPCR	0.002837	iAR
SJHL019296_G1	FALSE	DNMT3A	S770L	2	25463184	G	A	ddPCR	0.00583055	iAR
SJHL019303_G1	FALSE	STAT3	G618R	17	40475058	C	G	ddPCR	0.00100014	iTR
SJHL019304_G1	FALSE	CBL	L380P	11	119148919	T	C	ddPCR	0.00170563	iTR
SJHL019318_G1	FALSE	STAT3	Y640F	17	40474482	T	A	ddPCR	0.0015444	iTR
SJHL019320_G1	FALSE	PTCH1	Q365*	9	98241404	G	A	Inference	0.0030916	iTR
SJHL019323_G1	FALSE	STAT3	Y640F	17	40474482	T	A	ddPCR	0.007858	iTR
SJHL019324_G1	FALSE	TET2	I1873T	4	106197285	T	C	Inference	0.00205101	iTR
SJHL019330_G1	FALSE	TP53	A276P	17	7577112	C	G	ddPCR	0.00712897	iTR
SJHL019336_G1	FALSE	DNMT3A	R882H	2	25457242	C	T	Inference	0.00322234	iAR
SJHL019336_G1	FALSE	DNMT3A	S714C	2	25463541	G	C	Inference	0.00117485	iAR
SJHL019340_G1	FALSE	STAT3	Y640F	17	40474482	T	A	ddPCR	0.0325359	iAR
SJHL019345_G1	FALSE	DNMT3A	R320*	2	25470516	G	A	ddPCR	0.00204418	iAR
SJHL019357_G1	FALSE	DNMT3A	R598*	2	25467083	G	A	ddPCR	0.00268844	iTR
SJHL019779_G1	FALSE	STAT3	Y640F	17	40474482	T	A	ddPCR	0.0826109	iTR
SJHL019782_G1	FALSE	U2AF1	R156H	21	44514780	C	T	Inference	0.00209029	iAR
SJHL019790_G1	FALSE	TP53	R175H	17	7578406	C	T	ddPCR	0.00250823	iAR
SJHL040962_G1	FALSE	STAT3	Y640F	17	40474482	T	A	ddPCR	0.00179567	iTR
SJHL041004_G1	FALSE	JAK2	R683G	9	5078360	A	G	ddPCR	0.00300126	iTR
SJHL041019_G1	FALSE	TP53	P278H	17	7577105	G	T	ddPCR	0.00612692	iTR
SJHL041526_G1	FALSE	DNMT3A	S714C	2	25463541	G	C	ddPCR	0.00407072	iTR
SJHL041530_G1	FALSE	TP53	C277Y	17	7577108	C	T	ddPCR	0.00898204	iTR
SJHL041530_G1	FALSE	STAT3	Y640F	17	40474482	T	A	ddPCR	0.00913242	iTR
SJHL041530_G1	FALSE	STAT3	G618R	17	40475058	C	G	ddPCR	0.0019578	iTR
SJHL041531_G1	FALSE	GNAS	R201H	20	57484421	G	A	ddPCR	0.00177504	iTR
SJHL041536_G1	FALSE	STAT3	Y640F	17	40474482	T	A	Inference	0.00794913	iTR
SJHL041538_G1	FALSE	TP53	Y220C	17	7578190	T	C	ddPCR	0.00134967	iTR
SJHL041538_G1	FALSE	TP53	V173M	17	7578413	C	T	ddPCR	0.0013784	iTR
SJHL041538_G1	FALSE	TP53	C141Y	17	7578508	C	T	ddPCR	0.00192555	iTR
SJHL041538_G1	FALSE	STAT3	Y640F	17	40474482	T	A	ddPCR	0.0021645	iTR
SJHL041539_G1	FALSE	STAT3	G618R	17	40475058	C	G	ddPCR	0.00153682	iTR
SJHL041541_G1	FALSE	STAT3	D661Y	17	40474420	C	A	ddPCR	0.00714592	iTR
SJHL041541_G1	FALSE	STAT3	Y640F	17	40474482	T	A	ddPCR	0.00579206	iTR
SJHL041564_G1	FALSE	NF1	R1947*	17	29661945	C	T	ddPCR	0.0130293	iAR
SJHL042007_G1	FALSE	TP53	A138T	17	7578518	C	T	ddPCR	0.00153669	iTR
SJHL042007_G1	FALSE	BCOR	R810*	X	39932171	G	A	ddPCR	0.00122933	iTR
SJHL042009_G1	FALSE	STAT3	G618R	17	40475058	C	G	ddPCR	0.00172856	iTR
SJHL042010_G1	FALSE	CBL	P417L	11	119149242	C	T	Inference	0.00149147	iAR
SJHL042020_G1	FALSE	STAT3	Y640F	17	40474482	T	A	ddPCR	0.00423344	iTR
SJHL042024_G1	FALSE	STAT3	D661V	17	40474419	T	A	ddPCR	0.00852084	iTR
SJHL042024_G1	FALSE	STAT3	Y640F	17	40474482	T	A	ddPCR	0.00741415	iTR
SJHL042025_G1	FALSE	STAT3	Y640F	17	40474482	T	A	ddPCR	0.00786651	iTR
SJHL042029_G1	FALSE	DNMT3A	V716I	2	25463536	C	T	ddPCR	0.00130053	iTR
SJHL042032_G1	FALSE	DNMT3A	M801V	2	25462006	T	C	ddPCR	0.00239477	iAR
SJHL042037_G1	FALSE	DNMT3A	R729W	2	25463308	G	A	ddPCR	0.0095052	iAR
SJHL042040_G1	FALSE	TP53	A138T	17	7578518	C	T	ddPCR	0.00109895	iAR
SJHL042476_G1	FALSE	TP53	Y220C	17	7578190	T	C	ddPCR	0.00251214	iTR
SJHL042510_G1	FALSE	TP53	Y205S	17	7578235	T	G	ddPCR	0.0233756	iTR
SJHL042720_G1	FALSE	GNB1	K57E	1	1747229	T	C	Inference	0.0315556	iAR
SJHL042720_G1	FALSE	STAT3	N647I	17	40474461	T	A	ddPCR	0.00140752	iAR
SJHL042724_G1	FALSE	STAT3	Y640F	17	40474482	T	A	ddPCR	0.00434388	iAR
SJHL042725_G1	FALSE	STAT3	Y640F	17	40474482	T	A	ddPCR	0.00554259	iTR
SJHL042843_G1	FALSE	STAT3	D661Y	17	40474420	C	A	ddPCR	0.0335142	iAR
SJHL043973_G1	FALSE	BCOR	R1480*	X	39916463	G	A	ddPCR	0.00216582	iTR
SJHL044965_G1	FALSE	CBL	Y371H	11	119148891	T	C	Inference	0.00494309	iTR
SJHM019549_G1	FALSE	GNB1	K57E	1	1747229	T	C	Inference	0.0019972	iTR
SJHM019549_G1	FALSE	TP53	V31I	17	7579705	C	T	ddPCR	0.0457621	iTR
SJNBL006063_G2	FALSE	KRAS	L19F	12	25398262	C	G	ddPCR	0.00152964	iTR
SJNBL017916_G1	FALSE	STAT3	D661V	17	40474419	T	A	Inference	0.00786118	iAR
SJNBL018748_G1	FALSE	KRAS	A146P	12	25378562	C	G	ddPCR	0.00218579	iAR
SJNBL018754_G1	FALSE	KRAS	G60D	12	25380279	C	T	ddPCR	0.00933238	iAR
SJNBL018757_G1	FALSE	PTPN11	G503E	12	112926888	G	A	Inference	0.00393362	iAR
SJNBL019402_G1	FALSE	DNMT3A	M801V	2	25462006	T	C	ddPCR	0.0040674	iAR
SJNBL019407_G1	FALSE	KRAS	L19F	12	25398262	C	G	ddPCR	0.00632022	iTR
SJNBL019409_G1	FALSE	KRAS	A18D	12	25398266	G	T	Inference	0.181929	iAR
SJNBL019411_G1	FALSE	DNMT3A	R882H	2	25457242	C	T	ddPCR	0.00315053	iTR
SJNBL019423_G1	FALSE	NRAS	A146T	1	115252204	C	T	ddPCR	0.00542064	iAR
SJNBL019427_G1	FALSE	KRAS	L19F	12	25398262	C	G	ddPCR	0.00168622	iTR
SJNBL041595_G1	FALSE	KRAS	L19F	12	25398262	C	G	Inference	0.00436421	iAR
SJNBL042061_G1	FALSE	KRAS	G60D	12	25380279	C	T	ddPCR	0.00175824	iAR
SJNBL043459_G1	FALSE	DNMT3A	Y735C	2	25463289	T	C	Inference	0.00832387	iAR
SJNHL018765_G1	FALSE	SDHA	A466T	5	236678	G	A	Inference	0.0168551	iAR
SJNHL018773_G1	FALSE	TP53	R175H	17	7578406	C	T	ddPCR	0.00538358	iTR
SJNHL018775_G1	FALSE	CBL	R420Q	11	119149251	G	A	ddPCR	0.0176289	iTR
SJNHL018776_G1	FALSE	DNMT3A	R882C	2	25457243	G	A	Inference	0.00151956	iTR
SJNHL018776_G1	FALSE	TP53	D281H	17	7577097	C	G	Inference	0.0041161	iTR
SJNHL018776_G1	FALSE	STAT3	G618R	17	40475058	C	G	Inference	0.00167397	iTR
SJNHL018783_G1	FALSE	PTPN11	G503R	12	112926887	G	A	Inference	0.00221656	iAR
SJNHL018783_G1	FALSE	STAT3	D661Y	17	40474420	C	A	ddPCR	0.00300359	iAR
SJNHL018786_G1	FALSE	KRAS	G13D	12	25398281	C	T	Inference	0.00802722	iTR
SJNHL019441_G1	FALSE	TP53	R290H	17	7577069	C	T	ddPCR	0.00194091	iTR
SJNHL019443_G1	FALSE	TET2	S1059*	4	106158275	C	G	ddPCR	0.00197144	iTR
SJNHL019443_G1	FALSE	STAT3	S614R	17	40475068	G	C	ddPCR	0.00192407	iTR
SJNHL019444_G1	FALSE	TP53	G262V	17	7577153	C	A	Inference	0.00374785	iAR
SJNHL019449_G1	FALSE	DNMT3A	R882C	2	25457243	G	A	ddPCR	0.00386038	iAR
SJNHL019450_G1	FALSE	DNMT3A	R882C	2	25457243	G	A	ddPCR	0.00227766	iTR
SJNHL019462_G1	FALSE	KRAS	L19F	12	25398262	C	G	ddPCR	0.0013382	iAR
SJNHL019479_G1	FALSE	KRAS	L19F	12	25398262	C	G	ddPCR	0.00269801	iTR
SJNHL019486_G1	FALSE	DNMT3A	R882H	2	25457242	C	T	ddPCR	0.00225868	iTR
SJNHL019490_G1	FALSE	DNMT3A	R882C	2	25457243	G	A	ddPCR	0.00789262	iTR
SJNHL019498_G1	FALSE	U2AF1	S34Y	21	44524456	G	T	Inference	0.0048442	iAR
SJNHL019500_G1	FALSE	TP53	R175H	17	7578406	C	T	ddPCR	0.00216169	iAR
SJNHL019810_G1	FALSE	KRAS	L19F	12	25398262	C	G	ddPCR	0.00269798	iTR
SJNHL041021_G1	FALSE	KRAS	G13D	12	25398281	C	T	Inference	0.0013865	iTR
SJNHL041625_G1	FALSE	TP53	G245S	17	7577548	C	T	ddPCR	0.134586	iAR
SJNHL042065_G1	FALSE	TP53	V197M	17	7578260	C	T	ddPCR	0.00109162	iAR
SJNHL042519_G1	FALSE	TET2	R1216*	4	106164778	C	T	ddPCR	0.0149927	iAR
SJNHL042858_G1	FALSE	KRAS	A146V	12	25378561	G	A	ddPCR	0.0128877	iTR
SJNHL043118_G1	FALSE	GNAS	R201H	20	57484421	G	A	ddPCR	0.00247313	iAR
SJNHL043897_G1	FALSE	GNAS	R416W	20	57429753	C	T	Inference	0.00164365	iAR
SJNORM044989_G1	TRUE	DNMT3A	R771*	2	25463182	G	A	ddPCR	0.00619579	iAR
SJNORM044990_G1	TRUE	DNMT3A	P904L	2	25457176	G	A	ddPCR	0.00161566	iAR
SJNORM044991_G1	TRUE	DNMT3A	R320*	2	25470516	G	A	ddPCR	0.00154836	iAR
SJNORM045000_G1	TRUE	DNMT3A	R749C	2	25463248	G	A	ddPCR	0.00314795	iAR
SJNORM045000_G1	TRUE	DNMT3A	R729W	2	25463308	G	A	ddPCR	0.00194232	iAR
SJNORM045035_G1	TRUE	BCOR	R1183*	X	39923059	G	A	ddPCR	0.00351461	iAR
SJNORM045040_G1	TRUE	TP53	V143M	17	7578503	C	T	Inference	0.00223198	iAR
SJNORM045050_G1	TRUE	PTCH1	T1214M	9	98211514	G	A	Inference	0.00425532	iAR
SJNORM045057_G1	TRUE	CBL	H398R	11	119148973	A	G	ddPCR	0.00441339	iAR
SJNORM045057_G1	TRUE	KRAS	G12S	12	25398285	C	T	Inference	0.00645697	iAR
SJNORM045067_G1	TRUE	KRAS	G13D	12	25398281	C	T	Inference	0.00147302	iAR
SJNORM045100_G1	TRUE	STAT3	S614R	17	40475068	G	C	ddPCR	0.00357962	iAR
SJNORM045136_G1	TRUE	NRAS	G12D	1	115258747	C	T	Inference	0.00512589	iAR
SJNORM045155_G1	TRUE	TP53	T170M	17	7578421	G	A	Inference	0.0386657	iAR
SJNORM045200_G1	TRUE	STAT3	Y640F	17	40474482	T	A	ddPCR	0.00955034	iAR
SJNORM045207_G1	TRUE	KRAS	G13D	12	25398281	C	T	Inference	0.0068166	iAR
SJNORM045209_G1	TRUE	TP53	A161T	17	7578449	C	T	Inference	0.00144502	iAR
SJNORM045211_G1	TRUE	KRAS	Q22K	12	25398255	G	T	ddPCR	0.0147711	iAR
SJNORM045221_G1	TRUE	TP53	A138T	17	7578518	C	T	ddPCR	0.00146707	iAR
SJNORM045243_G1	TRUE	TET2	I1873T	4	106197285	T	C	Inference	0.0015361	iAR
SJNORM045303_G1	TRUE	DNMT3A	S714C	2	25463541	G	C	ddPCR	0.00247057	iAR
SJNORM045724_G1	TRUE	NF1	R1849W	17	29654856	C	T	Inference	0.00211082	iAR
SJNPC019501_G1	FALSE	TP53	G266V	17	7577141	C	A	ddPCR	0.0030881	iAR
SJOS018805_G1	FALSE	DNMT3A	R882H	2	25457242	C	T	ddPCR	0.0066365	iTR
SJOS018809_G1	FALSE	STAT3	D661V	17	40474419	T	A	ddPCR	0.00540414	iTR
SJOS018811_G1	FALSE	TP53	Q317*	17	7576897	G	A	ddPCR	0.00220051	iTR
SJOS018812_G1	FALSE	TP53	A161T	17	7578449	C	T	Inference	0.00547778	iAR
SJOS019507_G1	FALSE	DNMT3A	V716I	2	25463536	C	T	ddPCR	0.00290636	iAR
SJOS019510_G1	FALSE	KRAS	G13D	12	25398281	C	T	Inference	0.00296422	iAR
SJOS019510_G1	FALSE	STAT3	S614R	17	40475070	T	G	ddPCR	0.00163014	iAR
SJOS019512_G1	FALSE	TET2	R550*	4	106156747	C	T	ddPCR	0.0484869	iAR
SJOS019515_G1	FALSE	KMT2D	R4484*	12	49425038	G	A	Inference	0.0020155	iAR
SJOS019525_G1	FALSE	JAK2	V617F	9	5073770	G	T	ddPCR	0.00561102	iTR
SJOS019531_G1	FALSE	SDHA	A449V	5	236628	C	T	Inference	0.0202272	iAR
SJOS019537_G1	FALSE	KRAS	A146V	12	25378561	G	A	ddPCR	0.00153508	iAR
SJOS019548_G1	FALSE	TP53	R175H	17	7578406	C	T	ddPCR	0.00240332	iTR
SJOS019812_G1	FALSE	TNFAIP3	R271*	6	138198218	C	T	Inference	0.00382837	iAR
SJOS042102_G1	FALSE	PTPN11	G503E	12	112926888	G	A	Inference	0.00369997	iTR
SJOS042102_G1	FALSE	CREBBP	S893L	16	3820773	G	A	Inference	0.00129883	iTR
SJRB018835_G1	FALSE	KRAS	A59G	12	25380282	G	C	ddPCR	0.0367555	iTR
SJRB019555_G1	FALSE	TP53	Y220C	17	7578190	T	C	Inference	0.0127961	iTR
SJRB019569_G1	FALSE	KRAS	L19F	12	25398262	C	G	ddPCR	0.00310459	iAR
SJRB019815_G1	FALSE	JAK2	V617F	9	5073770	G	T	Inference	0.0306234	iTR
SJRB019819_G1	FALSE	KRAS	G12S	12	25398285	C	T	Inference	0.00304987	iTR
SJRB019820_G1	FALSE	NRAS	G13R	1	115258745	C	G	ddPCR	0.00116183	iAR
SJRB041652_G1	FALSE	TET2	R1452*	4	106193892	C	T	ddPCR	0.259015	iTR
SJRHB003933_G2	FALSE	GNAS	R201H	20	57484421	G	A	ddPCR	0.00157895	iTR
SJRHB017943_G1	FALSE	STAT3	Y640F	17	40474482	T	A	Inference	0.0173776	iTR
SJRHB018836_G1	FALSE	KRAS	G12D	12	25398284	C	T	Inference	0.00354997	iTR
SJRHB018837_G1	FALSE	ASXL1	R404*	20	31021211	C	T	ddPCR	0.00114687	iTR
SJRHB019579_G1	FALSE	TP53	R175H	17	7578406	C	T	ddPCR	0.00172466	iTR
SJRHB019581_G1	FALSE	GNAS	R201H	20	57484421	G	A	ddPCR	0.00168337	iAR
SJRHB019582_G1	FALSE	DNMT3A	R771*	2	25463182	G	A	ddPCR	0.00738946	iTR
SJRHB019587_G1	FALSE	DNMT3A	R320*	2	25470516	G	A	ddPCR	0.00507029	iTR
SJRHB019591_G1	FALSE	GNAS	R201H	20	57484421	G	A	ddPCR	0.00123745	iAR
SJRHB019594_G1	FALSE	TP53	R175H	17	7578406	C	T	ddPCR	0.00186871	iTR
SJRHB041675_G1	FALSE	NRAS	Q61R	1	115256529	T	C	Inference	0.0141148	iAR
SJRHB041675_G1	FALSE	TET2	Q916*	4	106157845	C	T	Inference	0.00198413	iAR
SJRHB041675_G1	FALSE	KRAS	Q61E	12	25380277	G	C	Inference	0.00143299	iAR
SJRHB041676_G1	FALSE	TET2	Q916*	4	106157845	C	T	Inference	0.00165942	iTR
SJRHB042116_G1	FALSE	KRAS	L19F	12	25398262	C	A	ddPCR	0.0542005	iTR
SJRHB042506_G1	FALSE	KRAS	A146T	12	25378562	C	T	ddPCR	0.00993807	iTR
SJRHB044165_G1	FALSE	TP53	A138P	17	7578518	C	G	ddPCR	0.00118844	iTR
SJRHB044167_G1	FALSE	KRAS	Q22K	12	25398255	G	T	ddPCR	0.0407116	iTR
SJST019552_G1	FALSE	TP53	R273H	17	7577120	C	T	ddPCR	0.00211458	iTR
SJSTS018851_G1	FALSE	DNMT3A	Y735C	2	25463289	T	C	Inference	0.00430154	iAR
SJSTS018855_G1	FALSE	RB1	S567L	13	49027133	C	T	Inference	0.00155536	iAR
SJSTS018855_G1	FALSE	TP53	E287*	17	7577079	C	A	Inference	0.00430469	iAR
SJSTS018858_G1	FALSE	DNMT3A	R736H	2	25463286	C	T	ddPCR	0.00360294	iAR
SJSTS018862_G1	FALSE	CREBBP	Y1503H	16	3786704	A	G	Inference	0.0159681	iAR
SJSTS018863_G1	FALSE	DNMT3A	G685R	2	25464460	C	T	ddPCR	0.00251173	iAR
SJSTS018867_G1	FALSE	APC	S1356*	5	112175358	C	A	Inference	0.0182442	iTR
SJSTS018873_G1	FALSE	DNMT3A	R736H	2	25463286	C	T	ddPCR	0.00185634	iAR
SJSTS019605_G1	FALSE	STAT3	G618R	17	40475058	C	G	ddPCR	0.00142712	iAR
SJSTS019607_G1	FALSE	NRAS	G13D	1	115258744	C	T	ddPCR	0.00430376	iAR
SJSTS019611_G1	FALSE	TET2	R1214W	4	106164772	C	T	Inference	0.00274848	iTR
SJSTS019617_G1	FALSE	DNMT3A	Y735C	2	25463289	T	C	Inference	0.00531209	iAR
SJSTS019836_G1	FALSE	DNMT3A	R736C	2	25463287	G	A	Inference	0.00273973	iAR
SJSTS019838_G1	FALSE	TET2	R1366H	4	106190819	G	A	ddPCR	0.00632393	iTR
SJSTS019838_G1	FALSE	STAT3	Y640F	17	40474482	T	A	ddPCR	0.00441124	iTR
SJSTS042126_G1	FALSE	TP53	P190S	17	7578281	G	A	Inference	0.00128849	iAR
SJSTS042888_G1	FALSE	DNMT3A	R729W	2	25463308	G	A	ddPCR	0.00749064	iAR
SJWLM017953_G2	FALSE	GNAS	R201H	20	57484421	G	A	ddPCR	0.00145482	iAR
SJWLM017958_G1	FALSE	KRAS	A146V	12	25378561	G	A	ddPCR	0.0206316	iAR
SJWLM018887_G1	FALSE	KRAS	G13D	12	25398281	C	T	Inference	0.00244672	iAR
SJWLM018889_G1	FALSE	DNMT3A	R749C	2	25463248	G	A	ddPCR	0.0188679	iAR
SJWLM018892_G1	FALSE	TP53	Q144*	17	7578500	G	A	ddPCR	0.00132049	iAR
SJWLM018902_G1	FALSE	STAT3	S614R	17	40475068	G	C	ddPCR	0.0011525	iAR
SJWLM018906_G1	FALSE	CREBBP	A1100V	16	3808925	G	A	Inference	0.0153294	iAR
SJWLM019630_G1	FALSE	SF3B1	K700E	2	198266834	T	C	Inference	0.00836538	iAR
SJWLM019645_G1	FALSE	DNMT3A	P904L	2	25457176	G	A	ddPCR	0.00122963	iAR
SJWLM019674_G1	FALSE	STAT3	Y640F	17	40474482	T	A	ddPCR	0.0166223	iAR
SJWLM019691_G1	FALSE	NF1	R2496*	17	29679366	C	T	ddPCR	0.002326	iAR
SJWLM019707_G1	FALSE	STAT3	Y640F	17	40474482	T	A	ddPCR	0.0866361	iAR
SJWLM019840_G1	FALSE	TP53	R181H	17	7578388	C	T	ddPCR	0.00135318	iAR
SJWLM044962_G1	FALSE	STAT3	N647I	17	40474461	T	A	ddPCR	0.00137352	iAR
SJALL004768_G3	FALSE	ASXL1	N57fs	20	30956844	A	GT	ddPCR	0.00143541	iAR
SJALL010138_G1	FALSE	DNMT3A	S663fs	2	25464525	GAG	A	ddPCR	0.00121387	iTR
SJALL017881_G1	FALSE	ASXL1	C1508*	20	31025038	GC	G	Inference	0.00487378	iTR
SJALL018402_G1	FALSE	TET2	A277_Q278fs	4	106155929	CACAG	C	Inference	0.00419742	iTR
SJALL018418_G1	FALSE	DNMT3A	D252fs	2	25471006	TC	T	Inference	0.00246742	iAR
SJALL018529_G1	FALSE	TNFAIP3	I339fs	6	138199598	TC	T	Inference	0.0082153	iAR
SJALL018953_G1	FALSE	KMT2D	R3164_S3175fs	12	49431615	CTAGAAAATGGCCCTGTGCCCATCCGGGTATCCCG	C	Inference	0.00227039	iTR
SJALL018959_G1	FALSE	DICER1	L1303fs	14	95569825	AG	A	Inference	0.00221219	iTR
SJALL018968_G1	FALSE	TET2	I274fs	4	106155920	TC	T	ddPCR	0.00112245	iTR
SJALL018972_G1	FALSE	TET2	N132fs	4	106155494	AT	A	ddPCR	0.00367382	iAR
SJALL018993_G1	FALSE	DNMT3A	N273fs	2	25470941	CA	C	Inference	0.00250598	iAR
SJALL019083_G1	FALSE	NF1	R652fs	17	29552220	AC	A	Inference	0.00280852	iAR
SJALL019716_G1	FALSE	TET2	R369fs	4	106156204	C	CAT	Inference	0.00333884	iTR
SJALL019731_G1	FALSE	DNMT3A	V704fs	2	25463569	TCA	T	ddPCR	0.00463044	iAR
SJALL041286_G1	FALSE	KMT2D	M2784fs	12	49433020	A	AG	Inference	0.00196637	iAR
SJALL041308_G1	FALSE	TNFAIP3	S190fs	6	138196906	TCA	T	Inference	0.00295469	iTR
SJALL041384_G1	FALSE	BRCA2	L1715fs	13	32913636	TG	T	Inference	0.027088	iAR
SJALL041431_G2	FALSE	TET2	N71fs	4	106155311	AT	A	Inference	0.00208073	iAR
SJALL042653_G1	FALSE	TP53	P27del	17	7579714	CAGG	C	ddPCR	0.00420642	iAR
SJALL042654_G1	FALSE	DNMT3A	E629fs	2	25466816	CT	C	ddPCR	0.00373423	iAR
SJAML019100_G1	FALSE	TET2	L230fs	4	106155787	CTG	C	Inference	0.0372175	iAR
SJAML019102_G1	FALSE	TET2	Q70>Q*	4	106155309	G	GTA	Inference	0.00844999	iTR
SJCNS018567_G1	FALSE	TET2	G1442fs	4	106193863	GT	G	ddPCR	0.00382478	iAR
SJCNS019184_G1	FALSE	TET2	I274fs	4	106155920	TC	T	ddPCR	0.00345261	iTR
SJCNS019189_G1	FALSE	RAD21	I170_M171>M	8	117869681	CATT	C	ddPCR	0.00248792	iAR
SJCNS041913_G1	FALSE	TP53	K292_G293fs	17	7577060	CCTTT	C	ddPCR	0.0555665	iTR
SJCNS041916_G1	FALSE	TNFAIP3	H748_E751fs	6	138202326	ACCGGGGTGAG	A	Inference	0.0162635	iAR
SJCNS041929_G1	FALSE	BCOR	I1532_M1535>M	X	39914655	CATTTTCATG	C	ddPCR	0.00245655	iTR
SJCNS041929_G1	FALSE	KMT2D	A3678fs	12	49427456	CC	G	Inference	0.00113692	iTR
SJCNS043939_G1	FALSE	TET2	Q910fs	4	106157826	AC	A	ddPCR	0.00148991	iAR
SJCNS043974_G1	FALSE	TNFAIP3	H44fs	6	138192493	GC	G	Inference	0.00541272	iTR
SJEWS041991_G1	FALSE	TNFAIP3	I196_F197>I	6	138196924	ATAT	A	Inference	0.0119203	iTR
SJGCT018639_G1	FALSE	CREBBP	A283fs	16	3860729	C	CG	Inference	0.00132699	iTR
SJGICT042113_G1	FALSE	NF1	T2590_D2591fs	17	29684069	TACTG	T	ddPCR	0.00250718	iAR
SJHIST019241_G1	FALSE	BRCA1	T327_C328fs	17	41246565	CAT	C	Inference	0.00617989	iAR
SJHL018653_G1	FALSE	CREBBP	E1400_G1404fs	16	3789647	GCCGTCAATTTCCT	G	Inference	0.00195815	iTR
SJHL018714_G1	FALSE	APC	S296_T297>R	5	112151244	GCAC	G	Inference	0.00110597	iAR
SJHL018715_G1	FALSE	ASXL1	D1495fs	20	31024999	AC	A	Inference	0.00395054	iAR
SJHL019257_G1	FALSE	ZRSR2	R417_H418fs	X	15841166	GGC	G	Inference	0.00469057	iTR
SJHL019265_G1	FALSE	DNMT3A	C549fs	2	25467430	CA	C	ddPCR	0.00396221	iAR
SJHL019278_G1	FALSE	BRCA2	D1420_F1421del	13	32912749	AGATTTT	A	Inference	0.00459692	iTR
SJHL019295_G1	FALSE	DNMT3A	R320_A322fs	2	25470509	GCTGCT	G	Inference	0.00168587	iAR
SJHL019302_G1	FALSE	DNMT3A	V560fs	2	25467196	AC	A	ddPCR	0.00148968	iTR
SJHL019317_G1	FALSE	TET2	E1268fs	4	106164934	GA	G	ddPCR	0.00199126	iTR
SJHL019780_G1	FALSE	KMT2D	Q3959fs	12	49426612	TG	T	Inference	0.00333773	iTR
SJHL019784_G1	FALSE	DNMT3A	G843fs	2	25458646	CC	G	ddPCR	0.0287449	iTR
SJHL041019_G1	FALSE	TNFAIP3	W142fs	6	138196111	GG	C	Inference	0.0183186	iTR
SJHL041526_G1	FALSE	ASXL1	L702fs	20	31022620	T	TG	ddPCR	0.023539	iTR
SJHL041542_G1	FALSE	TNFAIP3	G99fs	6	138192658	CGGTAA	C	Inference	0.00228363	iAR
SJHL042033_G1	FALSE	TET2	Q810fs	4	106157527	CA	C	Inference	0.00273518	iAR
SJHL042052_G1	FALSE	BRCC3	Y121fs	X	154306935	GT	G	Inference	0.0322099	iAR
SJHL043129_G1	FALSE	TET2	Y1255_G1256fs	4	106164895	TACGGC	T	Inference	0.00544037	iTR
SJHL043973_G1	FALSE	BCOR	L332fs	X	39933602	AC	A	Inference	0.00198076	iTR
SJLM019373_G1	FALSE	ASXL1	G642fs	20	31022441	A	TG	ddPCR	0.119508	iAR
SJNBL019414_G1	FALSE	NF1	I2710>NF	17	29687535	A	AACT	ddPCR	0.0030696	iAR
SJNBL019422_G1	FALSE	KMT2D	Q827fs	12	49444985	TTG	CC	Inference	0.106046	iAR
SJNBL041593_G1	FALSE	DNMT3A	S393_D394fs	2	25469587	TCA	T	Inference	0.00133441	iAR
SJNHL019447_G1	FALSE	KMT2D	A138fs	12	49448186	AGC	A	Inference	0.00498942	iAR
SJNHL019459_G1	FALSE	TET2	Q341fs	4	106156121	A	GC	ddPCR	0.00105434	iTR
SJNHL019493_G1	FALSE	PRDM1	H409fs	6	106553259	TC	T	Inference	0.0246419	iAR
SJNHL019497_G1	FALSE	BCOR	E1609fs	X	39913185	TC	T	Inference	0.00585787	iTR
SJNHL019499_G1	FALSE	TET2	Q1532fs	4	106196260	AC	A	ddPCR	0.0016464	iAR
SJNHL019806_G1	FALSE	TET2	K1317fs	4	106180922	A	AT	ddPCR	0.00658061	iTR
SJNHL042519_G1	FALSE	TET2	R1455_L1457fs	4	106193904	ATGTTAGC	T	Inference	0.00953184	iAR
SJNHL042746_G1	FALSE	DNMT3A	F752_W753fs	2	25463235	CAG	C	ddPCR	0.007127	iAR
SJNORM045067_G1	TRUE	TNFAIP3	F56fs	6	138192532	TT	GGGG	Inference	0.0174402	iAR
SJNORM045184_G1	TRUE	RAD21	Q452fs	8	117864302	TG	A	Inference	0.00568215	iAR
SJNORM045186_G1	TRUE	CREBBP	L1334fs	16	3790531	CAG	C	Inference	0.00547935	iAR
SJNORM045233_G1	TRUE	ASXL1	L696fs	20	31022603	A	GC	Inference	0.00244818	iAR
SJNORM045709_G1	TRUE	TET2	I274fs	4	106155920	TC	T	ddPCR	0.0012491	iAR
SJOS042105_G1	FALSE	ASXL1	S1428*	20	31024797	T	TAAA	Inference	0.0116113	iTR
SJRB018825_G1	FALSE	DNMT3A	R767fs	2	25463193	CT	C	ddPCR	0.00308707	iAR
SJRB018828_G1	FALSE	TET2	R96_T97fs	4	106155383	AACGCAC	GA	ddPCR	0.00155041	iAR
SJRHB018839_G1	FALSE	TET2	V1136_E1137fs	4	106158506	TAGGTA	T	ddPCR	0.0332374	iTR
SJRHB019581_G1	FALSE	TET2	D1042fs	4	106158222	TG	T	ddPCR	0.00189419	iAR
SJRHB042117_G1	FALSE	TNFAIP3	T97_G99fs	6	138192654	CGAACGGTAAGACTTGTT	C	Inference	0.00730282	iTR
SJSTS018861_G1	FALSE	ZRSR2	S196_S197>C	X	15833828	TCCA	T	Inference	0.00539892	iTR
SJSTS019610_G1	FALSE	CUX1	S518fs	7	101840243	TC	T	Inference	0.00194507	iTR
SJSTS042870_G1	FALSE	BRCA1	E1586fs	17	41223173	CT	C	Inference	0.00925658	iAR
SJWLM019638_G1	FALSE	TET2	Q632_N639fs	4	106156994	AAATGTACCAAGTTGAAATGAAT	A	Inference	0.0141254	iAR
SJEWS041985_G1	FALSE	TP53	S215R	17	7578204	A	C	ddPCR	0.00974421	iTR
SJWLM018906_G1	FALSE	GNAS	R416W	20	57429753	C	T	Inference	0.00672014	iAR
SJCNS001522_G1	FALSE	KRAS	Q61P	12	25380276	T	G	ddPCR	0.00336658	iTR
SJCNS041913_G1	FALSE	GNAS	R201H	20	57484421	G	A	ddPCR	0.00149905	iTR
SJNORM045248_G1	TRUE	JAK2	R228Q	9	5054631	G	A	Inference	0.0033292	iAR
SJHL019790_G1	FALSE	GNAS	R201H	20	57484421	G	A	ddPCR	0.00178784	iAR
SJOS042101_G1	FALSE	TP53	R175H	17	7578406	C	T	ddPCR	0.00147731	iAR
SJHL042037_G1	FALSE	RAD21	R586*	8	117859879	G	A	ddPCR	0.00126296	iAR
SJNPCA018728_G1	FALSE	KMT2D	R5153Q	12	49420291	C	T	Inference	0.00133304	iAR
SJALL041042_G1	FALSE	TET2	V1417F	4	106193787	G	T	ddPCR	0.00220706	iAR
SJNBL019439_G1	FALSE	GNAS	R201H	20	57484421	G	A	ddPCR	0.00140166	iAR
SJWLM041025_G1	FALSE	SDHA	A236T	5	228384	G	A	Inference	0.00168187	iAR
SJNBL018731_G1	FALSE	IDH2	G171D	15	90631841	C	T	Inference	0.00173833	iTR
SJALL018441_G1	FALSE	ASXL1	E705*	20	31022628	G	T	ddPCR	0.00678524	iAR
SJALL017884_G2	FALSE	TET2	Y1421*	4	106193801	C	G	ddPCR	0.00715657	iAR
SJALL018454_G1	FALSE	TET2	S1497L	4	106194028	C	T	Inference	0.00527506	iAR
SJALL018955_G1	FALSE	TET2	A1158V	4	106162559	C	T	Inference	0.0230195	iTR
SJALL018969_G1	FALSE	TET2	P1342S	4	106182985	C	T	Inference	0.00545007	iTR
SJALL019714_G1	FALSE	TET2	E1234*	4	106164832	G	T	ddPCR	0.0147843	iAR
SJHL019781_G1	FALSE	TET2	D1376N	4	106190848	G	A	ddPCR	0.00815584	iTR
SJNORM045709_G1	TRUE	TET2	R1214P	4	106164773	G	C	ddPCR	0.0210258	iAR
SJOS041007_G1	FALSE	TET2	G1370V	4	106190831	G	T	ddPCR	0.00707378	iTR
SJRB019555_G1	FALSE	TET2	Y1245*	4	106164867	C	A	Inference	0.0158826	iTR
SJHL041550_G1	FALSE	DNMT3A	Q534*	2	25467476	G	A	ddPCR	0.0526408	iTR
SJNBL019417_G1	FALSE	DNMT3A	W893*	2	25457209	C	T	ddPCR	0.0447876	iTR
SJNHL042086_G1	FALSE	DNMT3A	R771L	2	25463181	C	A	Inference	0.0353506	iAR
SJCNS041909_G1	FALSE	DNMT3A	R635P	2	25466799	C	G	ddPCR	0.0277449	iTR
SJALL018934_G1	FALSE	DNMT3A	D781H	2	25462066	C	G	ddPCR	0.0272001	iTR
SJHL019318_G1	FALSE	DNMT3A	G699S	2	25463587	C	T	Inference	0.0253195	iTR
SJSTS019608_G1	FALSE	DNMT3A	L566W	2	25467178	A	C	Inference	0.0322508	iAR
SJNORM045095_G1	TRUE	DNMT3A	L754H	2	25463232	A	T	ddPCR	0.0210494	iAR
SJNBL018757_G1	FALSE	DNMT3A	G679R	2	25464478	C	T	Inference	0.0211524	iAR
SJRHB042761_G1	FALSE	DNMT3A	K855*	2	25458610	T	A	ddPCR	0.0208707	iTR
SJWLM019635_G1	FALSE	DNMT3A	R659H	2	25464537	C	T	ddPCR	0.0189894	iAR
SJGCT018637_G1	FALSE	DNMT3A	V480M	2	25468925	C	T	Inference	0.0155953	iTR
SJGCT018626_G1	FALSE	DNMT3A	G308V	2	25470551	C	A	Inference	0.0155097	iTR
SJHL018658_G1	FALSE	DNMT3A	F868S	2	25457284	A	G	ddPCR	0.0146682	iTR
SJAML019101_G1	FALSE	DNMT3A	V897F	2	25457198	C	A	ddPCR	0.0146917	iTR
SJNHL018781_G1	FALSE	DNMT3A	P569L	2	25467169	G	A	Inference	0.0134276	iAR
SJNHL017924_G1	FALSE	DNMT3A	A575T	2	25467152	C	T	Inference	0.0116667	iTR
SJOS042096_G1	FALSE	DNMT3A	F731L	2	25463302	A	G	ddPCR	0.0112198	iTR
SJHL019348_G1	FALSE	DNMT3A	D747Y	2	25463254	C	A	ddPCR	0.0117637	iTR
SJALL018474_G1	FALSE	DNMT3A	L859*	2	25458597	A	C	ddPCR	0.0120527	iAR
SJALL018410_G1	FALSE	DNMT3A	A791V	2	25462035	G	A	Inference	0.010224	iTR
SJHL019280_G1	FALSE	DNMT3A	W297S	2	25470584	C	G	ddPCR	0.010114	iTR
SJALL041176_G1	FALSE	DNMT3A	Y735*	2	25463288	G	T	Inference	0.00947296	iTR
SJALL017883_G1	FALSE	DNMT3A	G332R	2	25470480	C	T	Inference	0.00894728	iAR
SJNORM045007_G1	TRUE	DNMT3A	L737R	2	25463283	A	C	ddPCR	0.00908114	iAR
SJHL018681_G1	FALSE	DNMT3A	L595P	2	25467091	A	G	Inference	0.00901933	iTR
SJNHL018769_G1	FALSE	DNMT3A	P457S	2	25469089	G	A	Inference	0.00883608	iAR
SJHL019285_G1	FALSE	DNMT3A	V296L	2	25470588	C	A	ddPCR	0.00967008	iTR
SJALL017881_G1	FALSE	DNMT3A	N838D	2	25458661	T	C	Inference	0.00842323	iTR
SJHL018659_G1	FALSE	DNMT3A	D768N	2	25463191	C	T	ddPCR	0.0085416	iTR
SJNBL019386_G1	FALSE	DNMT3A	F751V	2	25463242	A	C	ddPCR	0.0103857	iAR
SJNHL018775_G1	FALSE	DNMT3A	R604Q	2	25467064	C	T	Inference	0.00741095	iTR
SJALL044972_G1	FALSE	DNMT3A	D658N	2	25464541	C	T	ddPCR	0.00728764	iAR
SJSTS019607_G1	FALSE	DNMT3A	A910V	2	25457158	G	A	Inference	0.00697783	iAR
SJAML019100_G1	FALSE	DNMT3A	Y584*	2	25467123	G	C	Inference	0.00696754	iAR
SJRHB019587_G1	FALSE	DNMT3A	L295P	2	25470590	A	G	ddPCR	0.00646158	iTR
SJRB019815_G1	FALSE	DNMT3A	D702E	2	25463576	A	T	Inference	0.0064324	iTR
SJALL018443_G1	FALSE	DNMT3A	L547F	2	25467437	G	A	ddPCR	0.00655177	iAR
SJNORM045143_G1	TRUE	DNMT3A	G707C	2	25463563	C	A	ddPCR	0.00636943	iAR
SJHL018663_G1	FALSE	DNMT3A	L373R	2	25469924	A	C	Inference	0.00568874	iTR
SJRHB018839_G1	FALSE	DNMT3A	W601*	2	25467072	C	T	ddPCR	0.00533808	iTR

## Sheet: TableS7
iAR serial observations (54 pairs)									iTR serial observations (74 pairs)
Sample	Gene	AminoAcidChange	TimePoint1	TimePoint2	VAF1	VAF2	Growth direction		Sample	Gene	AminoAcidChange	TimePoint1	TimePoint2	VAF1	VAF2	Growth direction		Legend
SJALL017884	KRAS	A146V	40.79	41.02	4.40279	5.78809	expanding		SJALL018402	KRAS	L19F	44.25	46.57	0.150096	0.0866614	non-expanding		Sample		Sample ID
SJALL017884	TET2	Y1421*	40.79	41.02	0.715657	1.13598	expanding		SJALL018402	KRAS	L19F	46.57	48.27	0.0866614	0.185553	expanding		Gene		Gene symbol
SJALL018418	DNMT3A	D252fs	54.99	57.43	0.246742	0.507363	expanding		SJALL018402	KRAS	L19F	48.27	51.51	0.185553	0.0198551	non-expanding		AminoAcidChange		Amino acid change annotated by Annovar
SJALL018461	DNMT3A	R736H	43.22	47.28	0.464239	0.158448	non-expanding		SJALL018402	TET2	A277_Q278fs	44.25	46.57	0.419742	0.323786	non-expanding		TimePoint1		The earlier timepoint in two-timepoint serial pair. Unit: Age (yr) for iAR, Follow up (yr) for iTR
SJALL018499	KRAS	A146V	25.78	31.74	0.2457	0.215786	non-expanding		SJALL018402	TET2	A277_Q278fs	46.57	48.27	0.323786	0.325354	non-expanding		TimePoint2		The latter timepoint in two-timepoint serial pair. Unit: Age (yr) for iAR, Follow up (yr) for iTR
SJALL018935	IDH2	R140W	47.71	54.13	0.125337	0.0326105	non-expanding		SJALL018402	TET2	A277_Q278fs	48.27	51.51	0.325354	0.152631	non-expanding		VAF1		variane allele frequency at TimePoint1
SJALL019052	DNMT3A	R882H	26.12	31.91	0.264	0.527886	expanding		SJALL018408	DNMT3A	W860R	42.67	50.03	0.216643	0.445104	expanding		VAF2		variane allele frequency at TimePoint2
SJALL019092	ASXL1	R1415*	25.28	31.03	0.89389	0.145507	non-expanding		SJALL018925	TP53	V173M	45.68	48.5	1.52919	1.81125	expanding		Growth direction		clone trajectory direction during the serial observation
SJALL019092	ASXL1	R1415*	31.03	35.23	0.145507	0.0903478	non-expanding		SJALL018936	TP53	R248W	44.27	45.57	0.682153	0.711116	non-expanding
SJALL019718	TP53	R175H	37.56	43.01	0.162538	0.108533	non-expanding		SJALL018936	TP53	R273H	44.27	45.57	0.198232	0.1274	non-expanding
SJALL019731	DNMT3A	V704fs	34.36	40.03	0.463044	NotDetected	non-expanding		SJALL018936	TP53	R282W	44.27	45.57	0.257546	0.22471	non-expanding
SJALL041026	DNMT3A	R882H	49.46	53.48	0.348843	0.277211	non-expanding		SJALL018936	TP53	Y220C	44.27	45.57	0.252628	0.174352	non-expanding
SJALL041179	KRAS	L19F	49.51	56.23	1.25016	1.93229	expanding		SJALL018955	JAK2	V617F	40.2	44.24	0.863192	0.573849	non-expanding
SJALL041179	KRAS	L19F	56.23	60.45	1.93229	2.88289	expanding		SJALL018955	TET2	A1158V	40.2	44.24	2.30195	3.71824	expanding
SJALL041337	KRAS	V14I	28.42	34.27	0.132709	0.183419	non-expanding		SJALL018968	TET2	I274fs	36.28	38.38	0.112245	0.018524	non-expanding
SJALL041337	KRAS	V14I	34.27	38.44	0.183419	0.126219	non-expanding		SJALL019709	GNAS	R201H	40.4	45.64	0.151473	0.0934897	non-expanding
SJALL041384	BRCA2	L1715fs	24.5	29.79	2.7088	2.37523	non-expanding		SJALL019709	KRAS	A146V	40.4	45.64	0.110558	0.156546	non-expanding
SJALL041406	TP53	R175H	25.11	32.01	0.159884	0.166177	non-expanding		SJALL019716	TET2	R369fs	34.9	40.4	0.333884	0.489615	expanding
SJALL041851	KRAS	L19F	37.16	41.43	0.402612	0.0924543	non-expanding		SJALL019716	TET2	R369fs	40.4	44.41	0.489615	0.350199	non-expanding
SJALL041896	ASXL1	R693*	25.47	31.14	0.288551	0.154746	non-expanding		SJALL041172	CBL	R420Q	39.53	46.01	0.612397	0.682225	non-expanding
SJAML019109	DNMT3A	R882H	42.06	44.35	0.164339	0.129149	non-expanding		SJALL041172	CBL	R420Q	46.01	50.05	0.682225	0.348022	non-expanding
SJCNS018571	CBL	R420Q	28.59	31.7	0.156185	0.0125636	non-expanding		SJALL041203	KRAS	A146V	33.99	39.95	0.570828	1.72143	expanding
SJCNS018576	TP53	R175H	25.09	31.07	0.128467	0.0423517	non-expanding		SJALL041203	KRAS	A146V	39.95	44.07	1.72143	1.27709	non-expanding
SJCNS018588	TET2	R1214W	24.83	27.89	1.60071	0.159216	non-expanding		SJALL041347	TP53	R175H	24.12	29.82	0.134831	0.100747	non-expanding
SJCNS018588	TET2	R1214W	27.89	32.08	0.159216	0.0973047	non-expanding		SJALL041844	GNAS	R201H	40.02	44	0.200321	0.0493243	non-expanding
SJCNS019177	IDH2	R140Q	26.15	28.45	8.38918	8.71056	expanding		SJALL041845	JAK2	R683G	38.42	41.72	0.103074	0.142178	non-expanding
SJCNS019177	IDH2	R140Q	28.45	32.53	8.71056	9.54258	expanding		SJAML019102	TET2	Q70>Q*	34.14	36.21	0.677595	0.844999	expanding
SJCNS019766	NF1	R440*	25.96	31.47	0.414584	0.012955	non-expanding		SJAML019102	TET2	Q70>Q*	36.21	41.33	0.844999	1.04249	expanding
SJCNS019766	SF3B1	K666N	25.96	31.47	2.09037	6.61367	expanding		SJCNS001522	KRAS	Q61P	30.59	33.12	0.336658	0.381577	expanding
SJGCT018628	KRAS	L19F	35.81	39.04	0.119284	0.0736722	non-expanding		SJCNS019180	KRAS	G13C	17.63	19.97	0.427744	0.198821	non-expanding
SJGCT041512	DNMT3A	R729W	43.27	48.49	0.463058	0.389231	non-expanding		SJCNS019180	KRAS	G13C	19.97	24.49	0.198821	1	expanding
SJHL019295	DNMT3A	R320_A322fs	46.49	51.44	0.168587	0.0689619	non-expanding		SJCNS019180	TP53	R249T	17.63	24.49	1.49971	1.17045	non-expanding
SJHL019295	DNMT3A	R736H	46.49	51.44	0.2837	0.350473	non-expanding		SJCNS019184	PTPN11	R498W	16.67	19.47	0.282925	0.0800936	non-expanding
SJHL019790	GNAS	R201H	35.89	41.05	0.178784	0.0371136	non-expanding		SJCNS019184	TET2	I274fs	16.67	19.47	0.345261	1e-05	non-expanding
SJHL019790	TP53	R175H	35.89	41.05	0.250823	0.051644	non-expanding		SJEWS041506	DNMT3A	R882C	16.49	24.47	0.581271	0.198595	non-expanding
SJHL019790	TP53	R175H	41.05	45.42	0.051644	0.133247	expanding		SJEWS041506	DNMT3A	R882H	16.49	24.47	9.04364	10.9277	expanding
SJHL042010	CBL	P417L	31.13	32.91	0.149147	0.139572	non-expanding		SJGCT019235	BRCC3	E213K	16.86	21.93	0.210716	0.127324	non-expanding
SJNBL017916	STAT3	D661V	20.94	26.34	0.786118	0.229797	non-expanding		SJGCT019235	TP53	K120E	16.86	21.93	0.268954	0.182553	non-expanding
SJNBL017916	STAT3	D661V	26.34	30.48	0.229797	0.121449	non-expanding		SJHIST017902	KRAS	G13D	31.08	36.49	0.4452	0.139832	non-expanding
SJNBL018748	KRAS	A146P	27.44	29.56	0.218579	0.176991	non-expanding		SJHL018650	JAK2	V617F	42.34	43.64	0.521444	0.848056	expanding
SJNBL018754	KRAS	G60D	24.19	25.48	0.933238	1.05242	non-expanding		SJHL018658	DNMT3A	F868S	35.22	36.24	1.23855	1.46682	expanding
SJNBL018754	KRAS	G60D	25.48	29.65	1.05242	0.00701853	non-expanding		SJHL018663	DNMT3A	L373R	31.45	33.03	0.0342349	0.568874	expanding
SJNBL041593	DNMT3A	S393_D394fs	36.67	41.48	0.133441	0.0161577	non-expanding		SJHL018663	DNMT3A	L373R	33.03	37.66	0.568874	0.0320636	non-expanding
SJNBL041595	KRAS	L19F	30.46	35.47	0.436421	0.779692	expanding		SJHL018680	STAT3	Y640F	24.83	25.96	1.54227	0.281755	non-expanding
SJNHL019444	TP53	G262V	41.46	43.26	0.374785	0.661107	expanding		SJHL018680	STAT3	Y640F	25.96	27.72	0.281755	0.397966	expanding
SJNHL019462	KRAS	L19F	43.49	48.65	0.13382	0.0892567	non-expanding		SJHL018702	STAT3	Y640F	19.42	22.19	0.550315	1.53364	expanding
SJNHL019500	TP53	R175H	30.04	35.04	0.216169	0.136745	non-expanding		SJHL019258	TP53	C141Y	39.6	41.29	0.341713	0.616256	expanding
SJNHL041625	TP53	G245S	36.71	41.85	13.4586	13.7066	expanding		SJHL019258	TP53	C141Y	41.29	42.3	0.616256	0.341734	non-expanding
SJNHL042746	DNMT3A	F752_W753fs	32.75	37.92	0.7127	2.96148	expanding		SJHL019258	TP53	C141Y	42.3	43.66	0.341734	0.281174	non-expanding
SJRB018828	TET2	R96_T97fs	43.36	45.17	0.155041	0.0697046	non-expanding		SJHL019269	KRAS	G12S	37.43	40.5	0.239963	0.214906	non-expanding
SJRB019569	KRAS	L19F	20.2	25.44	0.310459	0.185128	non-expanding		SJHL019278	BRCA2	D1420_F1421del	34.42	36.64	0.459693	0.279406	non-expanding
SJRHB019591	GNAS	R201H	34.8	41.83	0.123745	0.0813835	non-expanding		SJHL019278	BRCA2	D1420_F1421del	36.64	41.28	0.279406	0.12289	non-expanding
SJSTS019836	DNMT3A	R736C	43.03	49.89	0.273973	0.0873193	non-expanding		SJHL019278	STAT3	Y640F	34.42	36.64	1.05367	0.313816	non-expanding
SJWLM019645	DNMT3A	P904L	43.12	46.07	0.122963	0.094063	non-expanding		SJHL019278	STAT3	Y640F	36.64	41.28	0.313816	0.188432	non-expanding
									SJHL019283	STAT3	Y640F	32.19	33.95	0.677927	0.307937	non-expanding
									SJHL019283	TP53	V218E	32.19	33.95	0.584095	0.860343	expanding
									SJHL019293	STAT3	Y640F	30.65	31.83	0.908428	0.998851	non-expanding
									SJHL019784	DNMT3A	G843fs	25.61	31.23	2.87449	3.2075	expanding
									SJHL019784	DNMT3A	G843fs	31.23	36	3.2075	3.89123	expanding
									SJHL042476	TP53	Y220C	8.9	16.04	0.251214	0.021173	non-expanding
									SJHL043129	TET2	Y1255_G1256fs	19.91	20.8	0.384585	0.544037	expanding
									SJHL043129	TET2	Y1255_G1256fs	20.8	21.14	0.544037	0.619261	non-expanding
									SJNBL018731	IDH2	G171D	38.76	40.96	0.173834	0.0957149	non-expanding
									SJNBL019411	DNMT3A	R882H	27.93	32.95	0.315053	0.548321	expanding
									SJNBL019427	KRAS	L19F	21.8	27.25	0.168622	0.100193	non-expanding
									SJNHL019459	TET2	Q341fs	31.76	35.41	0.105434	0.133202	expanding
									SJRB019555	TET2	Y1245*	45.17	47.27	1.58826	1.42636	non-expanding
									SJRB019555	TP53	Y220C	45.17	47.27	1.27961	0.890498	non-expanding
									SJRB041652	TET2	R1452*	32.1	37.31	25.9015	30.1772	expanding
									SJRHB019582	DNMT3A	R771*	31.87	37.19	0.738946	0.625674	non-expanding
									SJRHB041676	TET2	Q916*	37.26	42.58	0.165942	0.257749	expanding
									SJSTS019611	TET2	R1214W	25.2	26.79	0.126611	0.274848	expanding
									SJSTS019611	TET2	R1214W	26.79	27.83	0.274848	0.100503	non-expanding
									SJSTS019611	TET2	R1214W	27.83	31.87	0.100503	0.1324	non-expanding

## Sheet: TableS8
Sample	IsControl	AgeBloodDraw	AgeDiagnosis	Gender	Race	Diagnosis	Transplantation	IsCHPositive	Radiation	AlkylatingAgents	Platinums	Anthracycline	Bleomycin	Dactinomycin	Epipodophyllotoxins	Methotrexate	VincaAlkaloid	ProcarbazineExposure	PathogenicGermlineCancerPredispositionMutation	PathogenicGermlineDNADamageRepairMutation
SJALL018408_G1	FALSE	47.69	5.01635	Male	White	Acute lymphoblastic leukemia	none	TRUE	1640.36	29535.1	0	33.9506	0	0	0	2914.29	55.5556	N/A	-	-		Legend
SJALL018982_G1	FALSE	39.37	5.52877	Female	White	Acute lymphoblastic leukemia	none	FALSE	442.12	1853.57	0	115.06	0	0	1257.78	1821.91	28.2249	N/A	-	-		Sample						Sample ID
SJALL041245_G1	FALSE	38.86	8.78356	Male	White	Acute lymphoblastic leukemia	none	FALSE	328.74	2447.21	0	133.254	0	0	1618.18	2008.29	32.488	N/A	-	-		IsControl						True if the sample is control
SJALL018441_G1	FALSE	49.79	15.0279	Male	White	Acute lymphoblastic leukemia	none	TRUE	268.14	1841.38	0	114.368	0	0	1064.8	2199.65	17.3496	N/A	-	-		AgeBloodDraw						Age when the blood sample was collected
SJALL041244_G1	FALSE	34.92	4.65753	Female	White	Acute lymphoblastic leukemia	none	FALSE	442.12	1843.18	0	102.832	0	0	791.753	2167.64	19.0789	N/A	-	-		AgeDiagnosis						Age when the childhood cancer was diagnosed
SJALL018981_G1	FALSE	37.39	4.73425	Male	Black	Acute lymphoblastic leukemia	none	FALSE	442.12	1864.77	0	63.4615	0	5.37634	1109.49	2347.94	24.5921	N/A	-	-		Gender						Female or Male
SJALL041850_G1	FALSE	41.22	7.93425	Female	White	Acute lymphoblastic leukemia	none	FALSE	328.74	2097.06	0	130.588	0	0	657.944	1867.95	22.3529	N/A	-	-		Race						Black or White or Other
SJALL018440_G1	FALSE	45	10.1011	Male	White	Acute lymphoblastic leukemia	none	FALSE	328.74	1809.09	0	100.542	0	0	500	2098.22	20.9207	N/A	-	-		Diagnosis						Childhood cancer diagnosis
SJALL019712_G1	FALSE	39.55	1.58275	Male	Black	Acute lymphoblastic leukemia	none	FALSE	571.02	0	0	0	0	0	0	5902.75	6	N/A	MSH6_K543_E544fs	MSH6_K543_E544fs		Transplantation						Type of transplantation received. "none" if not received
SJALL018412_G1	FALSE	46.45	4.52551	Female	White	Acute lymphoblastic leukemia	none	FALSE	442.12	22612.1	0	0	0	0	0	2320.9	6.15385	N/A	-	-		IsCHPositive						True if CH mutation is identified
SJALL018436_G1	FALSE	42.42	6.3863	Male	White	Acute lymphoblastic leukemia	none	FALSE	475.6	300	0	50.6173	0	0	0	3587.74	12.1528	N/A	-	-		Radiation*						Estimated maximum radiation dose the active (blood producing) bone marrow received. The marrow distribution at AgeDiagnosis was used for estimation
SJALL018976_G1	FALSE	36.17	1.79063	Female	White	Acute lymphoblastic leukemia	none	FALSE	571.02	0	0	86	0	0	277.457	4558	16	N/A	-	-		Columns K to R (chemotherapy)*						Cummulative dose received per body surface for each drug
SJALL041231_G1	FALSE	49.92	18.3151	Male	White	Acute lymphoblastic leukemia	none	FALSE	268.14	0	0	70.3166	0	0	661.458	2841.78	7.3578	N/A	-	-		ProcarbazineExposure						True if exposed to procarbazine. N/A for survivors whose diagnosis is not Hodgkin lymphoma
SJALL019739_G1	FALSE	31.19	3.03595	Female	White	Acute lymphoblastic leukemia	none	FALSE	0	0	0	0	0	0	0	17533.3	5.08475	N/A	-	-		PathogenicGermlineCancerPredispositionMutation						Gemline mutations (pathogenic only) in cancer predisposition genes as reported in Wang et al. Formatted as GeneName_AminoAcidChange
SJALL041291_G1	FALSE	28.67	1.90411	Male	White	Acute lymphoblastic leukemia	none	TRUE	516.02	2833.87	0	120.635	0	0	1587.5	2480.36	6.66667	N/A	-	-		PathogenicGermlineDNADamageRepairMutation						Gemline mutations (pathogenic only) in DNA damage repair as reported in Qin et al. Formatted as GeneName_AminoAcidChange
SJALL041290_G1	FALSE	31.77	4.55616	Female	White	Acute lymphoblastic leukemia	none	FALSE	0	4075.95	0	181.013	0	0	1292.86	2151.38	5.97015	N/A	-	-
SJALL018461_G1	FALSE	43.22	14.4345	Female	White	Acute lymphoblastic leukemia	none	TRUE	207.54	4256.76	0	170.27	0	0	2238.63	1906.38	5.36913	N/A	-	-
SJALL044974_G1	FALSE	39.51	3.72678	Male	Other	Acute lymphoblastic leukemia	none	FALSE	0	0	0	0	0	0	0	1458.82	5.88235	N/A	-	-		* modified for survivors who received transplantation (see Treatment exposure analysis in main text for detail)
SJALL018442_G1	FALSE	37.02	2.2137	Female	White	Acute lymphoblastic leukemia	none	FALSE	681.02	0	0	0	0	0	4729.63	5116.91	5.45455	N/A	-	-
SJALL018987_G1	FALSE	41.72	7.7863	Male	White	Acute lymphoblastic leukemia	none	FALSE	0	0	0	0	0	0	0	17424.7	5.76923	N/A	-	-
SJALL042498_G1	FALSE	37.63	2.33699	Female	White	Acute lymphoblastic leukemia	none	FALSE	0	0	0	0	0	0	0	18415.8	5.55556	N/A	-	-
SJALL018986_G1	FALSE	40.87	7.19022	Male	White	Acute lymphoblastic leukemia	none	FALSE	0	0	0	0	0	0	0	18932.3	5.9322	N/A	-	-
SJALL041249_G1	FALSE	33.17	2.36164	Female	White	Acute lymphoblastic leukemia	none	FALSE	0	0	0	0	0	0	0	19021.6	5.55556	N/A	-	-
SJALL018990_G1	FALSE	42.4	4.60548	Female	White	Acute lymphoblastic leukemia	none	FALSE	442.12	12250	0	321.277	0	0	0	2455.29	77.5887	N/A	-	-
SJALL041255_G1	FALSE	36.03	4.75589	Female	White	Acute lymphoblastic leukemia	none	FALSE	337.12		0		0	0		0		N/A	-	-
SJALL041248_G1	FALSE	34.61	2.74209	Male	White	Acute lymphoblastic leukemia	none	FALSE	681.02	7843.37	0	208.537	0	0	0	19440.8	67.3675	N/A	-	FANCA_L358_Y359fs
SJALL041247_G1	FALSE	33.41	2.10137	Female	White	Acute lymphoblastic leukemia	none	FALSE	0	0	0	0	0	0	0	18524.1	5.66038	N/A	-	-
SJALL041254_G1	FALSE	33.42	4.38609	Female	White	Acute lymphoblastic leukemia	none	FALSE	337.12	12394.7	0	171.831	0	0	15049.7	3691.38	54.4444	N/A	-	-
SJALL041253_G1	FALSE	34.04	5.71781	Male	White	Acute lymphoblastic leukemia	none	TRUE	0	10202.7	0	255.963	0	0	5996.46	19494.6	84.1545	N/A	-	-
SJALL042619_G1	FALSE	38.85	2.99705	Female	White	Acute lymphoblastic leukemia	none	FALSE	0	0	0	0	0	0	0	18499	6.55738	N/A	-	-
SJALL041252_G1	FALSE	29.46	0.794521	Male	White	Acute lymphoblastic leukemia	none	FALSE	681.02	0	0	0	0	0	4539.58	4198.98	6.38298	N/A	-	-
SJALL041251_G1	FALSE	32.11	2.52329	Male	White	Acute lymphoblastic leukemia	none	FALSE	516.02	8459.65	0	184.483	0	0	2395.08	2051.6	5.66038	N/A	-	-
SJALL018443_G1	FALSE	37.84	3.73994	Male	White	Acute lymphoblastic leukemia	none	TRUE	337.12	6150.67	0	210.667	0	0	1276.62	2484.34	5.71429	N/A	-	-
SJALL041250_G1	FALSE	31.38	2.4137	Female	White	Acute lymphoblastic leukemia	none	FALSE	516.02	5338.33	0	200	0	0	1357.14	2341.49	5.35714	N/A	-	-
SJALL041851_G1	FALSE	37.16	4.73973	Male	White	Acute lymphoblastic leukemia	none	TRUE	337.12	3200	0	159.302	0	0	1152.33	1645.94	5	N/A	-	-
SJALL042657_G1	FALSE	33.7	2.05753	Male	White	Acute lymphoblastic leukemia	none	FALSE	681.02	0	0	0	0	0	4920.69	4756.9	5.17241	N/A	-	-
SJALL018988_G1	FALSE	41.22	7.54594	Female	White	Acute lymphoblastic leukemia	none	TRUE	0	0	0	0	0	0	0	16596.9	5.88235	N/A	-	-
SJALL041852_G1	FALSE	33.57	2.91507	Female	White	Acute lymphoblastic leukemia	none	FALSE	0	4043.48	0	0	0	0	253.623	11612.6	22.6895	N/A	-	-
SJALL041273_G1	FALSE	31.62	3.30959	Male	White	Acute lymphoblastic leukemia	none	FALSE	337.12	4200	0	180.822	0	0	1389.47	2310.35	11.2676	N/A	-	-
SJALL019733_G1	FALSE	31.73	3.30137	Male	White	Acute lymphoblastic leukemia	none	FALSE	337.12	4300	0	194.203	0	0	1811.59	2280.95	3.27869	N/A	-	-
SJALL041274_G1	FALSE	37.26	5.37388	Male	White	Acute lymphoblastic leukemia	none	FALSE	0	0	0	0	0	0	0	1445.9		N/A	-	-
SJALL019004_G1	FALSE	34.52	4.23836	Male	White	Acute lymphoblastic leukemia	none	FALSE	0	0	0	0	0	0	0	19206	5.55556	N/A	-	-
SJALL041289_G1	FALSE	32.38	5.6	Female	White	Acute lymphoblastic leukemia	none	FALSE	337.12	5121.95	0	182.927	0	0	1303.53	2374.27	4.16667	N/A	-	-
SJALL018997_G1	FALSE	47.36	15.0822	Male	White	Acute lymphoblastic leukemia	none	TRUE	268.14	0	0	393.333	0	0	8819.08	4430.36	30.9042	N/A	-	-
SJALL018453_G1	FALSE	45.19	12.4986	Male	White	Acute lymphoblastic leukemia	none	FALSE	0	0	0	0	0	0	0	18903.2	5.7377	N/A	-	-
SJALL041272_G1	FALSE	41.8	13.4606	Male	White	Acute lymphoblastic leukemia	none	FALSE	0	0	0	0	0	0	0	21595.2	6.01504	N/A	-	-
SJALL018996_G1	FALSE	37.76	5.50959	Male	White	Acute lymphoblastic leukemia	none	FALSE	370.6	10822.7	0	436.627	0	0	6079.31	823.963	68.603	N/A	-	-
SJALL018452_G1	FALSE	37.79	4.60451	Male	White	Acute lymphoblastic leukemia	none	FALSE	0	4141.58	0	0	0	0	4198.06	19120.7	44.8814	N/A	-	-
SJALL041267_G1	FALSE	33.42	6.07671	Female	White	Acute lymphoblastic leukemia	none	FALSE	0	0	0	0	0	0	0	18934.2	4.71698	N/A	-	-
SJALL019732_G1	FALSE	31.81	2.99726	Male	White	Acute lymphoblastic leukemia	none	FALSE	516.02	1500	0	180	0	0	1984.38	2218.75	6.45161	N/A	-	-
SJALL041269_G1	FALSE	39.49	10.9726	Female	White	Acute lymphoblastic leukemia	none	FALSE	0	0	0	0	0	0	0	18988.6	5.38462	N/A	-	-
SJALL041270_G1	FALSE	34.69	4.76895	Male	White	Acute lymphoblastic leukemia	none	FALSE	442.12	14441.1	0	206.494	0	0	17494.3	16340.3	104.015	N/A	BRCA2_A1689fs	BRCA2_A1689fs
SJALL041271_G1	FALSE	43.97	15.1507	Male	White	Acute lymphoblastic leukemia	none	FALSE	207.54	4117.65	0	182.439	0	0	1357.62	1228.59	3.65297	N/A	-	-
SJALL018444_G1	FALSE	35.91	4.59142	Female	White	Acute lymphoblastic leukemia	none	FALSE	337.12	4100	0	209.722	0	0	1360.53	2110.08	5.71429	N/A	-	-
SJALL018445_G1	FALSE	43.97	9.80216	Male	White	Acute lymphoblastic leukemia	none	FALSE	252.54	3441.67	0	185.714	0	0	1337.5	2275.2	5.9322	N/A	-	-
SJALL041257_G1	FALSE	42.51	12.1393	Female	White	Acute lymphoblastic leukemia	none	FALSE	0	0	0	0	0	0	0	19410.6	6.25	N/A	-	-
SJALL018992_G1	FALSE	40.54	7.77869	Female	White	Acute lymphoblastic leukemia	none	FALSE	252.54	4162.16	0	176.577	0	0	1348.11	858.725	6.06061	N/A	-	RAD51D_G258_L260fs
SJALL018983_G1	FALSE	36.98	3.15965	Male	White	Acute lymphoblastic leukemia	none	FALSE	1437.26	13419.1	0	344.786	0	0	7724.44	19109.9	117.996	N/A	-	-
SJALL042656_G1	FALSE	42.43	11.0259	Male	White	Acute lymphoblastic leukemia	none	FALSE	328.74	0	0	25.1337	0	0	903.226	2480.63	9.39597	N/A	-	-
SJALL018985_G1	FALSE	40.29	6.44384	Female	White	Acute lymphoblastic leukemia	none	FALSE	337.12	0	0	0	0	0	0	2482.93	30.9524	N/A	-	-
SJALL018954_G1	FALSE	39.71	1.10685	Female	White	Acute lymphoblastic leukemia	none	FALSE	1992.76	0	0	188.406	0	0	0	9681.03	32.6087	N/A	-	-
SJALL041199_G1	FALSE	39.38	4.50411	Male	White	Acute lymphoblastic leukemia	none	FALSE	1236.34	18343.1	0	0	0	0	0	2834.45	6.34921	N/A	-	-
SJALL019738_G1	FALSE	28.92	1.20274	Female	White	Acute lymphoblastic leukemia	none	FALSE	681.02	0	0	0	0	0	5140	4221.23	6.25	N/A	-	-
SJALL018454_G1	FALSE	34	1.8001	Female	Black	Acute lymphoblastic leukemia	none	TRUE	0	0	0	0	0	0	0	20292.2	5.66038	N/A	-	-
SJALL042618_G1	FALSE	38.98	2.97688	Female	White	Acute lymphoblastic leukemia	none	FALSE	516.02	4307.69	0	109.231	0	0	1350	2164.78	6.66667	N/A	-	-
SJALL017889_G1	FALSE	37.76	3.23632	Male	White	Acute lymphoblastic leukemia	none	FALSE	0	4293.18	0	0	0	0	6318.6	19643.9	32.2902	N/A	-	-
SJALL018984_G1	FALSE	33.6	1.29863	Male	White	Acute lymphoblastic leukemia	none	FALSE	0	0	0	0	0	0	0	83350	6.81818	N/A	-	-
SJALL041246_G1	FALSE	34.44	5.13425	Female	White	Acute lymphoblastic leukemia	none	FALSE	442.12	0	0	79.7468	0	0	1179.17	2433.76	12.6582	N/A	-	-
SJALL018446_G2	FALSE	34.5	2.28919	Female	White	Acute lymphoblastic leukemia	none	FALSE	516.02	13007.1	0	363.744	0	0	6325.35	1094.52	85.2338	N/A	-	-
SJALL018991_G1	FALSE	36.56	3.00227	Female	White	Acute lymphoblastic leukemia	none	FALSE	442.12	13266.9	0	177.5	0	0	16071.6	19939.2	73.0162	N/A	-	-
SJALL041256_G1	FALSE	31.29	3.07912	Male	White	Acute lymphoblastic leukemia	none	FALSE	0	0	0	0	0	0	0	19671.6	7.35294	N/A	-	-
SJALL019715_G1	FALSE	37.2	1.46849	Male	White	Acute lymphoblastic leukemia	none	TRUE	598.52	0	0	0	0	0	0	2235.34	5.35714	N/A	-	-
SJALL018420_G1	FALSE	43.51	3.62192	Female	White	Acute lymphoblastic leukemia	none	TRUE	442.12	0	0	0	0	0	0	2903.37	6.34921	N/A	-	-
SJALL018955_G1	FALSE	41.48	1.28219	Male	White	Acute lymphoblastic leukemia	none	TRUE	571.02	26533.3	0	0	0	0	0	2714.17	6.25	N/A	PALB2_W1038*	POLG_A467T
SJALL041200_G1	FALSE	39.11	4.71507	Female	White	Acute lymphoblastic leukemia	none	FALSE	459.62	0	0	0	0	0	0	2791.54	6.06061	N/A	-	-
SJALL017883_G1	FALSE	44.76	8.75616	Male	White	Acute lymphoblastic leukemia	none	TRUE	368.88	18140.4	0	0	0	0	0	4811.41	10.6386	N/A	-	-
SJALL019716_G1	FALSE	39.64	4.74247	Female	White	Acute lymphoblastic leukemia	none	TRUE	442.12	15972.5	0	0	0	0	0	1657.31	6.06061	N/A	-	-
SJALL041198_G1	FALSE	42.87	7.71781	Female	White	Acute lymphoblastic leukemia	none	FALSE	328.74	18980	0	0	0	0	0	1946.11	6.0241	N/A	-	-
SJALL018953_G1	FALSE	41.52	4.35616	Female	White	Acute lymphoblastic leukemia	none	TRUE	442.12	17998.6	0	0	0	0	0	1854.79	5.83942	N/A	-	-
SJALL018951_G1	FALSE	50.27	10.0164	Female	White	Acute lymphoblastic leukemia	none	FALSE	328.74	24112.3	0	0	0	0	0	2460.5	5.83333	N/A	-	-
SJALL017873_G1	FALSE	30.23	2.85209	Female	White	Acute lymphoblastic leukemia	none	FALSE	0	0	0	0	0	0	0	19488.4	5.17241	N/A	-	POLG_A467T
SJALL019003_G1	FALSE	38.4	7.73425	Male	White	Acute lymphoblastic leukemia	none	FALSE	0	0	0	0	0	0	0	20322.5	6	N/A	-	-
SJALL041288_G1	FALSE	32.83	5.34247	Male	White	Acute lymphoblastic leukemia	none	FALSE	0	0	0	0	0	0	0	20305.4	6.09756	N/A	-	-
SJALL041287_G1	FALSE	35.21	9.60822	Male	White	Acute lymphoblastic leukemia	none	FALSE	252.54	4200	0	179.487	0	0	1362.71	2274.13	3.6036	N/A	-	-
SJALL041286_G1	FALSE	29.97	2.80548	Female	Other	Acute lymphoblastic leukemia	none	TRUE	516.02	4200	0	198.305	0	0	1684.85	4074.87	6.77966	N/A	-	-
SJALL019002_G1	FALSE	38.06	7.17534	Male	White	Acute lymphoblastic leukemia	none	FALSE	442.12	0	0	0	0	0	4752.75	4652.01	5.68182	N/A	-	-
SJALL041284_G1	FALSE	31.74	4.21918	Male	White	Acute lymphoblastic leukemia	none	FALSE	337.12	4503.66	0	181.707	0	0	1518.07	2268.92	5.6338	N/A	-	-
SJALL041283_G1	FALSE	32.15	5.32603	Female	White	Acute lymphoblastic leukemia	none	FALSE	0	0	0	0	0	0	0	17273.7	6.57895	N/A	-	-
SJALL018999_G1	FALSE	41.45	9.85753	Female	White	Acute lymphoblastic leukemia	none	TRUE	0	0	0	0	0	0	0	19431.8	6.14035	N/A	-	-
SJALL018941_G1	FALSE	48.7	6.57169	Male	White	Acute lymphoblastic leukemia	none	FALSE	0	13737.5	0	0	0	0	0	1634.87	44.8276	N/A	-	-
SJNBL019383_G1	FALSE	41.73	0.0356164	Female	White	Neuroblastoma	none	FALSE	0	0	0	0	0	0	0	0	0	N/A	-	-
SJHL041532_G1	FALSE	51.32	14.3808	Male	White	Hodgkin lymphoma	none	FALSE	2537.82	14601	0	0	0	0	0	0	63.0573	TRUE	-	-
SJNBL019382_G1	FALSE	40.79	0.172603	Male	White	Neuroblastoma	none	FALSE	283.52	31500	0	0	0	0	0	0	126.667	N/A	-	-
SJHL019251_G1	FALSE	54.48	12.5644	Male	White	Hodgkin lymphoma	none	TRUE	3462.62	15486	0	0	0	0	0	0	39.5683	TRUE	-	-
SJALL018940_G1	FALSE	49.45	6.09041	Female	White	Acute lymphoblastic leukemia	none	TRUE	1681.66	22643.5	0	0	0	0	0	2298.92	5.74713	N/A	-	-
SJHL018652_G1	FALSE	47.26	4.88219	Male	Black	Hodgkin lymphoma	none	FALSE	1863.5	16373.6	0	0	0	0	0	0	70.7692	TRUE	-	-
SJWLM019632_G1	FALSE	44.55	4.15068	Male	White	Wilms tumor	none	FALSE	991.98	0	0	0	0	8.95522	0	0	53.7313	N/A	-	-
SJNBL017918_G1	FALSE	40.64	0.427397	Male	White	Neuroblastoma	none	FALSE	108.62	11511.8	0	0	0	0	0	0	41.1765	N/A	-	-
SJALL018410_G1	FALSE	48.65	6.09863	Female	White	Acute lymphoblastic leukemia	none	TRUE	1640.36	13316	0	0	0	0	0	1379.52	38.8235	N/A	-	-
SJHL018651_G1	FALSE	50.01	6.75972	Female	Black	Hodgkin lymphoma	none	TRUE	947.08	8530.61	0	0	0	0	0	0	42.8571	FALSE	-	-
SJHL041531_G1	FALSE	48.41	10.2215	Male	White	Hodgkin lymphoma	none	TRUE	2266.5	28031.5	0	0	0	0	0	0	71.1712	TRUE	-	-
SJGCT019219_G1	FALSE	43.7	1.79853	Female	Black	Germ cell tumor	none	TRUE	1988.94	35028.7	0	0	0	13.4615	0	0	59.6154	N/A	-	-
SJGCT017901_G1	FALSE	51.7	10.4356	Female	White	Germ cell tumor	none	FALSE	1322.38	2037.19	0	0	0	4.95868	0	0	33.0579	N/A	-	-
SJWLM019631_G1	FALSE	45.05	2.76766	Male	White	Wilms tumor	none	FALSE	673.58	0	0	0	0	10.3448	0	0	41.3793	N/A	-	-
SJHL041530_G1	FALSE	53.65	15.3863	Female	White	Hodgkin lymphoma	none	TRUE	2614.62	7770.83	0	0	0	0	0	0	9.02778	FALSE	-	-
SJNBL019381_G1	FALSE	44.28	0.542466	Male	Black	Neuroblastoma	none	FALSE	0	8993.75	0	0	0	0	0	0	43.75	N/A	-	-
SJCNS019122_G1	FALSE	50.46	8.17534	Male	White	Central nervous system (CNS)	none	FALSE	2646.42	9175.79	0	0	0	0	0	60	44.2105	N/A	-	-
SJALL041180_G1	FALSE	45.6	7.40822	Female	White	Acute lymphoblastic leukemia	none	FALSE	1689.06	22613.8	0	0	0	0	0	2316.28	52.381	N/A	-	-
SJALL041179_G1	FALSE	49.51	7.83836	Female	White	Acute lymphoblastic leukemia	none	TRUE	354.14		0	0	0	0	0	0		N/A	-	ERCC2_R112H
SJALL018937_G1	FALSE	48.53	6.19016	Female	White	Acute lymphoblastic leukemia	none	FALSE	1689.06	22142.9	0	0	0	0	0	2215.38	5.33333	N/A	-	-
SJALL018939_G1	FALSE	46.53	4.01644	Female	White	Acute lymphoblastic leukemia	none	FALSE	1689.06	22813.9	0	0	0	0	0	2171.62	47.1429	N/A	-	-
SJALL018938_G1	FALSE	43.63	1.41644	Male	White	Acute lymphoblastic leukemia	none	FALSE	1365.56	21584.8	0	0	0	0	0	2230.43	59.0909	N/A	-	-
SJHL019249_G1	FALSE	52.49	10.1853	Male	Black	Hodgkin lymphoma	none	TRUE	2841.34	16740.9	0	0	0	0	0	0	49.5868	TRUE	-	-
SJSTS018851_G1	FALSE	48.41	4.53699	Male	White	Soft tissue sarcoma	none	TRUE	0	6697.33	0	0	0	0	0	0	34.6667	N/A	-	ERCC6_Q156*
SJRHB043458_G1	FALSE	55.39	9.34704	Male	White	Rhabdomyosarcoma	none	FALSE	531.94	8278.98	0	0	0	7.82609	0	0	37.3913	N/A	-	-
SJWLM018881_G1	FALSE	45.37	2.72329	Male	White	Wilms tumor	none	FALSE	567.38	0	0	0	0	8.47458	0	0	50.8475	N/A	-	-
SJALL041176_G1	FALSE	42.01	3.29863	Female	White	Acute lymphoblastic leukemia	none	TRUE	1554.76	14019.7	0	32.5	0	0	0	1681.97	48.3333	N/A	-	-
SJALL018934_G1	FALSE	47.81	3.46301	Female	White	Acute lymphoblastic leukemia	none	TRUE	1689.06	17065.5	0	23.3871	0	0	0	2574.14	59.6774	N/A	-	-
SJHL018648_G1	FALSE	59.48	15.8466	Female	White	Hodgkin lymphoma	none	FALSE	1432.36	8276.5	0	0	0	0	0	0	25.3247	FALSE	-	-
SJHL018649_G1	FALSE	50.54	8.16164	Female	Black	Hodgkin lymphoma	none	FALSE	1330.78	10892.9	0	0	0	0	0	0	46.4286	TRUE	-	-
SJHL018650_G1	FALSE	51.46	7.81644	Female	White	Hodgkin lymphoma	none	TRUE	1167.52	7141.18	0	0	0	0	0	0	34.1176	FALSE	-	-
SJALL019711_G1	FALSE	54.32	13.4792	Female	Black	Acute lymphoblastic leukemia	none	FALSE	2066.82	27600	0	46.25	0	0	0	2597.65	46.875	N/A	-	-
SJALL018936_G1	FALSE	44.47	0.2	Male	White	Acute lymphoblastic leukemia	none	TRUE	1071.38	26420	0	0	0	0	0	2885.29	12.5	N/A	-	-
SJALL018409_G1	FALSE	48.48	6.39748	Male	White	Acute lymphoblastic leukemia	none	FALSE	442.12	17301.1	0	0	0	0	0	1610.55	49.3506	N/A	-	-
SJSTS018852_G1	FALSE	56.11	14.5151	Male	White	Soft tissue sarcoma	none	FALSE	0	14016.4	0	0	0	0	0	0	40.8333	N/A	-	-
SJALL018460_G1	FALSE	36.02	4.9726	Female	White	Acute lymphoblastic leukemia	none	FALSE	0	0	0	0	0	0	0	18222.4	4.65116	N/A	-	-
SJALL041853_G1	FALSE	32.85	3.74795	Female	White	Acute lymphoblastic leukemia	none	FALSE	337.12	4200	0	184.615	0	0	1318.84	2243.33	5	N/A	-	-
SJALL018959_G1	FALSE	42.22	3.05366	Male	White	Acute lymphoblastic leukemia	none	TRUE	1002.44	27016.4	0	0	0	0	0	3170.74	5.88235	N/A	-	-
SJALL019720_G1	FALSE	46.9	11.4198	Female	White	Acute lymphoblastic leukemia	none	FALSE	328.74	11682.9	0	0	0	0	0	1381.32	5.19481	N/A	-	-
SJALL018960_G1	FALSE	50.44	11.8986	Male	White	Acute lymphoblastic leukemia	none	FALSE	328.74	26271.7	0	0	0	0	0	2685.2	5.55556	N/A	-	-
SJALL017887_G1	FALSE	47.34	10.2164	Male	White	Acute lymphoblastic leukemia	none	TRUE	328.74	22681.7	0	0	0	0	0	2327.46	6.34921	N/A	-	-
SJALL018421_G1	FALSE	44.58	7.63595	Female	White	Acute lymphoblastic leukemia	none	FALSE	328.74	14870.2	0	0	0	0	0	1476.07	6.25	N/A	-	-
SJALL018427_G1	FALSE	37.18	2.05479	Male	White	Acute lymphoblastic leukemia	none	FALSE	681.02	0	0	50	0	0	0	2103.77	5.88235	N/A	-	-
SJALL018423_G1	FALSE	48.42	10.4235	Male	White	Acute lymphoblastic leukemia	none	FALSE	1826.72	24605	0	205.52	0	0	492.683	711.207	136.595	N/A	-	-
SJALL018424_G1	FALSE	44.48	6.53563	Female	White	Acute lymphoblastic leukemia	none	FALSE	442.12	0	0	48.2143	0	0	0	2914.88	5.95238	N/A	-	-
SJALL019723_G1	FALSE	36.25	3.02329	Female	White	Acute lymphoblastic leukemia	none	FALSE	442.12	0	0	50	0	0	0	3014.23	5.88235	N/A	-	-
SJAML019100_G1	FALSE	41.64	4.59028	Female	White	Acute myeloid leukemia	none	TRUE	0	7121.88	0	549.638	0	0	0	282.112	53.8731	N/A	-	-
SJALL041210_G1	FALSE	37.86	5.02577	Male	White	Acute lymphoblastic leukemia	none	FALSE	442.12	26887.4	0	165.233	0	0	1316.67	2800.79	140.869	N/A	-	-
SJALL041229_G1	FALSE	33.66	3.2411	Female	White	Acute lymphoblastic leukemia	none	FALSE	442.12	0	0	68.0856	0	0	660	3187.12	14.3694	N/A	-	-
SJALL041207_G1	FALSE	45.92	13.1994	Male	White	Acute lymphoblastic leukemia	none	FALSE	268.14	0	0	77.6224	0	0	815.789	4384.39	8.39161	N/A	-	-
SJAML041465_G1	FALSE	48.32	15.0431	Female	White	Acute myeloid leukemia	none	TRUE	0	6772.63	0	351.714	0	0	0	255.801	36.9231	N/A	-	-
SJALL041208_G1	FALSE	37.17	4.20219	Female	White	Acute lymphoblastic leukemia	none	FALSE	442.12	0	0	49.2424	0	0	0	2660.61	6.06061	N/A	-	FANCG_G494_E11splice
SJALL018964_G1	FALSE	40.24	2.43741	Male	White	Acute lymphoblastic leukemia	none	FALSE	681.02	0	0	51.8868	0	0	0	2866.51	5.66038	N/A	-	-
SJALL041209_G1	FALSE	36.54	3.4071	Male	White	Acute lymphoblastic leukemia	none	FALSE	442.12	0	0	50	0	0	0	2658.82	6.45161	N/A	-	-
SJALL041847_G1	FALSE	41.2	2.93866	Male	White	Acute lymphoblastic leukemia	none	FALSE	681.02	0	0	51.7241	0	0	0	2822.68	6.89655	N/A	-	-
SJALL019722_G1	FALSE	50.86	15.4536	Male	White	Acute lymphoblastic leukemia	none	FALSE	2237.02	0	0	75	0	0	1142.53	5152.01	7.31707	N/A	-	-
SJALL018962_G1	FALSE	40.3	3.90984	Male	White	Acute lymphoblastic leukemia	none	FALSE	442.12	13129.4	0	380.435	0	0	0	4457.89	58.9258	N/A	-	-
SJALL018963_G1	FALSE	46.64	5.67311	Female	White	Acute lymphoblastic leukemia	none	FALSE	0	0	0	0	0	0	0	0		N/A	-	-
SJALL044972_G1	FALSE	50.14	10.1063	Male	White	Acute lymphoblastic leukemia	none	TRUE	368.88	0	0	50.4202	0	0	0	3852.27	10.084	N/A	-	-
SJAML019099_G1	FALSE	45.76	8.11781	Female	White	Acute myeloid leukemia	none	FALSE	0	10108.6	0	276.923	0	0	0	60.5042	90.5262	N/A	-	-
SJALL019721_G1	FALSE	40.09	4.63014	Female	White	Acute lymphoblastic leukemia	none	FALSE	442.12	0	0	51.4286	0	0	0	2669.59	7.14286	N/A	-	-
SJALL041846_G1	FALSE	52.65	14.4548	Female	White	Acute lymphoblastic leukemia	none	FALSE	268.14	0	0	50.974	0	0	0	2378.34	5.19481	N/A	-	-
SJALL018422_G1	FALSE	50.41	12.474	Female	White	Acute lymphoblastic leukemia	none	FALSE	328.74	0	0	50	0	0	0	2635.91	4.96894	N/A	-	-
SJALL018961_G1	FALSE	45.97	8.81918	Male	White	Acute lymphoblastic leukemia	none	FALSE	1958.02	0	0	50	0	0	0	2848.15	10.9244	N/A	-	-
SJALL019744_G1	FALSE	32.41	4.74247	Female	Black	Acute lymphoblastic leukemia	none	FALSE	442.12	0	0	0	0	0	4653.57	3373.52	6.09756	N/A	-	-
SJALL017886_G1	FALSE	31.77	2.85185	Male	White	Acute lymphoblastic leukemia	none	FALSE	516.02	4200	0	179.104	0	0	1367.14	2975.45	5	N/A	-	XPA_L123fs
SJALL019012_G1	FALSE	29.51	1.8	Female	Black	Acute lymphoblastic leukemia	none	FALSE	0	5621.05	0	225.439	0	0	10426.2	11999.1	28.078	N/A	-	-
SJALL042661_G1	FALSE	31.46	3.56284	Male	White	Acute lymphoblastic leukemia	none	FALSE	337.12	10048.1	0	0	0	0	10357.7	2850.33	77.2308	N/A	-	-
SJALL018470_G1	FALSE	31.15	2.50942	Male	Black	Acute lymphoblastic leukemia	none	FALSE	1374.16	9769.35	0	0	0	0	15520.2	4288.52	62.2951	N/A	-	-
SJALL041307_G1	FALSE	40.42	13.8792	Male	White	Acute lymphoblastic leukemia	none	FALSE	268.14	9369.28	0	0	0	0	13674.2	2108.24	33.7181	N/A	-	-
SJALL018993_G1	FALSE	41.79	7.62568	Male	White	Acute lymphoblastic leukemia	none	TRUE	252.54	4301.08	0	181.522	0	0	2073.12	2287.62	5.61798	N/A	-	-
SJALL018468_G1	FALSE	34.83	4.71781	Female	White	Acute lymphoblastic leukemia	none	FALSE	337.12	4240	0	171.429	0	0	2584.02	2199.73	5.88235	N/A	-	-
SJALL041345_G1	FALSE	29.15	5.86948	Male	White	Acute lymphoblastic leukemia	none	FALSE	337.12	9697.5	0	25	0	0	14741.4	4864	45.679	N/A	-	-
SJALL042660_G1	FALSE	39.95	12.0164	Female	White	Acute lymphoblastic leukemia	none	FALSE	0	0	0	0	0	0	0	17898.2	5.78512	N/A	-	-
SJALL018489_G1	FALSE	33.96	6.53699	Female	White	Acute lymphoblastic leukemia	none	FALSE	0	10018	0	24.7059	0	0	16896.5	4155.29	57.6471	N/A	-	-
SJALL041038_G1	FALSE	32.59	3.54521	Female	White	Acute lymphoblastic leukemia	none	FALSE	337.12	10061.8	0	25	0	0	15612.5	4465.87	62.5	N/A	-	-
SJALL019033_G1	FALSE	44.85	17.4408	Male	White	Acute lymphoblastic leukemia	none	FALSE	207.54	9295.12	0	25	0	0	14551.8	4108.43	39.521	N/A	-	-
SJALL018487_G1	FALSE	34.05	6.10685	Female	White	Acute lymphoblastic leukemia	none	FALSE	0	9642.5	0	25	0	0	15070.9	5431.25	55	N/A	-	ERCC2_K274*
SJALL041337_G1	FALSE	28.42	4.52877	Male	Black	Acute lymphoblastic leukemia	none	TRUE	337.12	9835.71	0	38.4615	0	0	16632.9	4258.46	61.5385	N/A	-	-
SJALL041338_G1	FALSE	39.16	14.8055	Female	White	Acute lymphoblastic leukemia	none	FALSE	207.54	6076.77	0	25	0	0	9193.86	4095.27	43.5897	N/A	-	-
SJALL018488_G2	FALSE	39.05	15.4822	Female	White	Acute lymphoblastic leukemia	none	FALSE	207.54	4126.42	0	25	0	0	11060	4748.94	45.3333	N/A	-	-
SJALL041855_G1	FALSE	42.67	15.3562	Male	White	Acute lymphoblastic leukemia	none	FALSE	268.14	9385.8	0	24.6753	0	0	14565.5	4662.33	44.1558	N/A	-	-
SJALL041340_G1	FALSE	27.2	3.18356	Female	White	Acute lymphoblastic leukemia	none	FALSE	337.12	10095.6	0	25	0	0	15840.2	4247.06	58.8235	N/A	-	-
SJALL041339_G1	FALSE	25.34	2.34795	Male	White	Acute lymphoblastic leukemia	none	FALSE	516.02	7847.95	0	38.4058	0	0	10701.4	5164.88	47.8261	N/A	-	-
SJALL019030_G1	FALSE	31.11	2.51781	Male	White	Acute lymphoblastic leukemia	none	FALSE	0	9643.86	0	25.4545	0	0	15256.1	4635.44	56.3636	N/A	-	-
SJALL041343_G1	FALSE	26.74	3.81644	Male	White	Acute lymphoblastic leukemia	none	FALSE	337.12	10243.4	0	25	0	0	17975.4	4266.67	56.4103	N/A	-	-
SJALL019032_G1	FALSE	31.09	2.79452	Female	White	Acute lymphoblastic leukemia	none	FALSE	0	10253.3	0	24.5902	0	0	10118.4	4118.03	85.2459	N/A	-	-
SJALL041194_G1	FALSE	38.93	3.34247	Female	Black	Acute lymphoblastic leukemia	none	TRUE	442.12	0	0	0	0	0	0	2775.81	6.34921	N/A	-	-
SJALL041854_G1	FALSE	30.13	3.34521	Male	White	Acute lymphoblastic leukemia	none	FALSE	442.12	10078.1	0	26.0563	0	0	16599.4	4270.42	59.1549	N/A	-	-
SJALL041197_G1	FALSE	38.49	2.92055	Male	White	Acute lymphoblastic leukemia	none	FALSE	681.02	25943.9	0	0	0	0	0	2656.44	6.25	N/A	-	-
SJALL018952_G1	FALSE	47.74	7.65479	Male	White	Acute lymphoblastic leukemia	none	TRUE	328.74	14505	0	0	0	0	0	1464.8	6.25	N/A	-	-
SJALL042662_G1	FALSE	31.22	3.62842	Female	White	Acute lymphoblastic leukemia	none	FALSE	337.12	9555.41	0	0	0	0	12854.2	4235.62	51.3514	N/A	-	-
SJALL019714_G1	FALSE	41.23	4.95342	Male	White	Acute lymphoblastic leukemia	none	TRUE	442.12	0	0	0	0	0	0	2620.96	6.0241	N/A	-	-
SJALL018448_G1	FALSE	35.73	2.71332	Male	White	Acute lymphoblastic leukemia	none	FALSE	0	0	0	0	0	0	0	26180.4	6.55738	N/A	-	-
SJALL018447_G1	FALSE	41.46	8.03005	Male	White	Acute lymphoblastic leukemia	none	FALSE	0	0	0	0	0	0	0	17206.2	5.9322	N/A	-	-
SJALL018994_G1	FALSE	36.64	2.43141	Male	White	Acute lymphoblastic leukemia	none	FALSE	0	0	0	0	0	0	0	14298.4	6.06061	N/A	-	ERCC3_R425*
SJALL041181_G1	FALSE	40.34	3.09805	Male	White	Acute lymphoblastic leukemia	none	FALSE	442.12	18051.7	0	0	0	0	0	2660.32	60.3448	N/A	PMS2_Y255*	PMS2_Y255*
SJALL018943_G1	FALSE	55.41	12.9121	Female	White	Acute lymphoblastic leukemia	none	FALSE	268.14	0	0	0	0	0	0	3124.54	5.60748	N/A	-	-
SJALL018942_G1	FALSE	48.64	7.15027	Female	White	Acute lymphoblastic leukemia	none	FALSE	442.12	0	0	0	0	0	0	2614.88	5.88235	N/A	-	-
SJALL018411_G1	FALSE	44.43	3.7377	Female	White	Acute lymphoblastic leukemia	none	FALSE	1548.56	9423.88	0	0	0	0	0	1116.18	27.2727	N/A	-	-
SJALL041843_G1	FALSE	46.56	4.90101	Female	White	Acute lymphoblastic leukemia	none	FALSE	442.12	0	0	0	0	0	0	2821.21	6.25	N/A	-	-
SJALL041304_G1	FALSE	30.7	4.35342	Female	White	Acute lymphoblastic leukemia	none	FALSE	337.12	4200	0	152	0	0	1208.75	2149.51	5.6338	N/A	-	-
SJALL041303_G1	FALSE	37.54	10.8274	Male	White	Acute lymphoblastic leukemia	none	FALSE	328.74	0	0	0	0	0	4726.76	4267.47	5.6338	N/A	-	-
SJALL019011_G1	FALSE	33.36	3.82483	Male	White	Acute lymphoblastic leukemia	none	FALSE	1261.56	4293.1	0	0	0	0	6990.69	19673.5	37.6439	N/A	-	-
SJALL018469_G1	FALSE	38.25	8.32055	Male	White	Acute lymphoblastic leukemia	none	FALSE	0	0	0	0	0	0	0	17285.7	4.31034	N/A	-	-
SJALL019010_G1	FALSE	30.64	2.02192	Male	White	Acute lymphoblastic leukemia	none	FALSE	681.02	0	0	0	0	0	4600	8371.93	5.26316	N/A	-	-
SJALL041302_G1	FALSE	41.63	15.1362	Male	White	Acute lymphoblastic leukemia	none	FALSE	268.14	0	0	0	0	0	4575.76	4886.39	4.84848	N/A	-	SLX4_Q1386*
SJALL041305_G1	FALSE	31.67	4.80822	Female	White	Acute lymphoblastic leukemia	none	FALSE	0	0	0	0	0	0	0	19758.4	5.33333	N/A	-	-
SJALL019745_G1	FALSE	27.16	1.33699	Female	White	Acute lymphoblastic leukemia	none	TRUE	1341.76	5598.21	0	0	0	0	12908.3	2060.11	41.4707	N/A	-	-
SJALL019013_G1	FALSE	31.95	2.35342	Male	Black	Acute lymphoblastic leukemia	none	FALSE	681.02	0	0	0	0	0	5003.45	5072.3	6.89655	N/A	-	SLX4_S1363_G1364fs
SJALL041306_G1	FALSE	35.93	10.4327	Female	Black	Acute lymphoblastic leukemia	none	FALSE	252.54	10300	0	0	0	0	14039	3553.88	55.2846	N/A	-	-
SJALL042539_G1	FALSE	38.2	9.07671	Male	White	Acute lymphoblastic leukemia	none	FALSE	531.94	9663.44	0	35	0	0	15350.7	4168	51	N/A	-	FANCG_G494_E11splice
SJWLM019666_G1	FALSE	30.42	0.622951	Male	White	Wilms tumor	none	FALSE	0	0	0	186.957	0	8.69565	0	0	43.4783	N/A	-	-
SJWLM018895_G1	FALSE	33.88	3.08767	Male	White	Wilms tumor	none	FALSE	610.98	0	0	0	0	14.0625	0	0	35.9375	N/A	-	-
SJWLM018896_G1	FALSE	31.67	2.53973	Female	Black	Wilms tumor	none	FALSE	132.52	0	0	177.193	0	7.01754	0	0	36.8421	N/A	-	-
SJEWS018610_G1	FALSE	41.89	12.6427	Female	White	Ewing sarcoma family of tumors	none	FALSE	1507.56	9276.64	0	411.765	0	3.8835	0	0	14.5631	N/A	-	-
SJWLM019669_G2	FALSE	35.25	4.76356	Female	Black	Wilms tumor	none	FALSE	407.78	0	0	172.973	0	8.10811	0	0	40.5405	N/A	-	-
SJWLM019670_G1	FALSE	33.65	5.94247	Female	White	Wilms tumor	none	FALSE	431.12	0	425.882	124.051	0	2.53165	1417.65	0	18.9873	N/A	MSH6_R911*	MSH6_R911*
SJALL018458_G1	FALSE	39.93	10.6027	Male	White	Acute lymphoblastic leukemia	none	FALSE	328.74	8916.47	0	0	0	0	18825.6	5506.37	49.4605	N/A	-	-
SJALL041279_G1	FALSE	32.37	5.9516	Male	Black	Acute lymphoblastic leukemia	none	FALSE	442.12	0	0	0	0	0	4645.05	4651.43	5.55556	N/A	-	-
SJALL018457_G1	FALSE	34.73	3.06849	Female	White	Acute lymphoblastic leukemia	none	FALSE	0	0	0	0	0	0	0	19240	5.88235	N/A	-	-
SJALL017876_G1	FALSE	30.3	2.08525	Male	White	Acute lymphoblastic leukemia	none	FALSE	0	0	0	0	0	0	0	18861.4	6.25	N/A	-	-
SJALL019735_G1	FALSE	29.24	1.2137	Male	White	Acute lymphoblastic leukemia	none	FALSE	0	4344.83	0	192.982	0	0	1351.61	2527.45	5.76923	N/A	-	-
SJALL019001_G1	FALSE	35.91	3.42466	Male	White	Acute lymphoblastic leukemia	none	TRUE	337.12	13441	0	181.429	0	0	15893	3490.54	61.3263	N/A	-	-
SJALL018459_G1	FALSE	36.45	8.01096	Male	White	Acute lymphoblastic leukemia	none	FALSE	328.74	0	0	0	0	0	4957.14	3800.83	5.43478	N/A	-	-
SJALL041281_G1	FALSE	30.47	3.41644	Male	White	Acute lymphoblastic leukemia	none	FALSE	0	0	0	0	0	0	0	19032.6	5	N/A	-	-
SJALL019736_G1	FALSE	32.77	5.44919	Male	White	Acute lymphoblastic leukemia	none	FALSE	337.12	4421.05	0	185.263	0	0	1350	2332.58	5.68182	N/A	-	-
SJALL019737_G1	FALSE	31.74	4.22466	Female	White	Acute lymphoblastic leukemia	none	FALSE	0	0	0	0	0	0	0	18653.8	3.27869	N/A	-	-
SJALL042659_G1	FALSE	44.56	15.011	Female	White	Acute lymphoblastic leukemia	none	FALSE	0	0	0	0	0	0	0	17865.2	5.09554	N/A	-	-
SJALL018456_G1	FALSE	42.74	10.263	Female	White	Acute lymphoblastic leukemia	none	FALSE	1842.52	5355.29	0	0	0	0	7887.81	17960.6	32.092	N/A	-	-
SJALL019007_G1	FALSE	38.33	8.26849	Female	White	Acute lymphoblastic leukemia	none	FALSE	456.18	0	0	0	0	0	4601.05	4624.82	5.26316	N/A	-	-
SJALL019000_G1	FALSE	33.04	2.95068	Male	White	Acute lymphoblastic leukemia	none	FALSE	0	18690.2	0	291.139	0	0	14555.8	12556	96.9907	N/A	-	-
SJALL019734_G1	FALSE	33.84	5.22937	Female	White	Acute lymphoblastic leukemia	none	FALSE	337.12	4200	0	176	0	0	2150	2052.85	5.40541	N/A	-	-
SJALL041278_G1	FALSE	32.2	5.16156	Male	White	Acute lymphoblastic leukemia	none	FALSE	337.12	4200	0	180	0	0	1352.56	2078.87	7.14286	N/A	-	-
SJALL041277_G1	FALSE	28.48	1.91549	Female	White	Acute lymphoblastic leukemia	none	FALSE	681.02	0	0	0	0	0	4969.09	4314.09	5.45455	N/A	-	-
SJALL041022_G1	FALSE	36.1	2.7726	Female	White	Acute lymphoblastic leukemia	none	FALSE	681.02	0	0	0	0	0	3857.41	3321.52	5.66038	N/A	-	-
SJALL018455_G1	FALSE	34.79	2.26575	Male	White	Acute lymphoblastic leukemia	none	FALSE	0	12148.3	0	0	0	0	4035.48	4813.63	76.5139	N/A	-	-
SJALL041309_G1	FALSE	27.88	3.2864	Female	Black	Acute lymphoblastic leukemia	none	FALSE	337.12	7762.12	0	0	0	0	12322.7	4588.84	58.209	N/A	-	-
SJALL041296_G1	FALSE	31.44	4.56164	Male	White	Acute lymphoblastic leukemia	none	FALSE	370.6	14578.4	0	180.22	0	0	17197.4	2620.14	65.551	N/A	-	-
SJALL041297_G1	FALSE	28.18	2.85109	Female	White	Acute lymphoblastic leukemia	none	FALSE	1374.16	3716.9	0	0	0	0	6174.48	22692.9	37.8125	N/A	-	-
SJALL041298_G1	FALSE	31.75	4.50411	Male	White	Acute lymphoblastic leukemia	none	FALSE	0	0	0	0	0	0	0	19640.5	5.97015	N/A	-	-
SJALL041028_G1	FALSE	37.23	6.30685	Female	White	Acute lymphoblastic leukemia	none	FALSE	0	0	0	0	0	0	0	19630.2	6.0241	N/A	-	-
SJALL019008_G1	FALSE	32.91	2.85615	Male	White	Acute lymphoblastic leukemia	none	FALSE	540.32	12310	0	180.597	0	0	13587	2246.17	65.6621	N/A	-	-
SJALL041295_G1	FALSE	29.3	2.81254	Male	White	Acute lymphoblastic leukemia	none	FALSE	681.02	0	0	0	0	0	4446.55	6017.37	3.57143	N/A	-	-
SJALL041262_G1	FALSE	38.52	9.94842	Female	White	Acute lymphoblastic leukemia	none	FALSE	252.54	4069.37	0	180.909	0	0	1354.78	2363.26	5.55556	N/A	-	-
SJALL018450_G1	FALSE	44.14	10.9844	Female	White	Acute lymphoblastic leukemia	none	FALSE	0	10934.6	0	251.701	0	0	5941.78	17841.1	80.3855	N/A	-	-
SJALL018995_G1	FALSE	39.17	6.4719	Male	White	Acute lymphoblastic leukemia	none	FALSE	0	10088.3	0	0	0	0	15301.4	13373.4	60.3147	N/A	-	-
SJALL019742_G1	FALSE	30.88	3.92329	Male	White	Acute lymphoblastic leukemia	none	FALSE	0	0	0	0	0	0	0	19823.9	4.34783	N/A	-	-
SJALL041294_G1	FALSE	31.76	4.90959	Female	White	Acute lymphoblastic leukemia	none	FALSE	0	0	0	0	0	0	0	18478.4	5.71429	N/A	-	-
SJALL041027_G1	FALSE	37.55	5.7726	Female	White	Acute lymphoblastic leukemia	none	FALSE	0	0	0	0	0	0	0	17558.4	6.49351	N/A	-	-
SJALL041293_G1	FALSE	44.94	18.7687	Male	White	Acute lymphoblastic leukemia	none	FALSE	268.14	5438.55	0	50.6024	0	0	6393.98	8024.7	30.1205	N/A	-	-
SJALL041037_G1	FALSE	33.43	4.15068	Male	White	Acute lymphoblastic leukemia	none	FALSE	442.12	0	0	25	0	0	605	4259.46	62.1622	N/A	-	-
SJALL019009_G1	FALSE	34.93	5.12603	Female	White	Acute lymphoblastic leukemia	none	FALSE	1261.56	17171.8	0	0	0	0	8883.55	6905.97	83.1689	N/A	-	-
SJALL018464_G1	FALSE	34.71	3.89863	Male	White	Acute lymphoblastic leukemia	none	FALSE	337.12	4436.62	0	155.714	0	0	1400	2285.28	5.88235	N/A	-	-
SJALL018465_G1	FALSE	32.04	1.70959	Male	White	Acute lymphoblastic leukemia	none	FALSE	0	9882.86	0	0	0	0	15107.9	22366.4	65.7222	N/A	-	-
SJALL019727_G1	FALSE	32.84	3.39466	Male	White	Acute lymphoblastic leukemia	none	FALSE	337.12	4038.46	0	169.231	0	0	1757.83	2488.94	5.71429	N/A	-	-
SJALL041263_G1	FALSE	35.37	7.9344	Male	White	Acute lymphoblastic leukemia	none	FALSE	252.54	4306.06	0	168.687	0	0	1342.31	2296.87	6.74157	N/A	-	-
SJALL042658_G1	FALSE	33.94	3.28257	Female	White	Acute lymphoblastic leukemia	none	FALSE	0	0	0	0	0	0	0	18948.4	6.77966	N/A	-	-
SJALL017882_G1	FALSE	31.07	3.65753	Male	Black	Acute lymphoblastic leukemia	none	FALSE	0	0	0	0	0	0	0	19348.9	5.6338	N/A	-	-
SJALL041260_G1	FALSE	33.04	2.91039	Male	White	Acute lymphoblastic leukemia	none	FALSE	0	8955.95	0	0	0	0	8431.44	27073.2	81.645	N/A	-	-
SJALL018449_G1	FALSE	36.97	3.23642	Female	White	Acute lymphoblastic leukemia	none	FALSE	0	0	0	0	0	0	0	18555.1	6.66667	N/A	-	-
SJALL041347_G1	FALSE	38	13.8781	Female	White	Acute lymphoblastic leukemia	none	TRUE	1430.52	17313.1	0	50.3425	0	0	4415.35	8340.42	97.2603	N/A	-	-
SJALL019035_G1	FALSE	33.52	6.44384	Male	White	Acute lymphoblastic leukemia	none	FALSE	442.12	9580.72	0	24.4048	0	0	15216.2	5493.29	51.1905	N/A	-	-
SJALL041040_G1	FALSE	42.69	14.0121	Female	White	Acute lymphoblastic leukemia	none	FALSE	207.54	7377.92	0	24.5098	0	0	11323.1	4101.96	41.8301	N/A	-	-
SJALL041349_G1	FALSE	26.78	3.63014	Female	White	Acute lymphoblastic leukemia	none	FALSE	442.12	8814.71	0	48.5714	0	0	14220.6	4211.01	38.5714	N/A	-	-
SJALL041350_G1	FALSE	25.9	3.94247	Female	White	Acute lymphoblastic leukemia	none	FALSE	0	10451.4	0	24.6377	0	0	16203.5	4752.47	60	N/A	-	-
SJALL018490_G1	FALSE	28.71	1.43288	Male	White	Acute lymphoblastic leukemia	none	TRUE	0	10189.3	0	24.5455	0	0	16928.6	4116.36	54.5455	N/A	-	-
SJALL018491_G1	FALSE	34.51	6.98082	Female	White	Acute lymphoblastic leukemia	none	FALSE	337.12	8236.56	0	38.7097	0	0	13488.7	4245.16	56.9892	N/A	-	-
SJALL041351_G1	FALSE	27.02	4.05753	Male	Black	Acute lymphoblastic leukemia	none	FALSE	337.12	10422.1	0	25.3425	0	0	17530.3	4291.01	58.9041	N/A	-	-
SJWLM042768_G1	FALSE	32.17	4.19423	Male	White	Wilms tumor	none	FALSE	780.58	0	0	200	0	7.14286	0	0	35.7143	N/A	-	-
SJWLM018894_G1	FALSE	29.51	1.0545	Female	White	Wilms tumor	none	FALSE	118.76	0	0	52.1739	0	1.17391	0	0	21.7391	N/A	WT1_Q238*	-
SJNBL019410_G1	FALSE	29.19	0.295486	Male	White	Neuroblastoma	none	FALSE	101.42	1050	743.243	35.1351	0	0	829.73	0	0	N/A	-	-
SJEWS018608_G1	FALSE	38.41	8.90597	Male	White	Ewing sarcoma family of tumors	none	FALSE	851.84	12043	0	372.043	0	10.6383	0	0	8.51064	N/A	-	-
SJOS019526_G1	FALSE	40.18	10.0291	Male	White	Osteosarcoma	none	FALSE	0	6000	400	380	149.474	6.31579	0	144000	0	N/A	-	-
SJWLM019665_G1	FALSE	35.1	5.79073	Female	White	Wilms tumor	none	FALSE	634.36	0	0	175.581	0	8.13953	0	0	38.3721	N/A	-	-
SJEWS019205_G1	FALSE	46.79	16.7982	Female	White	Ewing sarcoma family of tumors	none	FALSE	434.14	10500	0	384.768	0	6.32911	0	0	11.3924	N/A	-	-
SJEWS018609_G1	FALSE	35.87	6.55152	Male	White	Ewing sarcoma family of tumors	none	TRUE	952.68	11325	0	342.063	0	10.5263	0	0	18.797	N/A	-	-
SJOS018809_G1	FALSE	46.75	17.1975	Female	White	Osteosarcoma	none	TRUE	0	5700	400	380	60	5.625	0	120000	0	N/A	-	-
SJWLM042769_G1	FALSE	26.99	0.29235	Male	Black	Wilms tumor	none	FALSE	0	0	0	0	0	6.45161	0	0	25.8065	N/A	-	-
SJHL019305_G1	FALSE	43.66	14.4248	Female	White	Hodgkin lymphoma	none	FALSE	1802.02	5547.74	0	194.578	45.1807	0	0	0	63.7581	TRUE	-	-
SJWLM019667_G1	FALSE	33.74	4.53832	Male	Black	Wilms tumor	none	FALSE	965.86	0	447.275	275	0	12.1319	1490.06	0	53.7149	N/A	-	-
SJEWS018611_G1	FALSE	45.54	18.1479	Female	White	Ewing sarcoma family of tumors	none	FALSE	0	11541	0	386.55	0	7.01754	0	0	12.8655	N/A	-	-
SJALL019753_G1	FALSE	44.24	20.1425	Female	Black	Acute myeloid leukemia	none	FALSE	0	3444.89	0	269.721	0	0	5108.79	67.0391	18.8235	N/A	-	-
SJALL019713_G1	FALSE	42.07	4.32055	Male	White	Acute lymphoblastic leukemia	none	FALSE	442.12	0	0	0	0	0	0	1656.76	8.21918	N/A	-	-
SJALL041234_G1	FALSE	35.92	3.31233	Male	White	Acute lymphoblastic leukemia	none	FALSE	372.12	0	0	75.5738	0	0	281.69	3821.11	9.6799	N/A	MAP2K1_D67N	-
SJALL018432_G1	FALSE	38	3.31233	Male	White	Acute lymphoblastic leukemia	none	FALSE	1508.76	14311.1	0	50	0	0	0	2230.13	51.4974	N/A	-	-
SJALL041232_G1	FALSE	34.62	3.14795	Female	White	Acute lymphoblastic leukemia	none	FALSE	1794.06	0	0	75.3012	0	0	662.651	2053.94	18.5938	N/A	-	-
SJALL018433_G1	FALSE	36.83	2.32055	Male	White	Acute lymphoblastic leukemia	none	FALSE	0	0	0	51.4598	0	0	657.895	2447.37	9.17241	N/A	-	-
SJALL018974_G1	FALSE	40.63	4.18904	Female	White	Acute lymphoblastic leukemia	none	FALSE	442.12	0	0	86.1472	0	0	576.623	2785.4	9.95671	N/A	-	-
SJALL018975_G1	FALSE	40.36	5.54991	Female	White	Acute lymphoblastic leukemia	none	FALSE	1993.36	747.656	0	75.1938	0	0	663.566	1955.24	15.375	N/A	-	-
SJALL041186_G1	FALSE	50.6	13.0493	Female	White	Acute lymphoblastic leukemia	none	FALSE	268.14	19591.8	0	0	0	0	0	2026.66	6.25	N/A	-	-
SJALL018418_G1	FALSE	54.99	14.3479	Female	White	Acute lymphoblastic leukemia	none	TRUE	268.14	0	0	0	0	0	0	2580.13	5.71429	N/A	-	-
SJALL018414_G1	FALSE	44.16	3.17867	Female	White	Acute lymphoblastic leukemia	none	FALSE	442.12	17269.2	0	0	0	0	0	1887.39	6.25	N/A	-	-
SJALL041185_G1	FALSE	40.35	3.80328	Male	White	Acute lymphoblastic leukemia	none	FALSE	459.62	0	0	0	0	0	0	2816.14	6.25	N/A	-	-
SJALL018944_G1	FALSE	61.61	19.4805	Female	White	Acute lymphoblastic leukemia	none	TRUE	268.14	0	0	0	0	0	0	2617.63	6.04027	N/A	-	-
SJALL041016_G1	FALSE	46.68	6.86027	Male	White	Acute lymphoblastic leukemia	none	FALSE	1183.84	12465.8	0	0	0	0	0	1326.84	5.88235	N/A	-	-
SJALL018948_G1	FALSE	44.96	5.12222	Female	White	Acute lymphoblastic leukemia	none	FALSE	442.12	0	0	0	0	0	0	2578.58	5.71429	N/A	-	-
SJALL018949_G1	FALSE	49.47	9.01028	Female	White	Acute lymphoblastic leukemia	none	FALSE	354.14	17451.4	0	0	0	0	0	1806.48	5.55556	N/A	-	-
SJALL018965_G1	FALSE	48.21	7.47798	Male	White	Acute lymphoblastic leukemia	none	FALSE	55.6	5617.97	0	312.903	0	0	0	0		N/A	-	-
SJALL041213_G1	FALSE	44.81	12.3388	Female	White	Acute lymphoblastic leukemia	none	FALSE	328.74	0	0	50	0	0	0	2820.41	5.33333	N/A	-	-
SJALL041182_G1	FALSE	54.36	16.5686	Male	White	Acute lymphoblastic leukemia	none	TRUE	268.14	13882	0	0	0	0	0	1551.96	4.7619	N/A	-	-
SJALL041193_G1	FALSE	40.4	4.52603	Female	White	Acute lymphoblastic leukemia	none	FALSE	459.62	0	0	0	0	0	0	2646.67	6.55738	N/A	-	-
SJALL018950_G1	FALSE	44.02	4.47123	Female	White	Acute lymphoblastic leukemia	none	TRUE	442.12	23485.5	0	0	0	0	0	2406.98	5.7971	N/A	-	-
SJALL042545_G1	FALSE	43.92	2.5726	Male	White	Acute lymphoblastic leukemia	none	FALSE	736.02	21803.6	0	0	0	0	0	2239.68	7.14286	N/A	-	-
SJALL041187_G1	FALSE	38.37	2.05205	Female	White	Acute lymphoblastic leukemia	none	FALSE	708.52	0	0	0	0	0	0	2617.14	6	N/A	-	-
SJALL041192_G1	FALSE	38.14	2.54247	Female	White	Acute lymphoblastic leukemia	none	FALSE	681.02	19418.5	0	0	0	0	0	2001.85	5.76923	N/A	-	-
SJALL018462_G1	FALSE	39.83	8.54521	Female	White	Acute lymphoblastic leukemia	none	FALSE	252.54	7697.49	0	172.414	0	0	4022.5	1474.53	20.0543	N/A	-	-
SJALL017870_G1	FALSE	38.17	5.09959	Male	White	Acute lymphoblastic leukemia	none	FALSE	442.12	0	0	47.2603	0	0	0	2534.65	9.58904	N/A	-	-
SJALL018425_G1	FALSE	41.53	4.0765	Female	White	Acute lymphoblastic leukemia	none	FALSE	442.12	0	0	50.7692	0	0	0	2334.33	6.06061	N/A	-	-
SJALL017869_G1	FALSE	34.94	1.87766	Female	White	Acute lymphoblastic leukemia	none	FALSE	1231.02	1208.11	0	151.042	0	0	14451.3	3017.27	78.8743	N/A	-	-
SJALL019718_G1	FALSE	37.56	2.45976	Male	White	Acute lymphoblastic leukemia	none	TRUE	708.52	0	0	0	0	0	0	2448.79	6.89655	N/A	-	-
SJALL019719_G1	FALSE	40.32	4.38356	Male	White	Acute lymphoblastic leukemia	none	FALSE	477.12	0	0	0	0	0	0	2761.66	5.88235	N/A	-	-
SJALL041203_G1	FALSE	40.02	6.03288	Male	White	Acute lymphoblastic leukemia	none	TRUE	0	26687.6	0	0	0	0	0	2729.41	5.55556	N/A	-	-
SJALL041204_G1	FALSE	39.5	5.30959	Female	White	Acute lymphoblastic leukemia	none	FALSE	442.12	0	0	0	0	0	0	2652.65	6.66667	N/A	-	-
SJALL018957_G1	FALSE	45	5.7726	Female	White	Acute lymphoblastic leukemia	none	FALSE	477.12	22314.7	0	0	0	0	0	2297.07	6.75676	N/A	-	-
SJALL041205_G1	FALSE	36.42	2.57787	Male	White	Acute lymphoblastic leukemia	none	FALSE	681.02	0	0	0	0	0	0	2759.38	6.45161	N/A	-	-
SJALL018958_G1	FALSE	50.17	11.5479	Male	White	Acute lymphoblastic leukemia	none	FALSE	328.74	0	0	0	0	0	0	2873.82	5.82524	N/A	-	-
SJALL018416_G1	FALSE	43.71	3.17534	Male	White	Acute lymphoblastic leukemia	none	FALSE	442.12	0	0	0	0	0	0	2644.62	6.15385	N/A	-	-
SJALL041191_G1	FALSE	39.9	4.03014	Male	White	Acute lymphoblastic leukemia	none	FALSE	442.12	0	0	0	0	0	0	2596.99	6.57895	N/A	-	-
SJALL041845_G1	FALSE	48.48	6.75616	Male	White	Acute lymphoblastic leukemia	none	TRUE	477.12	19878.3	0	0	0	0	0	2047.25	6.25	N/A	-	-
SJALL018947_G1	FALSE	56.07	15.326	Male	White	Acute lymphoblastic leukemia	none	FALSE	268.14	0	0	0	0	0	0	2540.12	6.25	N/A	-	-
SJALL018417_G1	FALSE	45.22	4.97969	Female	White	Acute lymphoblastic leukemia	none	FALSE	2091.56	11694.6	0	0	0	0	0	1696.16	5.47945	N/A	-	-
SJALL019717_G1	FALSE	51.22	15.5781	Female	White	Acute lymphoblastic leukemia	none	TRUE	268.14	25155	0	0	0	0	0	2561.92	4.93827	N/A	-	-
SJALL041202_G1	FALSE	36.97	2.83362	Female	White	Acute lymphoblastic leukemia	none	FALSE	736.02	24796.6	0	0	0	0	0	2531.19	6.77966	N/A	-	-
SJALL041190_G1	FALSE	41.98	5.7863	Male	White	Acute lymphoblastic leukemia	none	FALSE	477.12	0	0	0	0	0	0	2057.41	6.41026	N/A	-	-
SJALL041189_G1	FALSE	38.52	2.55616	Female	White	Acute lymphoblastic leukemia	none	FALSE	681.02	0	0	0	0	0	0	2503.33	5.76923	N/A	-	-
SJALL041844_G1	FALSE	42.25	2.23288	Female	White	Acute lymphoblastic leukemia	none	TRUE	708.52	13379.6	0	0	0	0	0	2037.04	35.1852	N/A	-	BRIP1_Y800*
SJALL018945_G1	FALSE	49.75	8.97894	Male	White	Acute lymphoblastic leukemia	none	FALSE	328.74	14538	0	0	0	0	0	2563.33	4.6729	N/A	-	-
SJALL018956_G1	FALSE	41.47	3.09315	Male	White	Acute lymphoblastic leukemia	none	FALSE	459.62	0	0	172.414	0	0	0	9517.32	18.0516	N/A	-	-
SJALL042617_G1	FALSE	46.64	6.32241	Female	White	Acute lymphoblastic leukemia	none	FALSE	442.12	23821.2	0	166.667	0	0	0	7170.76	18.2963	N/A	-	-
SJALL041196_G1	FALSE	37.59	2.64932	Male	White	Acute lymphoblastic leukemia	none	FALSE	681.02	20122	0	0	0	0	0	2078.05	7.54717	N/A	-	-
SJALL041195_G1	FALSE	39.86	4.47945	Female	White	Acute lymphoblastic leukemia	none	TRUE	442.12	19451.5	0	0	0	0	0	1967.9	6.55738	N/A	-	-
SJALL018419_G1	FALSE	55.06	15.4301	Female	White	Acute lymphoblastic leukemia	none	FALSE	268.14	0	0	0	0	0	0	2363.93	5.16129	N/A	-	-
SJALL041183_G1	FALSE	39.49	2.82601	Male	White	Acute lymphoblastic leukemia	none	FALSE	681.02	18007.2	0	0	0	0	0	1859.72	6.06061	N/A	-	-
SJALL041184_G1	FALSE	38.9	2.89718	Male	White	Acute lymphoblastic leukemia	none	FALSE	681.02	11577	0	0	0	0	0	1377.05	10	N/A	-	-
SJALL018413_G1	FALSE	44.56	3.11076	Female	White	Acute lymphoblastic leukemia	none	FALSE	442.12	0	0	0	0	0	0	2670.96	5.6338	N/A	-	-
SJALL042654_G1	FALSE	48.29	8.87233	Male	White	Acute lymphoblastic leukemia	none	TRUE	354.14	20192	0	0	0	0	0	2039.04	6.12245	N/A	-	-
SJALL017881_G1	FALSE	41.56	3.31386	Male	White	Acute lymphoblastic leukemia	none	TRUE	442.12	11094.6	0	0	0	0	0	1236.49	5.6338	N/A	-	-
SJALL018428_G1	FALSE	38.79	2.97808	Female	White	Acute lymphoblastic leukemia	none	FALSE	1710.76	0	0	0	0	0	0	2980.46	54.3192	N/A	-	-
SJALL018439_G1	FALSE	38.94	4.02192	Male	White	Acute lymphoblastic leukemia	none	FALSE	475.6	5943.96	0	177.684	0	0	2015.66	2462.15	42.76	N/A	-	-
SJALL018989_G1	FALSE	46.48	12.8986	Female	White	Acute lymphoblastic leukemia	none	FALSE	207.54	6314.69	0	209.79	0	0	1384.62	2370.98	5.71429	N/A	-	-
SJALL041220_G1	FALSE	33.9	2.47397	Female	White	Acute lymphoblastic leukemia	none	FALSE	681.02	0	0	50	0	0	0	2951.45	6.45161	N/A	-	POLG_A467T
SJALL042655_G1	FALSE	40.23	5.05635	Male	White	Acute lymphoblastic leukemia	none	FALSE	0	0	0	0	0	0	0	2540	11	N/A	-	-
SJALL041221_G1	FALSE	36.59	3.83836	Female	White	Acute lymphoblastic leukemia	none	FALSE	442.12	0	0	50.7937	0	0	0	2488.57	7.40741	N/A	-	-
SJALL018971_G1	FALSE	51.78	14.8685	Female	White	Acute lymphoblastic leukemia	none	FALSE	268.14	0	0	49.0683	0	0	0	2414.96	4.96894	N/A	-	-
SJALL018435_G1	FALSE	44.83	9.33149	Female	Black	Acute lymphoblastic leukemia	none	FALSE	328.74	895.42	0	74.688	0	0	659.701	2589.18	15.1603	N/A	-	-
SJALL041236_G1	FALSE	35.73	4.68767	Female	White	Acute lymphoblastic leukemia	none	FALSE	442.12	300	0	62.5	0	0	660.87	2660.26	9.50292	N/A	-	BRCA1_E23fs
SJALL018437_G1	FALSE	38.32	5.01644	Male	White	Acute lymphoblastic leukemia	none	FALSE	22.12	900	0	75.7895	0	0	891.579	2476.23	13.9588	N/A	-	-
SJALL018973_G1	FALSE	51.49	15.2795	Male	White	Acute lymphoblastic leukemia	none	FALSE	1402.8	0	0	75.3378	0	0	494.872	2586.88	7.32848	N/A	-	-
SJALL018430_G1	FALSE	43.58	7.22192	Male	White	Acute lymphoblastic leukemia	none	FALSE	442.12	0	0	75	0	0	660	2513.33	10.6884	N/A	-	-
SJALL042503_G1	FALSE	45.57	8.37534	Female	White	Acute lymphoblastic leukemia	none	FALSE	328.74	0	0	74.6711	0	0	503.356	3737.3	8.88158	N/A	-	-
SJALL018431_G1	FALSE	38.03	3.58904	Male	White	Acute lymphoblastic leukemia	none	FALSE	442.12	0	0	396.395	0	0	576.471	2351.96	61.2252	N/A	-	-
SJALL041242_G1	FALSE	32.79	2.75422	Male	White	Acute lymphoblastic leukemia	none	FALSE	681.02	0	0	50.8929	0	0	1316.13	1699.68	5.35714	N/A	-	-
SJALL042508_G1	FALSE	38.95	2.91045	Male	White	Acute lymphoblastic leukemia	none	FALSE	705.32	8151.15	0	283.18	0	0	6805.2	5441.74	87.7016	N/A	-	-
SJALL019726_G1	FALSE	35.28	3.18082	Female	White	Acute lymphoblastic leukemia	none	FALSE	442.12	900	0	101.974	0	0	663.415	2506.93	20.9253	N/A	-	-
SJALL041849_G1	FALSE	36.91	2.93425	Female	White	Acute lymphoblastic leukemia	none	FALSE	681.02	900	0	108.772	0	0	657.895	2382.46	22.807	N/A	-	-
SJALL018980_G1	FALSE	44.55	9.39452	Female	White	Acute lymphoblastic leukemia	none	FALSE	328.74	900	0	127.737	0	0	660.811	2393.34	19.5023	N/A	-	-
SJALL041848_G1	FALSE	36.06	3.04932	Male	White	Acute lymphoblastic leukemia	none	TRUE	442.12	900	0	75.3333	0	0	693.333	2605.42	14.6667	N/A	-	-
SJALL019725_G1	FALSE	37.85	8.0274	Female	Black	Acute lymphoblastic leukemia	none	FALSE	328.74	891.892	0	52.2472	0	0	660.87	2375.84	16.0942	N/A	-	-
SJALL018438_G1	FALSE	36.37	1.52055	Female	White	Acute lymphoblastic leukemia	none	FALSE	571.02	900	0	101.613	0	0	663.077	2518.8	20.8991	N/A	-	-
SJALL018978_G1	FALSE	48.44	14.0622	Male	White	Acute lymphoblastic leukemia	none	FALSE	268.14	900	0	88.0988	0	0	639.796	2399.52	11.5613	N/A	-	-
SJALL018977_G1	FALSE	49.58	14.863	Male	White	Acute lymphoblastic leukemia	none	FALSE	268.14	1191.49	0	100.444	0	0	659.307	2633	12.8889	N/A	-	-
SJALL041239_G1	FALSE	32.81	3.2	Male	White	Acute lymphoblastic leukemia	none	FALSE	442.12	900	0	64.5084	0	0	655.914	2772.67	14.4099	N/A	-	-
SJALL041238_G1	FALSE	35.71	4.7726	Female	White	Acute lymphoblastic leukemia	none	FALSE	442.12	900	0	113.218	0	0	585.393	2540.2	19.6755	N/A	-	-
SJALL018979_G1	FALSE	48.08	14.6773	Male	White	Acute lymphoblastic leukemia	none	FALSE	268.14	0	0	74.6667	0	0	482.317	2569.34	8.99187	N/A	-	-
SJALL041240_G1	FALSE	33.78	4.12877	Female	White	Acute lymphoblastic leukemia	none	FALSE	442.12	600	0	88.1849	0	0	594.253	2184.38	12.6223	N/A	-	-
SJALL041237_G1	FALSE	35	5.03014	Female	White	Acute lymphoblastic leukemia	none	FALSE	792.12	785.185	0	74.0964	0	0	660.241	2500.1	19.7531	N/A	-	-
SJALL018970_G1	FALSE	52.65	16.3829	Male	White	Acute lymphoblastic leukemia	none	FALSE	268.14	0	0	49.7041	0	0	0	2342.2	4.73373	N/A	-	-
SJALL041218_G1	FALSE	36.97	4.72719	Female	White	Acute lymphoblastic leukemia	none	FALSE	442.12	0	0	50	0	0	0	3205.33	5.6338	N/A	-	-
SJALL018966_G1	FALSE	40.64	4.06284	Female	White	Acute lymphoblastic leukemia	none	FALSE	442.12	0	0	50	0	0	0	2992.35	6.45161	N/A	-	-
SJALL018967_G1	FALSE	43.47	5.5378	Male	White	Acute lymphoblastic leukemia	none	FALSE	442.12	0	0	49.4318	0	0	0	2460	5.68182	N/A	-	-
SJALL018968_G1	FALSE	40.26	3.98361	Male	White	Acute lymphoblastic leukemia	none	TRUE	475.6	10907.5	0	371.348	0	0	0	4097.07	54.3752	N/A	-	-
SJALL041214_G1	FALSE	37.6	4.93488	Male	White	Acute lymphoblastic leukemia	none	FALSE	442.12	0	0	50.6944	0	0	0	1996.96	5.55556	N/A	-	LIG4_S205fs
SJALL041215_G1	FALSE	41.69	9.06075	Female	White	Acute lymphoblastic leukemia	none	FALSE	328.74	0	0	50	0	0	0	2678.92	6.18557	N/A	-	-
SJALL018969_G1	FALSE	43.01	6.16481	Female	White	Acute lymphoblastic leukemia	none	TRUE	442.12	11555	0	365.386	0	0	0	3729.93	56.9309	N/A	-	-
SJALL041216_G1	FALSE	34.96	2.54281	Male	White	Acute lymphoblastic leukemia	none	TRUE	681.02	0	0	50	0	0	0	2621.78	5.35714	N/A	-	-
SJALL019724_G1	FALSE	37.32	3.19452	Male	White	Acute lymphoblastic leukemia	none	FALSE	442.12	0	0	24.2188	0	0	0	2596.34	6.25	N/A	-	-
SJALL041217_G1	FALSE	34.15	1.7726	Male	White	Acute lymphoblastic leukemia	none	FALSE	571.02	0	0	49.0741	0	0	0	2660	5.55556	N/A	-	-
SJALL018426_G1	FALSE	46.4	10.8493	Female	White	Acute lymphoblastic leukemia	none	FALSE	328.74	10353.6	0	331.609	0	0	0	4160.35	49.9856	N/A	-	-
SJALL041226_G1	FALSE	41.85	10.8548	Male	White	Acute lymphoblastic leukemia	none	FALSE	328.74	0	0	38.7387	0	0	0	2453.57	6.30631	N/A	-	-
SJALL017884_G2	FALSE	40.79	2.38082	Male	Black	Acute lymphoblastic leukemia	none	TRUE	681.02	0	0	50	0	0	0	2825.1	6.45161	N/A	-	-
SJALL041223_G1	FALSE	32.68	1.44658	Female	White	Acute lymphoblastic leukemia	none	FALSE	571.02	0	0	50	0	0	0	2476	6.25	N/A	-	BLM_Y974fs
SJALL018972_G1	FALSE	40.65	4.87805	Male	White	Acute lymphoblastic leukemia	none	TRUE	442.12	0	0	50.6494	0	0	0	2460.49	6.41026	N/A	-	-
SJALL041225_G1	FALSE	35.16	3.21918	Male	White	Acute lymphoblastic leukemia	none	FALSE	442.12	0	0	50	0	0	0	3006.76	6.15385	N/A	-	-
SJALL018434_G1	FALSE	44.53	8.89315	Female	White	Acute lymphoblastic leukemia	none	FALSE	328.74	0	0	76.1319	0	0	658.904	2596.64	10.2249	N/A	-	-
SJALL041188_G1	FALSE	42.89	6.80274	Male	White	Acute lymphoblastic leukemia	none	FALSE	494.62	25986.3	0	0	0	0	0	2659.12	6.31579	N/A	-	-
SJALL018415_G1	FALSE	42.52	1.98082	Female	White	Acute lymphoblastic leukemia	none	FALSE	708.52	0	0	0	0	0	0	2688.49	3.77358	N/A	-	-
SJALL018946_G1	FALSE	58.99	17.1673	Male	White	Acute lymphoblastic leukemia	none	FALSE	2137.52	11292	0	0	0	0	0	1090.16	4.57143	N/A	-	-
SJALL019025_G1	FALSE	30.15	2.19178	Female	White	Acute lymphoblastic leukemia	none	FALSE	1341.76	0	0	25.3086	0	0	1041.33	9710.75	81.4815	N/A	-	-
SJALL018478_G1	FALSE	44.98	15.1858	Female	White	Acute lymphoblastic leukemia	none	FALSE	0	5974	0	316	0	0	0	1305.33	26.6667	N/A	-	-
SJALL018477_G1	FALSE	30.39	2.78636	Female	White	Acute lymphoblastic leukemia	none	FALSE	0	0	0	0	0	0	603.279	4295.08	55.7377	N/A	-	DCLRE1C_E104_E105fs
SJALL019023_G1	FALSE	31.88	2.23023	Male	White	Acute lymphoblastic leukemia	none	FALSE	516.02	9101.92	0	0	0	0	13197.8	5222.29	57.4074	N/A	-	-
SJALL041033_G1	FALSE	40.33	10.211	Male	White	Acute lymphoblastic leukemia	none	FALSE	252.54	9741.82	0	0	0	0	14946.1	4155.17	53.4483	N/A	-	-
SJALL041316_G1	FALSE	40.46	14.8988	Male	White	Acute lymphoblastic leukemia	none	FALSE	207.54	9729.59	0	0	0	0	16305	4175.79	43.9024	N/A	-	-
SJALL019022_G1	FALSE	30.84	2.54538	Male	White	Acute lymphoblastic leukemia	none	FALSE	516.02	9851.47	0	0	0	0	16154.5	4224.24	62.1212	N/A	-	-
SJALL041359_G1	FALSE	26.37	3.42466	Female	Black	Acute lymphoblastic leukemia	none	FALSE	337.12	9873.13	0	25	0	0	15862.2	4251.4	62.5	N/A	-	-
SJALL041358_G1	FALSE	24.97	2.33425	Female	White	Acute lymphoblastic leukemia	none	FALSE	0	11679.1	0	0	0	0	15229.1	4472.43	69.3842	N/A	-	-
SJALL041357_G1	FALSE	27.95	4.99726	Female	Black	Acute lymphoblastic leukemia	none	FALSE	0	9927.84	0	25	0	0	15542.8	4111.34	58.1633	N/A	-	-
SJALL041042_G1	FALSE	43.58	15.1671	Male	White	Acute lymphoblastic leukemia	none	TRUE	207.54	8788.14	0	24.5714	0	0	14483.4	4082.29	35.6322	N/A	-	-
SJALL019037_G1	FALSE	28.26	5.21096	Male	White	Acute lymphoblastic leukemia	none	FALSE	0	10161.7	0	24.7253	0	0	18038.6	4140.19	58.2418	N/A	-	-
SJALL041856_G1	FALSE	27.69	2.16361	Male	White	Acute lymphoblastic leukemia	none	FALSE	1341.76	9432.76	0	50.8621	0	0	15084.4	4179.31	56.8966	N/A	-	-
SJALL003449_G1	FALSE	22.14	0.235616	Male	White	Acute lymphoblastic leukemia	none	FALSE	729.66	11320	0	36.8421	0	0	14655.1	4363.16	152.632	N/A	-	-
SJALL019038_G1	FALSE	27.81	2.41787	Female	Black	Acute lymphoblastic leukemia	none	FALSE	1341.76	8051.61	0	40.625	0	0	14061.3	5604.55	139.062	N/A	-	-
SJALL003450_G1	FALSE	22.73	0.90137	Male	White	Acute lymphoblastic leukemia	none	FALSE	516.02	9911.11	0	25.5556	0	0	15515.6	3973.33	48.8889	N/A	-	-
SJALL041327_G1	FALSE	27.93	3.45753	Male	White	Acute lymphoblastic leukemia	none	FALSE	442.12	10036.1	0	24.5902	0	0	15821.8	4314.75	57.377	N/A	-	-
SJALL041326_G1	FALSE	25.72	1.95616	Male	White	Acute lymphoblastic leukemia	none	FALSE	681.02	8738.18	0	0	0	0	15617.8	4487.05	61.1111	N/A	-	-
SJALL021892_G1	FALSE	33.13	5.88767	Female	Black	Acute lymphoblastic leukemia	none	FALSE	1261.56	8668.89	0	25	0	0	14636.7	4130.32	58.8889	N/A	-	-
SJALL041324_G1	FALSE	30.32	5.67945	Female	White	Acute lymphoblastic leukemia	none	FALSE	0	11596.2	0	0	0	0	19013	4115.66	63.0952	N/A	-	MUTYH_R97*
SJALL019029_G1	FALSE	32.66	3.77808	Female	White	Acute lymphoblastic leukemia	none	FALSE	0	0	0	24.6914	0	0	550	4094.42	54.321	N/A	-	-
SJALL041333_G1	FALSE	29.37	2.28437	Male	White	Acute lymphoblastic leukemia	none	FALSE	681.02	12727.7	0	209.524	0	0	0	344.127	18.4615	N/A	-	-
SJALL019749_G1	FALSE	26.81	2.65205	Male	White	Acute lymphoblastic leukemia	none	FALSE	0	10447.7	0	25	0	0	14960	5416.44	56.25	N/A	-	-
SJALL041332_G1	FALSE	27.52	3.00548	Male	White	Acute lymphoblastic leukemia	none	FALSE	0	9035.38	0	37.9032	0	0	14536.9	4174.19	53.2258	N/A	-	-
SJALL041036_G1	FALSE	31.62	2.19452	Male	White	Acute lymphoblastic leukemia	none	FALSE	516.02	6900	0	37.2727	0	0	11788.9	4072.73	50.9091	N/A	-	-
SJALL018486_G1	FALSE	30.61	3.56712	Female	White	Acute lymphoblastic leukemia	none	FALSE	0	0	0	25	0	0	596.97	4124.07	58.0645	N/A	-	-
SJALL019028_G1	FALSE	30.75	3.08493	Male	White	Acute lymphoblastic leukemia	none	FALSE	0	10347.8	0	25.3846	0	0	17649.3	5462.88	60	N/A	-	-
SJALL041331_G1	FALSE	36.93	12.5014	Male	Black	Acute lymphoblastic leukemia	none	FALSE	207.54	10263.6	0	37.7778	0	0	15595.3	5482.22	48.8889	N/A	-	-
SJALL041330_G1	FALSE	37.95	14.4932	Male	White	Acute lymphoblastic leukemia	none	FALSE	207.54	7262.5	0	24.8521	0	0	11943.8	4129.57	35.503	N/A	-	-
SJALL041329_G1	FALSE	25.53	1.56712	Female	White	Acute lymphoblastic leukemia	none	FALSE	681.02	6707.41	0	25.5319	0	0	12064.6	4728.34	57.4468	N/A	-	ERCC2_R616P
SJALL018483_G1	FALSE	30.05	3.46849	Male	White	Acute lymphoblastic leukemia	none	TRUE	0	10900	0	25.3731	0	0	16597.1	4075.48	59.7015	N/A	-	POLG_A467T
SJALL018484_G1	FALSE	29.56	2.86301	Female	White	Acute lymphoblastic leukemia	none	FALSE	516.02	10590.3	0	37.5	0	0	16145.2	4620	61.6667	N/A	-	-
SJALL041031_G1	FALSE	34.81	3.75683	Male	White	Acute lymphoblastic leukemia	none	FALSE	442.12	0	0	0	0	0	613.235	4264.71	58.8235	N/A	-	-
SJALL041299_G1	FALSE	37.49	10.6465	Male	White	Acute lymphoblastic leukemia	none	FALSE	0	0	0	0	0	0	0	17230.6	6.06061	N/A	-	-
SJALL019729_G1	FALSE	41.86	12.5493	Female	Black	Acute lymphoblastic leukemia	none	FALSE	207.54	14353.3	0	49.0854	0	0	9326.22	349.228	52.8943	N/A	-	-
SJALL019731_G1	FALSE	34.36	5.6	Female	White	Acute lymphoblastic leukemia	none	TRUE	337.12	4256.76	0	182.432	0	0	1377.92	2260.96	5.71429	N/A	-	-
SJALL019730_G1	FALSE	31.6	2.36164	Female	White	Acute lymphoblastic leukemia	none	FALSE	516.02	4173.85	0	184.615	0	0	1365.22	2186.41	6.89655	N/A	-	-
SJALL018472_G1	FALSE	35.47	7.01304	Male	White	Acute lymphoblastic leukemia	none	FALSE	1233.66	7820	0	0	0	0	13337.4	4635.23	72.093	N/A	-	RAD50_T32fs
SJALL041030_G1	FALSE	40.67	9.58289	Female	White	Acute lymphoblastic leukemia	none	FALSE	252.54	7713.68	0	0	0	0	10940.9	4040.89	51.9685	N/A	-	-
SJALL041308_G1	FALSE	31.81	5.91161	Female	White	Acute lymphoblastic leukemia	none	TRUE	0	10065.9	0	0	0	0	15943.3	4528.08	59.5238	N/A	-	-
SJALL042663_G1	FALSE	35.46	7.78415	Male	White	Acute lymphoblastic leukemia	none	FALSE	252.54	12829.1	0	0	0	0	18379.1	4046	103.125	N/A	-	-
SJALL043447_G1	FALSE	39.39	7.35954	Male	White	Acute lymphoblastic leukemia	none	FALSE	337.12	4687.5	0	185.714	0	0	1389.74	2439.31	5.40541	N/A	-	-
SJALL018466_G1	FALSE	35.2	4.4411	Female	White	Acute lymphoblastic leukemia	none	FALSE	0	0	0	0	0	0	0	19141.4	5.88235	N/A	-	-
SJALL041344_G1	FALSE	30.57	6.62466	Female	White	Acute lymphoblastic leukemia	none	FALSE	442.12	9247.13	0	25	0	0	14693.5	4234.15	54.878	N/A	-	-
SJALL018467_G1	FALSE	34.95	4.92603	Female	White	Acute lymphoblastic leukemia	none	FALSE	337.12	4428.21	0	137.975	0	0	1378.31	1788.94	5.40541	N/A	-	-
SJALL019015_G1	FALSE	37.61	8.25981	Female	White	Acute lymphoblastic leukemia	none	FALSE	252.54	9204.26	0	0	0	0	10991.6	4243.21	57.4468	N/A	-	-
SJALL018471_G1	FALSE	30.25	0.523003	Female	Black	Acute lymphoblastic leukemia	none	FALSE	516.02	19067.1	0	0	0	0	40837.6	6695.2	109.411	N/A	-	-
SJAUL041029_G1	FALSE	44.6	13.2329	Male	White	Other leukemia	none	FALSE	0	8314.17	0	613.559	0	0	10605.8	5814.86	46.0853	N/A	-	-
SJALL041335_G1	FALSE	35.01	10.3863	Male	White	Acute lymphoblastic leukemia	none	FALSE	252.54	9870.91	0	35.2174	0	0	18612.4	4103.7	54.7826	N/A	-	-
SJALL041334_G1	FALSE	29.37	5.72611	Female	White	Acute lymphoblastic leukemia	none	TRUE	337.12	10977.2	0	24.7253	0	0	16468.2	4197.8	58.2418	N/A	-	-
SJALL019031_G1	FALSE	34.11	6.88219	Male	White	Acute lymphoblastic leukemia	none	FALSE	0	1912.75	0	133.333	0	0	3209.18	3869.34	18.8889	N/A	-	-
SJALL041265_G1	FALSE	31.54	3.86575	Male	White	Acute lymphoblastic leukemia	none	FALSE	337.12	4285.14	0	206.667	0	0	603.371	2265.22	7.24638	N/A	-	-
SJALL017880_G1	FALSE	30.57	2.48219	Female	White	Acute lymphoblastic leukemia	none	FALSE	516.02	4229.17	0	175	0	0	1375	2277.94	5.97015	N/A	-	-
SJALL043461_G1	FALSE	39.3	4.27063	Female	White	Acute lymphoblastic leukemia	none	FALSE	337.12	3381.69	0	134.286	0	0	2626.26	389.994	12.3804	N/A	-	-
SJALL018463_G1	FALSE	33.22	2.47061	Female	White	Acute lymphoblastic leukemia	none	FALSE	516.02	4200	0	148.387	0	0	1376.92	2756.88	13.3333	N/A	-	-
SJALL019016_G1	FALSE	29.54	2.24559	Female	White	Acute lymphoblastic leukemia	none	FALSE	0	0	0	0	0	0	584.483	7823.63	58.6207	N/A	-	-
SJWLM019841_G1	FALSE	38.51	3.7863	Female	White	Wilms tumor	none	FALSE	641.78	0	0	260.317	0	15.873	0	0	55.5556	N/A	-	-
SJWLM019633_G1	FALSE	41.8	0.587551	Female	White	Wilms tumor	none	FALSE	158.32	0	0	0	0	5.71429	0	0	42.8571	N/A	-	-
SJHL018666_G1	FALSE	45.84	16.235	Female	Black	Hodgkin lymphoma	none	TRUE	1823.62	0	0	0	0	0	0	0	0	FALSE	-	-
SJWLM017957_G1	FALSE	29.95	4.30137	Male	White	Wilms tumor	none	FALSE	0	0	0	0	0	4.6875	0	0	17.1875	N/A	CDH1_C688fs	-
SJEWS019206_G1	FALSE	33.72	6.79726	Female	White	Ewing sarcoma family of tumors	none	TRUE	1238.22	6613.4	0	345.361	0	7.21649	0	0	15.4639	N/A	-	-
SJWLM041712_G1	FALSE	26.14	1.22466	Male	White	Wilms tumor	none	FALSE	310.18	0	0	175	0	7.14286	0	0	37.5	N/A	-	-
SJEWS018613_G1	FALSE	38.52	10.9342	Male	White	Ewing sarcoma family of tumors	none	FALSE	829.08	10777.3	0	370.909	0	4.58716	0	0	8.25688	N/A	-	-
SJALL041318_G1	FALSE	42.55	17.3397	Male	White	Acute lymphoblastic leukemia	none	FALSE	389.34	9312.03	0	0	0	0	17033.5	4132.58	41.25	N/A	-	-
SJALL019027_G1	FALSE	39.9	12.0384	Female	White	Acute lymphoblastic leukemia	none	TRUE	252.54	7200	0	0	0	0	9323.91	4130.43	42.029	N/A	-	-
SJALL041034_G1	FALSE	36.25	6.36164	Male	Black	Acute lymphoblastic leukemia	none	FALSE	337.12	9694.74	0	0	0	0	17051.9	4184.62	60.4396	N/A	-	-
SJALL041321_G1	FALSE	31.84	5.58904	Female	White	Acute lymphoblastic leukemia	none	FALSE	0	9498.63	0	0	0	0	15458.6	4757.78	60	N/A	-	-
SJALL041325_G1	FALSE	36.34	11.2137	Female	White	Acute lymphoblastic leukemia	none	FALSE	252.54	10345.9	0	0	0	0	15781.8	4106.43	57.1429	N/A	-	-
SJALL019747_G1	FALSE	36.6	12.011	Male	White	Acute lymphoblastic leukemia	none	FALSE	252.54	8057.5	0	0	0	0	13986.1	4141.18	55.4622	N/A	-	-
SJALL019024_G1	FALSE	31.73	3.2411	Female	White	Acute lymphoblastic leukemia	none	FALSE	0	0	0	0	0	0	575	4187.5	56.25	N/A	-	-
SJALL019019_G1	FALSE	30.26	2.06093	Male	White	Acute lymphoblastic leukemia	none	FALSE	0	9805.77	0	0	0	0	15190.7	4166.04	55.3571	N/A	-	-
SJALL041292_G1	FALSE	38.53	12.4055	Female	White	Acute lymphoblastic leukemia	none	FALSE	252.54	4200	0	179.439	0	0	1376.58	2250.87	5.40541	N/A	-	-
SJALL019036_G1	FALSE	30.13	2.61103	Female	White	Acute lymphoblastic leukemia	none	FALSE	516.02	10003.6	0	25	0	0	14938.1	4152.46	48.2143	N/A	-	-
SJALL017890_G1	FALSE	35.38	8.01096	Female	White	Acute lymphoblastic leukemia	none	FALSE	252.54	5894.59	0	24.2718	0	0	10905.1	5456.97	60.1942	N/A	-	-
SJALL041354_G1	FALSE	27.57	3.43562	Female	White	Acute lymphoblastic leukemia	none	FALSE	0	10888.9	0	24.6154	0	0	18106.3	4147.69	55.3846	N/A	-	-
SJALL041355_G1	FALSE	25.26	3.40274	Female	White	Acute lymphoblastic leukemia	none	FALSE	1548.66	12197	0	78.9474	0	0	18897	4349.1	85.9649	N/A	-	-
SJALL041356_G1	FALSE	25.32	1.95842	Male	Black	Acute lymphoblastic leukemia	none	FALSE	516.02	6005	0	19.8276	0	0	11726.4	4139.1	48.2759	N/A	-	-
SJALL019741_G1	FALSE	37.42	2.55068	Female	White	Acute lymphoblastic leukemia	none	FALSE	681.02		0		0	0	0	0		N/A	-	-
SJALL041041_G1	FALSE	30.91	2.34916	Male	White	Acute lymphoblastic leukemia	none	FALSE	0	10201.7	0	25	0	0	16362.1	5399.06	56.8966	N/A	-	-
SJALL018475_G1	FALSE	33.18	6.13225	Female	White	Acute lymphoblastic leukemia	none	FALSE	337.12	9534.72	0	0	0	0	15036.1	4246.58	56.1644	N/A	-	-
SJALL041312_G1	FALSE	28.57	2.90537	Female	White	Acute lymphoblastic leukemia	none	FALSE	516.02	9119.3	0	0	0	0	13609	4213.79	50	N/A	-	-
SJALL019018_G1	FALSE	40.03	14.5461	Male	White	Acute lymphoblastic leukemia	none	FALSE	0	10087.7	0	0	0	0	18108.8	4140.35	40.9357	N/A	-	-
SJALL018474_G1	FALSE	30.84	2.84492	Female	White	Acute lymphoblastic leukemia	none	TRUE	516.02	6798.39	0	101.099	0	0	19218.6	5102.12	52.381	N/A	-	-
SJALL041313_G1	FALSE	43.15	17.724	Male	White	Acute lymphoblastic leukemia	none	FALSE	207.54	7273.46	0	0	0	0	10332.2	4105	43.75	N/A	-	-
SJALL018476_G1	FALSE	32.91	3.86612	Female	White	Acute lymphoblastic leukemia	none	FALSE	0	10043.1	0	0	0	0	15978.5	5404.93	61.5385	N/A	-	ERCC6_I931_P934fs
SJALL041032_G1	FALSE	30.24	2.00895	Male	White	Acute lymphoblastic leukemia	none	FALSE	0	10160.4	0	0	0	0	17798.4	4204	62	N/A	-	-
SJALL042857_G1	FALSE	33.9	2.76294	Male	White	Acute lymphoblastic leukemia	none	TRUE	0	4381.82	0	0	0	0	6726.65	4343.6	64.2857	N/A	-	-
SJALL041311_G1	FALSE	36.25	10.2561	Female	White	Acute lymphoblastic leukemia	none	FALSE	252.54	9019.2	0	0	0	0	12355	4413.14	52.459	N/A	-	-
SJALL042664_G1	FALSE	31.69	4.39891	Male	White	Acute lymphoblastic leukemia	none	FALSE	0	0	0	0	0	0	612	4160	61.3333	N/A	-	-
SJALL041310_G1	FALSE	25.77	1.911	Female	Other	Acute lymphoblastic leukemia	none	FALSE	516.02	7627.78	0	0	0	0	13424.1	4247.27	60	N/A	-	-
SJALL018473_G1	FALSE	38.22	8.88911	Female	White	Acute lymphoblastic leukemia	none	FALSE	0	10419.6	0	0	0	0	17931.2	4060.52	65.625	N/A	-	-
SJALL019017_G1	FALSE	35.4	5.23732	Female	White	Acute lymphoblastic leukemia	none	FALSE	337.12	10319.5	0	0	0	0	16240.8	4188.72	61.8421	N/A	-	-
SJALL019021_G1	FALSE	31.4	4.62022	Female	White	Acute lymphoblastic leukemia	none	FALSE	442.12	9721.92	0	0	0	0	14303.4	4256	52	N/A	-	-
SJALL019020_G1	FALSE	32.99	3.14304	Male	White	Acute lymphoblastic leukemia	none	FALSE	442.12	9130.43	0	0	0	0	12858.2	4272.73	60.6061	N/A	-	-
SJALL041315_G1	FALSE	31.98	6.74298	Male	White	Acute lymphoblastic leukemia	none	FALSE	337.12	10072.7	0	0	0	0	18159.7	4233.77	59.2105	N/A	-	-
SJALL017879_G1	FALSE	30.05	4.32514	Male	White	Acute lymphoblastic leukemia	none	FALSE	0	1805.8	0	0	0	0	3220.29	4307.25	49.2754	N/A	-	-
SJALL041317_G1	FALSE	31.62	5.67671	Female	White	Acute lymphoblastic leukemia	none	FALSE	0	0	0	0	0	0	591.892	4178.38	58.1081	N/A	-	-
SJALL041320_G1	FALSE	30.03	5.03315	Female	White	Acute lymphoblastic leukemia	none	FALSE	0	10078	0	0	0	0	15355.2	4144.58	58.5366	N/A	-	-
SJALL041322_G1	FALSE	37.13	13.0964	Female	White	Acute lymphoblastic leukemia	none	FALSE	207.54	6504.69	0	0	0	0	10171.4	4872.54	41.4141	N/A	-	-
SJALL018479_G1	FALSE	41.64	12.9021	Male	White	Acute lymphoblastic leukemia	none	FALSE	207.54	8336.59	0	0	0	0	11619.8	3900.64	42.7711	N/A	-	-
SJALL019026_G1	FALSE	30.64	2.70137	Female	White	Acute lymphoblastic leukemia	none	FALSE	0	0	0	0	0	0	449.153	4241.85	59.322	N/A	-	-
SJALL017877_G1	FALSE	26.09	0.800906	Male	White	Acute lymphoblastic leukemia	none	FALSE	0	8000	0	174.468	0	0	13289.1	8358.7	6.52174	N/A	-	-
SJALL019746_G1	FALSE	29.58	4.2459	Female	White	Acute lymphoblastic leukemia	none	FALSE	337.12	10923.1	0	0	0	0	15484.8	4304.07	41.1765	N/A	-	-
SJALL041360_G1	FALSE	37.32	14.0763	Female	White	Acute lymphoblastic leukemia	none	FALSE	0	0	0	24.8201	0	0	600	4077.7	48.9209	N/A	-	-
SJALL041043_G1	FALSE	36.55	8.47123	Male	Black	Acute lymphoblastic leukemia	none	FALSE	0	7443.4	0	216.038	0	0	0	5106.6	11.3208	N/A	-	-
SJALL019750_G1	FALSE	32.55	6.32231	Female	White	Acute lymphoblastic leukemia	none	FALSE	22.12	2000	0	37.5	0	0	0	1642	47	N/A	-	-
SJALL019039_G1	FALSE	31.13	4.76986	Male	White	Acute lymphoblastic leukemia	none	FALSE	337.12	8778.95	0	25	0	0	13598.4	4184.84	59.4595	N/A	-	-
SJHL019245_G1	FALSE	64.48	13.3969	Male	White	Hodgkin lymphoma	none	FALSE	0	1016.95	0	0	0	0	0	0	10.1695	FALSE	-	-
SJNHL019455_G1	FALSE	43.81	8.27397	Male	White	Non-Hodgkin lymphoma	none	FALSE	595.44	13968.3	0	483.333	0	0	1499.31	1878.91	50.8333	N/A	-	-
SJNBL019384_G1	FALSE	48.49	8.26299	Male	White	Neuroblastoma	none	FALSE	1298.06	14701	0	0	0	0	0	0	46.875	N/A	-	-
SJWLM018885_G1	FALSE	38.46	2.67123	Male	White	Wilms tumor	none	FALSE	0	0	0	173.333	0	10	0	0	50	N/A	-	-
SJAML018552_G1	FALSE	34.21	0.50411	Female	White	Acute myeloid leukemia	none	FALSE	0	7266.67	0	694.737	0	0	0	244.253	64.1026	N/A	-	-
SJHL041543_G1	FALSE	47.16	15.3671	Female	White	Hodgkin lymphoma	none	FALSE	1824.4	0	0	0	0	0	0	0	0	FALSE	-	-
SJOS041637_G1	FALSE	45.58	16.8712	Male	White	Osteosarcoma	none	FALSE	0	6001.85	0	450	0	0	0	50000	0	N/A	-	-
SJNBL019396_G1	FALSE	34.62	0.671233	Male	White	Neuroblastoma	none	FALSE	0	6043.24	0	178.571	0	0	0	0	0	N/A	-	-
SJNHL019456_G1	FALSE	40.53	6.77709	Male	White	Non-Hodgkin lymphoma	none	FALSE	1470.46	3600	0	243.038	0	0	0	57.5	7.59494	N/A	BRCA2_E1035*	BRCA2_E1035*
SJRHB017945_G1	FALSE	35.01	2.34795	Female	White	Rhabdomyosarcoma	none	FALSE	1121.02	12488.7	0	322.642	0	15.0943	0	0	60.3774	N/A	-	-
SJNHL019451_G1	FALSE	42.72	8.84932	Male	White	Non-Hodgkin lymphoma	none	FALSE	991.04	3076.92	0	115.385	0	0	0	1885.71	9.61538	N/A	-	-
SJOS042095_G1	FALSE	53.69	18.7374	Male	White	Osteosarcoma	none	FALSE	0	4812.26	0	447.642	0	0	0	45000	0	N/A	-	-
SJNBL017915_G2	FALSE	30.59	1.79039	Female	White	Neuroblastoma	none	FALSE	0	7366.67	560.784	180.392	0	0	2423.53	0	0	N/A	-	-
SJNBL019400_G1	FALSE	34.45	1.1589	Male	Black	Neuroblastoma	none	FALSE	0	5011.63	357.447	144.186	0	0	400	0	0	N/A	-	-
SJNHL041039_G1	FALSE	33.82	6.49041	Female	White	Non-Hodgkin lymphoma	none	FALSE	1527.66	2208.33	0	371.1	0	0	601.389	190.141	68.6644	N/A	BRCA1_L1252_S1253fs	BRCA1_L1252_S1253fs
SJNBL019399_G1	FALSE	33.22	0.649315	Female	White	Neuroblastoma	none	FALSE	0	5665.87	0	140.541	0	0	0	0	0	N/A	-	-
SJOS018807_G1	FALSE	44.39	15.4395	Female	White	Osteosarcoma	none	FALSE	0	6000	400	379.747	150	5.6962	0	144000	0	N/A	-	-
SJWLM018893_G1	FALSE	34.61	4.1726	Female	White	Wilms tumor	none	FALSE	407.78	0	0	181.159	0	8.69565	0	0	40.5797	N/A	-	-
SJWLM019652_G1	FALSE	34.98	2.13256	Female	White	Wilms tumor	none	FALSE	0	0	0	188.679	0	9.43396	0	0	43.3962	N/A	-	-
SJWLM019657_G1	FALSE	34.08	2.22466	Male	White	Wilms tumor	none	FALSE	524.66	0	0	222.951	0	8.19672	0	0	41.6667	N/A	-	-
SJWLM019661_G1	FALSE	35.63	3.37534	Male	White	Wilms tumor	none	FALSE	407.78	0	0	173.016	0	12.6984	0	0	39.6825	N/A	-	-
SJWLM019664_G1	FALSE	31.13	2.82452	Female	White	Wilms tumor	none	FALSE	271.7	0	0	164.815	0	9.25926	0	0	38.8889	N/A	WT1_R352*	-
SJWLM018892_G1	FALSE	29.79	1.02466	Female	White	Wilms tumor	none	TRUE	0	0	0	0	0	4.7619	0	0	19.0476	N/A	-	-
SJOS019521_G1	FALSE	47.28	13.5262	Male	Black	Osteosarcoma	none	FALSE	0	6000	0	450.407	0	0	0	45895.5	0	N/A	-	-
SJWLM019663_G1	FALSE	32.14	3.0542	Male	White	Wilms tumor	none	FALSE	678.56	0	0	187.5	0	9.375	0	0	43.75	N/A	-	-
SJOS019513_G1	FALSE	45.35	9.35684	Male	White	Osteosarcoma	none	FALSE	0	5951.02	0	525.51	0	0	0	46215	0	N/A	-	-
SJWLM019848_G1	FALSE	33.74	7.03089	Male	White	Wilms tumor	none	FALSE	634.36	0	0	201.099	0	8.79121	0	0	39.5604	N/A	-	-
SJOS018806_G1	FALSE	47.39	17.8932	Male	White	Osteosarcoma	none	FALSE	0	4433.14	450.549	425.424	119.429	4.57143	0	130112	0	N/A	-	-
SJWLM019655_G1	FALSE	40.04	6.29863	Female	White	Wilms tumor	none	FALSE	634.36	0	0	192.771	0	8.43373	0	0	38.5542	N/A	-	-
SJOS019522_G1	FALSE	45.54	14.8411	Female	White	Osteosarcoma	none	FALSE	0	0	0	0	0	0	0	0	0	N/A	-	-
SJWLM044962_G1	FALSE	36.95	2.92055	Male	White	Wilms tumor	none	TRUE	310.18	0	0	178.125	0	7.8125	0	0	39.0625	N/A	-	RAD50_K994_E995fs
SJWLM019662_G1	FALSE	35.01	3.19726	Female	White	Wilms tumor	none	FALSE	407.78	0	0	144.776	0	7.46269	0	0	35.8209	N/A	-	-
SJOS019524_G1	FALSE	45.78	14.5781	Female	White	Osteosarcoma	none	FALSE	0	4740	400	380	118.333	5	0	143667	0	N/A	-	-
SJOS019512_G1	FALSE	52.6	16.6845	Female	White	Osteosarcoma	none	TRUE	0	5410.14	0	466.667	0	0	0	45948.9	0	N/A	-	-
SJHL041544_G1	FALSE	40.79	12.4235	Male	White	Hodgkin lymphoma	none	FALSE	828.38	29299.2	0	374.615	0	0	0	0	83.3156	TRUE	-	-
SJNHL018769_G1	FALSE	38.53	5.32177	Female	Black	Non-Hodgkin lymphoma	none	TRUE	442.12	0	0	0	0	0	5078.26	2513.18	6.31579	N/A	-	-
SJHL019292_G1	FALSE	42.73	11.1945	Female	White	Hodgkin lymphoma	none	TRUE	1270.46	18805.8	0	0	0	0	0	0	63.1579	TRUE	-	-
SJHL019291_G1	FALSE	50.27	18.4274	Female	White	Hodgkin lymphoma	none	FALSE	1740.64	6648.89	0	224.823	88.0795	0	0	0	67.8765	TRUE	-	-
SJEWS019201_G1	FALSE	47.54	15.4027	Female	Black	Ewing sarcoma family of tumors	none	FALSE	0	14144.2	0	384.663	0	18.2927	0	0	25.6098	N/A	-	-
SJNHL018774_G1	FALSE	40.84	11.3068	Male	White	Non-Hodgkin lymphoma	none	FALSE	0	6530	0	177.586	0	0	0	4029.17	11.2069	N/A	-	-
SJNBL019405_G1	FALSE	33.15	1.75485	Male	White	Neuroblastoma	none	FALSE	0	6150	360	181.818	0	0	400	0	0	N/A	-	-
SJEWS018607_G1	FALSE	52.06	19.8989	Male	White	Ewing sarcoma family of tumors	none	FALSE	482.56	21482	0	433.715	0	14.0435	0	0	20.2291	N/A	-	-
SJEWS019204_G1	FALSE	44.36	16.1123	Female	White	Ewing sarcoma family of tumors	none	FALSE	187.84	11956.5	0	270.807	0	6.13497	0	0	12.2699	N/A	-	-
SJHL019778_G1	FALSE	38.39	6.21096	Male	White	Hodgkin lymphoma	none	FALSE	937.78	0	0	0	0	0	0	0	0	FALSE	-	-
SJNBL041592_G1	FALSE	33.57	0.542466	Female	White	Neuroblastoma	none	FALSE	0	10762.2	0	342.857	0	0	0	0	0	N/A	-	-
SJWLM019842_G1	FALSE	34	1.70959	Male	White	Wilms tumor	none	FALSE	0	0	0	0	0	12.766	0	0	48.9362	N/A	-	-
SJHL019271_G1	FALSE	42.18	6.42466	Male	White	Hodgkin lymphoma	none	FALSE	934.68	0	0	0	0	0	0	0	0	FALSE	-	-
SJNHL019464_G1	FALSE	37.93	7.15945	Male	White	Non-Hodgkin lymphoma	none	FALSE	611.9	2178.22	0	115.842	0	0	0	167.577	9.90099	N/A	-	-
SJHL019272_G1	FALSE	47.23	11.2411	Male	White	Hodgkin lymphoma	none	FALSE	193.52	0	0	0	0	0	0	0	0	FALSE	-	-
SJSTS041692_G1	FALSE	41.57	7.87945	Female	White	Soft tissue sarcoma	none	FALSE	0	0	0	0	0	0	0	0	0	N/A	-	-
SJAML018551_G1	FALSE	38.6	1.68767	Female	White	Acute myeloid leukemia	none	FALSE	0	7772	0	492	0	0	0	305.342	76.7397	N/A	-	-
SJEWS041499_G2	FALSE	51.54	13.3205	Male	White	Ewing sarcoma family of tumors	none	FALSE	656.68	11494.9	0	310.145	0	0	0	0	51.4493	N/A	-	-
SJWLM018890_G1	FALSE	36.62	4.33425	Female	Black	Wilms tumor	none	FALSE	407.78	0	0	168.657	0	7.46269	0	0	38.806	N/A	-	-
SJNHL019461_G1	FALSE	48.26	14.8797	Male	White	Non-Hodgkin lymphoma	none	FALSE	1761	4500	0	451.333	0	0	0	0	8	N/A	-	-
SJNHL018775_G1	FALSE	38.38	6.71507	Male	White	Non-Hodgkin lymphoma	none	TRUE	0	7202.35	0	177.647	0	0	0	4276.47	10.5882	N/A	-	-
SJHL019293_G1	FALSE	46.67	14.8438	Male	White	Hodgkin lymphoma	none	TRUE	1740.64	16054.2	0	0	0	0	0	0	45.3901	TRUE	-	-
SJNHL018771_G1	FALSE	37.1	5.24446	Female	Black	Non-Hodgkin lymphoma	none	FALSE	470.8	1714.29	0	0	0	0	0	2068.77	7.61905	N/A	-	-
SJRHB019583_G1	FALSE	38.76	7.44722	Male	White	Rhabdomyosarcoma	none	FALSE	368.2	10211.8	0	247.059	0	12.8713	0	0	56.4356	N/A	-	-
SJNHL018770_G1	FALSE	47.76	14.661	Male	White	Non-Hodgkin lymphoma	none	FALSE	1098.64	1651.38	0	0	0	0	0	1322.07	5.50459	N/A	-	-
SJOS019813_G1	FALSE	41.53	13.0658	Female	White	Osteosarcoma	none	FALSE	0	5953.85	386.093	403.846	150.769	6.15385	0	153295	0	N/A	-	-
SJHL019294_G1	FALSE	47.61	17.1699	Female	White	Hodgkin lymphoma	none	FALSE	1676.84	11795.3	0	0	0	0	0	0	48.1807	TRUE	-	-
SJHL019295_G1	FALSE	46.49	14.737	Male	White	Hodgkin lymphoma	none	TRUE	1460.2	0	0	0	0	0	0	0	0	FALSE	-	-
SJOS018805_G1	FALSE	46.56	16.2877	Male	White	Osteosarcoma	none	TRUE	0	1840	421.176	210.588	45.8333	1.66667	0	211900	0	N/A	-	-
SJOS018804_G1	FALSE	47.55	17.1726	Male	White	Osteosarcoma	none	FALSE	0	6012.12	401.212	383.03	150.909	6.06061	0	144000	0	N/A	-	-
SJCNS001522_G1	FALSE	31.91	1.31754	Female	White	Central nervous system (CNS)	none	TRUE	4071.26	8953.98	701.613	0	0	0	2341.94	25	20.4545	N/A	-	-
SJOS019519_G1	FALSE	36.19	5.00083	Male	White	Osteosarcoma	none	FALSE	0	0	0	0	0	0	0	0	0	N/A	-	-
SJCNS018565_G1	FALSE	32.08	0.643836	Female	White	Central nervous system (CNS)	none	FALSE	1066.02	7328.57	0	0	0	0	0	132.5	20	N/A	-	-
SJRHB041680_G1	FALSE	30.87	2.32603	Male	White	Rhabdomyosarcoma	none	FALSE	0	9271.19	0	301.667	0	13.5593	0	0	13.5593	N/A	-	-
SJNHL019460_G1	FALSE	39.33	7.79781	Male	White	Non-Hodgkin lymphoma	none	FALSE	390.98	1793.55	0	0	0	0	0	1338.09	8.60215	N/A	-	-
SJSTS019605_G1	FALSE	49.33	15.2253	Male	White	Soft tissue sarcoma	none	TRUE	0	0	0	0	0	0	0	0	0	N/A	-	-
SJHL041548_G1	FALSE	42.9	15.6849	Female	Black	Hodgkin lymphoma	none	FALSE	1740.64	12704.1	0	0	0	0	0	0	35.974	TRUE	-	-
SJSTS019606_G1	FALSE	45.1	13.6904	Male	Black	Soft tissue sarcoma	none	FALSE	0	4866.29	0	455.429	0	0	0	50784.9	0	N/A	-	-
SJNBL017920_G1	FALSE	31.13	0.830137	Female	White	Neuroblastoma	none	FALSE	0	0	0	0	0	0	0	0	0	N/A	-	-
SJHL019283_G1	FALSE	53.87	19.9208	Male	White	Hodgkin lymphoma	none	TRUE	1697.62	17311.1	0	147.753	40.4494	0	0	0	130.811	TRUE	-	-
SJNHL018772_G1	FALSE	42.77	9.54283	Male	White	Non-Hodgkin lymphoma	none	FALSE	390.98	1817.14	0	0	0	0	0	1303.52	8.57143	N/A	-	-
SJWLM019846_G1	FALSE	29.81	1.0411	Male	Black	Wilms tumor	none	FALSE	0	0	0	152.941	0	5.88235	0	0	25.4902	N/A	-	-
SJHL041547_G1	FALSE	41.48	14.6219	Female	White	Hodgkin lymphoma	none	FALSE	1526.44	13047.3	0	0	0	0	0	0	67.3951	TRUE	-	-
SJSTS018853_G1	FALSE	37.25	5.83327	Male	Black	Soft tissue sarcoma	none	FALSE	0	0	0	0	0	0	0	0	0	N/A	-	-
SJHL017906_G1	FALSE	47.06	14.9974	Male	White	Hodgkin lymphoma	none	TRUE	1020.82	16823.4	0	0	0	0	0	0	83.1882	TRUE	-	-
SJSTS019604_G1	FALSE	32.7	0.248634	Female	White	Soft tissue sarcoma	none	FALSE	0	0	0	0	0	0	0	0	0	N/A	-	-
SJNBL041595_G1	FALSE	30.46	0.352459	Male	White	Neuroblastoma	none	TRUE	0	6353.85	0	107.692	0	0	0	0	0	N/A	-	-
SJNBL041600_G1	FALSE	28.84	1.52055	Male	White	Neuroblastoma	none	FALSE	0	0	0	0	0	0	0	0	0	N/A	-	-
SJRHB017941_G1	FALSE	31.66	2.74521	Male	White	Rhabdomyosarcoma	none	FALSE	1451.02	10415.4	0	250.769	0	12.3077	0	0	56.9231	N/A	-	-
SJNHL019465_G1	FALSE	44.04	15.7808	Male	Black	Non-Hodgkin lymphoma	none	FALSE	268.14	0	0	0	0	0	4568.46	5227.36	4.8	N/A	BRCA2_K936fs	BRCA2_K936fs
SJNBL041601_G1	FALSE	26.47	0.252055	Male	White	Neuroblastoma	none	FALSE	0	4822.5	0	140	0	0	0	0	0	N/A	-	FANCA_R1117G
SJHL019784_G1	FALSE	40.2	14.589	Female	White	Hodgkin lymphoma	none	TRUE	783.4	9599.91	0	281.935	112.258	0	0	0	90.9677	TRUE	-	-
SJNHL041616_G1	FALSE	37.23	10.0466	Male	White	Non-Hodgkin lymphoma	none	FALSE	0	2286.86	0	121.898	0	0	0	655.944	10.219	N/A	-	-
SJRHB041682_G1	FALSE	32.02	5.12877	Male	White	Rhabdomyosarcoma	none	FALSE	0	9087.5	0	314.286	0	13.75	0	0	13.75	N/A	-	-
SJNHL019808_G1	FALSE	41.11	13.5781	Male	White	Non-Hodgkin lymphoma	none	FALSE	0	2272.73	0	121.212	0	0	0	368.5	7.07071	N/A	-	BRCA2_K936_Q937fs
SJEWS017900_G1	FALSE	50.68	19.9452	Male	White	Ewing sarcoma family of tumors	none	FALSE	996.46	12641.2	0	333.333	0	5.26316	0	0	2.10526	N/A	-	-
SJNBL018735_G1	FALSE	35.87	0.172535	Female	Black	Neuroblastoma	none	FALSE	0	0	0	0	0	0	0	0	0	N/A	-	-
SJHL019289_G1	FALSE	50.6	18.9808	Male	White	Hodgkin lymphoma	none	FALSE	1559.74	11182.5	0	169.663	67.9775	0	0	0	66.4772	TRUE	-	-
SJHL019290_G1	FALSE	38.69	7.5726	Male	White	Hodgkin lymphoma	none	FALSE	1123.1	0	0	0	0	0	0	0	0	FALSE	-	-
SJNHL017931_G1	FALSE	36.15	4.59178	Female	White	Non-Hodgkin lymphoma	none	FALSE	442.12	0	0	0	0	0	4190.14	4637.51	5.88235	N/A	-	-
SJNBL041598_G1	FALSE	28.16	0.142466	Male	White	Neuroblastoma	none	FALSE	0	4203.23	0	138.71	0	0	0	0	0	N/A	-	-
SJAML041466_G1	FALSE	32.36	4.82178	Female	White	Acute myeloid leukemia	none	FALSE	442.12	0	0	364.271	0	0	2305.97	218.31	0	N/A	-	-
SJWLM019659_G1	FALSE	31.83	1.63838	Female	White	Wilms tumor	none	FALSE	0	0	0	245.833	0	8.33333	0	0	39.5833	N/A	-	-
SJNHL019462_G1	FALSE	43.49	13.7946	Female	White	Non-Hodgkin lymphoma	none	TRUE	835.06	9054.14	0	205.263	0	0	0	4074.45	7.5188	N/A	-	-
SJNBL042061_G1	FALSE	29.19	0.0219178	Female	White	Neuroblastoma	none	TRUE	0	4750	0	107.143	0	0	0	0	0	N/A	-	-
SJSTS041018_G1	FALSE	30.67	0.183562	Female	Black	Soft tissue sarcoma	none	FALSE	0	0	0	0	0	0	0	0	0	N/A	-	-
SJNHL041621_G1	FALSE	32.86	8.43487	Female	White	Non-Hodgkin lymphoma	none	FALSE	0	3010.4	0	160.8	0	0	0	645.6	12	N/A	-	-
SJHL019302_G1	FALSE	41.82	12.4027	Male	White	Hodgkin lymphoma	none	TRUE	1205.66	7225.03	0	197.973	70.2703	0	0	0	67.7353	TRUE	-	-
SJRHB041015_G1	FALSE	47.18	15.1342	Female	White	Rhabdomyosarcoma	none	FALSE	1130.96	15458.9	0	338.164	0	15.4589	0	0	15.4589	N/A	-	-
SJHL019286_G1	FALSE	42.29	10.5507	Male	White	Hodgkin lymphoma	none	FALSE	828.38	15238.1	0	0	0	0	0	0	40.1709	TRUE	-	-
SJNHL041021_G1	FALSE	36.33	3.03562	Male	White	Non-Hodgkin lymphoma	none	TRUE	0	7031.25	0	198.413	0	0	0	4115.7	9.52381	N/A	-	-
SJNHL042734_G1	FALSE	36.29	8.42466	Female	White	Non-Hodgkin lymphoma	none	FALSE	505.08	2198	0	197	0	0	0	492.615	10	N/A	-	-
SJNHL017930_G1	FALSE	45.03	16.5699	Male	White	Non-Hodgkin lymphoma	none	FALSE	0	7245.57	0	201.266	0	0	0	3903.37	6.32911	N/A	-	RAD50_Q833fs
SJHL018665_G1	FALSE	41.01	12.137	Male	Black	Hodgkin lymphoma	none	TRUE	1677.26	7848.89	0	178.448	56.8966	0	0	0	62.4249	TRUE	-	-
SJWLM018889_G1	FALSE	34.23	1.73973	Male	White	Wilms tumor	none	TRUE	0	0	0	0	0	5.45455	0	0	21.8182	N/A	-	-
SJHL018662_G1	FALSE	36.77	3.00653	Male	White	Hodgkin lymphoma	none	FALSE	530.22	14344	0	0	0	0	0	0	43.0769	TRUE	-	-
SJNHL019466_G1	FALSE	36.72	8.20548	Female	White	Non-Hodgkin lymphoma	none	FALSE	328.74	0	0	0	0	0	4711.76	4419.22	5.12821	N/A	-	-
SJHL019287_G1	FALSE	44.8	11.6575	Male	Black	Hodgkin lymphoma	none	FALSE	828.38	15231.4	0	0	0	0	0	0	36.3095	TRUE	-	-
SJRHB018840_G1	FALSE	31.2	0.846575	Female	White	Rhabdomyosarcoma	none	FALSE	0	15228.3	0	331.915	0	23.913	0	0	28.2609	N/A	-	-
SJNHL018776_G1	FALSE	47.21	19.9233	Female	White	Non-Hodgkin lymphoma	none	TRUE	1797.5	17470	0	471.31	0	0	1219.05	7552.94	24.8319	N/A	-	-
SJWLM019849_G1	FALSE	31.62	3.63288	Female	White	Wilms tumor	none	FALSE	407.78	0	0	175	0	8.33333	0	0	41.6667	N/A	-	-
SJEWS019203_G1	FALSE	42.23	12.7836	Male	White	Ewing sarcoma family of tumors	none	FALSE	861.96	11770.5	0	341.096	0	5.33333	0	0	12	N/A	-	-
SJSTS019609_G1	FALSE	44.27	13.1425	Female	White	Soft tissue sarcoma	none	FALSE	0	0	0	357.143	0	0	0	0	0	N/A	-	POLG_G848S
SJHL019301_G1	FALSE	42.51	12.7068	Male	White	Hodgkin lymphoma	none	FALSE	242.5	0	0	0	0	0	0	0	0	FALSE	-	-
SJSTS019608_G1	FALSE	48.71	17.4247	Male	White	Soft tissue sarcoma	none	TRUE	0	0	0	0	0	0	0	0	0	N/A	-	ERCC6_Q156*
SJHL018664_G1	FALSE	45.65	16.011	Female	White	Hodgkin lymphoma	none	FALSE	1020.82	6003.27	0	0	0	0	0	0	16.7939	TRUE	-	-
SJNHL017923_G1	FALSE	30.98	2.36986	Male	White	Non-Hodgkin lymphoma	none	FALSE	0	7075.86	0	139.286	0	0	0	4129.12	12.5	N/A	-	-
SJWLM019658_G1	FALSE	34.42	3.40274	Male	White	Wilms tumor	none	FALSE	0	0	0	175	0	7.35294	0	0	35.2941	N/A	-	-
SJOS019525_G1	FALSE	32.74	3.65205	Male	Black	Osteosarcoma	none	TRUE	0	15644.7	356.25	298.438	0	0	0	0	0	N/A	-	-
SJHL018663_G1	FALSE	48.67	15.6356	Male	White	Hodgkin lymphoma	none	TRUE	1020.82	13228.8	0	0	0	0	0	0	102.889	TRUE	-	-
SJNBL019394_G1	FALSE	37.47	0.383562	Male	White	Neuroblastoma	none	FALSE	0	14881.6	0	362.5	0	0	0	0	0	N/A	-	-
SJNHL042733_G1	FALSE	39.21	10.8698	Female	White	Non-Hodgkin lymphoma	none	FALSE	187.58	2292.25	0	122.535	0	0	0	626.056	9.85915	N/A	-	-
SJNBL018740_G1	FALSE	31.31	0.112329	Female	White	Neuroblastoma	none	FALSE	0	3963.24	0	159.259	0	0	0	0	0	N/A	-	-
SJWLM019845_G1	FALSE	34.71	6.01644	Male	White	Wilms tumor	none	FALSE	0	0	0	0	0	5.49451	0	0	18.6813	N/A	-	-
SJHL019285_G1	FALSE	52.75	19.2712	Female	White	Hodgkin lymphoma	none	TRUE	1020.82	15183.6	0	0	0	0	0	0	81.3774	TRUE	-	-
SJOS017932_G1	FALSE	44.23	14.3918	Female	White	Osteosarcoma	none	FALSE	0	0	0	0	0	0	0	0	0	N/A	-	-
SJRHB041681_G1	FALSE	40.27	13.8466	Male	White	Rhabdomyosarcoma	none	FALSE	1688.02	15775.3	0	351.852	0	18.3544	0	0	20.2532	N/A	-	-
SJHL042006_G1	FALSE	49.79	18.4331	Female	White	Hodgkin lymphoma	none	FALSE	1551.64	7573.99	0	192.771	77.1084	0	0	0	59.2814	TRUE	-	-
SJWLM041703_G1	FALSE	28.99	0.424658	Male	White	Wilms tumor	none	FALSE	0	0	0	0	0	4.7619	0	0	19.0476	N/A	-	-
SJWLM017963_G1	FALSE	37.36	0.762295	Male	White	Wilms tumor	none	FALSE	0	0	0	357.143	0	16.6667	0	0	59.5238	N/A	-	-
SJNBL018734_G1	FALSE	36.23	0.759563	Female	White	Neuroblastoma	none	FALSE	452.58	0	0	0	0	0	0	0	0	N/A	-	-
SJEWS019197_G1	FALSE	42.91	6.00601	Male	White	Ewing sarcoma family of tumors	none	FALSE	307.86	15438.9	0	337.778	0	0	0	0	57.7778	N/A	-	-
SJHL019269_G1	FALSE	44.77	7.34153	Male	White	Hodgkin lymphoma	none	TRUE	1854.6	13215.5	0	0	0	0	0	0	44.5652	TRUE	-	-
SJHL041542_G1	FALSE	49.9	18.1234	Male	White	Hodgkin lymphoma	none	TRUE	2133.22	0	0	0	0	0	0	0	0	FALSE	-	-
SJOS019515_G1	FALSE	46.07	11.474	Male	Black	Osteosarcoma	none	TRUE	0	6011.01	0	450.459	0	0	0	49862.4	0	N/A	-	-
SJNHL019450_G1	FALSE	46.93	10.5397	Male	White	Non-Hodgkin lymphoma	none	TRUE	1115.88	3636.36	0	0	0	0	0	955.882	11.1111	N/A	-	-
SJCNS018564_G1	FALSE	50.43	8.6484	Male	White	Central nervous system (CNS)	none	FALSE	595.44	9395.65	0	0	0	0	0	39.1304	52.1739	N/A	-	-
SJSTS019601_G1	FALSE	46.89	9.89835	Male	White	Soft tissue sarcoma	none	FALSE	0	0	0	0	0	0	0	0	0	N/A	-	-
SJWLM041699_G1	FALSE	32.16	2.06301	Female	Black	Wilms tumor	none	FALSE	0	0	0	0	0	5.45455	0	0	21.8182	N/A	-	-
SJNHL019454_G1	FALSE	53.21	17.2658	Female	Black	Non-Hodgkin lymphoma	none	FALSE	841.9	1726.67	0	0	0	0	0	1900	8	N/A	-	-
SJNBL018744_G1	FALSE	27.86	1.16423	Male	White	Neuroblastoma	none	FALSE	0	6961.11	520.37	166.667	0	0	2250	0	0	N/A	-	-
SJNBL019802_G1	FALSE	43.9	5.72354	Male	White	Neuroblastoma	none	FALSE	329.94	1445.78	0	0	0	0	0	0	8.43373	N/A	-	-
SJNBL019387_G1	FALSE	38.71	0.50137	Male	White	Neuroblastoma	none	FALSE	321.3	0	0	0	0	0	0	0	0	N/A	-	-
SJHL041541_G1	FALSE	43.48	9.25479	Female	White	Hodgkin lymphoma	none	TRUE	1406.06	8818.25	0	0	0	0	0	0	25.7426	TRUE	-	-
SJHL017907_G1	FALSE	46.3	14.863	Female	White	Hodgkin lymphoma	none	FALSE	1402.2	0	0	0	0	0	0	0	0	FALSE	-	-
SJOS018800_G1	FALSE	49	13.5342	Female	White	Osteosarcoma	none	FALSE	0	6000	0	525	0	0	0	49826.9	0	N/A	-	-
SJHM019549_G1	FALSE	51.03	13.4301	Male	White	Acute myeloid leukemia	none	TRUE	2087.02	18037.3	0	0	0	0	0	2074.56	7.24206	N/A	-	-
SJSTS019602_G1	FALSE	37.18	0.224658	Female	White	Soft tissue sarcoma	none	FALSE	0	9035.29	0	0	0	8.82353	0	0	44.1176	N/A	-	-
SJNHL019449_G1	FALSE	47.36	10.1315	Male	White	Non-Hodgkin lymphoma	none	TRUE	635.48	3634.78	0	0	0	0	0	1740.74	8.69565	N/A	-	-
SJHL019268_G1	FALSE	53.31	17.6438	Female	White	Hodgkin lymphoma	none	FALSE	2140.62	8955.82	0	0	0	0	0	0	19.4595	TRUE	-	-
SJOS042869_G1	FALSE	52.72	14.1589	Female	White	Osteosarcoma	none	FALSE	0	5907.69	0	522.115	0	0	0	50000	0	N/A	-	-
SJWLM041025_G1	FALSE	33.82	1.54521	Female	White	Wilms tumor	none	TRUE	0	0	0	173.913	0	8.69565	0	0	41.3043	N/A	WT1_Copy loss	-
SJWLM017953_G2	FALSE	38.64	0.771151	Female	White	Wilms tumor	none	TRUE	0	0	0	0	0	9.52381	0	0	33.3333	N/A	-	-
SJHL019300_G1	FALSE	38.61	6.78706	Male	Black	Hodgkin lymphoma	none	FALSE	984.84	0	0	0	0	0	0	0	0	FALSE	-	-
SJWLM041710_G1	FALSE	31.63	3.56164	Female	White	Wilms tumor	none	FALSE	0	0	0	0	0	4.61538	0	0	20	N/A	-	-
SJHL042004_G1	FALSE	43.26	5.84696	Male	White	Hodgkin lymphoma	none	FALSE	1829.4	12157.2	0	109.877	0	0	0	0	46.7711	TRUE	-	-
SJEWS019196_G1	FALSE	57.31	20.8558	Male	White	Ewing sarcoma family of tumors	none	TRUE	661.68	5300.54	0	398.37	0	0	0	0	25	N/A	-	-
SJEWS019768_G1	FALSE	47.06	13.7789	Male	White	Ewing sarcoma family of tumors	none	FALSE	2203.96	8435.93	0	339.521	0	0	0	0	47.9042	N/A	-	-
SJAML018550_G1	FALSE	45.14	8.19399	Female	White	Acute myeloid leukemia	none	FALSE	0	6629.76	0	424.111	0	0	0	261.905	55.6168	N/A	MSH6_R911*	MSH6_R911*
SJNBL019409_G1	FALSE	31.53	0.00821918	Female	White	Neuroblastoma	none	TRUE	0	5185.19	0	181.481	0	0	0	0	0	N/A	-	-
SJEWS019198_G1	FALSE	54.28	17.7425	Male	White	Ewing sarcoma family of tumors	none	FALSE	732.46	7650	0	447.273	0	1.19048	0	0	30.303	N/A	-	-
SJNBL019391_G1	FALSE	37.38	1.02535	Female	White	Neuroblastoma	none	FALSE	0	15352.3	0	363.636	0	0	0	0	0	N/A	-	-
SJAML019103_G1	FALSE	47.78	13.4795	Female	White	Acute myeloid leukemia	none	FALSE	0	6398.54	0	456.861	0	0	0	209.304	47.8056	N/A	-	-
SJAML019104_G1	FALSE	45.56	11.4219	Male	White	Acute myeloid leukemia	none	FALSE	0	7031.15	0	470.908	0	0	0	167.979	53.9825	N/A	-	-
SJOS019511_G1	FALSE	51.65	14.291	Female	Black	Osteosarcoma	none	FALSE	0	1714.29	0	214.286	0	0	0	26127	0	N/A	-	-
SJNBL019392_G1	FALSE	36.69	1.21692	Male	White	Neuroblastoma	none	FALSE	500.1	0	0	0	0	0	0	0	0	N/A	-	-
SJRHB041678_G1	FALSE	44.11	10.4164	Female	Black	Rhabdomyosarcoma	none	FALSE	0	10800	0	287.5	0	13.3929	0	0	58.0357	N/A	-	-
SJWLM019843_G1	FALSE	32.84	1.71233	Male	White	Wilms tumor	none	FALSE	933.86	0	0	131.818	0	9.09091	0	0	43.1818	N/A	-	-
SJHL019266_G1	FALSE	41.11	4.77088	Female	White	Hodgkin lymphoma	none	TRUE	991.98	13692.9	0	0	0	0	0	0	38.2353	TRUE	-	-
SJHL019253_G1	FALSE	57.95	16.9388	Female	White	Hodgkin lymphoma	none	FALSE	1374.36	10700.4	0	0	0	0	0	0	36.8056	TRUE	-	-
SJOS041635_G1	FALSE	48.54	13.6521	Male	White	Osteosarcoma	none	FALSE	0	6000	0	497.576	0	0	0	44727.3	0	N/A	-	-
SJEWS044169_G1	FALSE	43.54	6.85923	Male	White	Ewing sarcoma family of tumors	none	TRUE	727.8	10901.5	0	277.551	0	11.5385	0	0	28.8462	N/A	-	-
SJWLM019649_G1	FALSE	46.09	12.3315	Female	White	Wilms tumor	none	FALSE	479.58	0	0	198.4	0	9.19048	0	0	39.2	N/A	-	-
SJWLM019840_G1	FALSE	37.64	1.72603	Male	White	Wilms tumor	none	TRUE	0	0	0	274.074	0	3.84615	0	0	21.1538	N/A	-	-
SJAML019105_G1	FALSE	43.43	9.80822	Male	White	Acute myeloid leukemia	none	FALSE	0	6871.43	0	409.867	0	0	0	247.297	54.6282	N/A	-	-
SJHL019267_G1	FALSE	53.65	15.5568	Female	White	Hodgkin lymphoma	none	FALSE	1708.4	19905.3	0	0	0	0	0	0	38.5542	TRUE	-	-
SJWLM018891_G1	FALSE	31.66	2.03013	Female	Black	Wilms tumor	none	FALSE	524.66	0	0	194	0	6	0	0	34	N/A	-	-
SJNBL018736_G1	FALSE	37.6	0.721746	Female	White	Neuroblastoma	none	FALSE	0	15731.9	0	486.957	0	0	0	0	0	N/A	-	-
SJHL019279_G1	FALSE	52.42	16.9644	Female	White	Hodgkin lymphoma	none	FALSE	1636.02	17128.4	0	0	0	0	0	0	93.1903	TRUE	-	-
SJWLM019648_G1	FALSE	37.34	1.86301	Male	White	Wilms tumor	none	FALSE	0	0	0	0	0	5.55556	0	0	20.3704	N/A	-	-
SJRHB019580_G1	FALSE	36.75	4.17808	Female	White	Rhabdomyosarcoma	none	FALSE	652.12	9528.77	0	223.288	0	9.58904	0	0	43.8356	N/A	-	-
SJNHL019442_G1	FALSE	57.37	16.2814	Male	White	Non-Hodgkin lymphoma	none	FALSE	581.08	20822.2	0	0	0	0	0	2110	50.7042	N/A	-	-
SJCNS019123_G1	FALSE	37.77	2.27057	Female	White	Central nervous system (CNS)	none	TRUE	1264.16	0	0	0	0	0	0	0	0	N/A	-	-
SJNHL019457_G1	FALSE	43.83	11.8082	Female	White	Non-Hodgkin lymphoma	none	FALSE	328.74	0	0	0	0	0	4295.71	4634.14	5.10949	N/A	-	-
SJST019550_G1	FALSE	52.39	17.1298	Female	White	Other malignancy	none	FALSE	530.74	4571.02	0	91.4773	0	6.25	0	0	5.68182	N/A	-	-
SJNHL041612_G1	FALSE	37.02	5.36438	Male	White	Non-Hodgkin lymphoma	none	FALSE	442.12	0	0	426.316	0	0	183.019	609.88	80.2632	N/A	-	-
SJNHL042063_G1	FALSE	42.32	8.5726	Male	White	Non-Hodgkin lymphoma	none	FALSE	390.98	1764.71	0	0	0	0	0	1024.99	8.82353	N/A	-	-
SJRHB019576_G1	FALSE	45.71	4.71695	Male	Black	Rhabdomyosarcoma	none	FALSE	912.34	7943.04	0	0	0	7.59494	0	0	22.7848	N/A	-	-
SJOS019516_G1	FALSE	49.72	15.9014	Male	Black	Osteosarcoma	none	FALSE	0	5400	0	447.826	0	0	0	50000	0	N/A	-	-
SJWLM018887_G1	FALSE	34.65	1.52877	Female	White	Wilms tumor	none	TRUE	0	0	0	0	0	6	0	0	22	N/A	-	-
SJWLM041713_G2	FALSE	30.57	1.73864	Female	White	Wilms tumor	none	FALSE	0	0	0	170.69	0	8.62069	0	0	37.931	N/A	-	-
SJHL018671_G1	FALSE	39.27	13.52	Male	White	Hodgkin lymphoma	none	FALSE	1020.82	6543.19	0	166.418	20.1493	0	0	0	59.0485	TRUE	-	-
SJNHL019471_G1	FALSE	32.27	5.36986	Male	White	Non-Hodgkin lymphoma	none	FALSE	0	6996.59	0	194.318	0	0	0	4266.48	6.81818	N/A	-	-
SJHL018668_G1	FALSE	46.8	17.7014	Male	White	Hodgkin lymphoma	none	FALSE	1564.04	8900.69	0	148.824	20	0	0	0	60.1426	TRUE	-	-
SJHL018670_G1	FALSE	37.87	10.2877	Male	White	Hodgkin lymphoma	none	FALSE	0	11025	0	201.6	76.8	0	0	0	77.1667	TRUE	-	-
SJCNS019126_G1	FALSE	30.87	2.49589	Male	Black	Central nervous system (CNS)	none	FALSE	3049.26	2903.28	0	0	0	0	0	0	4.91803	N/A	-	-
SJNBL019805_G1	FALSE	29.06	4.12877	Male	White	Neuroblastoma	none	FALSE	0	0	0	0	0	0	0	0	0	N/A	-	-
SJNHL018781_G1	FALSE	42.84	14.7041	Male	White	Non-Hodgkin lymphoma	none	TRUE	0	7162	0	478.889	0	0	4061.74	2224.83	59.5556	N/A	-	-
SJWLM019671_G1	FALSE	26.35	0.276712	Female	White	Wilms tumor	none	FALSE	0	0	0	0	0	1.43333	0	0	6.66667	N/A	-	-
SJOS019530_G1	FALSE	46.68	18.7479	Male	White	Osteosarcoma	none	FALSE	0	6600	400	379.747	139.873	6.32911	0	144000	0	N/A	FH_P174R	-
SJOS018802_G1	FALSE	35.54	3.23014	Male	White	Osteosarcoma	none	FALSE	0	6000	0	348.889	0	0	0	25000	0	N/A	-	-
SJNHL042867_G1	FALSE	40.64	4.10685	Female	White	Non-Hodgkin lymphoma	none	FALSE	0	1804.35	0	0	0	0	0	1798.46	10.1449	N/A	-	-
SJCNS041475_G1	FALSE	33.06	8.96438	Female	Black	Central nervous system (CNS)	none	FALSE	912.94	0	0	0	0	0	0	0	0	N/A	-	-
SJNHL041619_G1	FALSE	43.36	17.2959	Male	White	Non-Hodgkin lymphoma	none	FALSE	0	2375.33	0	126.667	0	0	0	500	9.33333	N/A	-	-
SJOS019527_G1	FALSE	41.4	12.8917	Female	Black	Osteosarcoma	none	FALSE	0	5700	300	380	90	6	0	120000	0	N/A	-	-
SJCNS041473_G1	FALSE	25.18	2.25479	Female	White	Central nervous system (CNS)	none	TRUE	2935.46	9206.04	176.923	0	0	0	0	0	32.6923	N/A	-	-
SJNBL019412_G1	FALSE	30.31	0.52748	Female	White	Neuroblastoma	none	FALSE	0	7462.5	597.674	255	0	0	667.442	0	0	N/A	-	-
SJNHL019473_G1	FALSE	43.86	15.6	Female	White	Non-Hodgkin lymphoma	none	FALSE	1046.6	2140	0	114.118	0	0	0	662.353	8.23529	N/A	-	-
SJRHB042523_G1	FALSE	37.3	7.07123	Male	White	Rhabdomyosarcoma	none	FALSE	302.56	16392.9	0	365.116	0	25	0	0	25	N/A	-	-
SJOS042096_G1	FALSE	37.64	12.0356	Female	White	Osteosarcoma	none	TRUE	0	6000	400	380	90	6	0	120000	0	N/A	-	-
SJAML041469_G1	FALSE	40.88	15.474	Female	White	Acute myeloid leukemia	none	FALSE	0	3224.05	0	254.516	0	0	4969.68	67.9245	20.6452	N/A	-	-
SJHL041553_G1	FALSE	40.96	16.8942	Male	Black	Hodgkin lymphoma	none	FALSE	1526.44	7194.32	0	206.024	69.8795	0	0	0	69.3215	TRUE	-	-
SJRHB019588_G1	FALSE	29.03	1.91058	Male	White	Rhabdomyosarcoma	none	FALSE	621.24	19583.8	0	120.69	0	23.3333	0	0	30	N/A	-	-
SJALL019748_G1	FALSE	28.04	2.60822	Female	White	Acute lymphoblastic leukemia	none	FALSE	516.02	0	0	162.903	0	0	6253.33	220	54.8387	N/A	-	-
SJRHB019587_G1	FALSE	31.26	1.79726	Female	White	Rhabdomyosarcoma	none	TRUE	742.74	12275.6	0	342.593	0	20.7547	0	0	26.4151	N/A	-	-
SJNHL019469_G1	FALSE	33.51	6.23025	Male	White	Non-Hodgkin lymphoma	none	FALSE	0	5990.48	0	198.81	0	0	0	5848.63	7.14286	N/A	-	-
SJRHB046_G	FALSE	40.63	15.3541	Female	White	Rhabdomyosarcoma	none	FALSE	1211.66	6695.23	0	159.722	0	9.00763	0	0	10.687	N/A	-	-
SJOS019509_G1	FALSE	56.68	15.0764	Female	White	Osteosarcoma	none	FALSE	0	0	0	0	0	0	0	0	0	N/A	-	-
SJNBL019415_G1	FALSE	29.17	1.09874	Female	White	Neuroblastoma	none	FALSE	510.9	5300	90.4762	107.143	0	0	1433.33	0	0	N/A	-	-
SJOS019529_G1	FALSE	42.46	14.0904	Male	White	Osteosarcoma	none	FALSE	0	5400	400	330.345	135.172	5.51724	0	144000	0	N/A	-	-
SJEWS041982_G1	FALSE	52.85	18.4294	Female	White	Ewing sarcoma family of tumors	none	TRUE	0	12860.1	0	384.024	0	6.85714	0	0	11.4286	N/A	-	-
SJHL019314_G1	FALSE	38.08	11.4438	Male	White	Hodgkin lymphoma	none	FALSE	1677.26	6590.73	0	200	50	0	0	0	75.5702	TRUE	-	-
SJNHL019477_G1	FALSE	40.91	14.4825	Male	White	Non-Hodgkin lymphoma	none	FALSE	465.88	2209.46	0	118.243	0	0	0	599.728	9.45946	N/A	-	-
SJAML042700_G1	FALSE	41.28	12.5808	Male	White	Acute myeloid leukemia	none	FALSE	268.14	10162.1	0	109.355	0	0	16089.7	3542.93	44.5946	N/A	-	-
SJWLM018898_G1	FALSE	31.2	3.88493	Male	White	Wilms tumor	none	FALSE	634.36	0	0	201.37	0	8.21918	0	0	41.0959	N/A	-	-
SJHL041552_G1	FALSE	42.68	18.2113	Male	White	Hodgkin lymphoma	none	FALSE	1828.02	0	0	0	0	0	0	0	0	FALSE	-	-
SJRHB019586_G1	FALSE	29.37	2.53973	Female	Black	Rhabdomyosarcoma	none	FALSE	742.74	3089.55	0	176.712	0	4.41176	0	0	4.41176	N/A	-	-
SJSTS042870_G1	FALSE	43.19	13.8978	Female	White	Soft tissue sarcoma	none	TRUE	791.14	0	0	0	0	0	0	0	0	N/A	-	-
SJNBL041603_G1	FALSE	26.23	0.916573	Female	Black	Neuroblastoma	none	FALSE	0	0	0	0	0	0	0	0	0	N/A	-	-
SJNBL019413_G1	FALSE	29.33	1.12389	Male	White	Neuroblastoma	none	FALSE	0	7633.26	580.435	154.348	0	0	2342.55	0	0	N/A	-	-
SJHL019785_G1	FALSE	32.82	6.62075	Female	White	Hodgkin lymphoma	none	FALSE	1070.16	13890.3	0	0	0	0	0	0	45.2381	TRUE	-	-
SJNBL018745_G1	FALSE	26.28	0.0767123	Male	White	Neuroblastoma	none	FALSE	0	6751.72	0	193.103	0	0	0	0	0	N/A	-	-
SJNHL017929_G1	FALSE	38.03	12.4384	Male	White	Non-Hodgkin lymphoma	none	FALSE	0	7309.68	0	212.903	0	0	0	4254.69	7.74194	N/A	-	-
SJHL019313_G1	FALSE	38.7	10.9534	Male	White	Hodgkin lymphoma	none	FALSE	1177.28	0	0	0	0	0	0	0	0	FALSE	-	-
SJWLM018897_G1	FALSE	30.52	3.11233	Female	White	Wilms tumor	none	FALSE	0	0	0	0	0	6.45161	0	0	24.1935	N/A	-	-
SJCNS019127_G1	FALSE	27.71	0.950685	Male	White	Central nervous system (CNS)	none	FALSE	2788.86	5906.38	86.2745	0	0	0	501.961	0	10.6383	N/A	SUFU_W88*	-
SJWLM041711_G1	FALSE	26.69	3.52055	Female	White	Wilms tumor	none	FALSE	0	0	0	153.968	0	9.52381	0	0	41.2698	N/A	-	-
SJNHL018777_G1	FALSE	39.39	9.27879	Female	White	Non-Hodgkin lymphoma	none	FALSE	920.64	13048.3	0	405.118	0	12.9771	0	0	35.9246	N/A	-	-
SJNHL019472_G1	FALSE	46.22	17.3205	Female	White	Non-Hodgkin lymphoma	none	FALSE	1046.6	2174.05	0	115.823	0	0	0	487.309	8.22785	N/A	-	-
SJSTS017947_G1	FALSE	38.61	14.1059	Female	White	Soft tissue sarcoma	none	FALSE	0	0	0	0	0	0	0	0	0	N/A	-	-
SJHL018657_G1	FALSE	49.4	12.8419	Female	White	Hodgkin lymphoma	none	TRUE	2668.82	13935.7	0	0	0	0	0	0	30.3704	TRUE	-	-
SJNBL019411_G1	FALSE	29.37	1.44266	Male	White	Neuroblastoma	none	TRUE	0	7687.23	568.085	185.106	0	0	2434.04	0	0	N/A	-	-
SJHL019254_G1	FALSE	46.56	5.64003	Female	White	Hodgkin lymphoma	none	FALSE	1012.38	0	0	0	0	0	0	0	0	FALSE	-	-
SJNBL017919_G1	FALSE	26.98	0.605479	Male	White	Neuroblastoma	none	FALSE	0	5383.33	0	183.333	0	0	0	0	0	N/A	-	-
SJNBL019417_G1	FALSE	30.55	2.38356	Female	White	Neuroblastoma	none	TRUE	0	7511.48	184.127	249.18	0	0	204.762	0	0	N/A	-	-
SJNBL041591_G1	FALSE	38.58	4.42925	Male	White	Neuroblastoma	none	FALSE	0	0	0	0	0	0	0	0	0	N/A	-	-
SJNHL018780_G1	FALSE	40.7	14.0082	Female	White	Non-Hodgkin lymphoma	none	FALSE	0	7085.92	0	197.887	0	0	0	4030.13	7.04225	N/A	-	-
SJHL018667_G1	FALSE	45.23	16.1858	Female	White	Hodgkin lymphoma	none	TRUE	1020.82	9196.1	0	245.342	78.2609	0	0	0	81.9876	TRUE	-	-
SJHL019304_G1	FALSE	38.51	10.3758	Male	White	Hodgkin lymphoma	none	TRUE	867.18	7204.19	0	200.87	79.1304	0	0	0	70.2399	TRUE	-	-
SJNBL019414_G1	FALSE	32.75	4.25137	Female	Black	Neuroblastoma	none	TRUE	0	3263.57	0	68.8525	0	0	0	0	0	N/A	-	-
SJHL017905_G1	FALSE	33.88	6.07491	Female	Black	Hodgkin lymphoma	none	FALSE	1070.16	10121.2	0	172.727	39.7727	0	0	0	82.7406	TRUE	-	-
SJNHL019468_G1	FALSE	37.7	7.3306	Female	White	Non-Hodgkin lymphoma	none	FALSE	442.12	0	0	0	0	0	4671.43	4551.82	5.55556	N/A	-	-
SJNHL018778_G1	FALSE	44.29	14.7197	Male	White	Non-Hodgkin lymphoma	none	FALSE	0	2315.95	0	122.086	0	0	0	652.14	8.58896	N/A	-	-
SJHL041019_G1	FALSE	51.03	11.8714	Male	White	Hodgkin lymphoma	none	TRUE	0	32331.8	0	0	0	0	0	0	163.9	TRUE	-	-
SJHL041550_G1	FALSE	41.52	16.402	Female	White	Hodgkin lymphoma	none	TRUE	2203.24	13666.7	0	0	0	0	0	0	23.9889	TRUE	-	-
SJWLM041708_G1	FALSE	32.01	4.70959	Female	White	Wilms tumor	none	FALSE	0	0	0	150.667	0	8	0	0	40	N/A	-	-
SJWLM041709_G1	FALSE	30.02	3.19178	Male	White	Wilms tumor	none	FALSE	0	0	0	208.929	0	8.92857	0	0	42.8571	N/A	-	-
SJNHL041617_G1	FALSE	37.04	11.5301	Male	White	Non-Hodgkin lymphoma	none	FALSE	366.84	2331.53	0	124.324	0	0	0	697.297	10.8108	N/A	-	-
SJRHB019584_G1	FALSE	31.8	0.161644	Female	White	Rhabdomyosarcoma	none	FALSE	534.26	12285.7	0	312.121	0	14.2857	0	0	14.2857	N/A	DICER1_Y1335fs	-
SJOS019528_G1	FALSE	39.42	10.7678	Male	White	Osteosarcoma	none	FALSE	0	6000	400	380.303	113.636	6.06061	0	144000	0	N/A	-	-
SJHL018656_G1	FALSE	57.83	19.1768	Male	White	Hodgkin lymphoma	none	TRUE	1371.4	16751.6	0	0	0	0	0	0	28.8288	TRUE	-	-
SJNBL019403_G1	FALSE	32.79	0.416341	Female	White	Neuroblastoma	none	FALSE	0	5250	0	140	0	0	0	0	0	N/A	-	-
SJNHL019809_G1	FALSE	31.5	5.6	Male	White	Non-Hodgkin lymphoma	none	FALSE	0	2295.29	0	122.353	0	0	0	615.186	10.5882	N/A	-	-
SJNHL019446_G1	FALSE	52.68	13.526	Female	White	Non-Hodgkin lymphoma	none	FALSE	1144.48	3648.65	0	0	0	0	0	2405.41	8.10811	N/A	-	-
SJHL019303_G1	FALSE	45.51	16.2382	Male	White	Hodgkin lymphoma	none	TRUE	822.28	11076.3	0	0	0	0	0	0	20.904	TRUE	-	-
SJNHL017924_G1	FALSE	42.06	2.84253	Male	White	Non-Hodgkin lymphoma	none	TRUE	819.26	15616.7	0	0	0	0	0	1556.06	41.2698	N/A	-	-
SJRHB019585_G1	FALSE	36.75	6.83643	Female	Black	Rhabdomyosarcoma	none	FALSE	389.62	17161	0	428.736	0	25.5814	0	0	25.5814	N/A	-	-
SJNHL019467_G1	FALSE	29.69	1.77179	Male	White	Non-Hodgkin lymphoma	none	FALSE	681.02	0	0	0	0	0	4660.66	3731.15	4.61538	N/A	-	-
SJWLM019654_G1	FALSE	40.84	7.41096	Female	White	Wilms tumor	none	FALSE	0	0	0	0	0	6.09756	0	0	21.9512	N/A	-	-
SJSTS017948_G1	FALSE	34.85	5.69746	Male	White	Soft tissue sarcoma	none	FALSE	0	0	0	0	0	0	0	0	0	N/A	-	FANCG_G494_E11splice
SJNBL018742_G1	FALSE	34.22	3.97541	Female	White	Neuroblastoma	none	FALSE	0	0	0	0	0	0	0	0	0	N/A	-	-
SJNHL018763_G1	FALSE	45.26	4.8106	Male	White	Non-Hodgkin lymphoma	none	FALSE	861.36	24925.4	0	0	0	0	0	2734	7.31707	N/A	-	-
SJNHL042735_G1	FALSE	40.06	12.257	Male	White	Non-Hodgkin lymphoma	none	FALSE	0	2305.83	0	123.333	0	0	0	674.375	10.8333	N/A	-	-
SJHL041545_G1	FALSE	40.62	11.8027	Male	White	Hodgkin lymphoma	none	FALSE	1270.46	12513.8	0	0	0	0	0	0	39.7661	TRUE	-	-
SJHL041539_G1	FALSE	52.37	17.3642	Female	White	Hodgkin lymphoma	none	TRUE	1810.2	14689.3	0	0	0	0	0	0	30.1471	TRUE	-	-
SJRHB018838_G1	FALSE	46.01	9.2137	Male	White	Rhabdomyosarcoma	none	FALSE	887.54	15347.6	0	282.524	0	19.4175	0	0	58.2524	N/A	-	-
SJHL042525_G1	FALSE	41.29	8.6	Male	White	Hodgkin lymphoma	none	FALSE	1270.46	17096.5	0	0	0	0	0	0	48.4536	TRUE	-	-
SJHL019297_G1	FALSE	48.31	16.211	Male	White	Hodgkin lymphoma	none	FALSE	1737.8	0	0	0	0	0	0	0	0	FALSE	-	-
SJWLM019635_G1	FALSE	41.87	2.09863	Female	White	Wilms tumor	none	TRUE	451.38	0	0	314.815	0	16.6667	0	0	62.963	N/A	-	-
SJNHL018779_G1	FALSE	46.74	17.792	Female	Black	Non-Hodgkin lymphoma	none	FALSE	207.54	0	0	0	0	0	4623.38	3807.59	5.19481	N/A	-	-
SJWLM019636_G1	FALSE	42.99	2.35616	Male	White	Wilms tumor	none	FALSE	545.28	0	0	200	0	13.6364	0	0	53.0303	N/A	-	-
SJCNS018566_G1	FALSE	28.12	2.02898	Male	White	Central nervous system (CNS)	none	FALSE	2464.06	14724.1	184.483	0	0	0	598.276	0	29.3103	N/A	SUFU_E438fs	-
SJNHL018766_G1	FALSE	40.6	5.3589	Male	White	Non-Hodgkin lymphoma	none	FALSE	0	3552.94	0	132.353	0	0	0	4014.08	10.2941	N/A	-	-
SJHL018654_G1	FALSE	54.5	14.6822	Female	White	Hodgkin lymphoma	none	FALSE	2933.72	0	0	0	0	0	0	0	0	FALSE	-	-
SJHL018661_G1	FALSE	50.83	16.9753	Female	White	Hodgkin lymphoma	none	FALSE	1593.04	14642	0	0	0	0	0	0	35.5104	TRUE	-	-
SJWLM018883_G1	FALSE	46.37	6.50411	Female	White	Wilms tumor	none	FALSE	595.62	0	0	0	0		0	0		N/A	-	-
SJOS041638_G1	FALSE	47.07	17.7315	Male	White	Osteosarcoma	none	FALSE	0	6012.66	0	448.101	0	0	0	50000	0	N/A	-	-
SJHL018673_G1	FALSE	45.4	18.1496	Female	White	Hodgkin lymphoma	none	TRUE	1321.62	9192.21	0	143.86	19.883	0	0	0	53.8969	TRUE	-	-
SJNHL019448_G1	FALSE	55.13	17.9382	Female	White	Non-Hodgkin lymphoma	none	FALSE	247.78	4300	0	113.333	0	0	0	0	13.3333	N/A	-	-
SJNBL019388_G1	FALSE	40.31	0.682192	Female	White	Neuroblastoma	none	FALSE	804.06	14158.1	0	484.211	0	0	0	0	0	N/A	-	-
SJHL018674_G1	FALSE	38.29	14.3603	Male	Black	Hodgkin lymphoma	none	FALSE	1740.64	8639.58	0	265.289	95.0413	0	0	0	86.1364	TRUE	-	-
SJHL042005_G1	FALSE	46.57	13.315	Female	White	Hodgkin lymphoma	none	FALSE	1525.34	18612.2	0	0	0	0	0	0	59.2857	TRUE	-	-
SJRHB041683_G1	FALSE	28.51	4.12877	Female	White	Rhabdomyosarcoma	none	FALSE	932.12	9295.77	0	298.592	0	14.0845	0	0	19.7183	N/A	-	-
SJWLM041701_G1	FALSE	31.56	1.83547	Male	White	Wilms tumor	none	FALSE	0	0	0	0	0	4.91803	0	0	19.6721	N/A	PALB2_Y1183*	-
SJHL019264_G1	FALSE	51.46	13.5918	Male	White	Hodgkin lymphoma	none	FALSE	581.08	0	0	0	0	0	0	0	0	FALSE	-	-
SJWLM019638_G1	FALSE	41.72	3.3863	Male	White	Wilms tumor	none	TRUE	295.94	0	0	300	0	12.069	0	0	37.931	N/A	-	-
SJCNS019129_G1	FALSE	37.08	10.8082	Male	Black	Central nervous system (CNS)	none	FALSE	2931.32	0	0	0	0	0	0	0	0	N/A	-	-
SJHL019288_G1	FALSE	44.63	13.1495	Male	White	Hodgkin lymphoma	none	FALSE	1828.02	0	0	0	0	0	0	0	0	FALSE	-	-
SJHL041556_G1	FALSE	37.41	14.8767	Male	White	Hodgkin lymphoma	none	FALSE	1790.42	0	0	0	0	0	0	0	0	FALSE	-	-
SJALL019728_G1	FALSE	43.55	14.7206	Male	White	Acute lymphoblastic leukemia	none	TRUE	268.14	0	0	0	0	0	4006.78	3991.99	4.62428	N/A	-	-
SJAML017891_G1	FALSE	29.31	1.58296	Male	White	Acute myeloid leukemia	syngeneic	FALSE	0	0	0	0	0	0	0	0	0	N/A	-	-
SJOS042616_G1	FALSE	46.38	17.5504	Female	White	Osteosarcoma	none	FALSE	0	9368.34	400	164.865	0	0	0	108000	0	N/A	-	-
SJNHL041622_G1	FALSE	37.86	12.3806	Male	Black	Non-Hodgkin lymphoma	none	FALSE	0	6595.73	0	440.171	0	0	0	41.0256	26.4957	N/A	-	-
SJALL018451_G1	FALSE	35.9	2.7126	Male	White	Acute lymphoblastic leukemia	none	FALSE	681.02	0	0	0	0	0	5637.5	5370.29	4.83871	N/A	-	-
SJNHL018782_G1	FALSE	43.64	16.1233	Male	White	Non-Hodgkin lymphoma	none	FALSE	0	5493.75	0	286.458	0	0	3660.75	132.812	18.75	N/A	-	-
SJNBL018746_G1	FALSE	27.5	1.17534	Female	White	Neuroblastoma	none	FALSE	0	8229.17	588.462	188.462	0	0	2492.45	0	0	N/A	-	-
SJWLM019672_G1	FALSE	27.29	1.27816	Female	White	Wilms tumor	none	FALSE	524.66	0	0	179.545	0	6.81818	0	0	36.3636	N/A	-	-
SJOS019531_G1	FALSE	42.63	16.1507	Male	White	Osteosarcoma	none	TRUE	0	9867.2	397.59	388.554	0	0	0	108072	0	N/A	-	-
SJHL019316_G1	FALSE	36.88	12.1973	Female	White	Hodgkin lymphoma	none	FALSE	1677.26	6679.81	0	199.18	79.5082	0	0	0	64.8964	TRUE	-	-
SJHL042007_G1	FALSE	46.18	17.2055	Female	White	Hodgkin lymphoma	none	TRUE	2726.44	3719.02	0	75	30.1282	0	0	0	25.592	TRUE	-	-
SJNBL041604_G1	FALSE	29.09	4.1726	Male	Black	Neuroblastoma	none	FALSE	0	0	0	0	0	0	0	0	0	N/A	-	-
SJHL019308_G1	FALSE	45.84	16.7875	Male	White	Hodgkin lymphoma	none	FALSE	1385	0	0	0	0	0	0	0	0	FALSE	-	-
SJNBL041602_G1	FALSE	23.32	0.0849315	Female	White	Neuroblastoma	none	FALSE	0	8268.97	182.051	196.667	0	0	202.564	0	0	N/A	-	-
SJAML019101_G1	FALSE	38.25	1.61203	Female	Black	Acute myeloid leukemia	none	TRUE	0	7172	0	482.235	0	0	0	286.648	61.0881	N/A	-	-
SJNBL019389_G1	FALSE	52.24	14.4053	Male	White	Neuroblastoma	none	FALSE	805.9	18815.2	0	589.231	0	0	0	0	0	N/A	-	-
SJHL041555_G1	FALSE	42.08	18.6356	Female	White	Hodgkin lymphoma	none	FALSE	1563.84	7584.5	0	136.364	52.5974	0	0	0	54.6855	TRUE	-	-
SJNHL041623_G1	FALSE	34.19	9.28685	Male	White	Non-Hodgkin lymphoma	none	FALSE	1169.88	2215.74	0	117.593	0	0	0	643.925	10.1852	N/A	-	-
SJRHB018841_G1	FALSE	28.1	1.80043	Male	White	Rhabdomyosarcoma	none	FALSE	0	0	0	0	0	7.54717	0	0	43.3962	N/A	-	-
SJOS019523_G1	FALSE	47.74	15.4932	Male	White	Osteosarcoma	none	FALSE	0	6000	0	450	0	0	0	50043.5	0	N/A	-	-
SJWLM019653_G1	FALSE	37.22	5.82466	Male	Black	Wilms tumor	none	FALSE	1295.86	0	0	217.391	0	8.69565	0	0	42.3913	N/A	-	-
SJHL042615_G1	FALSE	44.45	12.1233	Female	White	Hodgkin lymphoma	none	FALSE	1146.3	0	0	0	0	0	0	0	0	FALSE	-	-
SJOS019814_G1	FALSE	31.38	3.23562	Female	White	Osteosarcoma	none	FALSE	0	2346.71	435.714	225	0	0	0	112000	0	N/A	-	-
SJHL018655_G1	FALSE	55.5	15.8603	Male	Black	Hodgkin lymphoma	none	FALSE	3055.22	20027.4	0	0	0	0	0	0	58.6667	TRUE	-	-
SJHL019260_G1	FALSE	46.03	5.81966	Male	Black	Hodgkin lymphoma	none	FALSE	928.08	0	0	0	0	0	0	0	0	FALSE	-	FANCC_S119_H120fs
SJHL019270_G1	FALSE	48.78	11.5205	Male	White	Hodgkin lymphoma	none	FALSE	1384.46	0	0	0	0	0	0	0	0	FALSE	-	-
SJNHL017922_G1	FALSE	31.41	8.14521	Male	White	Non-Hodgkin lymphoma	none	FALSE	0	2296.39	0	121.687	0	0	0	480	10.8434	N/A	-	-
SJOS018803_G1	FALSE	45.29	13.4716	Male	White	Osteosarcoma	none	FALSE	0	6000	0	450	0	0	0	50000	0	N/A	-	-
SJWLM018882_G1	FALSE	40.84	1.13973	Male	Black	Wilms tumor	none	FALSE	447.08	0	0	200	0	13.9535	0	0	58.1395	N/A	-	-
SJWLM017960_G1	FALSE	40.86	7.42466	Male	White	Wilms tumor	none	FALSE	978.12	0	0	0	0	12.0482	0	0	45.7831	N/A	-	-
SJNBL018731_G1	FALSE	39.68	0.917808	Male	White	Neuroblastoma	none	TRUE	529.3	14172.7	0	531.111	0	0	0	0	0	N/A	-	-
SJOS019520_G1	FALSE	49.03	16.541	Male	White	Osteosarcoma	none	FALSE	0	5996.58	0	441.781	0	0	0	45000	0	N/A	-	-
SJOS019510_G1	FALSE	52.75	13.0548	Male	White	Osteosarcoma	none	TRUE	0	6000	0	497.368	0	0	0	39736.8	0	N/A	-	-
SJRHB019833_G1	FALSE	35.2	7.84658	Male	White	Rhabdomyosarcoma	none	FALSE	0	15684.2	0	361.856	0	23.1579	0	0	23.1579	N/A	-	-
SJHL041540_G1	FALSE	54.88	19.5096	Male	White	Hodgkin lymphoma	none	FALSE	3509.42	11293.2	0	0	0	0	0	0	27.5701	TRUE	-	-
SJRHB041676_G1	FALSE	41.03	3.76712	Female	White	Rhabdomyosarcoma	none	TRUE	1764.8	10525.8	0	195.455	0	15.3846	0	0	38.4615	N/A	-	-
SJHL019298_G1	FALSE	45.32	15.1726	Male	Black	Hodgkin lymphoma	none	FALSE	2868.24	0	0	0	0	0	0	0	0	FALSE	-	-
SJEWS019195_G1	FALSE	43.57	4.1589	Female	White	Ewing sarcoma family of tumors	none	FALSE	873.24	28033.8	0	283.529	0	0	0	0	95.8824	N/A	-	-
SJWLM019634_G1	FALSE	46.86	6.72329	Male	White	Wilms tumor	none	FALSE	536.66	0	0	306.593	0	14.2857	0	0	61.5385	N/A	-	-
SJHL041537_G1	FALSE	49.2	13.9562	Female	White	Hodgkin lymphoma	none	FALSE	1797.7	15366.7	0	409.032	0	0	0	0	141.267	TRUE	-	-
SJRHB019578_G1	FALSE	39.16	2.25149	Male	White	Rhabdomyosarcoma	none	FALSE	1954.74	11929.8	0	254.386	0	15.7895	0	0	47.3684	N/A	-	-
SJHL019258_G1	FALSE	48.47	7.17808	Female	White	Hodgkin lymphoma	none	TRUE	806.94	25984.2	0	0	0	0	0	0	72.2892	TRUE	-	-
SJCNS019756_G1	FALSE	25.55	1.49589	Male	Black	Central nervous system (CNS)	none	FALSE	0	0	0	0	0	0	0	0	0	N/A	-	-
SJHL019265_G1	FALSE	53.02	14.9995	Female	White	Hodgkin lymphoma	none	TRUE	1352.98	0	0	0	0	0	0	0	0	FALSE	-	-
SJCNS018567_G1	FALSE	43.08	15.7151	Male	White	Central nervous system (CNS)	none	TRUE	3184.72	0	356.459	0	0	0	1188.52	0	0	N/A	-	-
SJNBL018741_G1	FALSE	30.61	0.950685	Male	White	Neuroblastoma	none	FALSE	0	2100	549.057	35.1852	0	0	585.185	0	0	N/A	-	-
SJHL019299_G1	FALSE	47.56	17.1671	Male	White	Hodgkin lymphoma	none	FALSE	1526.44	14129.3	0	0	0	0	0	0	81.8355	TRUE	-	-
SJEWS017899_G1	FALSE	42.3	5.79452	Female	White	Ewing sarcoma family of tumors	none	FALSE	207.16	16278.1	0	0	0	0	0	0	58.9041	N/A	-	-
SJHL019315_G1	FALSE	45.34	17.8954	Female	White	Hodgkin lymphoma	none	FALSE	1020.82	8486.94	0	192.262	39.2857	0	0	0	64.2565	TRUE	-	-
SJWLM019660_G1	FALSE	33.79	3.2274	Female	White	Wilms tumor	none	FALSE	407.78	0	0	174.286	0	8.57143	0	0	40	N/A	-	-
SJWLM019847_G1	FALSE	29.12	1.71461	Male	White	Wilms tumor	none	FALSE	524.66	0	0	230.909	0	7.27273	450	0	38.1818	N/A	-	-
SJWLM041707_G1	FALSE	34.88	7.52055	Female	White	Wilms tumor	none	FALSE	0	0	0	0	0	4.34783	0	0	16.3043	N/A	-	-
SJWLM041706_G1	FALSE	27.59	0.553425	Female	White	Wilms tumor	none	FALSE	0	0	0	0	0	4.7619	0	0	19.0476	N/A	-	-
SJWLM041705_G1	FALSE	27.62	0.528767	Female	White	Wilms tumor	none	FALSE	0	0	0	0	0	5	0	0	22.5	N/A	-	-
SJOS041639_G1	FALSE	34.87	6.17081	Female	White	Osteosarcoma	none	FALSE	0	0	0	0	0	0	0	0	0	N/A	-	-
SJNHL017927_G1	FALSE	45.11	11.0877	Male	White	Non-Hodgkin lymphoma	none	FALSE	716.78	2773.58	0	0	0	0	0	2339.62	8.49057	N/A	-	-
SJNBL019390_G1	FALSE	36.66	0.306849	Male	White	Neuroblastoma	none	FALSE	0	15909.1	0	542.424	0	0	0	0	0	N/A	-	POLG_R275*
SJSTS042766_G1	FALSE	39.91	14.554	Female	White	Soft tissue sarcoma	none	FALSE	0	0	0	0	0	0	0	0	0	N/A	-	-
SJHL019257_G1	FALSE	54.85	14.6849	Female	Black	Hodgkin lymphoma	none	TRUE	2727.92	28980	0	0	0	0	0	0	56.6854	TRUE	-	-
SJNHL041615_G1	FALSE	44.58	16.3589	Male	White	Non-Hodgkin lymphoma	none	FALSE	156.5	3030.3	0	151.515	0	0	0	654.545	6.06061	N/A	-	-
SJNBL018733_G1	FALSE	39.07	2.48174	Male	Black	Neuroblastoma	none	FALSE	1236.86	10144.8	0	517.241	0	0	0	0	0	N/A	-	-
SJNHL018765_G1	FALSE	42.25	6.79726	Male	White	Non-Hodgkin lymphoma	none	TRUE	442.12	5134.33	0	197.015	0	0	0	2334.71	14.9254	N/A	-	-
SJRHB042499_G1	FALSE	57.07	18.1937	Male	Black	Rhabdomyosarcoma	none	FALSE	1077.16	15301.1	0	252.299	0	18.3908	0	0	28.7356	N/A	-	-
SJOS019812_G1	FALSE	47.33	13.4137	Female	White	Osteosarcoma	none	TRUE	0	5842.72	0	511.65	0	0	0	61786.4	0	N/A	-	-
SJRHB017943_G1	FALSE	44.46	6.72329	Male	White	Rhabdomyosarcoma	none	TRUE	1022.38	10545.3	0	320	0	13.6842	0	0	51.5789	N/A	-	-
SJALL041261_G1	FALSE	33.88	5.06924	Female	White	Acute lymphoblastic leukemia	none	FALSE	337.12	4963.86	0	150.602	0	0	1676.74	2013.78	6.32911	N/A	-	-
SJNBL019803_G1	FALSE	37.84	1.19624	Female	Black	Neuroblastoma	none	FALSE	870.66	1458.33	0	0	0	0	0	0	0	N/A	-	-
SJNBL018732_G1	FALSE	38.14	0.40274	Male	White	Neuroblastoma	none	FALSE	0	4918.75	0	171.875	0	0	0	0	0	N/A	-	-
SJNHL041609_G1	FALSE	43.28	9.03288	Male	White	Non-Hodgkin lymphoma	none	FALSE	328.74	2451.26	0	115.126	0	0	0	2629.52	9.2437	N/A	-	-
SJHL019255_G1	FALSE	46.93	6.29197	Male	White	Hodgkin lymphoma	none	TRUE	2368.5	7797.44	0	0	0	0	0	0	39.7436	FALSE	-	-
SJWLM019641_G1	FALSE	40.07	1.70959	Female	White	Wilms tumor	none	FALSE	402.28	0	0	166	0	14	0	0	56	N/A	-	-
SJHL041546_G1	FALSE	38.67	11.5507	Female	White	Hodgkin lymphoma	none	FALSE	1509.98	0	0	0	0	0	0	0	0	FALSE	-	-
SJNHL019478_G1	FALSE	35.89	9.67123	Male	White	Non-Hodgkin lymphoma	none	FALSE	0	6124.39	0	195.122	0	0	0	3934.15	7.31707	N/A	-	-
SJNHL019445_G1	FALSE	50.62	11.3678	Male	White	Non-Hodgkin lymphoma	none	FALSE	0	2576.15	0	0	0	0	0	2509.01	9.17431	N/A	-	-
SJNHL019444_G1	FALSE	41.46	3.68493	Female	White	Non-Hodgkin lymphoma	none	TRUE	991.98	3522.58	0	125.806	0	0	0	1907.81	8.06452	N/A	-	-
SJHL019259_G1	FALSE	49.78	8.96297	Male	White	Hodgkin lymphoma	none	FALSE	1132.68	0	0	0	0	0	0	0	0	FALSE	-	-
SJNHL019443_G1	FALSE	47.98	9.3726	Female	White	Non-Hodgkin lymphoma	none	TRUE	1719.76	17454.9	0	0	0	0	0	1752	30.9278	N/A	-	-
SJHL019781_G1	FALSE	45.68	14.4339	Female	White	Hodgkin lymphoma	none	TRUE	2355.12	11994.5	0	0	0	0	0	0	75.7028	TRUE	-	-
SJHL019278_G1	FALSE	43.6	9.18356	Male	Black	Hodgkin lymphoma	none	TRUE	2605.34	24568.6	0	0	0	0	0	0	73.2673	TRUE	-	-
SJNHL018767_G1	FALSE	37.63	3.68767	Female	White	Non-Hodgkin lymphoma	none	FALSE	591.3	3617.65	0	0	0	0	0	1333.02	10.2941	N/A	-	-
SJWLM019645_G1	FALSE	43.12	7.21918	Female	White	Wilms tumor	none	TRUE	848.18	0	0	140.659	0	8.79121	0	0	45.0549	N/A	-	-
SJHL019779_G1	FALSE	47.66	15.3753	Female	White	Hodgkin lymphoma	none	TRUE	2843.12	20128.6	0	0	0	0	0	0	39.3333	TRUE	-	-
SJNHL018764_G1	FALSE	50.41	11.7836	Female	White	Non-Hodgkin lymphoma	none	FALSE	1259.98	3586.78	0	0	0	0	0	1677.69	9.91736	N/A	-	-
SJHL019261_G1	FALSE	52.5	14.3916	Female	White	Hodgkin lymphoma	none	FALSE	0	29571.1	0	0	0	0	0	0	42.515	TRUE	-	-
SJRHB019831_G1	FALSE	45.38	11.1479	Female	White	Rhabdomyosarcoma	none	FALSE	0	8620.37	0	186.111	0	13.3333	0	0	44.4444	N/A	-	-
SJRHB018837_G1	FALSE	37.6	0.394521	Male	White	Rhabdomyosarcoma	none	TRUE	0	10272.2	0	213.889	0	12.1212	0	0	42.4242	N/A	-	-
SJWLM018884_G1	FALSE	38.4	1.09863	Female	Black	Wilms tumor	none	FALSE	433.58	0	0	355	0	7.5	0	0	35	N/A	-	-
SJHL042843_G1	FALSE	46.74	6.54463	Male	White	Hodgkin lymphoma	none	TRUE	852.48	0	0	0	0	0	0	0	0	FALSE	-	-
SJCNS019128_G1	FALSE	32.01	5.19452	Female	White	Central nervous system (CNS)	none	FALSE	1247.12	0	0	0	0	0	0	0	0	N/A	-	-
SJNBL042730_G1	FALSE	25.62	0.380822	Male	White	Neuroblastoma	none	FALSE	0	5650	0	183.721	0	0	0	0	0	N/A	-	-
SJNHL041611_G1	FALSE	41.16	8.37808	Male	White	Non-Hodgkin lymphoma	none	FALSE	991.04	3561.6	0	0	0	0	0	1410.85	10.4	N/A	-	-
SJHL041536_G1	FALSE	46.63	11.4959	Female	White	Hodgkin lymphoma	none	TRUE	2297.94	22460.3	0	0	0	0	0	0	39.5833	TRUE	-	-
SJRHB019832_G1	FALSE	42.57	9.2208	Female	White	Rhabdomyosarcoma	none	FALSE	646.24	9600	0	275	0	16	0	0	60	N/A	-	-
SJNBL019407_G1	FALSE	34.1	0.385448	Male	White	Neuroblastoma	none	TRUE	0	30290.3	957.447	525	0	0	1276.6	0	1.45161	N/A	-	-
SJEWS019199_G1	FALSE	40.48	5.11981	Male	White	Ewing sarcoma family of tumors	none	FALSE	0	8912.9	0	291.935	0	0	0	0	51.6129	N/A	-	-
SJHL019273_G1	FALSE	48.84	12.0082	Male	White	Hodgkin lymphoma	none	FALSE	635.48	0	0	0	0	0	0	0	0	FALSE	-	-
SJOS018799_G1	FALSE	57.08	15.8493	Male	White	Osteosarcoma	none	FALSE	0	5400	0	500	0	0	0	32950	0	N/A	-	-
SJWLM041695_G1	FALSE	35.04	3.34795	Male	White	Wilms tumor	none	FALSE	0	0	0	0	0	12.963	0	0	40.7407	N/A	-	MUTYH_P405L
SJRHB017944_G1	FALSE	53.42	20.4986	Female	White	Rhabdomyosarcoma	none	FALSE	468.38	11550	0	225	0	14.375	0	0	48.75	N/A	-	-
SJNBL041593_G1	FALSE	36.67	5.27397	Female	White	Neuroblastoma	none	TRUE	0	0	0	0	0	0	0	0	0	N/A	-	-
SJWLM019647_G1	FALSE	37.68	4.8137	Female	Black	Wilms tumor	none	FALSE	739.78	0	0	152.632	0	11.8421	0	0	50	N/A	-	-
SJWLM019650_G1	FALSE	34.29	0.49863	Male	White	Wilms tumor	none	FALSE	0	0	0	240.625	0	12.5	0	0	59.375	N/A	-	-
SJRHB019579_G1	FALSE	53.18	15.2921	Female	White	Rhabdomyosarcoma	none	TRUE	1346.16	10076.3	0	198.684	0	11.9205	0	0	37.7483	N/A	-	-
SJRHB042506_G1	FALSE	39.2	0.420765	Male	White	Rhabdomyosarcoma	none	TRUE	0	8400	0	144.444	0	11.1111	0	0	33.3333	N/A	-	-
SJEWS042714_G1	FALSE	36.81	3.60274	Female	White	Ewing sarcoma family of tumors	none	FALSE	833.64	11092.4	0	289.394	0	16.6667	0	0	57.5758	N/A	-	-
SJHL019276_G1	FALSE	40.99	6.50165	Female	Black	Hodgkin lymphoma	none	FALSE	1835.6	12622.2	0	0	0	0	0	0	45.5696	TRUE	-	-
SJWLM019844_G1	FALSE	34.18	3.82192	Female	White	Wilms tumor	none	FALSE	0	0	0	173.016	0	7.93651	0	0	41.2698	N/A	-	-
SJNHL041618_G1	FALSE	35.87	10.2469	Female	Black	Non-Hodgkin lymphoma	none	FALSE	973.04	3547.83	0	295.652	0	0	0	0	17.3913	N/A	-	-
SJNHL018783_G1	FALSE	40.78	13.1534	Male	White	Non-Hodgkin lymphoma	none	TRUE	469.84	2301.24	0	122.981	0	0	0	840.373	9.93789	N/A	-	-
SJNHL019463_G1	FALSE	35.43	4.94521	Female	White	Non-Hodgkin lymphoma	none	FALSE	0	5908.97	0	393.59	0	0	0	7041.5	14.1026	N/A	-	-
SJWLM019640_G1	FALSE	42.84	5.02466	Male	White	Wilms tumor	none	FALSE	282.34	0	0	262.667	0	14.6667	0	0	57.3333	N/A	-	-
SJWLM019639_G1	FALSE	42	4.44658	Female	White	Wilms tumor	none	FALSE	966.58	0	0	322.857	0	10.3939	0	0	44.3723	N/A	-	-
SJOS019532_G1	FALSE	40.73	14.937	Female	Black	Osteosarcoma	none	FALSE	0	9757.64	400	390.26	0	0	0	107987	0	N/A	-	-
SJHL018672_G1	FALSE	47.07	19.6575	Male	White	Hodgkin lymphoma	none	FALSE	2726.44	0	0	0	0	0	0	0	0	FALSE	-	-
SJRHB018842_G1	FALSE	40.5	13.6329	Male	White	Rhabdomyosarcoma	none	FALSE	439.84	2612.5	331.618	166.176	0	2.20588	0	0	19.1176	N/A	-	-
SJHL019262_G1	FALSE	52.2	14.4274	Female	White	Hodgkin lymphoma	none	TRUE	1716.4	15655	0	0	0	0	0	0	41.7808	TRUE	-	-
SJNBL042729_G1	FALSE	36.13	0.930496	Male	White	Neuroblastoma	none	FALSE	824.46	0	0	0	0	0	0	0	0	N/A	-	-
SJHL019252_G1	FALSE	55.98	14.526	Female	White	Hodgkin lymphoma	none	FALSE	2745.22	14751.1	0	0	0	0	0	0	59.2105	TRUE	-	-
SJAML019106_G1	FALSE	36.74	1.92877	Female	White	Acute myeloid leukemia	none	FALSE	0	5878.18	0	469.074	0	0	0	219.205	58.717	N/A	-	-
SJNBL041594_G1	FALSE	32.31	1.85912	Female	White	Neuroblastoma	none	FALSE	0	5256.6	0	176.786	0	0	0	0	0	N/A	-	-
SJHL019782_G1	FALSE	36.95	4.92877	Male	White	Hodgkin lymphoma	none	TRUE	0	0	0	0	0	0	0	0	0	FALSE	-	-
SJOS041636_G1	FALSE	46.37	14.5082	Male	White	Osteosarcoma	none	FALSE	0	5973.13	0	447.761	0	0	0	50000	0	N/A	-	-
SJNHL042519_G1	FALSE	49.39	13.0603	Female	White	Non-Hodgkin lymphoma	none	TRUE	252.08	0	0	0	0	0	0	0	0	N/A	-	-
SJWLM041698_G1	FALSE	31.73	0.909589	Female	Black	Wilms tumor	none	FALSE	0	0	0	0	0	5.26316	0	0	23.6842	N/A	-	-
SJNHL019441_G1	FALSE	55.77	15.3727	Male	Black	Non-Hodgkin lymphoma	none	TRUE	1402.9	7870.83	0	0	0	9.16667	0	0	38.3333	N/A	-	-
SJOS017933_G1	FALSE	53.89	14.2932	Male	Black	Osteosarcoma	none	FALSE	0	5976.92	0	473.846	0	0	0	34984.6	0	N/A	-	-
SJNBL019397_G1	FALSE	37.1	0.684932	Male	White	Neuroblastoma	none	FALSE	0	13347.3	0	455.263	0	0	0	0	0	N/A	-	-
SJEWS019200_G1	FALSE	46.52	13.6622	Male	White	Ewing sarcoma family of tumors	none	FALSE	0	20364.8	0	373.043	0	8.62069	0	0	16.3793	N/A	-	-
SJWLM019644_G1	FALSE	38.61	2.21644	Male	White	Wilms tumor	none	FALSE	603.58	0	0	154.545	0	9.09091	0	0	45.4545	N/A	-	-
SJRHB042762_G1	FALSE	48	15.5178	Male	White	Rhabdomyosarcoma	none	FALSE	0	1133.33	0	100	0	1.66667	0	0	4.44444	N/A	-	-
SJOS017935_G1	FALSE	43.96	10.9795	Female	White	Osteosarcoma	none	FALSE	0	6000	0	450.435	0	0	0	50000	0	N/A	-	-
SJWLM017954_G1	FALSE	32.81	3.09745	Male	White	Wilms tumor	none	FALSE	407.78	0	0	203.39	0	6.77966	0	0	40.678	N/A	-	-
SJOS019514_G1	FALSE	52.89	17.1288	Female	White	Osteosarcoma	none	FALSE	0	5400	0	378.571	0	0	0	50000	0	N/A	-	-
SJSTS019836_G1	FALSE	43.03	9.64932	Male	White	Soft tissue sarcoma	none	TRUE	0	1149.53	0	71.9626	0	0.934579	0	0	1.86916	N/A	-	-
SJWLM019637_G1	FALSE	45.91	6.37639	Female	White	Wilms tumor	none	FALSE	805.98	0	0	320.548	0	9.58904	0	0	56.1644	N/A	-	-
SJHL018660_G1	FALSE	46	10.1547	Male	White	Hodgkin lymphoma	none	FALSE	1025.92	0	0	0	0	0	0	0	0	FALSE	-	-
SJAML041900_G1	FALSE	29.67	0.158904	Female	White	Acute myeloid leukemia	none	FALSE	0	4009.3	0	264.409	0	0	6323.53	291.176	29.2683	N/A	-	-
SJHL018669_G1	FALSE	39.73	11.2356	Female	White	Hodgkin lymphoma	none	FALSE	637.04	7714.07	0	202.857	30	0	0	0	69.7835	TRUE	-	-
SJCNS041035_G1	FALSE	31.45	1.69589	Male	White	Central nervous system (CNS)	none	FALSE	2464.06	32222.1	789.474	0	0	0	0	0	48.2759	N/A	-	-
SJNBL019804_G1	FALSE	27.42	1.63014	Female	White	Neuroblastoma	none	FALSE	0	0	0	0	0	0	0	0	0	N/A	-	-
SJHL019309_G1	FALSE	46.92	18.8082	Female	White	Hodgkin lymphoma	none	FALSE	2801.64	0	0	0	0	0	0	0	0	FALSE	-	-
SJNBL018743_G1	FALSE	28.09	0.933064	Female	White	Neuroblastoma	none	FALSE	0	0	0	0	0	0	0	0	0	N/A	-	-
SJNHL019474_G1	FALSE	42.34	15.4658	Male	White	Non-Hodgkin lymphoma	none	FALSE	1577.64	2230.07	0	118.954	0	0	0	592.81	7.84314	N/A	-	-
SJHL019310_G1	FALSE	35	6.06849	Male	White	Hodgkin lymphoma	none	FALSE	959.64	0	0	0	0	0	0	0	0	FALSE	-	-
SJHL017903_G1	FALSE	42.11	17.3701	Male	White	Hodgkin lymphoma	none	FALSE	2801.64	0	0	0	0	0	0	0	0	FALSE	-	-
SJHL041533_G1	FALSE	50.35	13.9169	Female	White	Hodgkin lymphoma	none	FALSE	1332.46	0	0	0	0	0	0	0	0	FALSE	-	-
SJHL041554_G1	FALSE	36.69	13.1273	Male	White	Hodgkin lymphoma	none	FALSE	1385	0	0	0	0	0	0	0	0	FALSE	-	-
SJNHL019475_G1	FALSE	36.05	7.89589	Female	White	Non-Hodgkin lymphoma	none	FALSE	0	7248.42	0	452.632	0	0	4032	255.789	32.6316	N/A	-	-
SJNBL019416_G1	FALSE	28.07	0.369863	Female	White	Neuroblastoma	none	FALSE	0	0	0	0	0	0	0	0	0	N/A	-	-
SJHL019786_G1	FALSE	32.08	7.02192	Male	White	Hodgkin lymphoma	none	FALSE	531.24	8418.75	0	203.896	55.8442	0	0	0	70.6006	TRUE	-	-
SJHL019306_G1	FALSE	42.17	12.4646	Male	White	Hodgkin lymphoma	none	FALSE	667.44	7683.91	0	194.776	58.9552	0	0	0	65.9126	TRUE	-	-
SJWLM019673_G1	FALSE	31.35	5.7898	Female	White	Wilms tumor	none	FALSE	407.78	0	0	142.353	0	8.23529	0	0	38.8235	N/A	-	-
SJNHL019470_G1	FALSE	41.89	11.8603	Female	Black	Non-Hodgkin lymphoma	none	FALSE	575.42	8429.79	0	301.709	0	0	0	48000	13.6752	N/A	-	FANCC_S119_H120fs
SJNHL042737_G1	FALSE	39.3	15.2795	Female	Black	Non-Hodgkin lymphoma	none	FALSE	0	2186.84	0	116.316	0	0	0	561.89	7.36842	N/A	-	-
SJHL019311_G1	FALSE	43.01	14.5507	Female	White	Hodgkin lymphoma	none	FALSE	1828.02	0	0	0	0	0	0	0	0	FALSE	-	-
SJHL019312_G1	FALSE	38.54	11.4986	Female	White	Hodgkin lymphoma	none	FALSE	989.18	8934.46	0	194.512	20.122	0	0	0	70.0915	TRUE	-	-
SJHL019263_G1	FALSE	47.18	9.83562	Male	White	Hodgkin lymphoma	none	FALSE	2404.44	24373.4	0	0	0	0	0	0	87.1287	TRUE	-	-
SJRHB041677_G1	FALSE	41.46	4.9726	Male	White	Rhabdomyosarcoma	none	FALSE	0	14615.6	0	340.625	0	18.75	0	0	31.25	N/A	-	-
SJNBL018730_G1	FALSE	41.22	0.114754	Male	White	Neuroblastoma	none	FALSE	101.42	0	0	0	0	0	0	0	0	N/A	-	-
SJAML018553_G1	FALSE	36.85	2.67903	Male	White	Acute myeloid leukemia	none	FALSE	0	0	0	373.585	0	0	2215.69	140.385	0	N/A	-	-
SJNHL017926_G1	FALSE	38.53	7.00475	Male	White	Non-Hodgkin lymphoma	none	FALSE	442.12	0	0	0	0	0	4656.57	3835.77	12.1212	N/A	-	-
SJNHL018768_G1	FALSE	46.25	12.6974	Female	White	Non-Hodgkin lymphoma	none	FALSE	165.1	1770.83	0	0	0	0	0	1882.18	8.33333	N/A	-	-
SJNBL019385_G1	FALSE	41.71	1.48572	Female	White	Neuroblastoma	none	FALSE	702.1	8514.29	0	0	0	0.47619	0	0	30.9524	N/A	-	-
SJWLM018886_G1	FALSE	36.36	0.810959	Male	Black	Wilms tumor	none	FALSE	470.38	0	0	0	0	11.9048	0	0	40.4762	N/A	-	RAD50_Y625*
SJHL019281_G1	FALSE	45.68	12.7064	Male	White	Hodgkin lymphoma	none	FALSE	1630.7	0	0	0	0	0	0	0	0	FALSE	-	-
SJOS018801_G1	FALSE	52.68	16.2411	Female	White	Osteosarcoma	none	FALSE	0	6000	0	525.385	0	0	0	50000	0	N/A	-	-
SJOS019517_G1	FALSE	53.42	20.3232	Male	White	Osteosarcoma	none	FALSE	0	6184.27	0	454.494	0	0	0	51544.9	0	N/A	-	-
SJHL019250_G1	FALSE	49.17	5.34247	Male	White	Hodgkin lymphoma	none	FALSE	786.9	2359.55	0	0	0	0	0	0	12.3596	FALSE	-	-
SJNBL019402_G1	FALSE	34.2	0.536986	Male	White	Neuroblastoma	none	TRUE	0	6351.22	0	213.333	0	0	0	0	0	N/A	-	-
SJWLM041696_G1	FALSE	36.32	4.43562	Female	White	Wilms tumor	none	FALSE	734.78	0	0	164.615	0	12.3077	0	0	55.3846	N/A	-	-
SJHL018658_G1	FALSE	51.19	14.9534	Female	White	Hodgkin lymphoma	none	TRUE	2773.92	12284.8	0	0	0	0	0	0	24.359	TRUE	-	-
SJNBL019401_G1	FALSE	32.27	0.512329	Male	White	Neuroblastoma	none	FALSE	0	6300	0	140	0	0	0	0	0	N/A	-	-
SJNHL019459_G1	FALSE	37.75	5.99081	Male	White	Non-Hodgkin lymphoma	none	TRUE	1470.46	3545.45	0	111.842	0	0	0	58.4416	6.57895	N/A	-	-
SJNHL041610_G1	FALSE	38.47	5.42666	Female	White	Non-Hodgkin lymphoma	none	FALSE	1352.48	3617.39	0	0	0	0	0	1434.78	10.1449	N/A	-	-
SJHL017908_G1	FALSE	41.58	5.65051	Male	Black	Hodgkin lymphoma	none	FALSE	912.58	0	0	0	0	0	0	0	0	FALSE	-	-
SJNHL019458_G1	FALSE	39.73	7.2949	Male	White	Non-Hodgkin lymphoma	none	FALSE	1382.06	4020.51	0	45.8716	0	0	0	86.3248	2.75229	N/A	-	-
SJOS019518_G1	FALSE	41.75	9.21234	Female	White	Osteosarcoma	none	FALSE	0	5405.13	0	450	0	0	0	50000	0	N/A	-	-
SJNHL019453_G1	FALSE	45.38	11.9644	Female	White	Non-Hodgkin lymphoma	none	FALSE	1088.72	3736.59	0	0	0	0	0	1924.24	10.5691	N/A	-	-
SJRHB018839_G1	FALSE	36.28	0.106849	Male	White	Rhabdomyosarcoma	none	TRUE	0	9010.71	0	289.286	0	10.7143	0	0	46.4286	N/A	-	-
SJAML019102_G1	FALSE	37.42	1.20548	Female	White	Acute myeloid leukemia	none	TRUE	681.02	6843.18	0	501.486	0	0	0	578.283	54.7619	N/A	-	-
SJHL018659_G1	FALSE	43.01	8.42192	Male	White	Hodgkin lymphoma	none	TRUE	2189.84	10928.3	0	0	0	0	0	0	42.5532	TRUE	-	-
SJHL019783_G1	FALSE	37.13	5.79452	Male	White	Hodgkin lymphoma	none	FALSE	0	12766.8	0	0	0	0	0	0	35.7143	TRUE	-	-
SJNHL017928_G1	FALSE	48.73	17.1854	Male	Black	Non-Hodgkin lymphoma	none	FALSE	379.48	1800	0	0	0	0	0	1226.13	6.15385	N/A	-	-
SJSTS041645_G1	FALSE	44.13	13.1753	Female	White	Other malignancy	none	FALSE	449.94	11549.7	0	187.075	0	15.1724	0	0	53.7931	N/A	-	-
SJHL018653_G1	FALSE	55.79	15.2082	Male	White	Hodgkin lymphoma	none	TRUE	0	41311	0	0	0	0	0	0	62.8415	TRUE	PMS2_S270*	PMS2_S270*
SJNHL019806_G1	FALSE	34.65	3.82192	Male	White	Non-Hodgkin lymphoma	none	TRUE	1470.46	3600	0	248.333	0	0	0	60	10	N/A	-	-
SJAML041898_G1	FALSE	42.82	9.91233	Female	White	Acute myeloid leukemia	none	FALSE	0	7412.4	0	374.343	0	0	0	219.48	59.0694	N/A	-	-
SJHL019280_G1	FALSE	46.75	12.9918	Female	White	Hodgkin lymphoma	none	TRUE	1598.22	18985.7	0	0	0	0	0	0	151.203	TRUE	-	-
SJRHB019582_G1	FALSE	37.78	5.90596	Female	White	Rhabdomyosarcoma	none	TRUE	0	12181.8	0	259.74	0	15.5844	0	0	61.039	N/A	-	-
SJALL019097_G1	FALSE	19.98	2.72541	Female	White	Wilms tumor	none	FALSE	310.18	0	0	174.576	0	8.47458	0	0	38.9831	N/A	-	-
SJNBL019404_G1	FALSE	32.71	0.774953	Female	White	Neuroblastoma	none	FALSE	0	6141.83	0	213.725	0	0	0	0	0	N/A	-	-
SJRHB019581_G1	FALSE	48.4	15.2842	Male	Black	Rhabdomyosarcoma	none	TRUE	768.22	6052.2	0	226.415	0	8.22785	0	0	26.5823	N/A	-	XRCC4_R161*
SJNHL019452_G1	FALSE	51.85	15.1589	Male	White	Non-Hodgkin lymphoma	none	FALSE	537.88	3483.87	0	0	0	0	0	2520	9.03226	N/A	-	-
SJHL019274_G1	FALSE	47.71	13.9371	Male	White	Hodgkin lymphoma	none	FALSE	1593.3	0	0	0	0	0	0	0	0	FALSE	-	-
SJRHB042761_G1	FALSE	36.84	3.30137	Female	White	Rhabdomyosarcoma	none	TRUE	876.6	7049.18	0	245.902	0	6.55738	0	0	42.623	N/A	-	-
SJNBL042518_G1	FALSE	39.21	0.0437158	Male	White	Neuroblastoma	none	FALSE	0	15152.2	0	604.348	0	0	0	0	0	N/A	-	-
SJWLM019646_G1	FALSE	36.75	2.75342	Female	White	Wilms tumor	none	FALSE	197.02	0	0	125.862	0	5.17241	0	0	27.5862	N/A	-	-
SJNBL018738_G1	FALSE	47.66	12.1479	Male	White	Neuroblastoma	none	FALSE	0	0	0	0	0	0	0	0	0	N/A	-	-
SJCML042516_G1	FALSE	49.71	15.7616	Female	Black	Chronic myeloid leukemia	none	FALSE	0	0	0	0	0	0	0	0	0	N/A	-	-
SJSTS019610_G1	FALSE	34.41	6.77806	Female	Black	Soft tissue sarcoma	none	TRUE	862.12	8103.24	0	119.792	0	4.16667	0	0	6.16667	N/A	-	-
SJHL041535_G1	FALSE	53.65	18.2356	Male	White	Hodgkin lymphoma	none	FALSE	0	27775	0	0	0	0	0	0	57.4257	TRUE	-	-
SJWLM042770_G1	FALSE	25.65	0.526027	Male	White	Wilms tumor	none	FALSE	123.92	0	0	172.131	0	9.5692	0	0	43.8811	N/A	WT1_L391fs	-
SJALL041026_G1	FALSE	49.46	17.3671	Male	White	Acute lymphoblastic leukemia	none	TRUE	207.54	8218.85	0	101.047	0	0	3943.59	549.172	57.3811	N/A	-	-
SJWLM043455_G1	FALSE	43.2	0.8872	Female	White	Wilms tumor	none	FALSE	166.92	0	0	276.316	0	13.1579	0	0	71.0526	N/A	-	-
SJNBL041590_G1	FALSE	47.95	0.090411	Female	White	Neuroblastoma	none	FALSE	0	8678.26	0	0	0	0	0	0	43.4783	N/A	-	-
SJALL018398_G1	FALSE	51.23	2.02466	Female	White	Acute lymphoblastic leukemia	none	TRUE	400.91	18300	0	0	0	0	0	0	92	N/A	-	-
SJWLM018874_G1	FALSE	52.05	1.8274	Male	Black	Wilms tumor	none	FALSE	235.72	0	0	0	0	0	0	0	0	N/A	-	-
SJWLM017958_G1	FALSE	53.63	5.47123	Female	White	Wilms tumor	none	TRUE	384.34	0	0	0	0	2.38095	0	0	5.95238	N/A	-	-
SJNBL019398_G1	FALSE	37.71	1.05205	Female	White	Neuroblastoma	none	FALSE	559.7	6903.66	0	142.5	0	0	0	0	0	N/A	-	-
SJALL018921_G1	FALSE	62.15	11.4208	Male	White	Acute lymphoblastic leukemia	none	FALSE	895.82	19764.3	0	0	0	0	0	2156.43	63.1944	N/A	-	-
SJWLM019628_G1	FALSE	54.83	5.83008	Female	Black	Wilms tumor	none	FALSE	632.18	0	0	0	0	3.57143	0	0	11.9048	N/A	-	-
SJRB019554_G1	FALSE	49.75	0.719725	Male	White	Retinoblastoma	none	FALSE	279.52	3000	0	0	0	0	0	0	0	N/A	-	-
SJALL018399_G1	FALSE	50.87	1.54368	Male	White	Acute lymphoblastic leukemia	none	FALSE	912.66	19520	0	0	0	0	0	1534	100	N/A	-	-
SJCML018604_G1	FALSE	50.03	1.48203	Female	White	Chronic myeloid leukemia	none	FALSE	0		0	0	0	0	0	0	0	N/A	CBL_Y371H	-
SJNHL017925_G1	FALSE	49.02	1.85589	Male	White	Non-Hodgkin lymphoma	none	FALSE	189.96	0	0	0	0	0	0	0	0	N/A	-	-
SJNHL018758_G1	FALSE	59.37	9.58983	Male	White	Non-Hodgkin lymphoma	none	FALSE	823.08	0	0	0	0	0	0	0	0	N/A	-	-
SJEWS019194_G1	FALSE	66.43	16.6393	Male	White	Ewing sarcoma family of tumors	none	FALSE	612.64	8387.64	0	0	0	0	0	0	24.1573	N/A	-	-
SJALL018922_G1	FALSE	54.29	4.30328	Male	White	Acute lymphoblastic leukemia	none	FALSE	788.16	13476.3	0	0	0	0	0	1347.37	64.4737	N/A	-	-
SJNBL019379_G1	FALSE	48.2	0.0657534	Male	White	Neuroblastoma	none	FALSE	196.82	0	0	0	0	0	0	0	0	N/A	-	-
SJEWS018606_G1	FALSE	55.14	7.70959	Male	White	Ewing sarcoma family of tumors	none	FALSE	987.28	5663.27	0	0	0	0	0	0	38.7755	N/A	-	-
SJWLM018875_G1	FALSE	52.8	4.50959	Female	White	Wilms tumor	none	FALSE	646.78	0	0	0	0	0	0	0	0	N/A	-	-
SJNHL042731_G1	FALSE	51.52	5.1737	Male	White	Non-Hodgkin lymphoma	none	FALSE	180.6	0	0	0	0	0	0	0	0	N/A	-	-
SJNHL041626_G1	FALSE	30.23	8.9575	Male	White	Non-Hodgkin lymphoma	none	FALSE	0	2100	0	300	30.7018	0	0	1310.53	9.64912	N/A	BRCA2_Q3066*	BRCA2_Q3066*
SJAML018562_G1	FALSE	30.24	14.9534	Female	White	Acute myeloid leukemia	autologous	FALSE	0	0	0	88.9	0	0	790.9	20.6	0	N/A	-	-
SJOS019533_G1	FALSE	38.3	11.2205	Male	Other	Osteosarcoma	none	FALSE	0	9795.42	387.5	232.143	0	0	0	108321	0	N/A	-	-
SJALL042674_G1	FALSE	38.43	16.9644	Female	White	Acute lymphoblastic leukemia	none	FALSE	0	0	0	24.0385	0	0	3052.86	11653.5	5.12821	N/A	-	-
SJHL019343_G1	FALSE	37.39	15.8712	Female	White	Hodgkin lymphoma	none	FALSE	1009	0	0	293.827	0	0	2351.85	0	70.3704	FALSE	-	-
SJHL018685_G1	FALSE	39.51	16.6658	Male	White	Hodgkin lymphoma	none	FALSE	1855.12	0	0	0	0	0	0	0	0	FALSE	-	-
SJALL041386_G1	FALSE	25.51	4.60496	Male	White	Acute lymphoblastic leukemia	none	FALSE	337.12	7909.86	0	25	0	0	12803.9	4228.97	52.8571	N/A	-	-
SJNHL042741_G1	FALSE	31.2	9.63562	Male	White	Non-Hodgkin lymphoma	none	FALSE	0	8211.24	0	151.961	0	0	0	4347.23	12.3596	N/A	-	-
SJHL019353_G1	FALSE	34.91	15.3479	Male	White	Hodgkin lymphoma	none	FALSE	1009	5400	0	151.5	0	0	0	121	42.5	TRUE	-	-
SJALL041440_G1	FALSE	22.11	2.90548	Male	White	Acute lymphoblastic leukemia	none	FALSE	0	937.5	0	98.3607	0	0	0	2048.54	94.386	N/A	-	-
SJALL019043_G1	FALSE	33.92	6.47344	Male	White	Acute lymphoblastic leukemia	none	FALSE	337.12	9964.08	0	24.2718	0	0	15220.7	4163.11	56.3107	N/A	-	-
SJHL018719_G1	FALSE	36.9	19.5597	Female	White	Hodgkin lymphoma	none	FALSE	1976.44	6911.87	0	121.296	38.4259	0	0	0	28.782	TRUE	-	-
SJNHL018791_G1	FALSE	38.52	16.5852	Male	White	Non-Hodgkin lymphoma	none	FALSE	0	3128.89	3735.59	191.667	0	0	0	229.793	7.77778	N/A	-	-
SJHL041570_G1	FALSE	31.37	13.962	Female	Black	Hodgkin lymphoma	none	FALSE	190.9	7100	0	150	0	0	0	120	42.7778	TRUE	-	-
SJALL041859_G1	FALSE	35.09	13.9863	Male	White	Acute lymphoblastic leukemia	none	FALSE	0	10625.9	0	53.7931	0	0	17167.2	27617.4	51.0345	N/A	-	-
SJALL042671_G1	FALSE	26.85	4.33141	Male	White	Acute lymphoblastic leukemia	none	FALSE	0	0	0	24.3056	0	0	3305.56	11655.6	5.55556	N/A	-	-
SJNHL043134_G1	FALSE	44.69	16.5863	Male	White	Non-Hodgkin lymphoma	none	FALSE	977.7	2250.57	0	120.115	0	0	0	726.554	8.04598	N/A	-	-
SJOS041640_G1	FALSE	39.8	18.1205	Male	White	Osteosarcoma	none	FALSE	0	9748.33	395.152	532.727	0	0	0	106691	0	N/A	-	-
SJHL018709_G1	FALSE	34.61	16.7315	Female	White	Hodgkin lymphoma	none	FALSE	1009	0	0	208.667	0	0	0	166	50	FALSE	-	-
SJHL018705_G1	FALSE	37.07	16.3178	Female	White	Hodgkin lymphoma	none	FALSE	1009	0	0	214.451	0	0	0	163.006	49.711	FALSE	-	-
SJNHL042751_G1	FALSE	32.11	14.6356	Female	White	Non-Hodgkin lymphoma	none	FALSE	0	8913.29	0	54.6243	0	0	13919.2	21829.3	41.6185	N/A	-	-
SJHL018703_G1	FALSE	38.09	17.6521	Male	White	Hodgkin lymphoma	none	FALSE	2262.04	0	0	305.14	0	0	2266.36	0	72.8972	FALSE	-	-
SJWLM019692_G1	FALSE	27.9	5.22146	Male	White	Wilms tumor	none	FALSE	634.36	0	0	174.699	0	2.40964	0	0	19.2771	N/A	-	-
SJALL041381_G1	FALSE	26.91	4.78072	Male	White	Acute lymphoblastic leukemia	none	FALSE	0	0	0	24.6479	0	0	611.268	4124.72	54.9296	N/A	-	-
SJALL040964_G1	FALSE	27.62	7.36164	Male	White	Acute lymphoblastic leukemia	none	FALSE	0	0	0	516.277	0	0	0	93.3333	86.6667	N/A	-	-
SJNHL041631_G1	FALSE	26.51	7.84699	Female	White	Non-Hodgkin lymphoma	none	FALSE	0	2319.79	0	122.917	0	0	0	0	10.4167	N/A	-	-
SJOS019539_G1	FALSE	37.57	15.6603	Male	White	Osteosarcoma	none	FALSE	0	0	0	0	0	0	0	0	0	N/A	-	-
SJOS018812_G1	FALSE	39.05	15.4466	Male	White	Osteosarcoma	none	TRUE	0	3911.18	400	354.749	0	0	0	108000	0	N/A	-	FANCG_W599_P602fs
SJNHL019498_G1	FALSE	35.1	17.1868	Male	White	Non-Hodgkin lymphoma	none	TRUE	0	5669.65	0	175.097	0	0	0	14509.7	3.89105	N/A	-	-
SJALL018548_G1	FALSE	28.62	12.0247	Female	White	Acute lymphoblastic leukemia	none	FALSE	0	8961.44	0	51.3699	0	0	15204.1	25398.4	50.6849	N/A	-	-
SJEWS041502_G1	FALSE	32.4	12.3089	Female	White	Ewing sarcoma family of tumors	none	FALSE	1371.48	21554.3	0	319.186	0	8	3075.74	0	19.4286	N/A	-	-
SJNHL019485_G1	FALSE	39.97	15.1345	Female	Black	Non-Hodgkin lymphoma	none	FALSE	0	6404.79	0	101.84	0	0	3673.21	101.227	8.58896	N/A	-	-
SJNHL019483_G1	FALSE	38.67	14.026	Male	White	Non-Hodgkin lymphoma	none	FALSE	0	2345.05	0	125.275	0	0	0	487.374	7.69231	N/A	-	-
SJWLM019703_G1	FALSE	25.68	8.70411	Male	White	Wilms tumor	none	FALSE	572.24	9000	2709.38	284.694	0	6.96747	2700	0	30.0223	N/A	-	-
SJHL018720_G1	FALSE	32.95	16.123	Male	White	Hodgkin lymphoma	none	TRUE	1976.44	6846.39	0	150.23	0	0	0	119.816	40.4529	TRUE	-	-
SJNHL042852_G1	FALSE	32.73	11.6767	Male	White	Non-Hodgkin lymphoma	none	FALSE	0	5816.18	42.8571	191.471	0	0	0	12379.3	5.10949	N/A	-	-
SJALL041401_G2	FALSE	28.3	1.8411	Male	White	Acute lymphoblastic leukemia	none	FALSE	516.02	0	0	25.4098	0	0	2989.66	8064.73	4.91803	N/A	-	-
SJALL041862_G1	FALSE	34.03	15.4274	Female	White	Acute lymphoblastic leukemia	none	FALSE	0	0	0	48.0392	0	0	1208.28	23394.2	47.0588	N/A	-	-
SJALL019078_G1	FALSE	24.22	6.06849	Male	White	Acute lymphoblastic leukemia	none	FALSE	337.12	8844.83	0	50.5952	0	0	15563.4	23147.5	58.3333	N/A	-	-
SJHL019790_G1	FALSE	35.89	17.9342	Female	White	Hodgkin lymphoma	none	TRUE	1009	0	0	318.675	0	0	2549.4	0	72.2892	FALSE	-	-
SJHL019791_G1	FALSE	27.89	10.0603	Male	White	Hodgkin lymphoma	none	FALSE	819.44	0	0	300	0	0	2400	0	71.8182	FALSE	-	-
SJCNS041493_G1	FALSE	25.08	10.1753	Male	White	Central nervous system (CNS)	none	FALSE	3175.72	15676.8	282.418	0	0	0	929.67	0	16.1616	N/A	-	-
SJEWS018617_G1	FALSE	42.32	16.9467	Male	White	Ewing sarcoma family of tumors	none	FALSE	1238.8	11068.8	0	340.462	0	4.7619	0	0	9.52381	N/A	-	-
SJAML041471_G1	FALSE	31.36	13.2094	Female	White	Acute myeloid leukemia	none	FALSE	0	0	0	147.277	0	0	795.05	0	0	N/A	-	-
SJCNS019171_G1	FALSE	26.69	8.16164	Male	White	Central nervous system (CNS)	none	FALSE	2857.52	15745.1	280	0	0	0	925	0	15.6863	N/A	-	POLG_G848S
SJALL041410_G2	FALSE	38.58	12.326	Male	White	Acute lymphoblastic leukemia	none	FALSE	0	0	0	36.5385	0	0	2453.66	8101.54	5.51181	N/A	-	-
SJALL041414_G1	FALSE	22.74	2.29041	Male	White	Acute lymphoblastic leukemia	none	FALSE	0	0	0	25.3846	0	0	3268.18	18572.5	6.15385	N/A	-	-
SJCNS019758_G1	FALSE	28.96	8.58356	Female	Black	Central nervous system (CNS)	none	FALSE	862.14	0	0	0	0	0	0	0	0	N/A	-	-
SJALL041370_G2	FALSE	42.18	14.0822	Male	White	Acute lymphoblastic leukemia	none	FALSE	207.54	9087.88	0	25	0	0	14369.6	4089.36	36.1702	N/A	-	-
SJALL041429_G2	FALSE	29.68	5.37534	Female	White	Acute lymphoblastic leukemia	none	FALSE	0	0	0	26.9841	0	0	1257.53	10137.9	6.34921	N/A	BRCA2_S1982fs	BRCA2_S1982fs
SJALL041425_G1	FALSE	23.03	3.21457	Male	White	Acute lymphoblastic leukemia	none	FALSE	337.12	0	0	25	0	0	1432.35	18533.7	5.88235	N/A	-	-
SJALL018502_G1	FALSE	31.68	8.39145	Female	White	Acute lymphoblastic leukemia	none	FALSE	0	0	0	24.6032	0	0	2598.36	8148.46	3.96825	N/A	-	-
SJALL019050_G1	FALSE	38.29	15.8027	Female	White	Acute lymphoblastic leukemia	none	FALSE	0	0	0	37.1212	0	0	5605.76	18478.3	4.0404	N/A	-	-
SJALL041453_G1	FALSE	21.65	6.03288	Female	White	Acute lymphoblastic leukemia	none	FALSE	0	8374.39	0	52.1341	0	0	14561.2	23997.6	56.8659	N/A	-	-
SJALL041421_G2	FALSE	27.16	2.22995	Male	White	Acute lymphoblastic leukemia	none	FALSE	0	0	0	36.6071	0	0	1679.63	12413.2	5.35714	N/A	-	-
SJALL041402_G1	FALSE	24.15	2.99178	Female	White	Acute lymphoblastic leukemia	none	FALSE	0	0	0	25.4237	0	0	2957.38	13461.5	6.77966	N/A	-	-
SJALL040953_G1	FALSE	30.19	8.64384	Male	White	Acute lymphoblastic leukemia	none	FALSE	0	9295.1	0	25.5319	0	0	14978.2	24391.3	63.8298	N/A	-	-
SJCNS018568_G1	FALSE	27.13	0.432877	Male	Other	Central nervous system (CNS)	none	FALSE	1614.66	28792.3	84.3137	0	0	0	274.51	0	53.8462	N/A	-	-
SJALL019040_G1	FALSE	26.93	1.67671	Female	White	Acute lymphoblastic leukemia	none	FALSE	516.02	10211.5	0	25.5319	0	0	16555.6	5645.99	63.8298	N/A	-	-
SJALL019046_G1	FALSE	33.45	7.74521	Male	Black	Acute lymphoblastic leukemia	none	FALSE	0	0	0	0	0	0	0	3810.91	75.4545	N/A	-	-
SJALL041407_G1	FALSE	23.13	1.90411	Male	White	Acute lymphoblastic leukemia	none	FALSE	1341.76	5203.66	0	391.159	0	0	4875.98	18102.6	46.5823	N/A	-	-
SJCNS018573_G1	FALSE	21.74	3.37534	Male	White	Central nervous system (CNS)	none	FALSE	1247.12	0	0	0	0	0	0	0	0	N/A	-	-
SJALL040959_G1	FALSE	27.03	6.38153	Male	White	Acute lymphoblastic leukemia	none	FALSE	0	10003.5	0	52.3529	0	0	16638.8	24304.7	60	N/A	-	-
SJALL042673_G1	FALSE	35.79	14.2411	Female	White	Acute lymphoblastic leukemia	none	FALSE	0	0	0	36.7284	0	0	2408.64	11652.5	4.93827	N/A	-	-
SJHL018706_G1	FALSE	31.02	13.0055	Male	White	Hodgkin lymphoma	none	FALSE	143.6	0	0	210.778	0	0	0	167.665	50.2994	FALSE	-	-
SJALL019047_G1	FALSE	27.94	5.22604	Female	White	Acute lymphoblastic leukemia	none	FALSE	0	0	0	25.6579	0	0	3452.38	14437.3	6.25	N/A	-	-
SJNHL019487_G1	FALSE	30.82	5.87123	Male	White	Non-Hodgkin lymphoma	none	FALSE	0	2310.34	0	124.138	0	0	0	55.1724	10.3448	N/A	-	-
SJCNS018570_G1	FALSE	36.73	11.9098	Female	White	Central nervous system (CNS)	none	FALSE	0	0	0	0	0	0	0	0	0	N/A	-	-
SJCNS019170_G1	FALSE	27.89	8.29863	Female	White	Central nervous system (CNS)	none	FALSE	4084.52	0	871.579	0	0	0	0	0	0	N/A	-	-
SJALL018539_G1	FALSE	32.66	14.6466	Male	White	Acute lymphoblastic leukemia	none	FALSE	0	8271.88	0	52.6738	0	0	17120.9	23534.3	37.4332	N/A	-	-
SJHL019356_G1	FALSE	35.45	16.9041	Male	White	Hodgkin lymphoma	none	FALSE	1009	7949.03	0	154.118	0	0	0	121.765	42.7005	TRUE	-	-
SJALL041406_G1	FALSE	25.11	3.97808	Female	White	Acute lymphoblastic leukemia	none	TRUE	0	0	0	25	0	0	2432	11470.3	5.55556	N/A	-	LIG4_K424_R425fs
SJEWS041508_G1	FALSE	22.98	8.70685	Male	White	Ewing sarcoma family of tumors	none	FALSE	2458.92	26355.4	0	333.673	0	1.02041	3796.94	0	27.551	N/A	-	-
SJALL019048_G1	FALSE	27.15	3.53425	Male	White	Acute lymphoblastic leukemia	none	FALSE	337.12	0	0	25.3521	0	0	1718.31	12549.3	5.6338	N/A	-	-
SJWLM019679_G1	FALSE	30.12	4.13115	Male	White	Wilms tumor	none	FALSE	0	0	0	210.843	0	8.04598	0	0	39.0805	N/A	-	-
SJALL004182_G1	FALSE	32.37	14.3233	Male	White	Acute lymphoblastic leukemia	allogeneic	FALSE	0	0	0	0	0	0	0	0	0	N/A	-	-
SJHL018708_G1	FALSE	30.97	12.2603	Male	White	Hodgkin lymphoma	none	FALSE	1299.36	7033.47	0	157.143	0	0	0	114.286	44.2857	TRUE	-	-
SJWLM019693_G1	FALSE	26.09	6.16922	Female	Black	Wilms tumor	none	FALSE	0	0	0	175	0	2.38095	0	0	19.0476	N/A	-	-
SJALL040944_G1	FALSE	31.01	6.93732	Female	White	Acute lymphoblastic leukemia	none	FALSE	337.12	0	0	24.6753	0	0	1866.67	13383.3	6.49351	N/A	-	-
SJALL041419_G1	FALSE	23.44	3.5726	Female	White	Acute lymphoblastic leukemia	none	FALSE	337.12	0	0	25.7812	0	0	3309.23	10296.2	4.6875	N/A	-	-
SJRHB003949_G2	FALSE	28.68	6.11194	Male	White	Rhabdomyosarcoma	none	FALSE	1194.16	15561.7	0	337.363	0	6.59341	0	0	36.2637	N/A	-	-
SJHL019317_G1	FALSE	41.51	13.9808	Female	White	Hodgkin lymphoma	none	TRUE	1740.64	8714.61	0	149.153	58.7571	0	0	0	55.2498	TRUE	-	-
SJALL041442_G1	FALSE	31.76	14.8915	Female	White	Acute lymphoblastic leukemia	none	FALSE	0	8111.66	0	51.25	0	0	12028.2	20328	40	N/A	-	-
SJALL041416_G1	FALSE	25.03	3.59726	Male	White	Acute lymphoblastic leukemia	none	FALSE	0	0	0	25	0	0	2961.04	18863.9	5.71429	N/A	-	-
SJHL018680_G1	FALSE	41.27	15.311	Female	White	Hodgkin lymphoma	none	TRUE	2149.32	10182.2	0	208	10	0	0	0	84.8322	TRUE	-	-
SJHL018704_G1	FALSE	38.84	18.3562	Female	White	Hodgkin lymphoma	none	FALSE	1753.04	0	0	300	0	0	2400	0	69.7674	FALSE	-	-
SJWLM019685_G1	FALSE	24.19	2.18904	Male	White	Wilms tumor	none	FALSE	0	0	0	0	0	2.38095	0	0	9.52381	N/A	-	-
SJNHL042744_G1	FALSE	24.21	4.0274	Male	White	Non-Hodgkin lymphoma	none	FALSE	0	6607.06	0	184.706	0	0	0	4061.5	9.41176	N/A	-	-
SJALL041363_G1	FALSE	24.9	2.39371	Male	White	Acute lymphoblastic leukemia	none	FALSE	516.02	9822.41	0	24.1667	0	0	15857.4	4213.33	51.6667	N/A	-	-
SJHL019347_G1	FALSE	31.9	11.8959	Male	White	Hodgkin lymphoma	none	FALSE	1299.36	7350.91	0	159.155	0	0	0	127.465	46.4789	TRUE	-	-
SJALL041372_G1	FALSE	29.46	6.09041	Male	White	Acute lymphoblastic leukemia	none	FALSE	0	0	0	25	0	0	600	4138.46	57.6923	N/A	-	-
SJHL019346_G1	FALSE	34.41	14.2822	Male	White	Hodgkin lymphoma	none	FALSE	2131.14	9018.61	0	220.635	0	0	1746.03	0	63.6486	TRUE	FH_R343*	-
SJNHL041624_G1	FALSE	34.04	11.2969	Male	White	Non-Hodgkin lymphoma	none	FALSE	0	2250	0	120.312	0	0	0	906.716	10.9375	N/A	-	-
SJNHL042753_G1	FALSE	24.02	7.2411	Male	White	Non-Hodgkin lymphoma	none	FALSE	0	5453.06	0	174.49	0	0	0	17507.1	9.18367	N/A	-	-
SJEWS041504_G1	FALSE	28.28	9.37082	Male	White	Ewing sarcoma family of tumors	none	FALSE	1870.48	21466.9	0	316.19	0	10	3185	0	25.4545	N/A	-	-
SJOS018822_G1	FALSE	28.6	10.211	Female	White	Osteosarcoma	none	FALSE	785.94	5845.21	2057.52	336.538	0	0	0	0	0	N/A	-	-
SJALL017875_G1	FALSE	28.79	8.07671	Female	White	Acute lymphoblastic leukemia	none	FALSE	0	0	0	25	0	0	2580.77	7518.39	6	N/A	-	-
SJNHL018794_G1	FALSE	30.54	11.937	Male	White	Non-Hodgkin lymphoma	none	FALSE	0	3057.69	0	121.154	0	0	0	0	5.12821	N/A	-	-
SJOS019544_G1	FALSE	34.9	17.189	Female	White	Osteosarcoma	none	FALSE	0	9465.09	2729.27	213.125	0	0	0	71923.1	0	N/A	-	-
SJALL005044_G1	FALSE	31.72	14.1527	Male	White	Acute lymphoblastic leukemia	none	FALSE	1430.52	8747.27	0	73.2035	0	0	16975.1	4042.97	37.5465	N/A	-	-
SJALL019049_G1	FALSE	26.61	3.23562	Female	White	Acute lymphoblastic leukemia	none	FALSE	0	0	0	25.4237	0	0	2684.75	7649.65	5.08475	N/A	-	-
SJHL019325_G1	FALSE	43.04	17.8841	Female	White	Hodgkin lymphoma	none	FALSE	1861.32	0	0	0	0	0	0	0	0	FALSE	-	-
SJHL018697_G1	FALSE	36.05	15.6995	Male	Black	Hodgkin lymphoma	none	FALSE	1269.58	0	0	312.5	0	0	2496.43	0	75	FALSE	-	-
SJRHB018846_G1	FALSE	36.65	14.3479	Female	Black	Rhabdomyosarcoma	none	FALSE	0	25200.7	0	0	0	16.568	0	0	34.3195	N/A	-	-
SJALL003454_G1	FALSE	22.02	1.74076	Male	White	Acute lymphoblastic leukemia	none	FALSE	0	14260	0	712.5	0	0	12827.8	22408.7	54.4534	N/A	-	-
SJHL019333_G1	FALSE	38.94	14.5671	Male	White	Hodgkin lymphoma	none	FALSE	1385	0	0	0	0	0	0	0	0	FALSE	-	-
SJALL004748_G1	FALSE	37.2	10.8719	Female	White	Acute lymphoblastic leukemia	none	FALSE	0	15304.1	0	975.339	0	0	11774.7	12588.9	21.1995	N/A	-	-
SJHL019319_G1	FALSE	43.26	17.0795	Female	White	Hodgkin lymphoma	none	FALSE	1020.82	6880.67	0	189.61	76.6234	0	0	0	74.2127	TRUE	-	-
SJALL041858_G1	FALSE	28.27	6.22192	Male	White	Acute lymphoblastic leukemia	none	FALSE	337.12	0	0	24.7059	0	0	1643.37	7664.29	5.88235	N/A	-	-
SJALL041423_G1	FALSE	29.88	10.7195	Female	Black	Acute lymphoblastic leukemia	none	TRUE	1267.22	6337.74	0	49.8366	0	0	14595	3052.91	39.1151	N/A	PAX5_L23fs	-
SJALL003624_G1	FALSE	27.42	9.99209	Male	White	Acute lymphoblastic leukemia	none	FALSE	0	9764.1	0	52.193	0	0	15996.6	21795.1	60.5263	N/A	-	-
SJOS019545_G1	FALSE	30.72	13.6274	Male	White	Osteosarcoma	none	FALSE	0	10223.9	2960.71	384	0	0	0	110720	0	N/A	-	-
SJALL042669_G1	FALSE	26.7	3.89071	Male	White	Acute lymphoblastic leukemia	none	FALSE	1233.66	0	0	48.5075	0	0	2356.52	3563.83	8.95522	N/A	-	-
SJWLM017961_G1	FALSE	23.21	4.25683	Male	White	Wilms tumor	none	FALSE	0	0	0	175.676	0	2.7027	0	0	18.9189	N/A	-	-
SJEWS019209_G1	FALSE	43.61	16.9394	Male	White	Ewing sarcoma family of tumors	none	FALSE	1668.96	13397.1	0	177.72	0	6.09137	2584.24	0	14.2132	N/A	-	-
SJNBL019423_G1	FALSE	23.73	0.101093	Male	White	Neuroblastoma	none	TRUE	0	5293.94	0	142.424	0	0	0	0	0	N/A	-	-
SJOS019534_G1	FALSE	32.31	5.92603	Male	White	Osteosarcoma	none	FALSE	0	6049.25	0	90.6667	0	0	0	36657.5	0	N/A	-	-
SJEWS018624_G1	FALSE	28.78	4.45628	Male	Black	Ewing sarcoma family of tumors	none	FALSE	913.8	14147.1	267.143	312.857	0	31.4286	617.143	0	58.5714	N/A	-	-
SJALL041385_G1	FALSE	27.01	4.83243	Male	White	Acute lymphoblastic leukemia	none	FALSE	0	9371.43	0	25.974	0	0	15400.8	4187.88	55.8442	N/A	BRCA1_S1655_E1661fs	BRCA1_S1655_E1661fs
SJHL019350_G1	FALSE	34.48	16.3342	Female	White	Hodgkin lymphoma	none	FALSE	1769.42	0	0	0	0	0	0	0	0	FALSE	-	-
SJALL019079_G1	FALSE	23.43	8.86027	Female	White	Acute lymphoblastic leukemia	none	FALSE	0	0	0	50.3704	0	0	1236.64	24940.8	41.4815	N/A	-	-
SJNBL018747_G1	FALSE	28.36	0.99726	Female	White	Neuroblastoma	none	FALSE	92.5	5311.54	460	180.769	0	0	512.727	0	0	N/A	-	-
SJCNS041483_G1	FALSE	24.79	3.46027	Female	White	Central nervous system (CNS)	none	FALSE	1247.12	26060	351.515	0	0	0	1175	0	33.8462	N/A	-	-
SJALL000013_G1	FALSE	31.65	9.76438	Male	White	Acute lymphoblastic leukemia	none	FALSE	252.54	0	0	24.8252	0	0	1390.44	10763.4	5.59441	N/A	-	-
SJAML018558_G1	FALSE	39.28	14.7041	Female	Black	Acute myeloid leukemia	autologous	FALSE	0	0	0	67.7	0	0	750	0	0	N/A	-	-
SJHL018684_G1	FALSE	35.38	11.0137	Female	Black	Hodgkin lymphoma	none	FALSE	1707.66	15117.2	0	159.603	88.0795	0	0	0	80.6211	TRUE	BRIP1_G657fs	BRCA2_K1323*
SJHL018676_G1	FALSE	41.01	14.1642	Male	White	Hodgkin lymphoma	none	FALSE	1828.02	0	0	0	0	0	0	0	0	FALSE	-	-
SJALL041404_G2	FALSE	29.57	3.04658	Male	White	Acute lymphoblastic leukemia	none	FALSE	0	0	0	25.3333	0	0	2686.25	8014.78	4	N/A	-	-
SJEWS018618_G1	FALSE	26.9	3.55068	Female	White	Ewing sarcoma family of tumors	none	FALSE	0	20824.7	0	315.789	0	12.2807	3000	0	26.3158	N/A	-	-
SJCNS041017_G1	FALSE	33.78	8.68052	Male	White	Central nervous system (CNS)	none	FALSE	2284.62	0	0	0	0	0	0	0	0	N/A	-	-
SJALL040943_G1	FALSE	26.87	2.90426	Male	White	Acute lymphoblastic leukemia	none	FALSE	0	0	0	25	0	0	2284.21	13985.2	5.17241	N/A	-	-
SJEWS018616_G1	FALSE	31.07	6.85121	Female	Other	Ewing sarcoma family of tumors	none	FALSE	371.46	21519.3	0	320.27	0	9.33333	3054.05	0	21.3333	N/A	-	-
SJWLM018913_G1	FALSE	31.46	12.0521	Male	White	Wilms tumor	none	FALSE	0	0	0	185.897	0	5.76923	0	0	19.2308	N/A	-	-
SJHL018688_G1	FALSE	24.18	5.77691	Male	White	Hodgkin lymphoma	none	FALSE	167.7	0	0	0	0	0	0	0	0	FALSE	-	-
SJHL019355_G1	FALSE	37.72	19.0451	Male	White	Hodgkin lymphoma	none	FALSE	1009	7263.54	0	148.333	0	0	0	119.444	42.1129	TRUE	-	-
SJCNS019188_G1	FALSE	25.92	1.86301	Female	White	Central nervous system (CNS)	none	FALSE	0	0		0	0	0		0		N/A	-	-
SJCNS019143_G1	FALSE	36.78	12.2959	Male	White	Central nervous system (CNS)	none	FALSE	2857.52	0	2267.46	0	0	0	1022.22	0	0	N/A	-	-
SJNBL019421_G1	FALSE	27.53	1.16712	Female	White	Neuroblastoma	none	FALSE	0	0	0	0	0	0	0	0	0	N/A	-	-
SJALL041362_G1	FALSE	31.36	8.18082	Male	White	Acute lymphoblastic leukemia	none	FALSE	0	0	0	25	0	0	600	4108	55.3398	N/A	-	-
SJALL004732_G1	FALSE	22.78	5.75342	Male	White	Acute lymphoblastic leukemia	none	FALSE	0	0	0	50.5682	0	0	1203.45	21705.8	56.8182	N/A	-	-
SJALL018494_G1	FALSE	27.22	2.04658	Female	White	Acute lymphoblastic leukemia	none	FALSE	0	0	0	25.4545	0	0	600	4138.18	56.3636	N/A	-	-
SJHL041562_G1	FALSE	38.35	18.1753	Male	White	Hodgkin lymphoma	none	FALSE	1058.42	7420.01	0	195.349	77.6744	0	0	0	56.0772	TRUE	-	-
SJEWS018615_G1	FALSE	38.3	12.9034	Male	White	Ewing sarcoma family of tumors	none	FALSE	446.04	21145.2	0	307.116	0	5.90406	3015.5	0	12.5461	N/A	-	-
SJALL042690_G1	FALSE	30.59	18.6027	Male	White	Acute lymphoblastic leukemia	none	FALSE	0	9996.08	0	53.5897	0	0	16611.2	23444.2	28.7179	N/A	-	-
SJHL018687_G1	FALSE	41.29	17.3929	Female	White	Hodgkin lymphoma	none	TRUE	2873.62	0	0	0	0	0	0	0	0	FALSE	-	-
SJCNS018578_G1	FALSE	32.66	12.0247	Female	White	Central nervous system (CNS)	none	FALSE	0	0	0	0	0	0	0	0	0	N/A	-	-
SJHL018678_G1	FALSE	35.84	10.506	Male	Black	Hodgkin lymphoma	none	FALSE	1707.66	7951.57	0	173.171	69.1057	0	0	0	66.8871	TRUE	-	-
SJCNS019135_G1	FALSE	31.73	6.36679	Male	White	Central nervous system (CNS)	none	FALSE	967.12	0	0	0	0	0	0	0	0	N/A	-	-
SJALL041461_G1	FALSE	28.3	12.0411	Male	White	Acute lymphoblastic leukemia	none	FALSE	0	5796.45	0	239.716	0	0	2792.03	18961	7.80142	N/A	-	-
SJCNS041479_G1	FALSE	31.24	8.70137	Female	Black	Central nervous system (CNS)	none	FALSE	1207.98	0	0	0	0	0	0	0	0	N/A	-	-
SJHL019329_G1	FALSE	40.44	15.0227	Female	White	Hodgkin lymphoma	none	FALSE	1752.82	0	0	0	0	0	0	0	0	FALSE	-	-
SJHL043129_G1	FALSE	38.2	17.3973	Male	White	Hodgkin lymphoma	none	TRUE	1976.44	7118.84	0	148.649	0	0	0	117.297	40.9948	TRUE	-	-
SJALL040945_G1	FALSE	30.48	6.11766	Female	Black	Acute lymphoblastic leukemia	none	FALSE	0	0	0	25.3012	0	0	1860.23	13113.2	6.0241	N/A	-	-
SJALL019092_G1	FALSE	25.28	11.9781	Female	Black	Acute lymphoblastic leukemia	none	TRUE	0	0	0	102.564	0	0	1233.33	9877.02	60.6838	N/A	-	-
SJALL041444_G1	FALSE	26.35	9.09057	Female	White	Acute lymphoblastic leukemia	none	FALSE	0	0	0	24.359	0	0	897.248	24052.4	25.641	N/A	-	-
SJNBL041605_G1	FALSE	24.87	0.769863	Male	Black	Neuroblastoma	none	FALSE	0	5402.17	0	182.609	0	0	0	0	0	N/A	-	-
SJCNS019763_G1	FALSE	24.68	10.3972	Female	White	Central nervous system (CNS)	none	FALSE	2857.52	16534.7	266.019	0	0	0	887.379	0	15.8416	N/A	-	-
SJWLM019684_G1	FALSE	25.21	3.51781	Female	Black	Wilms tumor	none	FALSE	173.54	0	0	180.952	0	3.1746	0	0	20.6349	N/A	-	-
SJCNS003708_G1	FALSE	27.05	10.3863	Female	Black	Central nervous system (CNS)	none	FALSE	735.14	0	0	0	0	0	0	0	0	N/A	-	-
SJCNS041490_G1	FALSE	23.18	7.23288	Female	White	Central nervous system (CNS)	none	FALSE	3272.46	15146.3	267.073	0	0	0	748.78	0	8.53659	N/A	-	-
SJNHL019491_G1	FALSE	35.32	14.4548	Male	White	Non-Hodgkin lymphoma	none	FALSE	0	5601.94	0	366.505	0	0	3017.96	123.786	19.4175	N/A	-	-
SJNHL019500_G1	FALSE	30.04	15.6548	Male	White	Non-Hodgkin lymphoma	none	TRUE	0	3412.84	2455.96	207.339	0	0	0	224.312	7.33945	N/A	-	-
SJEWS019210_G1	FALSE	42.12	20.6384	Female	White	Ewing sarcoma family of tumors	none	FALSE	336.92	21140.4	0	315.244	0	11.9048	3000	0	21.4286	N/A	-	-
SJALL041361_G1	FALSE	25.28	2.13119	Female	White	Acute lymphoblastic leukemia	none	FALSE	0	0	0	25	0	0	616.949	4133.33	55	N/A	-	-
SJRHB019591_G1	FALSE	34.8	12.2849	Male	Black	Rhabdomyosarcoma	none	TRUE	1097.14	0	0	0	0	8.77193	0	0	43.787	N/A	-	-
SJALL041433_G1	FALSE	21.7	3.82236	Female	Black	Acute lymphoblastic leukemia	none	FALSE	0	9600	0	58.3333	0	0	2492.96	20933.3	118.333	N/A	-	-
SJWLM018907_G1	FALSE	26.88	6.40548	Female	White	Wilms tumor	none	FALSE	407.78	0	0	166.667	0	3.0303	0	0	19.697	N/A	-	-
SJCNS019164_G1	FALSE	24.49	5.20945	Male	Black	Central nervous system (CNS)	none	FALSE	1124.62	0	0	0	0	0	0	0	0	N/A	-	-
SJWLM019689_G1	FALSE	26.03	3.46909	Male	Black	Wilms tumor	none	FALSE	634.36	0	0	177.632	0	2.63158	0	0	19.7368	N/A	-	-
SJALL041387_G1	FALSE	27.03	3.88525	Male	White	Acute lymphoblastic leukemia	none	FALSE	337.12	8187.34	0	25	0	0	12815.2	5238.11	51.3158	N/A	-	FANCC_N152_E5splice_region
SJHL018681_G1	FALSE	40.54	15.5863	Male	White	Hodgkin lymphoma	none	TRUE	1020.82	9002.45	0	196	78.2857	0	0	0	68.5714	TRUE	-	-
SJHL018700_G1	FALSE	39.01	17.9726	Female	White	Hodgkin lymphoma	none	FALSE	1009	0	0	200	0	0	0	160.123	44.7853	FALSE	-	-
SJALL003607_G1	FALSE	29.55	14.0855	Female	White	Acute lymphoblastic leukemia	none	FALSE	0	7047.21	0	50	0	0	11675.8	22110.6	32.4873	N/A	-	-
SJEWS041983_G1	FALSE	38.24	16.937	Female	White	Ewing sarcoma family of tumors	none	FALSE	446.04	21183.6	0	314.935	0	7.79221	3000	0	25.3247	N/A	-	-
SJHL019334_G1	FALSE	31.21	7.13973	Male	White	Hodgkin lymphoma	none	FALSE	1552.56	9511.9	0	200	79.7619	0	0	0	71.4286	TRUE	-	-
SJHL019345_G1	FALSE	38.07	16.9689	Female	White	Hodgkin lymphoma	none	TRUE	1881.74	0	0	301.84	0	0	2419.63	0	72.3926	FALSE	-	-
SJWLM018901_G1	FALSE	29.51	3.81694	Female	Black	Wilms tumor	none	FALSE	407.78	0	0	180	0	7.69231	0	0	38.4615	N/A	-	-
SJEWS019216_G1	FALSE	33.6	14.9478	Male	White	Ewing sarcoma family of tumors	none	FALSE	1272.1	25774.8	0	316.667	0	2.87081	4335.85	0	19.8113	N/A	-	-
SJRHB019592_G1	FALSE	26.23	2.64384	Female	Black	Rhabdomyosarcoma	none	FALSE	598.52	0	0	0	0	8.47458	0	0	72.8814	N/A	-	-
SJCNS042706_G1	FALSE	27.75	6.03644	Female	White	Central nervous system (CNS)	none	FALSE	2753.16	0	0	0	0	0	0	0	0	N/A	-	-
SJHL018713_G1	FALSE	32.79	14.4027	Female	White	Hodgkin lymphoma	none	FALSE	1009	0	0	198.969	0	0	0	158.763	45.8763	FALSE	-	-
SJHL019354_G1	FALSE	37.88	18.8888	Female	White	Hodgkin lymphoma	none	FALSE	1075.6	6923.19	0	145.902	0	0	0	116.94	40.4372	TRUE	-	-
SJNBL019427_G1	FALSE	24.3	2.50411	Male	White	Neuroblastoma	none	TRUE	0	14797.6	2094.24	181.667	0	0	5459.91	0	0	N/A	-	-
SJALL004735_G1	FALSE	21.81	6.72003	Female	White	Acute lymphoblastic leukemia	none	FALSE	0	0	0	52.1978	0	0	906.452	25807.3	54.9451	N/A	-	-
SJALL003856_G2	FALSE	28.24	2.92603	Male	White	Acute lymphoblastic leukemia	none	FALSE	0	0	0	25	0	0	2288.89	12544.6	5.35714	N/A	-	-
SJALL042466_G1	FALSE	17.48	2.10079	Male	White	Acute lymphoblastic leukemia	none	FALSE	1616.76	7514.75	0	50.8065	0	0	12888.5	4154.84	59.6774	N/A	-	-
SJNBL019426_G1	FALSE	25.24	0.553425	Female	White	Neuroblastoma	none	FALSE	0	0	0	0	0	0	0	0	0	N/A	-	-
SJRHB019597_G1	FALSE	25.22	4.83562	Female	White	Rhabdomyosarcoma	none	FALSE	407.12	27310.6	0	0	0	8.57143	2472.22	0	45.8333	N/A	-	-
SJWLM019696_G1	FALSE	22.63	3.07547	Male	Black	Wilms tumor	none	FALSE	0	0	0	0	0	2.77778	0	0	9.72222	N/A	-	-
SJRHB019598_G1	FALSE	26.48	9.15616	Female	White	Rhabdomyosarcoma	none	FALSE	658.94	21630.1	0	0	0	14.5631	0	0	42.7184	N/A	-	-
SJCNS019180_G1	FALSE	37.46	19.8301	Female	White	Central nervous system (CNS)	none	TRUE	3569.82	11983.7	266.667	0	0	0	893.333	0	9.30233	N/A	-	-
SJNHL042743_G1	FALSE	33.91	13.6301	Female	White	Non-Hodgkin lymphoma	none	FALSE	0	3034.55	0	24.8663	0	0	4304.28	6505.51	17.1123	N/A	-	-
SJALL040969_G1	FALSE	33.63	14.1151	Female	White	Acute lymphoblastic leukemia	none	FALSE	0	0	0	52.0408	0	0	1237.24	24127.6	48.9796	N/A	-	-
SJRHB060_G	FALSE	27.54	12.6356	Male	Black	Rhabdomyosarcoma	none	FALSE	0	22517.9	0	0	0	13.5135	0	0	38.7387	N/A	-	-
SJCNS041484_G1	FALSE	29.79	8.09315	Male	Black	Central nervous system (CNS)	none	FALSE	709.74	0	0	0	0	0	0	0	0	N/A	-	-
SJWLM019675_G1	FALSE	30.62	4.21644	Female	Black	Wilms tumor	none	FALSE	0	0	0	0	0	5.6338	0	0	19.7183	N/A	-	-
SJALL041364_G1	FALSE	40.5	16.9507	Female	White	Acute lymphoblastic leukemia	none	FALSE	207.54	8607.98	0	24.5665	0	0	11976.5	4097.11	38.1503	N/A	-	-
SJNBL017917_G1	FALSE	24.83	0.835616	Female	White	Neuroblastoma	none	FALSE	0	5036.96	0	139.535	0	0	0	0	0	N/A	-	-
SJCNS042705_G1	FALSE	27.63	4.91658	Male	White	Central nervous system (CNS)	none	FALSE	0	0	0	0	0	0	0	0	0	N/A	-	-
SJALL041399_G1	FALSE	22.51	1.77534	Male	White	Acute lymphoblastic leukemia	none	FALSE	516.02	2313.85	0	50	0	0	0	2895.23	43.1034	N/A	-	-
SJNHL042749_G1	FALSE	24.24	5.68775	Female	White	Non-Hodgkin lymphoma	none	FALSE	0		0	0	0	0	0	0	0	N/A	-	-
SJCNS041922_G1	FALSE	28.6	9.32544	Male	White	Central nervous system (CNS)	none	FALSE	0	0	0	0	0	0	0	0	0	N/A	-	-
SJRHB042497_G1	FALSE	31.3	3.24384	Female	White	Rhabdomyosarcoma	none	FALSE	839.4	0	0	295.238	0	9.67742	0	0	71.4286	N/A	-	-
SJRHB018845_G1	FALSE	31.86	9.42121	Male	White	Rhabdomyosarcoma	none	FALSE	824.04	14394.7	0	356.818	0	7.31707	0	0	27.2727	N/A	-	-
SJCNS018588_G1	FALSE	24.83	6.88506	Male	Black	Central nervous system (CNS)	none	TRUE	1002.12	0	2944.33	0	0	0	0	0	0	N/A	-	-
SJALL017888_G1	FALSE	34.12	8.62466	Female	White	Acute lymphoblastic leukemia	none	FALSE	0	10496.9	0	25.2632	0	0	18039.1	5532.73	60.6383	N/A	-	-
SJALL019058_G1	FALSE	25.9	3.79781	Female	White	Acute lymphoblastic leukemia	none	FALSE	0	8997.78	0	52.2222	0	0	13968.1	23228.1	72.2222	N/A	-	-
SJEWS041503_G1	FALSE	24.71	5.16248	Male	White	Ewing sarcoma family of tumors	none	FALSE	1209.32	22028.3	0	324.675	0	7.89474	3164.38	0	26.3158	N/A	-	-
SJNBL019424_G1	FALSE	23.85	0.585598	Female	White	Neuroblastoma	none	FALSE	0	7867.39	181.132	263.043	0	0	200	0	0	N/A	-	-
SJWLM019680_G1	FALSE	29.23	5.14873	Female	White	Wilms tumor	none	FALSE	634.36	0	0	223.611	0	8.33333	0	0	37.5	N/A	-	-
SJCNS019161_G1	FALSE	31.56	11.6164	Male	White	Central nervous system (CNS)	none	FALSE	2857.52	0	0	0	0	0	0	0	0	N/A	-	-
SJLGG011283_G1	FALSE	30.59	9.9951	Male	White	Central nervous system (CNS)	none	FALSE	303.34	0	0	0	0	0	0	0	0	N/A	NF1_T990_M991fs	-
SJAML018555_G1	FALSE	43.54	18.9012	Male	Other	Acute myeloid leukemia	none	FALSE	0	0	0	100.318	0	0	11128.3	38.7097	0	N/A	-	-
SJHL040963_G1	FALSE	37.92	17.7205	Male	White	Hodgkin lymphoma	none	FALSE	1009	6794.17	0	146.429	0	0	0	116.327	40.8163	TRUE	-	-
SJHL019337_G1	FALSE	36.51	15.3004	Female	White	Hodgkin lymphoma	none	FALSE	1033.7	0	0	308.333	0	0	2469.05	0	72.0238	FALSE	-	-
SJHL019327_G1	FALSE	41.44	17.6885	Female	Black	Hodgkin lymphoma	none	FALSE	1020.82	8738.67	0	170.748	68.0272	0	0	0	65.483	TRUE	-	-
SJAML017892_G1	FALSE	40.59	15.6257	Female	Black	Acute myeloid leukemia	none	FALSE	0	0	0	98.8235	0	0	8992.94	35.2941	0	N/A	-	-
SJALL041374_G1	FALSE	33.09	10.9665	Female	Other	Acute lymphoblastic leukemia	none	FALSE	252.54	9223.97	0	25.9259	0	0	15052.8	4205.56	54.6296	N/A	-	-
SJALL042680_G1	FALSE	24.91	6.82466	Female	White	Acute lymphoblastic leukemia	none	FALSE	0	8971.77	0	51.6129	0	0	13890.6	22532.3	58.871	N/A	-	-
SJRHB041686_G1	FALSE	34.68	16.5233	Male	White	Rhabdomyosarcoma	none	FALSE	355.28	15434.4	0	368.421	0	5.55556	0	0	25	N/A	-	-
SJHL019363_G1	FALSE	30.52	14.5726	Female	White	Hodgkin lymphoma	none	FALSE	1309.42	6641.84	0	152.381	0	0	0	122.024	43.4524	TRUE	-	-
SJNHL018787_G1	FALSE	29.39	3.05191	Female	White	Non-Hodgkin lymphoma	none	FALSE	0	6944.44	0	384.242	0	0	3607.14	377.778	34.5455	N/A	-	-
SJALL041436_G1	FALSE	26.5	8.58056	Male	White	Acute lymphoblastic leukemia	none	FALSE	0	9545.45	0	52.5362	0	0	16278.6	21650	52.1739	N/A	-	-
SJOS018818_G1	FALSE	34.92	15.7288	Male	White	Osteosarcoma	none	FALSE	0	0	0	0	0	0	0	0	0	N/A	-	-
SJALL019072_G1	FALSE	29.24	10.537	Female	White	Acute lymphoblastic leukemia	none	TRUE	0	9909	0	51.8519	0	0	13673.8	23086.2	58.3333	N/A	-	-
SJEWS043122_G1	FALSE	27.48	1.66974	Female	White	Ewing sarcoma family of tumors	none	TRUE	236.76	21183.6	0	315.385	0	7.69231	3038.46	0	23.0769	N/A	-	-
SJRHB019593_G1	FALSE	35.32	13.1342	Male	Black	Rhabdomyosarcoma	none	FALSE	615.28	11740	0	190	0	12	0	0	19.4118	N/A	-	-
SJNHL018785_G1	FALSE	37.01	11.874	Male	White	Non-Hodgkin lymphoma	none	FALSE	673.44	2272.52	0	120.611	0	0	0	625	9.92366	N/A	-	-
SJCNS018598_G1	FALSE	34.14	17.0447	Male	White	Central nervous system (CNS)	autologous	FALSE	2315.02	0	0	0	0	0	0	0	8.7	N/A	-	ERCC2_R616P
SJALL019045_G1	FALSE	33.68	6.69589	Female	White	Acute lymphoblastic leukemia	none	FALSE	0	0	0	0	0	0	0	6363.41	28.0488	N/A	-	-
SJOS041642_G1	FALSE	24.71	11.0756	Female	Black	Osteosarcoma	none	FALSE	0	9571.38	2779.34	224.074	0	0	0	94940.1	0	N/A	-	-
SJE2A040_G	FALSE	28.18	7.6411	Male	White	Acute lymphoblastic leukemia	none	FALSE	0	0	0	25.6098	0	0	2312.5	8715.87	6.09756	N/A	-	-
SJHL040962_G1	FALSE	29.81	9.53151	Male	Black	Hodgkin lymphoma	none	TRUE	1637.06	6785.97	0	155.238	0	0	0	123.81	45.1786	TRUE	-	-
SJOS019548_G1	FALSE	28.02	10.8247	Female	White	Osteosarcoma	none	TRUE	1409.34	9747.97	2807.01	431.507	0	0	0	108111	0	N/A	-	-
SJOS042514_G1	FALSE	40.52	12.2959	Female	White	Osteosarcoma	none	FALSE	0	9748.33	400	354.601	0	0	0	111824	0	N/A	-	-
SJOS018811_G1	FALSE	35.16	10.0548	Female	White	Osteosarcoma	none	TRUE	0	7817.26	200	343.75	0	0	0	84000	0	N/A	-	-
SJHL018698_G1	FALSE	38.34	18.1467	Female	White	Hodgkin lymphoma	none	FALSE	1849.02	0	0	0	0	0	0	0	0	FALSE	-	-
SJALL041431_G2	FALSE	28.28	4.21096	Female	White	Acute lymphoblastic leukemia	none	TRUE	0	0	0	25	0	0	1655.42	11280.1	5.81395	N/A	-	-
SJALL041389_G1	FALSE	25.4	4.87558	Female	White	Acute lymphoblastic leukemia	none	FALSE	337.12	6629.33	0	25	0	0	12483.2	4236.84	55.2632	N/A	-	-
SJWLM043895_G1	FALSE	31.16	4.70391	Female	White	Wilms tumor	none	FALSE	0	0	0	183.562	0	2.73973	0	0	20.5479	N/A	-	-
SJAML018557_G1	FALSE	34.74	14.5602	Male	White	Acute myeloid leukemia	none	FALSE	0	0	0	152.045	0	0	800	5.5814	0	N/A	-	-
SJALL041450_G1	FALSE	27.19	9.78904	Female	White	Acute lymphoblastic leukemia	none	FALSE	0	8766.97	0	51.8182	0	0	13786.5	37064.9	57.2727	N/A	-	-
SJALL041428_G1	FALSE	22.54	3.43101	Female	White	Acute lymphoblastic leukemia	none	FALSE	0	0	0	24.5763	0	0	1622.95	11025	5.08475	N/A	-	-
SJALL041049_G1	FALSE	28.36	2.11785	Female	White	Acute lymphoblastic leukemia	none	FALSE	516.02	0	0	25	0	0	3750	9371.57	5.76923	N/A	-	-
SJNHL042739_G1	FALSE	25.26	3.51233	Male	White	Non-Hodgkin lymphoma	none	FALSE	0	6737.14	0	194.286	0	0	0	4295.71	11.4286	N/A	-	-
SJHL019336_G1	FALSE	39.84	17.9781	Female	White	Hodgkin lymphoma	none	TRUE	1751.12	0	0	306.875	0	0	2452.5	0	73.75	FALSE	-	-
SJOS042854_G1	FALSE	40.8	16.9644	Male	White	Osteosarcoma	none	FALSE	0	8338.05	2222.6	74.6667	0	0	0	12000	0	N/A	-	-
SJHL018693_G1	FALSE	42.11	18.5571	Male	White	Hodgkin lymphoma	none	FALSE	991.8	0	0	316.425	0	0	2532.37	0	71.0145	FALSE	-	-
SJNHL018790_G1	FALSE	31.51	10.6849	Male	White	Non-Hodgkin lymphoma	none	FALSE	0	11465.7	3290.72	204.04	0	0	0	273.976	13.1313	N/A	-	-
SJNHL019481_G1	FALSE	34.93	7.58356	Male	Black	Non-Hodgkin lymphoma	none	FALSE	0	5664.71	0	461.765	0	0	5267	212.5	32.3529	N/A	-	-
SJCNS018589_G1	FALSE	31.67	12.4712	Female	Black	Central nervous system (CNS)	none	FALSE	760.54	0	0	0	0	0	0	0	0	N/A	-	-
SJHL041569_G1	FALSE	26.3	9.39109	Male	Black	Hodgkin lymphoma	none	FALSE	1061.18	6525.37	0	124.561	0	0	0	139.474	43.7235	TRUE	-	-
SJNHL041627_G1	FALSE	30.76	10.411	Male	White	Non-Hodgkin lymphoma	none	FALSE	1569.92	6332.17	0	352.174	0	0	3917.27	143.478	31.3043	N/A	-	-
SJE2A037_G	FALSE	24.8	8.53425	Male	Black	Acute lymphoblastic leukemia	none	FALSE	0	9233.86	0	55.3279	0	0	17722.1	21177.9	56.5574	N/A	-	-
SJCNS019766_G1	FALSE	25.96	11.5574	Female	White	Central nervous system (CNS)	none	TRUE	0	0	0	0	0	0	0	0	0	N/A	-	-
SJRHB041684_G1	FALSE	23.93	2.26301	Male	Black	Rhabdomyosarcoma	none	FALSE	607.74	15961.3	0	389.474	0	7.01754	0	0	38.5965	N/A	-	-
SJCNS019165_G1	FALSE	26.89	7.18082	Male	Black	Central nervous system (CNS)	none	FALSE	0	0	0	0	0	0	0	0	0	N/A	NF1_T1435fs	ERCC4_W193*
SJHL019339_G1	FALSE	30.74	8.63431	Male	White	Hodgkin lymphoma	none	FALSE	123.24	0	0	206.612	0	0	0	165.289	49.5868	FALSE	-	-
SJHL018699_G1	FALSE	41.41	19.5054	Female	White	Hodgkin lymphoma	none	FALSE	1009	0	0	205.229	0	0	0	163.399	49.0196	FALSE	-	-
SJAML042702_G1	FALSE	31.47	10.9294	Male	White	Acute myeloid leukemia	none	FALSE	0	10263.3	0	76.1261	0	0	11980.1	8360.96	55	N/A	-	-
SJNHL019482_G1	FALSE	28.32	3.44423	Male	White	Non-Hodgkin lymphoma	none	FALSE	0	6951.43	0	194.286	0	0	0	4125.57	8.57143	N/A	-	-
SJHL018691_G1	FALSE	37.53	14.2071	Male	White	Hodgkin lymphoma	none	FALSE	1009	0	0	300	0	0	2400	0	71.9388	FALSE	-	-
SJALL018505_G1	FALSE	27.34	5.64581	Male	White	Acute lymphoblastic leukemia	none	FALSE	0	0	0	12.3457	0	0	597.368	16839.7	4.93827	N/A	-	-
SJALL018501_G1	FALSE	28.99	5.05817	Male	White	Acute lymphoblastic leukemia	none	FALSE	1233.66	0	0	62.3377	0	0	3407.69	3155.84	11.6883	N/A	-	-
SJRHB019595_G1	FALSE	25.12	5.16331	Male	White	Rhabdomyosarcoma	none	FALSE	0	0	0	0	0	17.3913	0	0	36.2637	N/A	-	-
SJCNS041917_G1	FALSE	25.06	7.24313	Female	White	Central nervous system (CNS)	none	FALSE	0	0	0	0	0	0	0	0	0	N/A	-	-
SJRHB018847_G1	FALSE	26.82	7.74795	Female	White	Rhabdomyosarcoma	none	FALSE	248.78	13308.1	645.918	183.505	0	3.125	1331.63	36122.4	20.7386	N/A	-	-
SJWLM018904_G1	FALSE	26.81	5.25205	Female	White	Wilms tumor	none	FALSE	0	0	0	154.412	0	2.94118	0	0	20.5882	N/A	-	-
SJHL019321_G1	FALSE	36.88	12.9671	Male	White	Hodgkin lymphoma	none	FALSE	1068.92	8244.28	0	195.973	59.0604	0	0	0	72.1454	TRUE	-	-
SJALL040950_G1	FALSE	39.96	17.1876	Male	Black	Acute lymphoblastic leukemia	none	TRUE	0	9330.53	0	51.8325	0	0	15655.1	23612.1	37.6963	N/A	-	-
SJCNS019760_G1	FALSE	28.92	9.11233	Female	White	Central nervous system (CNS)	none	FALSE	0	0	0	0	0	0	0	0	0	N/A	NF1_R1362*	-
SJHL019324_G1	FALSE	42.17	17.0845	Female	White	Hodgkin lymphoma	none	TRUE	1740.64	7200.25	0	95.5128	28.2051	0	0	0	39.0005	TRUE	-	-
SJHL019358_G1	FALSE	28.91	13.5425	Male	Black	Hodgkin lymphoma	none	FALSE	190.9	0	0	209.489	0	0	0	167.883	50.365	FALSE	-	-
SJOS019540_G1	FALSE	41.21	19.9452	Male	White	Osteosarcoma	none	FALSE	0	9777.96	400	391.96	0	0	0	109620	0	N/A	-	-
SJHL019361_G1	FALSE	32.35	17.3243	Male	White	Hodgkin lymphoma	none	FALSE	1680.54	6988.34	0	154.45	0	0	0	123.56	43.2952	TRUE	-	-
SJHL017904_G1	FALSE	28.48	11.611	Male	White	Hodgkin lymphoma	none	FALSE	819.44	6682.65	0	150	0	0	0	120.536	44.6429	TRUE	-	-
SJHL019328_G1	FALSE	43.18	18.4583	Female	White	Hodgkin lymphoma	none	FALSE	1058.42	6848.87	0	147.368	39.4737	0	0	0	52.6316	TRUE	-	-
SJRHB018843_G1	FALSE	28.82	1.63836	Male	White	Rhabdomyosarcoma	none	FALSE	634.74	14783.8	0	366	0	8	0	0	36	N/A	-	ERCC6_Q723*
SJALL042692_G1	FALSE	24.11	11.6959	Male	White	Acute lymphoblastic leukemia	none	FALSE	0	0	0	50	0	0	1197.9	23992.4	53.7313	N/A	-	-
SJNBL019419_G1	FALSE	27.88	1.99452	Male	Black	Neuroblastoma	none	FALSE	0	7995.56	478.261	147.826	0	0	1972.34	0	0	N/A	-	-
SJCNS019156_G1	FALSE	31.23	9.18329	Male	White	Central nervous system (CNS)	none	FALSE	2902.82	0	0	0	0	0	0	0	0	N/A	-	-
SJALL040947_G1	FALSE	33.11	10.0786	Female	White	Acute lymphoblastic leukemia	none	FALSE	0	7800	0	50	0	0	13500	20335.5	26.6129	N/A	-	-
SJALL005325_G1	FALSE	35.47	16.2795	Male	White	Acute lymphoblastic leukemia	none	FALSE	0	8443.42	0	49.3589	0	0	14513.2	22253.3	49.2335	N/A	TP53_R248W	-
SJALL018542_G1	FALSE	26.52	8.7529	Male	White	Acute lymphoblastic leukemia	none	FALSE	0	0	0	63.3929	0	0	1258.33	25414.5	58.0357	N/A	-	-
SJHL019331_G1	FALSE	37.24	13.8384	Female	White	Hodgkin lymphoma	none	FALSE	2051.64	4897.96	0	102.837	41.1348	0	0	0	30.2649	TRUE	-	-
SJOS018821_G1	FALSE	26.11	9.16712	Female	White	Osteosarcoma	none	FALSE	0	9623.05	2274.42	383.908	0	0	0	109302	0	N/A	-	-
SJOS019537_G1	FALSE	39.22	14.8961	Male	Black	Osteosarcoma	none	TRUE	0	7731.27	100	387.179	0	0	0	60298.1	0	N/A	-	-
SJALL040940_G1	FALSE	27.37	2.26027	Female	White	Acute lymphoblastic leukemia	none	FALSE	516.02	0	0	0	0	0	0	6201.37	55	N/A	-	-
SJCNS003252_G1	FALSE	26.65	4.77869	Male	White	Central nervous system (CNS)	none	FALSE	0	0	0	0	0	0	0	0	0	N/A	-	-
SJNBL041606_G1	FALSE	24.88	1.4986	Male	White	Neuroblastoma	none	FALSE	0	0	0	0	0	0	0	0	0	N/A	-	-
SJNHL042858_G1	FALSE	35.41	16.1995	Male	White	Non-Hodgkin lymphoma	none	TRUE	389.34	10928.8	0	122.667	0	0	3527.71	47454.8	9.33333	N/A	-	-
SJCNS019152_G1	FALSE	22.95	4.45479	Male	White	Central nervous system (CNS)	none	FALSE	2788.16	0	0	0	0	0	0	0	0	N/A	-	-
SJCNS041492_G1	FALSE	21.47	5.89863	Female	Black	Central nervous system (CNS)	none	FALSE	0	0	0	0	0	0	0	0	0	N/A	-	-
SJNBL019425_G1	FALSE	23.06	0.00821918	Female	White	Neuroblastoma	none	FALSE	0	5814.29	0	110.345	0	0	0	0	0	N/A	-	-
SJALL041435_G1	FALSE	24.21	5.22989	Male	White	Acute lymphoblastic leukemia	none	FALSE	0	8832.91	0	50.6098	0	0	14423.5	20384.2	54.878	N/A	-	-
SJALL019041_G1	FALSE	35.02	7.45205	Female	White	Acute lymphoblastic leukemia	none	FALSE	0	7364.96	0	78.7734	0	0	13845.9	21186.2	107.253	N/A	-	-
SJALL041452_G1	FALSE	21.05	4.73425	Female	White	Acute lymphoblastic leukemia	none	FALSE	0	6348.61	0	50	0	0	11056.3	23149.4	59.4595	N/A	-	-
SJHL018715_G1	FALSE	32.42	15.0727	Male	White	Hodgkin lymphoma	none	TRUE	595.4	0	0	202.871	0	0	0	161.244	48.8038	FALSE	-	-
SJRHB042765_G1	FALSE	27.94	13.1836	Female	White	Rhabdomyosarcoma	none	FALSE	0	25104.7	0	0	0	6.94444	3775.71	0	35.7143	N/A	-	-
SJCNS003712_G1	FALSE	25.26	2.05753	Male	Black	Central nervous system (CNS)	none	FALSE	1918.52	21246.4	11058.9	0	0	0	3550	0	0	N/A	-	-
SJNHL018792_G1	FALSE	35.91	15.6493	Female	White	Non-Hodgkin lymphoma	none	FALSE	0	3326.92	3987.92	199.038	0	0	0	183.256	7.69231	N/A	-	-
SJOS019538_G1	FALSE	36.42	13.6219	Male	White	Osteosarcoma	none	FALSE	0	4200	400	379.747	105.063	4.43038	0	120000	0	N/A	-	-
SJOS019535_G1	FALSE	34.35	7.56282	Male	White	Osteosarcoma	none	FALSE	0	9755.93	400	382.796	0	0	0	108132	0	N/A	-	-
SJHL018689_G1	FALSE	38.4	16.4027	Male	Black	Hodgkin lymphoma	none	FALSE	1469.34	11721.2	0	252.727	0	0	2020.61	0	72.0336	TRUE	-	-
SJHL041567_G1	FALSE	34.57	16.4521	Female	White	Hodgkin lymphoma	none	FALSE	1976.44	0	0	201.575	0	0	2179.53	0	47.2441	FALSE	-	-
SJOS018820_G1	FALSE	34.65	16.1205	Female	Black	Osteosarcoma	none	FALSE	0	9706.37	2798.57	291.489	0	0	0	111053	0	N/A	-	-
SJHL019332_G1	FALSE	27.06	4.81366	Male	White	Hodgkin lymphoma	none	FALSE	139.8	4800	0	70	40	0	0	0	22.4762	TRUE	-	-
SJCNS001218_G1	FALSE	34.34	16.0519	Male	White	Central nervous system (CNS)	none	FALSE	0	0	0	0	0	0	0	0	0	N/A	-	-
SJOS018813_G1	FALSE	36.49	13.7671	Female	White	Osteosarcoma	none	FALSE	0	9581.8	401.258	388.75	0	0	0	107375	0	N/A	-	-
SJAML001422_G2	FALSE	36.36	17.2493	Male	White	Acute myeloid leukemia	autologous	TRUE	0	0	0	73.85	0	0	588.3	18.3	0	N/A	-	-
SJAML019107_G1	FALSE	42.24	16.4959	Female	White	Acute myeloid leukemia	none	FALSE	0	3553.69	0	263.051	0	0	5283.66	78.4314	20.979	N/A	MSH6_W414*	MSH6_W414*
SJCNS019136_G1	FALSE	28.92	2.50871	Male	White	Central nervous system (CNS)	none	FALSE	0	0	0	0	0	0	0	0	0	N/A	-	-
SJALL042676_G1	FALSE	23.99	4.1589	Male	White	Acute lymphoblastic leukemia	none	FALSE	0	0	0	24.6753	0	0	1755.41	15500	6.49351	N/A	-	-
SJNBL018751_G1	FALSE	25.28	2.07123	Female	Black	Neuroblastoma	none	FALSE	0	7139.62	975	180	0	0	4310	0	0	N/A	-	-
SJHL018722_G1	FALSE	35.3	18.5644	Female	White	Hodgkin lymphoma	none	TRUE	1565.04	6724.86	0	149.711	39.3064	0	0	0	41.6185	TRUE	-	-
SJNHL019486_G1	FALSE	32.68	10.1178	Male	White	Non-Hodgkin lymphoma	autologous	TRUE	1200	2230.6	0	318.5	31.8	0	0	1364.8	9.3	N/A	-	-
SJALL041432_G1	FALSE	23.12	4.62466	Female	White	Acute lymphoblastic leukemia	none	FALSE	0	0	0	25.6944	0	0	1410	17300.5	5.55556	N/A	-	-
SJWLM019850_G1	FALSE	23.66	0.613594	Female	Black	Wilms tumor	none	FALSE	310.18	0	0	192.308	0	10.2564	0	0	46.1538	N/A	-	-
SJCNS019154_G1	FALSE	27.61	7.17453	Female	White	Central nervous system (CNS)	none	FALSE	0	0	0	0	0	0	0	0	0	N/A	-	-
SJALL041384_G1	FALSE	24.5	1.90091	Male	White	Acute lymphoblastic leukemia	none	TRUE	516.02	9932.14	0	25	0	0	15425	4164.29	58.9286	N/A	-	-
SJALL018506_G1	FALSE	23.88	2.17462	Male	White	Acute lymphoblastic leukemia	none	FALSE	0	8203.28	0	50.4098	0	0	11157.7	35404.6	58.224	N/A	-	-
SJOS018823_G1	FALSE	20.53	7.97541	Male	White	Osteosarcoma	none	FALSE	0	9855.63	2842.06	368.182	0	0	0	95412.8	0	N/A	-	-
SJCNS018581_G1	FALSE	24.37	3.46371	Female	White	Central nervous system (CNS)	none	FALSE	1247.12	0	0	0	0	0	0	0	0	N/A	-	-
SJWLM018905_G1	FALSE	24.91	2.09589	Male	White	Wilms tumor	none	FALSE	0	0	0	0	0	1.88679	0	0	9.43396	N/A	-	-
SJALL018495_G1	FALSE	35.13	8.73973	Female	White	Acute lymphoblastic leukemia	none	FALSE	252.54	9462.07	0	24.2424	0	0	13831.4	4581.32	48.4848	N/A	-	-
SJCNS019163_G1	FALSE	23.86	5.74795	Male	White	Central nervous system (CNS)	none	FALSE	2753.16	15714.3	267.949	0	0	0	892.308	0	10.3896	N/A	-	-
SJALL041373_G1	FALSE	38.72	15.9753	Male	Black	Acute lymphoblastic leukemia	none	FALSE	207.54	9229.68	0	24.6711	0	0	14799.7	4118.42	43.4211	N/A	-	-
SJALL041393_G2	FALSE	33.16	6.02059	Male	White	Acute lymphoblastic leukemia	none	FALSE	0	0	0	25	0	0	600	4100	57.9545	N/A	-	-
SJWLM043128_G1	FALSE	27.72	3.15957	Female	White	Wilms tumor	none	FALSE	173.54	0	0	175.758	0	3.0303	0	0	19.697	N/A	-	-
SJCNS041496_G1	FALSE	21.23	7.11107	Female	White	Central nervous system (CNS)	none	FALSE	967.12	0	0	0	0	0	0	0	0	N/A	-	-
SJNBL018748_G1	FALSE	27.44	0.860274	Female	White	Neuroblastoma	none	TRUE	0	0	0	0	0	0	0	0	0	N/A	-	-
SJWLM019683_G1	FALSE	26.82	2.86575	Female	White	Wilms tumor	none	FALSE	0	0	0	0	0	1.92308	0	0	13.4615	N/A	-	-
SJALL018504_G1	FALSE	22.16	1.62899	Male	White	Acute lymphoblastic leukemia	none	FALSE	0	0	0	25	0	0	2302	15695.8	6.25	N/A	-	-
SJEWS019213_G1	FALSE	27.24	7.27945	Male	White	Ewing sarcoma family of tumors	none	FALSE	0	25372.7	0	356.522	0	4.2735	4146.09	0	33.0435	N/A	-	-
SJCNS019765_G1	FALSE	22.88	8.70026	Male	White	Central nervous system (CNS)	none	FALSE	2956.72	9027.52	564.22	0	0	0	0	0	38.7931	N/A	-	-
SJNHL019490_G1	FALSE	24.65	2.12877	Female	White	Non-Hodgkin lymphoma	none	TRUE	0	7266.67	0	350	0	0	4136.36	318.519	14.8148	N/A	-	-
SJALL019044_G1	FALSE	36.9	10.58	Female	White	Acute lymphoblastic leukemia	none	FALSE	252.54	25705.1	0	1080.56	0	0	24112.8	10745.2	80.1327	N/A	-	ERCC3_F270*
SJALL042546_G1	FALSE	33.52	6.30555	Female	White	Acute lymphoblastic leukemia	none	TRUE	337.12	9868.67	0	37.6623	0	0	15502.8	4202.6	59.7403	N/A	-	FANCD2_K905_E28splice
SJWLM019676_G2	FALSE	29.85	2.30954	Male	Black	Wilms tumor	none	FALSE	0	0	0	0	0	4.7619	0	0	17.4603	N/A	-	-
SJHL018710_G1	FALSE	32.39	13.3233	Male	White	Hodgkin lymphoma	none	TRUE	1009	6974.56	0	148.936	0	0	0	119.149	44.3894	TRUE	-	-
SJALL042685_G1	FALSE	23.38	4.39071	Male	White	Acute lymphoblastic leukemia	none	FALSE	0	5140	0	293	0	0	3150	23265.3	22.3333	N/A	-	BLM_Q700*
SJALL042672_G1	FALSE	24.82	2.30685	Female	White	Acute lymphoblastic leukemia	none	FALSE	681.02	0	0	25	0	0	2810.71	8187.5	5.35714	N/A	-	-
SJCNS041487_G1	FALSE	30.31	12.2049	Female	White	Central nervous system (CNS)	none	FALSE	23.94	0	0	0	0	0	0	0	0	N/A	-	-
SJCNS041485_G1	FALSE	34.32	14.4219	Male	White	Central nervous system (CNS)	none	FALSE	3269.82	0	0	0	0	0	0	0	0	N/A	PALB2_L253fs	PALB2_L253fs
SJCNS019178_G1	FALSE	27.65	10.0247	Female	White	Central nervous system (CNS)	none	FALSE	0	0	0	0	0	0	0	0	0	N/A	-	-
SJALL019053_G1	FALSE	25.2	1.46027	Male	White	Acute lymphoblastic leukemia	none	FALSE	0	0	0	25	0	0	3898.08	19364.1	5.76923	N/A	-	-
SJCNS019142_G1	FALSE	34.59	10.7288	Female	Black	Central nervous system (CNS)	none	FALSE	912.78	0	0	0	0	0	0	0	0	N/A	-	-
SJHL019344_G1	FALSE	36.17	15.6466	Male	White	Hodgkin lymphoma	none	FALSE	1009	4288.53	0	153.266	0	0	0	122.613	41.5897	TRUE	-	-
SJHL019793_G1	FALSE	27.76	13.2384	Female	White	Hodgkin lymphoma	none	FALSE	1009	7065.65	0	151.095	0	0	0	120.438	45.007	TRUE	-	-
SJALL019042_G1	FALSE	30.76	5.74247	Female	Black	Acute lymphoblastic leukemia	none	FALSE	337.12	10004.8	0	25	0	0	15520.4	4210	57.5	N/A	-	-
SJCNS019168_G1	FALSE	31.59	12.4274	Female	White	Central nervous system (CNS)	none	FALSE	2882.92	0	0	0	0	0	0	0	0	N/A	-	-
SJNBL019418_G1	FALSE	26.71	0.635616	Female	White	Neuroblastoma	none	FALSE	0	7397.5	180.952	252.5	0	0	200	0	0	N/A	TP53_R175H	-
SJALL018497_G1	FALSE	29.31	4.54521	Male	White	Acute lymphoblastic leukemia	none	FALSE	0	9672.62	0	25	0	0	15515.4	4135	55	N/A	-	-
SJALL041439_G1	FALSE	22.24	4.58539	Female	White	Acute lymphoblastic leukemia	none	TRUE	0	8897.5	0	38.961	0	0	15435.9	20649.6	58.4416	N/A	-	-
SJHL019359_G1	FALSE	32.73	14.4431	Female	White	Hodgkin lymphoma	none	FALSE	1009	0	0	204.118	0	0	0	162.941	48.2353	FALSE	-	-
SJNHL041625_G1	FALSE	36.71	14.9753	Female	White	Non-Hodgkin lymphoma	none	TRUE	0	2272	0	121.143	0	0	0	615.084	8	N/A	-	-
SJAML019110_G1	FALSE	24.27	1.72329	Male	White	Acute myeloid leukemia	none	TRUE	0	0	0	112.069	0	0	8867.24	86.2069	1.72414	N/A	-	-
SJALL010138_G1	FALSE	27.14	1.85255	Male	White	Acute lymphoblastic leukemia	none	TRUE	1341.76	5327.5	0	411.667	0	0	5743.77	20457.6	27.6667	N/A	-	-
SJALL042686_G2	FALSE	29.15	10.0443	Male	White	Acute lymphoblastic leukemia	none	FALSE	0	0	0	52.2222	0	0	1188	27597.6	61.1111	N/A	-	-
SJAML019109_G1	FALSE	42.06	18.5918	Female	Black	Acute myeloid leukemia	none	TRUE	0	0	0	0	0	0	2010.34	0	0	N/A	-	-
SJHL043452_G1	FALSE	38.43	17.2959	Female	Black	Hodgkin lymphoma	none	FALSE	1009	7008.47	0	148.276	0	0	0	118.621	44.1379	TRUE	-	-
SJRHB018844_G1	FALSE	31.45	5.27608	Male	White	Rhabdomyosarcoma	none	FALSE	0	0	0	0	0	11.3924	0	0	71.6049	N/A	-	-
SJLGG001217_G1	FALSE	26.58	11.9481	Male	White	Central nervous system (CNS)	none	FALSE	0	0	0	0	0	0	0	0	0	N/A	-	-
SJRHB019590_G1	FALSE	26.84	1.72561	Male	White	Rhabdomyosarcoma	none	FALSE	252.92	0	0	156.667	0	5	0	0	60	N/A	-	-
SJCNS019757_G1	FALSE	23.31	2.32329	Male	Black	Central nervous system (CNS)	none	FALSE	0	0	0	0	0	0	0	0	0	N/A	-	-
SJALL042667_G1	FALSE	28.73	3.90959	Female	White	Acute lymphoblastic leukemia	none	FALSE	0	10052.4	0	24.6914	0	0	16351.2	5388.1	55.5556	N/A	-	-
SJALL040974_G1	FALSE	35.73	16.8751	Male	White	Acute lymphoblastic leukemia	none	FALSE	0	8758.23	0	51.6327	0	0	15559.9	23981.8	29.3878	N/A	-	-
SJNBL041047_G1	FALSE	23.23	0.194124	Male	Black	Neuroblastoma	none	FALSE	0	0	0	0	0	0	0	0	0	N/A	-	-
SJCNS018592_G1	FALSE	25.91	7.24414	Female	White	Central nervous system (CNS)	none	FALSE	0	0	0	0	0	0	0	0	0	N/A	-	-
SJHL018717_G1	FALSE	31.09	13.8202	Female	White	Hodgkin lymphoma	none	FALSE	1009	0	0	201.504	0	0	0	161.654	48.1203	FALSE	-	-
SJNHL018795_G1	FALSE	30.96	13.4812	Male	White	Non-Hodgkin lymphoma	none	FALSE	0	3385.81	3300.65	201.935	0	0	0	233.933	10.3226	N/A	-	-
SJHL018694_G1	FALSE	29.94	8.23288	Male	Black	Hodgkin lymphoma	autologous	FALSE	2810.92	12171.8	0	300	0	0	2808.9	8152.4	85.3	TRUE	-	-
SJALL004032_G1	FALSE	34.06	13.1376	Male	Black	Acute lymphoblastic leukemia	none	FALSE	255.96	23703.2	0	758.025	0	0	23250.9	27574.7	85.6757	N/A	-	-
SJHL041578_G1	FALSE	31.72	17.8658	Female	White	Hodgkin lymphoma	none	FALSE	754.36	6506.05	0	151.515	0	0	0	121.212	43.4225	TRUE	-	-
SJALL041394_G1	FALSE	25.23	4.5192	Female	White	Acute lymphoblastic leukemia	none	FALSE	337.12	9984.38	0	25.3623	0	0	15174.9	4243.48	53.6232	N/A	-	-
SJCNS018571_G1	FALSE	28.59	4.06027	Male	White	Central nervous system (CNS)	none	TRUE	2264.66	0	0	0	0	0	0	0	0	N/A	-	-
SJALL042687_G1	FALSE	24.73	12.2814	Female	Black	Acute lymphoblastic leukemia	none	FALSE	0	9319.3	0	51.2931	0	0	14994	22705.2	56.0345	N/A	-	-
SJALL042688_G1	FALSE	25.35	10.3479	Male	Black	Acute lymphoblastic leukemia	none	FALSE	252.54	10547.3	0	37.5	0	0	16698.2	22043.6	56.6667	N/A	-	-
SJALL040966_G1	FALSE	27.97	8.12055	Female	White	Acute lymphoblastic leukemia	none	FALSE	0	0	0	53.4884	0	0	1297.59	22569	63.9535	N/A	-	-
SJEWS019212_G1	FALSE	38.84	18.5534	Male	White	Ewing sarcoma family of tumors	none	FALSE	0	26297.4	0	369.11	0	3.19149	4293.19	0	25.1309	N/A	-	-
SJALL021900_G1	FALSE	34.09	14.6096	Female	White	Acute lymphoblastic leukemia	none	FALSE	0	7317.74	0	50.4065	0	0	13561.6	22290.9	53.6585	N/A	-	-
SJCNS019133_G1	FALSE	39.81	12.6712	Male	White	Central nervous system (CNS)	none	FALSE	550.94	6313.74	0	0	0	0	0	0	0	N/A	-	-
SJALL042691_G1	FALSE	32.05	17.9096	Female	Black	Acute lymphoblastic leukemia	none	FALSE	0	9847.89	0	52.1622	0	0	15965.4	23687.8	29.7297	N/A	-	-
SJCNS019162_G1	FALSE	25.38	5.32384	Male	Black	Central nervous system (CNS)	none	FALSE	2753.16	0	0	0	0	0	0	0	0	N/A	-	-
SJALL019055_G1	FALSE	26.67	5.46301	Female	White	Acute lymphoblastic leukemia	none	FALSE	0	6966	0	188	0	0	0	3952	12	N/A	-	-
SJALL041886_G1	FALSE	26.78	3.13282	Male	White	Acute lymphoblastic leukemia	none	FALSE	0	0	0	0	0	0	0	12022.7	6.15385	N/A	-	-
SJCNS018572_G1	FALSE	35.41	11.611	Male	White	Central nervous system (CNS)	none	FALSE	2882.92	0	0	0	0	0	0	0	0	N/A	-	-
SJOS018817_G1	FALSE	33.57	13.4733	Female	White	Osteosarcoma	none	FALSE	0	9522.48	2754.14	431.579	0	0	0	106316	0	N/A	-	-
SJOS019536_G1	FALSE	36.17	11.2047	Male	Black	Osteosarcoma	none	FALSE	0	10674.3	400	382.051	0	0	0	107544	0	N/A	-	-
SJALL041405_G1	FALSE	31.94	11.0548	Male	Black	Acute lymphoblastic leukemia	none	FALSE	0	0	0	25.1799	0	0	3162.32	10467.8	5.7554	N/A	-	-
SJALL003098_G1	FALSE	29.69	9.49281	Female	Black	Acute lymphoblastic leukemia	none	FALSE	252.54	0	0	24.5536	0	0	2388.03	7921.01	6.25	N/A	-	-
SJCNS019132_G1	FALSE	30.34	4.59452	Male	White	Central nervous system (CNS)	none	FALSE	2904.96	0	0	0	0	0	0	0	0	N/A	-	-
SJCNS019764_G1	FALSE	28.03	13.4982	Male	White	Central nervous system (CNS)	none	FALSE	591.34	0	0	0	0	0	0	0	0	N/A	-	-
SJNHL042746_G1	FALSE	32.75	12.7178	Male	White	Non-Hodgkin lymphoma	none	TRUE	0	2244.44	0	119.841	0	0	0	652.713	8.73016	N/A	-	-
SJALL018517_G1	FALSE	25.9	6.59726	Female	Black	Acute lymphoblastic leukemia	none	FALSE	0	8720.18	0	52.7778	0	0	14347.8	23763.8	56.4815	N/A	-	-
SJNHL042742_G1	FALSE	30.12	9.21644	Male	White	Non-Hodgkin lymphoma	none	FALSE	0	7335	0	203.333	0	0	0	4306.44	10.8333	N/A	-	-
SJALL018528_G1	FALSE	25.27	5.9936	Female	White	Acute lymphoblastic leukemia	none	FALSE	0	0	0	53.4247	0	0	1226.58	25206.4	67.1233	N/A	-	-
SJWLM042137_G1	FALSE	25.3	2.47945	Female	Black	Wilms tumor	none	FALSE	1103.66	2933.39	0	192.453	0	7.54717	600	0	35.8491	N/A	-	-
SJNHL042740_G1	FALSE	26.07	4.46027	Male	White	Non-Hodgkin lymphoma	none	FALSE	0	7153.25	0	200	0	0	0	4168.31	11.6883	N/A	-	-
SJLGG001211_G1	FALSE	21.19	2.82145	Male	White	Central nervous system (CNS)	none	FALSE	1506.02	0	3578.57	0	0	0	0	0	0	N/A	-	-
SJEWS018619_G1	FALSE	37.32	15.0932	Female	White	Ewing sarcoma family of tumors	none	FALSE	197.14	13660	0	175.429	0	4.44444	2409.5	0	13.3333	N/A	-	-
SJHL041573_G1	FALSE	26.04	11.537	Female	White	Hodgkin lymphoma	none	FALSE	819.44	0	0	200	0	0	0	160.221	48.0663	FALSE	-	-
SJHL018712_G1	FALSE	31.74	13.7123	Female	White	Hodgkin lymphoma	none	FALSE	1027.18	6796.97	0	152.448	0	0	0	121.678	44.3107	TRUE	-	-
SJCNS018575_G1	FALSE	31.99	9.1863	Male	White	Central nervous system (CNS)	none	FALSE	2857.52	0	0	0	0	0	0	0	0	N/A	-	-
SJALL041377_G1	FALSE	25.43	3.30317	Female	White	Acute lymphoblastic leukemia	none	FALSE	0	0	0	24.0741	0	0	648	7800	51.8519	N/A	-	-
SJALL041443_G1	FALSE	26.54	8.36612	Male	White	Acute lymphoblastic leukemia	none	FALSE	252.54	9131.31	0	52	0	0	14577.3	22678	58	N/A	-	-
SJNHL041633_G1	FALSE	29.43	14.6099	Female	White	Non-Hodgkin lymphoma	none	FALSE	0	3450.67	3384.38	206	0	0	0	230.093	10.6667	N/A	-	-
SJHL019341_G1	FALSE	34.63	13.6329	Male	White	Hodgkin lymphoma	none	FALSE	1009	0	0	207.317	0	0	0	165.041	47.1545	FALSE	-	-
SJALL041383_G2	FALSE	40.55	12.6572	Female	White	Acute lymphoblastic leukemia	none	FALSE	207.54	7292.16	0	24.1176	0	0	11655.9	4073.02	33.5404	N/A	-	-
SJNHL019479_G1	FALSE	35.48	8.2274	Male	White	Non-Hodgkin lymphoma	none	TRUE	0	12634.6	0	348.598	0	0	0	6245.94	15.9584	N/A	-	-
SJWLM041715_G1	FALSE	30.72	10.6082	Male	White	Wilms tumor	none	FALSE	745.66	0	0	192.857	0	9.52381	0	0	41.2698	N/A	-	-
SJEWS019208_G1	FALSE	35.44	8.45753	Female	White	Ewing sarcoma family of tumors	none	FALSE	1186.34	11663	0	384.783	0	7.36842	0	0	15.7895	N/A	-	-
SJCNS018602_G1	FALSE	28.36	12.8124	Male	Black	Central nervous system (CNS)	autologous	FALSE	2315.02	15084.6	302.3	0	0	0	0	0	10.8	N/A	-	-
SJALL040949_G1	FALSE	37.74	14.9606	Female	White	Acute lymphoblastic leukemia	none	FALSE	268.14	8317.61	0	49.6599	0	0	9363.89	18761.7	48.9796	N/A	-	-
SJCNS019166_G1	FALSE	28.53	3.57377	Female	White	Central nervous system (CNS)	none	FALSE	0	0	0	0	0	0	0	0	0	N/A	NF1_E1926*	-
SJHL041560_G1	FALSE	34.99	13.0895	Female	White	Hodgkin lymphoma	none	FALSE	1890.32	0	0	0	0	0	0	0	0	FALSE	-	-
SJALL041395_G2	FALSE	40.5	13.4122	Male	White	Acute lymphoblastic leukemia	none	FALSE	268.14	9261.04	0	23.5669	0	0	13334.3	4159.57	42.0382	N/A	-	-
SJNHL019495_G1	FALSE	31.83	12.1507	Male	White	Non-Hodgkin lymphoma	none	FALSE	0	8563.04	0	51.1494	0	0	15534.5	24945.2	40.2299	N/A	-	-
SJNHL019810_G1	FALSE	33.9	13.7096	Male	White	Non-Hodgkin lymphoma	autologous	TRUE	1201.2	1600.5	915.5	150.3	0	0	0	15.4	5.1	N/A	-	-
SJWLM018899_G1	FALSE	30.8	5.05753	Female	White	Wilms tumor	none	FALSE	647.96	0	0	175	0	8.82353	0	0	41.1765	N/A	-	-
SJHL042721_G1	FALSE	28.13	5.85753	Male	White	Hodgkin lymphoma	none	FALSE	0	7799.26	0	107.5	60	0	0	0	39.0909	TRUE	-	-
SJALL041375_G1	FALSE	25.27	3.10586	Female	White	Acute lymphoblastic leukemia	none	FALSE	337.12	8485.71	0	25	0	0	13435.7	4906.28	45.4545	N/A	-	-
SJHL019340_G1	FALSE	39.51	17.8962	Female	White	Hodgkin lymphoma	none	TRUE	1075.6	0	0	198.701	0	0	0	159.74	48.0519	FALSE	-	-
SJRHB017946_G1	FALSE	28.9	5.39858	Male	White	Rhabdomyosarcoma	none	FALSE	0	0	0	0	0	12.2222	0	0	72.7273	N/A	-	-
SJHL042526_G1	FALSE	31.1	8.66393	Male	White	Hodgkin lymphoma	none	FALSE	485.04	0	0	207	0	0	0	167	50	FALSE	-	-
SJAML007134_G1	FALSE	33.37	13.2738	Male	White	Acute myeloid leukemia	autologous	FALSE	0	0	0	92.55	0	0	808.5	17	0	N/A	-	-
SJCNS018585_G1	FALSE	19.98	5.47813	Male	White	Central nervous system (CNS)	none	FALSE	967.12	0	0	0	0	0	0	0	0	N/A	-	-
SJCNS018587_G1	FALSE	25.26	5.84023	Female	White	Central nervous system (CNS)	none	FALSE	0	0	0	0	0	0	0	0	0	N/A	NF1_E196_E5splice	-
SJALL041424_G2	FALSE	34.88	10.6704	Female	White	Acute lymphoblastic leukemia	none	FALSE	0	0	0	23.3645	0	0	779.439	1931.77	5.60748	N/A	-	-
SJNHL040952_G1	FALSE	39.02	17.1591	Male	White	Non-Hodgkin lymphoma	none	FALSE	0	3320.61	2567.44	165.649	0	0	0	123.864	6.10687	N/A	-	-
SJALL041857_G1	FALSE	34.61	13.9751	Male	White	Acute lymphoblastic leukemia	none	FALSE	207.54	0	0	25.1479	0	0	2116.23	8430.09	3.5503	N/A	-	-
SJEWS018614_G1	FALSE	43.67	16.6438	Female	White	Ewing sarcoma family of tumors	none	FALSE	2851.42	19485.6	0	331.613	0	10.8434	1800	0	18.6747	N/A	-	-
SJHL019349_G1	FALSE	36.82	17.4219	Male	White	Hodgkin lymphoma	none	FALSE	1009	6646.41	0	147.264	0	0	0	117.91	41.177	TRUE	-	-
SJOS019546_G1	FALSE	29.66	10.1671	Male	White	Osteosarcoma	none	FALSE	0	9808.91	2787.23	368.041	0	0	0	111630	0	N/A	-	-
SJALL005048_G1	FALSE	31.13	11.8798	Male	White	Acute lymphoblastic leukemia	none	FALSE	252.54	10205.6	0	50.3906	0	0	16494.1	22075	50.7812	N/A	-	-
SJRHB003950_G2	FALSE	29.4	7.75342	Male	White	Rhabdomyosarcoma	none	FALSE	0	28811.3	0	0	0	20.6897	0	0	58.6207	N/A	-	-
SJALL040942_G1	FALSE	26.52	2.40659	Male	White	Acute lymphoblastic leukemia	none	TRUE	0	0	0	25.7576	0	0	2091.04	11613.6	6.06061	N/A	-	-
SJNHL042750_G1	FALSE	25.27	7.72055	Female	White	Non-Hodgkin lymphoma	none	FALSE	0	5263.04	0	98.913	0	0	0	3149.86	8.69565	N/A	-	-
SJHL018718_G1	FALSE	35.66	17.8939	Male	White	Hodgkin lymphoma	none	FALSE	1565.04	5632.08	0	152.475	49.505	0	0	0	35.3633	TRUE	-	-
SJCNS019153_G1	FALSE	26.7	4.68219	Female	White	Central nervous system (CNS)	none	FALSE	0	0	0	0	0	0	0	0	0	N/A	-	-
SJALL041397_G1	FALSE	25.5	3.77315	Female	White	Acute lymphoblastic leukemia	none	FALSE	0	0	0	25.4098	0	0	3753.12	13549.4	6.55738	N/A	-	-
SJALL041369_G2	FALSE	35.33	6.75782	Female	White	Acute lymphoblastic leukemia	none	TRUE	337.12	2241.38	0	50	0	0	0	1895.69	50	N/A	-	-
SJALL041044_G1	FALSE	30.31	3.01308	Male	White	Acute lymphoblastic leukemia	none	FALSE	337.12	10096.4	0	25.4545	0	0	15515.7	4450.91	51.7857	N/A	-	-
SJCNS018582_G1	FALSE	31.4	10.5753	Male	White	Central nervous system (CNS)	none	FALSE	2857.52	0	2952.94	0	0	0	844.118	0	0	N/A	-	-
SJHL042723_G1	FALSE	34.33	17.7973	Male	White	Hodgkin lymphoma	none	FALSE	595.4	0	0	206.806	0	0	0	165.445	49.7382	FALSE	PMS2_R421*	PMS2_R421*
SJWLM019702_G1	FALSE	26.52	9.1726	Female	White	Wilms tumor	none	FALSE	471.18	4508.15	1377.89	198.99	0	7.07071	922.105	0	24.2424	N/A	-	-
SJCNS001207_G1	FALSE	24.86	3.46175	Female	White	Central nervous system (CNS)	none	FALSE	0	0	0	0	0	0	0	0	0	N/A	-	-
SJWLM019688_G1	FALSE	22.88	2.38082	Male	White	Wilms tumor	none	FALSE	0	0	0	182.143	0	1.78571	0	0	19.6429	N/A	-	-
SJHL041574_G1	FALSE	34.75	19.7233	Male	Black	Hodgkin lymphoma	none	FALSE	1236.4	7379.53	0	123.834	40.4145	0	0	0	37.3205	TRUE	-	-
SJCNS019181_G1	FALSE	32.32	14.8459	Male	White	Central nervous system (CNS)	none	FALSE	571.14	0	0	0	0	0	0	0	0	N/A	-	-
SJALL042477_G1	FALSE	28.3	16.7034	Female	White	Acute lymphoblastic leukemia	none	FALSE	0	0	0	45.5128	0	0	1188.89	20189.4	44.2308	N/A	-	-
SJCNS019155_G1	FALSE	36.97	15.8495	Male	Black	Central nervous system (CNS)	none	FALSE	0	0	0	0	0	0	0	0	0	N/A	-	-
SJHL018695_G1	FALSE	40.03	17.5507	Female	White	Hodgkin lymphoma	none	FALSE	1009	0	0	206.623	0	0	0	150.993	49.0066	FALSE	-	-
SJCNS019140_G1	FALSE	29.98	4.90557	Male	White	Central nervous system (CNS)	none	FALSE	1177.12	12447.8	304.478	0	0	0	0	0	0	N/A	-	-
SJAML007029_G1	FALSE	28.94	10.8055	Female	White	Acute myeloid leukemia	autologous	FALSE	0	0	0	45.1	0	0	400	28.8	0	N/A	-	-
SJEWS001301_G2	FALSE	33.37	13.6849	Male	White	Ewing sarcoma family of tumors	none	FALSE	290.14	24626.4	0	376.224	0	2.91971	4311.19	0	18.1818	N/A	-	-
SJALL018500_G1	FALSE	29.3	5.58904	Male	White	Acute lymphoblastic leukemia	none	FALSE	337.12	6169.6	0	26.7606	0	0	11183.2	5361.38	56.338	N/A	-	-
SJRHB042763_G1	FALSE	27.56	8.58197	Male	White	Rhabdomyosarcoma	none	FALSE	1498.54	27381.6	0	0	0	14.2857	0	0	56.1224	N/A	-	-
SJNHL018786_G1	FALSE	28.18	2.3396	Male	White	Non-Hodgkin lymphoma	none	TRUE	0	6801.64	0	190.164	0	0	0	4108.97	11.4754	N/A	-	-
SJHL041568_G2	FALSE	39.21	17.0965	Female	White	Hodgkin lymphoma	none	FALSE	1193.92	0	0	307.027	0	0	2458.38	0	65.9459	FALSE	-	-
SJWLM041718_G1	FALSE	23.39	3.75342	Female	Black	Wilms tumor	none	FALSE	407.78	0	0	145.946	0	2.7027	0	0	18.9189	N/A	-	-
SJALL018524_G1	FALSE	28.01	8.18082	Male	White	Acute lymphoblastic leukemia	none	TRUE	0	9252	0	53.6842	0	0	15671.7	22575.9	63.1579	N/A	-	-
SJALL041455_G1	FALSE	26.65	10.0169	Female	White	Acute lymphoblastic leukemia	none	FALSE	252.54	6757.43	0	51.4706	0	0	13617	23605.4	54.902	N/A	-	-
SJALL041398_G1	FALSE	30.5	9.11011	Male	Black	Acute lymphoblastic leukemia	none	FALSE	0	0	0	24.2424	0	0	3214.14	12178.1	6.06061	N/A	-	-
SJWLM018900_G1	FALSE	30.21	4.38299	Male	Black	Wilms tumor	none	FALSE	0	0	0	0	0	5.33333	0	0	18.6667	N/A	-	-
SJHL019342_G1	FALSE	38.65	17.7479	Female	Black	Hodgkin lymphoma	none	FALSE	1193.92	8190.19	0	202.424	0	0	1621.82	0	57.9523	TRUE	-	-
SJHL018696_G1	FALSE	35.27	12.8575	Male	White	Hodgkin lymphoma	none	FALSE	1732.94	0	0	306.04	0	0	2448.32	0	65.7718	FALSE	-	-
SJHL019360_G1	FALSE	34.13	15.623	Male	White	Hodgkin lymphoma	none	FALSE	1565.04	7070	0	152	0	0	0	121.714	42.6667	TRUE	-	-
SJHL018702_G1	FALSE	34.9	15.4767	Female	White	Hodgkin lymphoma	none	TRUE	2280.22	8640.36	0	214.729	0	0	1716.28	0	62.3516	TRUE	-	-
SJCNS001214_G1	FALSE	33.45	14.6071	Male	White	Central nervous system (CNS)	none	FALSE	0	0	0	0	0	0	0	0	0	N/A	-	-
SJALL018545_G1	FALSE	31.52	14.584	Male	Black	Acute lymphoblastic leukemia	none	FALSE	0	10302.9	0	52.3392	0	0	15961.7	24112.9	37.4269	N/A	-	-
SJALL018493_G1	FALSE	28.27	2.90541	Male	White	Acute lymphoblastic leukemia	none	FALSE	0	0	0	25.4237	0	0	633.333	4262.71	55.9322	N/A	-	-
SJCNS019160_G1	FALSE	29.82	9.51507	Female	White	Central nervous system (CNS)	none	FALSE	0	0	0	0	0	0	0	0	0	N/A	-	-
SJCNS018574_G1	FALSE	38.45	15.3973	Female	White	Central nervous system (CNS)	none	FALSE	3354.92	16078.7	264.567	0	0	0	883.465	0	11.0236	N/A	-	-
SJWLM019690_G1	FALSE	29.65	8.05205	Male	White	Wilms tumor	none	FALSE	471.18	0	0	179	0	3	0	0	20	N/A	-	-
SJALL018496_G1	FALSE	28.31	1.84658	Female	White	Acute lymphoblastic leukemia	none	FALSE	516.02	9888.68	0	25	0	0	15549.8	4200	55.7692	N/A	-	-
SJCNS019175_G1	FALSE	26.61	3.2274	Male	White	Central nervous system (CNS)	none	FALSE	0	0	0	0	0	0	0	0	0	N/A	-	-
SJALL041368_G1	FALSE	25.23	2.05205	Male	White	Acute lymphoblastic leukemia	none	FALSE	0	0	0	25.4386	0	0	600	4133.33	54.386	N/A	-	-
SJALL041046_G1	FALSE	28.3	1.10098	Male	White	Acute lymphoblastic leukemia	none	FALSE	516.02	9464.71	0	25	0	0	16436.1	4194.87	56.25	N/A	-	-
SJALL041409_G1	FALSE	23.11	2.20822	Male	White	Acute lymphoblastic leukemia	none	FALSE	0	0	0	25	0	0	2684.21	7702.71	5.35714	N/A	-	-
SJNBL041048_G1	FALSE	26.77	0.0300546	Female	White	Neuroblastoma	none	FALSE	0	5709.29	0	200	0	0	0	0	0	N/A	-	-
SJCNS042862_G1	FALSE	32.82	11.2301	Male	White	Central nervous system (CNS)	none	FALSE	0	0	10855.3	0	0	0	0	0	52.9412	N/A	-	-
SJNHL042748_G1	FALSE	23.84	5.04387	Female	White	Non-Hodgkin lymphoma	none	FALSE	0	2304.82	0	122.892	0	0	0	38.5542	9.63855	N/A	-	-
SJALL041426_G1	FALSE	22.24	2.57534	Female	White	Acute lymphoblastic leukemia	none	FALSE	0	0	0	25.8929	0	0	1662.07	8439.29	5.35714	N/A	-	-
SJALL041282_G1	FALSE	29.68	6.33325	Female	White	Acute lymphoblastic leukemia	none	FALSE	0	0	0	49.6914	0	0	1207.14	24481.4	59.7002	N/A	-	-
SJWLM017955_G1	FALSE	29.39	5.83008	Female	White	Wilms tumor	none	FALSE	0	0	0	176.19	0	8.33333	0	0	40.4762	N/A	-	-
SJALL041411_G2	FALSE	29.65	3.19452	Female	White	Acute lymphoblastic leukemia	none	FALSE	0	0	0	25	0	0	2488.14	13166.2	6.89655	N/A	-	-
SJNHL018793_G1	FALSE	28.76	8.86849	Female	Black	Non-Hodgkin lymphoma	none	FALSE	0	8435.85	0	54.8913	0	0	13453.3	25064.5	66.3043	N/A	-	-
SJALL041458_G1	FALSE	26.31	10.6877	Male	White	Acute lymphoblastic leukemia	none	FALSE	0	9661.16	0	50.813	0	0	16033	24147.7	57.7236	N/A	-	-
SJCNS019169_G1	FALSE	30.82	11.7452	Female	White	Central nervous system (CNS)	none	FALSE	2882.92	0	0	0	0	0	0	0	0	N/A	-	-
SJRHB041687_G1	FALSE	28.01	11.2137	Male	White	Rhabdomyosarcoma	none	FALSE	1052.54	25029.5	0	0	0	15.6522	0	34900	51.3043	N/A	-	-
SJCNS041486_G1	FALSE	29.47	9.8411	Male	White	Central nervous system (CNS)	none	FALSE	3867.72	0	2738.4	0	0	0	782.4	0	0	N/A	-	-
SJHL018679_G1	FALSE	32.06	6.76887	Female	White	Hodgkin lymphoma	none	FALSE	1070.16	7493.62	0	218.367	78.5714	0	0	0	66.0877	TRUE	-	-
SJHL041564_G1	FALSE	37.21	16.9288	Male	White	Hodgkin lymphoma	none	TRUE	595.4	0	0	199.432	0	0	0	159.091	47.7273	FALSE	-	-
SJCNS041906_G1	FALSE	24.24	3.61096	Male	White	Central nervous system (CNS)	none	TRUE	2753.16	19239.5	7486.99	0	0	0	2239.39	0	27.9412	N/A	-	-
SJHL019326_G1	FALSE	29.6	5.07781	Male	White	Hodgkin lymphoma	none	FALSE	0	6294	0	151.429	60	0	0	0	44.4099	TRUE	-	-
SJNHL019811_G1	FALSE	22.46	4.20234	Female	White	Non-Hodgkin lymphoma	none	FALSE	0	4300	0	100	0	0	0	1800	4.28571	N/A	-	-
SJALL019054_G1	FALSE	37.83	13.7748	Male	White	Acute lymphoblastic leukemia	none	FALSE	0	7398.39	0	200.787	0	0	0	4066.9	11.811	N/A	-	-
SJHL041050_G1	FALSE	38.88	13.4661	Male	White	Hodgkin lymphoma	none	FALSE	1740.64	8498.29	0	147.134	58.5987	0	0	0	59.6985	TRUE	-	-
SJNHL042064_G1	FALSE	30.15	6.22257	Female	White	Non-Hodgkin lymphoma	none	FALSE	0	4109.86	0	333.803	0	0	3553.33	270.423	32.3944	N/A	-	-
SJHL042722_G1	FALSE	32.81	13.5281	Male	Black	Hodgkin lymphoma	none	FALSE	1236.4	0	0	210.191	0	0	0	168.153	50.3185	FALSE	-	-
SJNHL019497_G1	FALSE	26.95	9.68767	Female	White	Non-Hodgkin lymphoma	none	TRUE	0	9238.26	0	51.3393	0	0	15885.7	29197.2	58.9286	N/A	-	-
SJCNS019147_G1	FALSE	32.01	7.48767	Female	White	Central nervous system (CNS)	none	FALSE	3436.06	0	0	0	0	0	0	0	0	N/A	-	-
SJWLM017956_G1	FALSE	24.18	5.55616	Female	White	Wilms tumor	none	FALSE	0	0	0	180.282	0	2.8169	0	0	19.7183	N/A	-	-
SJNBL043459_G1	FALSE	28.36	2.90685	Female	White	Neuroblastoma	none	TRUE	432.24	7501.89	818.868	183.019	0	0	4239.62	0	0	N/A	-	-
SJALL042678_G1	FALSE	31.06	11.9016	Male	White	Acute lymphoblastic leukemia	none	FALSE	252.54	3205.83	0	50	0	0	6588.79	15766	22.1374	N/A	-	-
SJHL018690_G1	FALSE	37.93	14.6986	Female	White	Hodgkin lymphoma	none	FALSE	1009	0	0	300	0	0	2395.09	0	71.7791	FALSE	-	-
SJHL019330_G1	FALSE	34.3	10.7129	Male	Black	Hodgkin lymphoma	none	TRUE	819.44	3690.28	0	68.595	39.6694	0	0	0	20.7306	TRUE	-	-
SJALL041441_G1	FALSE	25.86	8.59583	Female	White	Acute lymphoblastic leukemia	none	FALSE	0	9061.05	0	53.2258	0	0	14993.5	25042.2	62.3656	N/A	-	-
SJALL019089_G1	FALSE	27.52	14.1549	Female	Black	Acute lymphoblastic leukemia	none	FALSE	0	9030.77	0	49.2481	0	0	14284.4	6221.35	51.1278	N/A	-	-
SJWLM019674_G1	FALSE	25.86	1.59452	Male	White	Wilms tumor	none	TRUE	0	0	0	151.724	0	8.62069	0	0	39.6552	N/A	-	-
SJOS019543_G1	FALSE	31.29	11.4877	Female	White	Osteosarcoma	none	FALSE	0	3911.18	1676.67	290.833	0	0	0	104083	0	N/A	-	-
SJRHB003947_G2	FALSE	31.18	5.26027	Female	White	Rhabdomyosarcoma	none	FALSE	1787.26	8715.93	0	211.538	0	1.31579	0	0	29.4872	N/A	-	-
SJNHL018788_G1	FALSE	30.49	5.46906	Male	White	Non-Hodgkin lymphoma	none	FALSE	0	2282.61	0	121.739	0	0	0	0	8.69565	N/A	-	-
SJALL041379_G1	FALSE	32.26	10.211	Male	White	Acute lymphoblastic leukemia	none	FALSE	252.54	10602.3	0	25.1825	0	0	17420.6	4149.97	51.0949	N/A	-	-
SJALL042697_G1	FALSE	29.91	9.52877	Male	White	Acute lymphoblastic leukemia	none	FALSE	252.54	0	0	298.333	0	0	0	570	58.3333	N/A	-	-
SJWLM019681_G1	FALSE	24.81	1.90959	Female	Black	Wilms tumor	none	FALSE	132.52	0	0	225.862	0	6.89655	0	0	36.2069	N/A	-	-
SJHL018711_G1	FALSE	31.96	13.2986	Male	White	Hodgkin lymphoma	none	FALSE	1009	7038.62	0	147.656	0	0	0	117.969	43.75	TRUE	-	-
SJWLM041720_G1	FALSE	24.84	5.6078	Female	White	Wilms tumor	none	FALSE	634.36	0	0	177.011	0	2.29885	0	0	18.3908	N/A	-	-
SJWLM018912_G1	FALSE	25.25	5.07945	Female	White	Wilms tumor	none	FALSE	634.36	4400.08	895.385	171.212	0	6.06061	900	0	22.7273	N/A	-	-
SJRHB019835_G1	FALSE	31.61	10.4986	Female	White	Rhabdomyosarcoma	none	FALSE	1072.62	11562	182	441	0	3.84615	0	0	56	N/A	-	-
SJHL041563_G1	FALSE	38.08	18.3808	Female	White	Hodgkin lymphoma	none	FALSE	2764.04	0	0	0	0	0	0	0	0	FALSE	-	-
SJCNS019174_G1	FALSE	31.7	13.1562	Male	White	Central nervous system (CNS)	none	FALSE	2315.02	10000	375	0	0	0	0	0	16.6667	N/A	-	-
SJALL003606_G1	FALSE	32.84	13.1753	Male	White	Acute lymphoblastic leukemia	none	TRUE	0	9278.47	0	50.3425	0	0	19294.2	22570.9	47.9452	N/A	-	-
SJWLM019701_G1	FALSE	29.43	10.4247	Female	Black	Wilms tumor	none	FALSE	0	0	0	178.295	0	5.51181	0	0	21.2598	N/A	-	-
SJWLM018902_G1	FALSE	29.1	4.22131	Female	White	Wilms tumor	none	TRUE	634.36	0	0	207.937	0	9.52381	0	0	41.2698	N/A	-	-
SJALL041457_G1	FALSE	24.91	8.81644	Male	Black	Acute lymphoblastic leukemia	none	FALSE	252.54	9466.09	0	107.965	0	0	16365.8	24885.9	61.0619	N/A	-	-
SJNBL018752_G1	FALSE	28.52	4.26575	Female	Black	Neuroblastoma	none	FALSE	0	0	0	0	0	0	0	0	0	N/A	-	-
SJNHL042747_G1	FALSE	24.93	5.43799	Male	White	Non-Hodgkin lymphoma	none	FALSE	0	7116.28	0	197.674	0	0	0	4130.23	10.4651	N/A	-	-
SJALL041378_G1	FALSE	22.1	1.04384	Male	White	Acute lymphoblastic leukemia	none	FALSE	0	0	0	25.5102	0	0	600	4565.24	51.0204	N/A	-	-
SJCNS019184_G1	FALSE	25.07	8.40437	Male	Black	Central nervous system (CNS)	autologous	TRUE	3239.22	0	0	0	0	0	0	0	1.5	N/A	-	-
SJNHL041629_G1	FALSE	27.58	7.73699	Male	White	Non-Hodgkin lymphoma	none	FALSE	0	2326.26	0	124.242	0	0	0	599.657	10.101	N/A	-	-
SJALL018503_G1	FALSE	28.11	5.07852	Female	White	Acute lymphoblastic leukemia	none	FALSE	0	0	0	25.6579	0	0	2579.28	11615.4	6.57895	N/A	-	-
SJNHL042745_G1	FALSE	26.18	5.72603	Male	White	Non-Hodgkin lymphoma	none	FALSE	0	3303.9	4371.23	200	0	0	0	183.544	12.987	N/A	-	-
SJCNS019131_G1	FALSE	35.69	10.0877	Male	White	Central nervous system (CNS)	none	FALSE	658.94	0	0	0	0	0	0	0	0	N/A	-	-
SJHL019338_G1	FALSE	38.85	16.7002	Female	White	Hodgkin lymphoma	none	FALSE	2876.44	0	0	0	0	0	0	0	0	FALSE	-	-
SJNHL042752_G1	FALSE	32.33	15.2329	Male	White	Non-Hodgkin lymphoma	none	FALSE	0	7996.25	0	53.125	0	0	14248.4	24576.1	43.75	N/A	-	-
SJALL041460_G1	FALSE	30.96	15.2192	Male	White	Acute lymphoblastic leukemia	none	FALSE	0	8639.26	0	50.3106	0	0	14358.3	22241.4	44.7205	N/A	-	-
SJCNS001212_G1	FALSE	33.48	12.8795	Male	White	Central nervous system (CNS)	none	FALSE	0	0	0	0	0	0	0	0	0	N/A	-	-
SJWLM018906_G1	FALSE	28.84	5.94521	Female	Black	Wilms tumor	none	TRUE	688.76	0	0	166.667	0	8.64198	0	0	39.5062	N/A	-	-
SJHL019335_G1	FALSE	38.05	14.3145	Female	Black	Hodgkin lymphoma	none	FALSE	905.8	0	0	201.258	0	0	0	161.006	48.4277	FALSE	-	-
SJHL018707_G1	FALSE	33.97	14.7042	Female	White	Hodgkin lymphoma	none	FALSE	1009	0	0	204.196	0	0	0	165.035	48.951	FALSE	-	-
SJNBL019422_G1	FALSE	27.33	0.671233	Male	White	Neuroblastoma	none	TRUE	0	1050	730.435	34.7826	0	0	806.522	0	0	N/A	-	-
SJHL018686_G1	FALSE	37.05	12.8299	Female	White	Hodgkin lymphoma	none	FALSE	1714.72	6950.99	0	148.462	57.6923	0	0	0	54.8968	TRUE	BRCA2_Q2539*	BRCA2_Q2539*
SJHL019352_G1	FALSE	31.14	12.9425	Male	White	Hodgkin lymphoma	none	FALSE	1351.9	7618.94	0	158.96	0	0	0	127.168	44.8919	TRUE	-	-
SJALL041408_G1	FALSE	26.4	5.58356	Female	White	Acute lymphoblastic leukemia	none	FALSE	442.12	0	0	25.3521	0	0	2595.48	10672.7	4.22535	N/A	-	-
SJALL041422_G1	FALSE	24.73	4.67397	Female	White	Acute lymphoblastic leukemia	none	FALSE	0	0	0	25.3425	0	0	1700	8024.29	4.10959	N/A	-	-
SJHL041572_G1	FALSE	23.67	7.12329	Male	White	Hodgkin lymphoma	none	FALSE	105.7	0	0	207.778	0	0	0	164.444	48.8889	FALSE	-	-
SJALL041045_G1	FALSE	28.68	1.57524	Male	White	Acute lymphoblastic leukemia	none	FALSE	516.02	10458.3	0	24.4898	0	0	16093.6	5365.24	59.1837	N/A	-	-
SJCNS018577_G1	FALSE	28.7	6.83288	Male	White	Central nervous system (CNS)	none	FALSE	2788.16	0	0	0	0	0	0	0	0	N/A	-	-
SJALL041446_G1	FALSE	22.91	6.39178	Male	White	Acute lymphoblastic leukemia	none	TRUE	0	9093.68	0	51.5789	0	0	1858.06	21252.1	105.263	N/A	-	-
SJOS018816_G1	FALSE	34.03	11.806	Female	White	Osteosarcoma	none	FALSE	0	9544.14	2751.45	370.29	0	0	0	108014	0	N/A	-	-
SJHL017909_G1	FALSE	29.99	8.08493	Female	Black	Hodgkin lymphoma	none	FALSE	968.78	8261.76	0	200	0	0	400	77.2358	57.5	TRUE	-	-
SJALL040941_G1	FALSE	42.06	17.2437	Male	White	Acute lymphoblastic leukemia	none	FALSE	1391.82	4591.63	0	364.508	0	0	5508.28	17061.6	17.748	N/A	-	-
SJCNS042850_G1	FALSE	35.58	11.1042	Male	White	Central nervous system (CNS)	none	FALSE	0	0	0	0	0	0	0	0	0	N/A	-	-
SJNHL040948_G1	FALSE	30.59	7.74044	Male	White	Non-Hodgkin lymphoma	none	FALSE	0	6862.07	0	468.966	0	0	4080	188.793	31.8966	N/A	-	-
SJRHB003948_G2	FALSE	28.69	2.40883	Male	White	Rhabdomyosarcoma	none	FALSE	1049.8	0	0	355.738	0	9.67742	0	0	68.8525	N/A	-	-
SJHL019348_G1	FALSE	28.67	9.47367	Male	White	Hodgkin lymphoma	none	TRUE	1299.36	6997.48	0	154.639	0	0	0	123.711	45.9369	TRUE	-	-
SJCNS001204_G1	FALSE	36.36	13.9753	Female	White	Central nervous system (CNS)	none	FALSE	0	0	0	0	0	0	0	0	0	N/A	-	-
SJHL042008_G1	FALSE	37.61	19.3552	Female	White	Hodgkin lymphoma	none	FALSE	1009	6237.57	0	152.5	30	0	0	0	44.2824	TRUE	-	-
SJAML019108_G1	FALSE	34.87	9.29142	Male	White	Acute myeloid leukemia	autologous	FALSE	0	0	0	101.95	0	0	7174	58.3	0	N/A	-	-
SJALL040960_G1	FALSE	39.43	18.7918	Male	White	Acute lymphoblastic leukemia	none	FALSE	268.14	7130.54	0	48.5955	0	0	9556.94	20461.8	38.2022	N/A	-	-
SJHL018701_G1	FALSE	38.04	16.8094	Male	White	Hodgkin lymphoma	none	FALSE	1009	0	0	207.429	0	0	0	164.571	49.1429	FALSE	-	-
SJALL042547_G1	FALSE	36	16.5171	Female	White	Acute lymphoblastic leukemia	none	FALSE	207.54	9413.08	0	47.9452	0	0	10207.3	20829.6	54.7945	N/A	-	-
SJALL019096_G1	FALSE	30.32	14.3973	Male	White	Acute lymphoblastic leukemia	none	FALSE	0	8959.24	0	49.4624	0	0	14778.6	22250.8	39.1304	N/A	-	-
SJNHL019484_G1	FALSE	31.77	7.26057	Female	White	Non-Hodgkin lymphoma	none	FALSE	0	7284.62	0	207.692	0	0	0	4247.91	8.97436	N/A	-	-
SJALL041365_G1	FALSE	28.03	5.07945	Female	White	Acute lymphoblastic leukemia	none	FALSE	337.12	9214.44	0	25.2747	0	0	12878.2	4137.03	54.9451	N/A	-	-
SJCNS019139_G1	FALSE	32.03	7.09477	Male	Black	Central nervous system (CNS)	none	FALSE	967.12	0	0	0	0	0	0	0	0	N/A	-	-
SJCNS019167_G1	FALSE	30.12	10.7315	Male	White	Central nervous system (CNS)	none	FALSE	2882.92	0	2947.83	0	0	0	843.478	0	0	N/A	-	-
SJNHL019489_G1	FALSE	35.9	11.4658	Male	White	Non-Hodgkin lymphoma	none	FALSE	0	5874.02	0	372.441	0	0	3141.41	200.787	29.1339	N/A	-	-
SJHL043457_G1	FALSE	34.28	6.66456	Male	White	Hodgkin lymphoma	none	FALSE	1093.38	10041.9	0	225.581	90.6977	0	0	0	87.2093	TRUE	-	-
SJALL041434_G1	FALSE	25.28	7.00253	Male	Black	Acute lymphoblastic leukemia	none	FALSE	0	5100	0	150	0	0	0	3998.69	8.75	N/A	-	-
SJCNS001201_G1	FALSE	26.58	3.19178	Male	White	Central nervous system (CNS)	none	FALSE	967.12	0	0	0	0	0	0	0	0	N/A	-	-
SJHL041566_G1	FALSE	36.94	16.7918	Female	White	Hodgkin lymphoma	none	FALSE	2090.12	0	0	0	0	0	0	0	0	FALSE	-	-
SJWLM019677_G1	FALSE	26.29	1.10939	Female	White	Wilms tumor	none	FALSE	0	0	0	179.167	0	8.33333	0	0	39.5833	N/A	-	-
SJALL040954_G1	FALSE	37.89	16.5233	Male	White	Acute lymphoblastic leukemia	none	TRUE	0	8445.22	0	50	0	0	14243.3	21840.3	42.1053	N/A	-	-
SJALL041376_G1	FALSE	35.61	13.0466	Male	White	Acute lymphoblastic leukemia	none	FALSE	207.54	8179.86	0	25.1724	0	0	13689.8	5381.38	46.8966	N/A	-	-
SJNHL019488_G1	FALSE	39.16	13.789	Male	White	Non-Hodgkin lymphoma	none	FALSE	1677.42	6018.93	0	400.592	0	0	3660.24	79.8817	22.4852	N/A	-	-
SJEWS041500_G1	FALSE	38.69	15.2344	Female	White	Ewing sarcoma family of tumors	none	FALSE	0	11703.7	0	246.341	0	5.4878	0	0	10.3659	N/A	-	-
SJHL018723_G1	FALSE	33.75	16.5251	Male	White	Hodgkin lymphoma	none	FALSE	1009	6900	0	157.047	0	0	0	126.174	45.0839	TRUE	-	-
SJALL019086_G1	FALSE	22.79	9.08436	Male	White	Acute lymphoblastic leukemia	none	FALSE	0	0	0	51.6484	0	0	1219.35	24355.8	60.4396	N/A	-	-
SJALL019070_G1	FALSE	26.63	9.01918	Male	White	Acute lymphoblastic leukemia	none	FALSE	0	0	0	24.3056	0	0	913.534	25241.1	48.6111	N/A	-	-
SJALL041403_G1	FALSE	24.47	3.67945	Male	White	Acute lymphoblastic leukemia	none	FALSE	0	0	0	24.5902	0	0	3939.34	11691.4	6.55738	N/A	-	-
SJEWS041501_G2	FALSE	40.09	13.4667	Male	White	Ewing sarcoma family of tumors	none	TRUE	0	12041.5	0	367.213	0	5.49451	0	0	12.0879	N/A	-	-
SJALL018510_G1	FALSE	33.34	10.8985	Female	White	Acute lymphoblastic leukemia	none	FALSE	252.54	9069.09	0	37.7273	0	0	15766.4	19553.6	58.1818	N/A	-	-
SJOS042101_G1	FALSE	31.03	13.8849	Female	White	Osteosarcoma	none	TRUE	0	0	354.359	439.487	0	0	0	82051.3	0	N/A	-	-
SJHL019322_G1	FALSE	41.88	15.5325	Male	White	Hodgkin lymphoma	none	FALSE	1526.44	9701.13	0	195.732	78.0488	0	0	0	73.9249	TRUE	-	-
SJCNS019137_G1	FALSE	27.81	2.59344	Female	White	Central nervous system (CNS)	none	FALSE	3396.26	5034.55	79.5918	0	0	0	259.184	0	10.9091	N/A	-	-
SJALL019083_G1	FALSE	25.27	10.8683	Male	Black	Acute lymphoblastic leukemia	none	TRUE	252.54	9399.15	0	51.2712	0	0	17226.3	22540.7	56.7797	N/A	-	-
SJRHB019834_G1	FALSE	24.17	3.67671	Male	White	Rhabdomyosarcoma	none	FALSE	913.8	15157.8	0	369.565	0	7.57576	0	0	34.7826	N/A	-	-
SJALL018508_G1	FALSE	32.64	10.411	Female	White	Acute lymphoblastic leukemia	none	FALSE	0	0	0	25.2525	0	0	1482.18	11902.4	6.06061	N/A	-	-
SJHL041561_G1	FALSE	37.97	17.1535	Female	Black	Hodgkin lymphoma	none	FALSE	1577.92	6764.84	0	96.732	38.5621	0	0	0	42.1192	TRUE	-	-
SJALL041418_G1	FALSE	34.78	14.9973	Male	White	Acute lymphoblastic leukemia	none	FALSE	207.54	0	0	25	0	0	1837.78	7609.68	4.16667	N/A	-	-
SJHL018677_G1	FALSE	36.24	10.7407	Female	White	Hodgkin lymphoma	none	FALSE	1270.46	6883.42	0	119.643	50	0	0	0	47.3214	TRUE	-	-
SJALL019751_G1	FALSE	23.91	2.54795	Male	White	Acute lymphoblastic leukemia	none	FALSE	0	0	0	25	0	0	2572.73	7999.26	6.25	N/A	-	-
SJALL042675_G1	FALSE	33.9	12.3616	Female	White	Acute lymphoblastic leukemia	none	FALSE	0	0	0	26.7857	0	0	2858.04	9215.07	6.25	N/A	-	-
SJWLM019678_G1	FALSE	28.44	2.44036	Female	White	Wilms tumor	none	FALSE	452.58	0	0	205.769	0	9.61538	0	0	44.2308	N/A	-	-
SJOS018815_G1	FALSE	34.05	13.679	Male	White	Osteosarcoma	none	FALSE	0	9716.92	2800	375	0	0	0	108000	0	N/A	-	-
SJRHB019589_G1	FALSE	33.48	5.69041	Male	White	Rhabdomyosarcoma	none	FALSE	0	0	0	0	0	11.6279	0	0	55.814	N/A	-	-
SJNHL019494_G1	FALSE	31.98	12.1151	Male	White	Non-Hodgkin lymphoma	none	FALSE	0	2267.74	0	120.968	0	0	0	0	7.52688	N/A	-	-
SJALL041861_G1	FALSE	27.97	8.77808	Male	White	Acute lymphoblastic leukemia	none	FALSE	0	0	0	51.3158	0	0	1234.51	23786.8	51.7544	N/A	-	-
SJOS018810_G1	FALSE	37.22	10.369	Female	White	Osteosarcoma	none	FALSE	0	9723.91	400	389.844	0	0	0	108031	0	N/A	-	-
SJHL041559_G1	FALSE	37.54	16.3722	Female	White	Hodgkin lymphoma	none	FALSE	983.22	8493.78	0	146.746	58.5799	0	0	0	64.3578	TRUE	-	-
SJALL040956_G1	FALSE	30.3	9.21311	Male	White	Acute lymphoblastic leukemia	none	FALSE	0	8855.88	0	51.4563	0	0	14939.2	23931.1	59.2233	N/A	-	-
SJCNS018584_G1	FALSE	28.65	4.19945	Female	White	Central nervous system (CNS)	none	FALSE	0	0	0	0	0	0	0	0	0	N/A	-	-
SJALL019081_G1	FALSE	34.53	17.3589	Male	White	Acute lymphoblastic leukemia	none	FALSE	0	5368.72	0	245.506	0	0	2573.3	24432.1	6.70391	N/A	-	-
SJCNS018595_G1	FALSE	33.98	15.9973	Male	White	Central nervous system (CNS)	none	FALSE	530.74	0	0	0	0	0	0	0	0	N/A	-	-
SJAML007008_G1	FALSE	30.51	14.7877	Male	White	Acute myeloid leukemia	autologous	FALSE	0	0	0	45.05	0	0	400	15.6	0	N/A	-	-
SJOS019542_G1	FALSE	37.91	15.582	Male	White	Osteosarcoma	none	FALSE	0	10013	2885.26	375.926	0	0	0	108543	0	N/A	-	-
SJALL040976_G1	FALSE	26.1	4.92031	Male	White	Acute lymphoblastic leukemia	none	FALSE	0	6090.57	0	72.3214	0	0	2563.86	10408.8	28.9908	N/A	-	-
SJHL019320_G1	FALSE	42.55	16.9781	Female	White	Hodgkin lymphoma	none	TRUE	1740.64	9122.95	0	198.673	79.2035	0	0	0	60.7376	TRUE	-	-
SJHL018682_G1	FALSE	36.07	11.5315	Female	White	Hodgkin lymphoma	none	TRUE	1677.26	6238.46	0	158.475	48.3051	0	0	0	55.6714	TRUE	-	-
SJCNS041488_G1	FALSE	23.92	7.87945	Female	White	Central nervous system (CNS)	none	FALSE	2857.52	6471.84	3016.5	0	0	0	1141.75	0	0	N/A	-	-
SJHL018721_G1	FALSE	29.9	12.4153	Male	White	Hodgkin lymphoma	none	FALSE	485.04	0	0	200	0	0	0	160	46.6667	FALSE	-	-
SJALL041449_G1	FALSE	21.34	3.01023	Male	White	Acute lymphoblastic leukemia	none	FALSE	0	0	0	0	0	0	0	3525.48	71.0372	N/A	-	-
SJHL019318_G1	FALSE	38.34	12.126	Male	Black	Hodgkin lymphoma	none	TRUE	1707.66	7068.59	0	192.701	76.6423	0	0	0	65.7993	TRUE	-	-
SJCNS018586_G1	FALSE	27.59	7.93699	Male	White	Central nervous system (CNS)	none	FALSE	2857.52	7670.59	268.235	0	0	0	896.471	0	7.05882	N/A	-	-
SJCNS019762_G1	FALSE	23.11	7.35616	Male	White	Central nervous system (CNS)	none	FALSE	0	0	0	0	0	0	0	0	0	N/A	-	-
SJHL019787_G1	FALSE	37.8	15.4385	Male	White	Hodgkin lymphoma	none	FALSE	1031.32	8773.06	0	196.894	78.2609	0	0	0	70.4754	TRUE	-	-
SJALL003120_G1	FALSE	24.78	10.216	Female	Other	Acute lymphoblastic leukemia	none	FALSE	0	10338	0	50.5	0	0	14767.9	14548.7	63	N/A	TP53_R280S	-
SJALL041400_G1	FALSE	40.15	17.9726	Male	White	Acute lymphoblastic leukemia	none	FALSE	268.14	0	0	25	0	0	3179.88	11709.9	4.87805	N/A	-	-
SJALL003814_G1	FALSE	28.48	13.9342	Female	Black	Acute lymphoblastic leukemia	none	FALSE	0	8965.85	0	51.2821	0	0	5872.42	23361.5	84.6154	N/A	-	-
SJHL019357_G1	FALSE	33	14.2466	Female	White	Hodgkin lymphoma	none	TRUE	1009	6849.69	0	155.484	0	0	0	123.871	44.2276	TRUE	-	-
SJLGG001203_G1	FALSE	25.78	5.52603	Female	White	Central nervous system (CNS)	none	FALSE	0	0	0	0	0	0	0	0	0	N/A	-	-
SJNHL041628_G1	FALSE	30.68	10.7881	Male	White	Non-Hodgkin lymphoma	none	FALSE	0	7058.82	0	196.078	0	0	0	4274.05	8.82353	N/A	-	-
SJALL041366_G1	FALSE	26.2	3.34247	Female	White	Acute lymphoblastic leukemia	none	FALSE	0	10233.9	0	26.6129	0	0	16197.4	4238.71	58.0645	N/A	-	-
SJCNS041494_G1	FALSE	28.42	13.1123	Male	White	Central nervous system (CNS)	none	FALSE	0	0	0	0	0	0	0	0	0	N/A	-	-
SJRHB042115_G1	FALSE	31.67	8.56682	Female	White	Rhabdomyosarcoma	none	FALSE	1944.78	15766	0	363.699	0	8.39161	0	0	23.9726	N/A	-	-
SJCNS019150_G1	FALSE	32.28	6.13944	Female	White	Central nervous system (CNS)	none	FALSE	2245.26	0	0	0	0	0	0	0	0	N/A	-	-
SJCNS019151_G1	FALSE	37.72	15.9288	Female	Black	Central nervous system (CNS)	none	FALSE	3204.92	0	2765.28	0	0	0	790.278	0	0	N/A	-	-
SJHL018683_G1	FALSE	37.41	12.8807	Male	White	Hodgkin lymphoma	none	FALSE	1526.44	8601.67	0	145.833	58.3333	0	0	0	60.2697	TRUE	PTCH1_V132_E3splice	-
SJALL041388_G1	FALSE	31.06	9.09502	Male	Black	Acute lymphoblastic leukemia	none	FALSE	252.54	9240.59	0	25.2577	0	0	17589.8	4160.82	54	N/A	-	-
SJALL041392_G1	FALSE	32.49	10.9248	Male	Black	Acute lymphoblastic leukemia	none	FALSE	252.54	8526.17	0	37.3874	0	0	14215.7	4134.36	53.1532	N/A	-	-
SJWLM041716_G1	FALSE	28.24	8.13151	Male	Black	Wilms tumor	none	FALSE	745.66	0	0	208.333	0	9.52381	0	0	42.8571	N/A	-	-
SJNHL019480_G1	FALSE	44.32	19.5836	Male	White	Non-Hodgkin lymphoma	none	FALSE	0	2267.28	0	120.737	0	0	0	652.535	6.45161	N/A	-	-
SJCNS019141_G1	FALSE	35.41	7.66027	Male	White	Central nervous system (CNS)	none	FALSE	0	0	0	0	0	0	0	0	0	N/A	-	-
SJHL042724_G1	FALSE	25.72	9.58904	Male	White	Hodgkin lymphoma	none	TRUE	161.12	6895.97	0	151.754	0	0	0	121.053	42.8025	TRUE	-	-
SJNBL019420_G1	FALSE	26.64	0.550685	Male	Black	Neuroblastoma	none	FALSE	0	0	0	0	0	0	0	0	0	N/A	-	-
SJCNS018569_G1	FALSE	28.08	1.96164	Male	White	Central nervous system (CNS)	none	FALSE	1396.02	18370.9	0	0	0	0	0	0	32.7273	N/A	NF1_K615_E16splice	POLG_A467T
SJCNS019134_G1	FALSE	37.25	11.368	Female	White	Central nervous system (CNS)	none	FALSE	2857.52	0	336.154	0	0	0	1120.77	0	0	N/A	-	-
SJHL018714_G1	FALSE	35.22	17.3397	Male	White	Hodgkin lymphoma	none	TRUE	1000.4	0	0	198.049	0	0	0	159.024	47.3171	FALSE	-	-
SJLGG001209_G2	FALSE	29.01	8.2459	Male	White	Central nervous system (CNS)	none	FALSE	0	0	0	0	0	0	0	0	0	N/A	-	-
SJALL041860_G1	FALSE	23.51	4.88956	Male	White	Acute lymphoblastic leukemia	none	FALSE	0	9011.27	0	51.3889	0	0	14790	22875.9	56.9444	N/A	-	-
SJALL041456_G1	FALSE	23.18	6.87397	Female	White	Acute lymphoblastic leukemia	none	FALSE	0	9342.5	0	53.8462	0	0	12440.5	23046.2	48.7179	N/A	-	-
SJCNS019186_G1	FALSE	33	16.3415	Male	White	Central nervous system (CNS)	none	TRUE	4035.82	0	0	0	0	0	0	0	0	N/A	-	-
SJCNS019145_G1	FALSE	25.97	3.0137	Male	Other	Central nervous system (CNS)	none	FALSE	2161.56	28719.4	369.355	0	0	0	1200	0	35.4839	N/A	-	-
SJRHB040975_G1	FALSE	26.83	8.72404	Female	White	Rhabdomyosarcoma	none	FALSE	1788.08	19926.4	0	0	0	14.9425	0	0	47.1264	N/A	-	-
SJALL041415_G1	FALSE	25.6	2.65277	Female	White	Acute lymphoblastic leukemia	none	FALSE	0	0	0	0	0	0	0	6278.74	29.3103	N/A	-	-
SJALL018499_G1	FALSE	25.78	2.71781	Female	White	Acute lymphoblastic leukemia	none	TRUE	516.02	10107.7	0	25.3846	0	0	16736.9	4036.92	60	N/A	-	-
SJRHB041689_G1	FALSE	29.19	14.611	Female	White	Rhabdomyosarcoma	autologous	FALSE	2783.94	34708.8	0	120	0	8.9	1200	2402.1	39.4	N/A	-	-
SJALL041367_G1	FALSE	22.89	1.4137	Female	White	Acute lymphoblastic leukemia	none	FALSE	516.02	10384.6	0	25	0	0	17953.8	4350.49	53.7037	N/A	-	-
SJWLM019700_G1	FALSE	32.69	15.0822	Female	Black	Wilms tumor	none	FALSE	915.4	3095.37	1516.47	147.59	0	6.0241	925.301	0	18.0723	N/A	-	-
SJALL040955_G1	FALSE	30.4	8.96655	Female	White	Acute lymphoblastic leukemia	none	FALSE	0	0	0	25	0	0	883.333	20651.5	55.6818	N/A	-	-
SJAML042540_G1	FALSE	27.18	0.494536	Female	White	Acute myeloid leukemia	none	FALSE	0	0	0	106.667	0	0	11011.6	71.1111	0	N/A	-	-
SJALL041448_G1	FALSE	21.09	4.36417	Male	White	Acute lymphoblastic leukemia	none	FALSE	0	9739.29	0	52.3529	0	0	20211.9	23585.8	58.8235	N/A	-	-
SJWLM019686_G1	FALSE	27.91	4.72877	Female	White	Wilms tumor	none	FALSE	0	0	0	0	0	2.77778	0	0	8.33333	N/A	-	-
SJCNS019182_G1	FALSE	24.49	4.27918	Female	White	Central nervous system (CNS)	none	FALSE	2821.26	15258.8	579.71	0	0	0	0	0	14.4928	N/A	-	-
SJCNS019177_G1	FALSE	26.15	7.17534	Male	White	Central nervous system (CNS)	none	TRUE	1054.62	0	0	0	0	0	0	0	0	N/A	-	-
SJHL018716_G1	FALSE	37.96	20.459	Female	White	Hodgkin lymphoma	none	FALSE	891.76	6174.25	0	192.683	58.5366	0	0	0	42.7582	TRUE	-	-
SJALL018516_G1	FALSE	24.46	4.01644	Female	White	Acute lymphoblastic leukemia	none	FALSE	0	0	0	25.8333	0	0	895.238	20117.1	8.33333	N/A	-	-
SJALL019064_G1	FALSE	26.91	2.96712	Female	White	Acute lymphoblastic leukemia	none	FALSE	0	0	0	0	0	0	0	0		N/A	-	-
SJALL018511_G1	FALSE	28.41	6.48482	Male	White	Acute lymphoblastic leukemia	none	FALSE	337.12	8511.9	0	53.6585	0	0	14384.3	19612.1	60.9756	N/A	-	-
SJNBL019430_G1	FALSE	23.33	2.10674	Female	White	Neuroblastoma	none	FALSE	0	7107.69	936.538	173.077	0	0	4236	0	0	N/A	-	-
SJHL019323_G1	FALSE	31.19	4.93693	Male	White	Hodgkin lymphoma	none	TRUE	0	7457.14	0	148.75	58.75	0	0	0	44.3333	TRUE	-	-
SJALL041445_G1	FALSE	22.23	5.16453	Male	White	Acute lymphoblastic leukemia	none	FALSE	91.94	8909.99	0	98.5915	0	0	1225	27056.3	5.6338	N/A	-	-
SJALL041390_G1	FALSE	24.62	4.03552	Female	White	Acute lymphoblastic leukemia	none	TRUE	337.12	9941.86	0	24.6914	0	0	16939.5	4210	59.2593	N/A	-	-
SJOS041641_G1	FALSE	26.03	4.7944	Male	White	Osteosarcoma	none	FALSE	0	9777.96	400	349.333	0	0	0	107893	0	N/A	-	-
SJCNS019146_G1	FALSE	25.66	2.30959	Female	White	Central nervous system (CNS)	none	FALSE	0	0	0	0	0	0	0	0	0	N/A	-	-
SJNHL019493_G1	FALSE	25.88	5.81582	Female	Black	Non-Hodgkin lymphoma	none	TRUE	0	3055.81	0	102.326	0	0	0	2132.08	3.48837	N/A	-	-
SJALL004736_G1	FALSE	22.11	7.40586	Male	White	Acute lymphoblastic leukemia	none	FALSE	0	0	0	48.9583	0	0	1203.16	24252.4	56.25	N/A	-	FANCI_Y487*
SJHL019776_G1	FALSE	55.13	10.5342	Male	White	Hodgkin lymphoma	none	FALSE	1174.72	5226.09	0	0	0	0	0	0	25.2174	FALSE	-	-
SJNHL018759_G1	FALSE	58.29	10.5397	Male	White	Non-Hodgkin lymphoma	none	FALSE	846.72	0	0	0	0	0	0	0	5.69106	N/A	-	-
SJHL019246_G1	FALSE	55.03	7.94247	Male	Black	Hodgkin lymphoma	none	FALSE	1069.84	7595.74	0	0	0	0	0	0	25.5319	FALSE	-	-
SJALL018923_G1	FALSE	54.74	7.34521	Male	White	Acute lymphoblastic leukemia	none	TRUE	0	21723.7	0	0	0	0	0	2152.58	119.565	N/A	-	-
SJOS019507_G1	FALSE	56.02	8.72329	Female	Black	Osteosarcoma	none	TRUE	0	3795.18	0	0	0	0	0	0	0	N/A	-	-
SJHL041526_G1	FALSE	57.94	15.7562	Male	White	Hodgkin lymphoma	none	TRUE	1888.8	22031.3	0	0	0	0	0	0	92.3605	FALSE	-	-
SJWLM019629_G1	FALSE	52.65	5.09315	Male	Black	Wilms tumor	none	FALSE	1673.66	0	0	0	0	8.42063	0	0	16.1406	N/A	-	-
SJALL041842_G1	FALSE	51.41	6.56506	Male	White	Acute lymphoblastic leukemia	none	FALSE	0	0	0	0	0	0	0	0	7.77778	N/A	-	-
SJRB019815_G1	FALSE	45.12	1.92603	Male	Black	Retinoblastoma	none	TRUE	0	13024.1	0	0	0	0	0	0	68.5185	N/A	RB1_R445*	LIG4_S205fs
SJNBL019380_G1	FALSE	47.51	0.328767	Female	White	Neuroblastoma	none	FALSE	288.02	6790	0	0	0	0	0	0	35	N/A	FH_P174R	-
SJHL019247_G1	FALSE	65.89	19.874	Female	White	Hodgkin lymphoma	none	TRUE	1840.9	13365.3	0	0	0	0	0	0	183.007	FALSE	-	-
SJALL018924_G1	FALSE	51.65	5.50137	Female	White	Acute lymphoblastic leukemia	none	FALSE	494.62	0	0	0	0	0	0	327.381	10	N/A	-	POLG_A467T
SJMEL019375_G1	FALSE	60.64	14.7973	Male	White	Melanoma	none	FALSE	0	0	0	0	0	0	0	0	0	N/A	-	-
SJWLM017962_G1	FALSE	48.02	3.21704	Male	White	Wilms tumor	none	FALSE	839.58	0	0	0	0	0	0	0	18.8679	N/A	-	-
SJALL018925_G1	FALSE	47.81	2.13151	Female	White	Acute lymphoblastic leukemia	none	TRUE	763.52	23418.8	0	125	0	0	0	2851.67	100.91	N/A	-	-
SJWLM019630_G1	FALSE	46.51	2.16986	Male	White	Wilms tumor	none	TRUE	205.62	0	0	0	0	3.7037	0	0	14.8148	N/A	-	-
SJRB019555_G1	FALSE	47.55	2.38327	Male	White	Retinoblastoma	none	TRUE	0	13525	0	0	0	0	0	0	70	N/A	-	-
SJALL018926_G1	FALSE	51.96	5.39424	Male	White	Acute lymphoblastic leukemia	none	FALSE	494.62	13230.4	0	0	0	0	0	1301.45	54.4118	N/A	-	-
SJALL018400_G1	FALSE	48.37	2.85982	Female	White	Acute lymphoblastic leukemia	none	FALSE	708.52	22366.7	0	0	0	0	0	2238.1	56.6667	N/A	-	-
SJHL019248_G1	FALSE	60.91	15.612	Female	White	Hodgkin lymphoma	none	TRUE	1703.18	1331.52	0	0	0	0	0	0	9.23913	FALSE	-	-
SJNHL018760_G1	FALSE	54.1	9.4296	Male	White	Non-Hodgkin lymphoma	none	FALSE	219.98	7089.52	0	0	0	0	0	1133.6	50.4	N/A	-	-
SJALL042652_G1	FALSE	53.4	10.0816	Female	White	Acute lymphoblastic leukemia	none	TRUE	366.84	11565.9	0	0	0	0	0	1739.06	57.5	N/A	-	-
SJNHL041608_G1	FALSE	49.77	8.53902	Female	White	Non-Hodgkin lymphoma	none	FALSE	947.44	4843.75	0	0	0	0	0	915	40	N/A	-	-
SJWLM018877_G1	FALSE	51.67	3.08724	Female	White	Wilms tumor	none	FALSE	886.32	0	0	0	0	13.9683	0	0	53.3333	N/A	-	-
SJALL018927_G1	FALSE	47.37	2.34994	Female	White	Acute lymphoblastic leukemia	none	FALSE	736.02	19236.2	0	0	0	0	0	2072.84	63.7931	N/A	-	-
SJALL041167_G1	FALSE	43.36	2.9608	Female	White	Acute lymphoblastic leukemia	none	TRUE	736.02	16590	0	0	0	0	0	1718.33	66.6667	N/A	-	-
SJALL018928_G1	FALSE	48.62	2.08127	Female	White	Acute lymphoblastic leukemia	none	TRUE	681.02	25392	0	0	0	0	0	2740.88	70	N/A	-	-
SJALL017885_G1	FALSE	59.7	15.8607	Male	White	Acute lymphoblastic leukemia	none	FALSE	298.44	27078.8	0	0	0	0	0	2766.47	74.6988	N/A	-	-
SJALL018929_G1	FALSE	46.79	2.39726	Male	White	Acute lymphoblastic leukemia	none	TRUE	763.52	30090.7	0	75	0	0	0	3038.89	92	N/A	-	-
SJRHB041675_G1	FALSE	47.52	4.94689	Male	White	Rhabdomyosarcoma	none	TRUE	354.62	9808.33	0	0	0	9.72222	0	0	48.6111	N/A	-	-
SJALL018930_G1	FALSE	48.48	3.34684	Female	White	Acute lymphoblastic leukemia	none	FALSE	477.12	17280.4	0	0	0	0	0	1757.14	73.5849	N/A	-	-
SJALL042653_G1	FALSE	53.88	10.6866	Female	White	Acute lymphoblastic leukemia	none	TRUE	341.44	12918	0	0	0	0	0	2012	45	N/A	-	BLM_Q700*
SJALL041168_G1	FALSE	43.33	2.79335	Male	White	Acute lymphoblastic leukemia	none	FALSE	736.02	17868.8	0	0	0	0	0	1857.71	59.0164	N/A	-	-
SJALL041169_G1	FALSE	49	7.68579	Female	White	Acute lymphoblastic leukemia	none	FALSE	366.84	15222.5	0	0	0	0	0	1679.13	53.7037	N/A	-	-
SJALL018401_G1	FALSE	49.8	3.3605	Female	White	Acute lymphoblastic leukemia	none	FALSE	0	0	0	0	0	0	0	2017.46	6.15385	N/A	-	-
SJALL018402_G1	FALSE	46.23	1.98476	Male	White	Acute lymphoblastic leukemia	none	TRUE	1622.46	13280	0	50	0	0	0	1404	52.0833	N/A	-	ERCC2_R669fs
SJALL041170_G1	FALSE	43.46	3.26682	Female	White	Acute lymphoblastic leukemia	none	FALSE	1622.86	15187.3	0	50.7937	0	0	0	1690.48	52.381	N/A	-	-
SJHL019777_G1	FALSE	46.65	5.39282	Male	White	Hodgkin lymphoma	none	FALSE	733.3	30077.5	0	0	0	0	0	0	71.2766	TRUE	-	-
SJHL018647_G1	FALSE	53.84	8.22131	Male	White	Hodgkin lymphoma	none	FALSE	1174.38	22889.2	0	0	0	0	0	0	57.1429	FALSE	-	-
SJNHL018761_G1	FALSE	49.07	3.41171	Male	Black	Non-Hodgkin lymphoma	none	FALSE	152.7	10387.3	0	0	0	0	0	1032.84	40.2985	N/A	-	-
SJCNS019121_G1	FALSE	57.05	11.2746	Female	White	Central nervous system (CNS)	none	FALSE	646.24	9320.39	0	0	0	0	0	35.2941	52.4272	N/A	-	-
SJALL018403_G1	FALSE	46.29	2.3347	Male	White	Acute lymphoblastic leukemia	none	FALSE	2379.66	34460.3	0	46.0938	0	0	0	4915.32	106.25	N/A	-	-
SJALL018931_G1	FALSE	61.6	15.8057	Male	White	Acute lymphoblastic leukemia	none	FALSE	2097.12	23454.1	0	31.044	0	0	0	2579.57	47.2527	N/A	-	-
SJALL018404_G1	FALSE	45.65	1.91507	Female	White	Acute lymphoblastic leukemia	none	FALSE	1677.46	6828.57	0	48.1481	0	0	0	680.357	55.5556	N/A	-	-
SJOS019508_G1	FALSE	60.07	10.4085	Male	Black	Osteosarcoma	none	FALSE	0	20387.3	0	0	0	0	0	0	53.5211	N/A	-	-
SJALL018405_G1	FALSE	46.71	3.03288	Male	White	Acute lymphoblastic leukemia	none	FALSE	1589.76	14911.1	0	51.9231	0	0	0	1525.93	49.8575	N/A	-	-
SJHL042720_G1	FALSE	49.7	6.70411	Female	White	Hodgkin lymphoma	none	TRUE	2006.5		0	0	0	0	0	0		TRUE	-	-
SJALL041171_G1	FALSE	42.8	3.15616	Male	White	Acute lymphoblastic leukemia	none	FALSE	1504.16	17385.7	0	45.5357	0	0	0	2632.14	67.8571	N/A	-	-
SJALL018932_G1	FALSE	56.58	12.3582	Male	White	Acute lymphoblastic leukemia	none	FALSE	1855.22	5516.11	0	46.8571	0	0	0	565.302	20.5714	N/A	-	-
SJWLM018878_G1	FALSE	47.49	3.71781	Female	White	Wilms tumor	none	FALSE	0	0	0	364.583	0	19.4444	0	0	91.9643	N/A	-	-
SJALL041172_G1	FALSE	42.38	2.84932	Male	White	Acute lymphoblastic leukemia	none	TRUE	1649.96	23632.4	0	50	0	0	0	2400	58.5714	N/A	-	-
SJWLM019839_G1	FALSE	42.56	1.26614	Female	White	Wilms tumor	none	FALSE	171.22	0	0	0	0	2.27273	0	0	20.4545	N/A	-	-
SJALL041173_G1	FALSE	42.5	3.13699	Female	White	Acute lymphoblastic leukemia	none	FALSE	813.04	19266.1	0	25	0	0	0	2059.32	61.1111	N/A	-	ERCC2_R112H
SJWLM018880_G1	FALSE	44.75	0.167123	Male	White	Wilms tumor	none	FALSE	346.52	0	0	0	0	7.69231	0	0	42.3077	N/A	-	-
SJALL019709_G1	FALSE	45.6	5.19588	Male	White	Acute lymphoblastic leukemia	none	TRUE	1537.26	16864.9	0	23.7179	0	0	0	1776.62	47.4359	N/A	-	-
SJALL018933_G1	FALSE	51.59	7.84384	Female	White	Acute lymphoblastic leukemia	none	FALSE	1725.82	17823.8	0	50.6494	0	0	0	2856.25	67.5325	N/A	-	-
SJRHB018836_G1	FALSE	47.99	4.95009	Male	White	Rhabdomyosarcoma	none	TRUE	704.62	26404	0	0	0	8.53659	0	0	42.6829	N/A	-	-
SJALL018407_G1	FALSE	46.76	3.87671	Male	White	Acute lymphoblastic leukemia	none	FALSE	1622.86	17423.8	0	37.5	0	0	0	1757.14	56.6667	N/A	-	-
SJALL019710_G1	FALSE	43	3.01918	Female	White	Acute lymphoblastic leukemia	none	FALSE	459.62	26937.7	0	0	0	0	0	2720.15	65.5738	N/A	-	-
SJALL041175_G1	FALSE	45.49	5.69114	Female	White	Acute lymphoblastic leukemia	none	FALSE	1629.06	29382.8	0	50	0	0	0	2938.71	62.069	N/A	-	-
SJRB018825_G1	FALSE	47.03	4.35342	Female	White	Retinoblastoma	none	TRUE	0	0	0	0	0	0	0	0	0	N/A	-	-
SJALL018935_G1	FALSE	47.71	4.19399	Male	White	Acute lymphoblastic leukemia	none	TRUE	564.62		0		0	0	0	0		N/A	-	-
SJRB019556_G1	FALSE	43.87	1.48767	Male	White	Retinoblastoma	none	FALSE	0	15152.3	0	0	0	0	0	0	61.3636	N/A	-	-
SJNPC019501_G1	FALSE	56.48	14.3721	Male	Black	Nasopharyngeal carcinoma	none	TRUE	606.18	8435.58	0	0	0	0	0	0	0	N/A	-	-
SJRB017937_G1	FALSE	39.62	0.964384	Male	White	Retinoblastoma	none	FALSE	1231.02	12079.6	0	0	0	0	0	0	52.6531	N/A	RB1_Copy loss	-
SJRB019557_G1	FALSE	43.44	1.2274	Female	White	Retinoblastoma	none	FALSE	818.52	14680.9	0	0	0	0	0	0	59.5745	N/A	RB1_L665fs	-
SJNHL018762_G1	FALSE	56.07	10.7008	Male	White	Non-Hodgkin lymphoma	none	FALSE	279.92	0	0	0	0	0	0	0	0	N/A	-	-
SJRB019558_G1	FALSE	41.96	0.410959	Male	White	Retinoblastoma	none	FALSE	670.66	12280	0	0	0	0	0	0	43.3333	N/A	RB1_I297fs	-
SJSTS019600_G1	FALSE	42.97	2.69315	Female	White	Soft tissue sarcoma	none	FALSE	1035	5543.86	0	0	0	42.1053	0	0	26.3158	N/A	-	-
SJRB018826_G1	FALSE	41.99	0.654795	Female	White	Retinoblastoma	none	FALSE	708.52	14595.7	0	0	0	0	0	0	72.3404	N/A	RB1_Y790*	-
SJRB018827_G1	FALSE	47.22	5.54143	Male	White	Retinoblastoma	none	FALSE	0	0	0	0	0	0	0	0	0	N/A	-	-
SJRB019816_G1	FALSE	37.75	0.543873	Male	White	Retinoblastoma	none	FALSE	736.02	13484.4	0	0	0	0	0	0	53.125	N/A	-	-
SJNPC042727_G1	FALSE	47.56	8.37158	Male	Black	Nasopharyngeal carcinoma	none	FALSE	245.18	7797.03	0	0	0	0	0	0	0	N/A	-	-
SJLM043135_G1	FALSE	43.49	0.234973	Female	Black	Liver malignancies	none	FALSE	101.42	0	0	0	0	5	0	0	5	N/A	-	-
SJHL019256_G1	FALSE	64.63	22.5986	Female	White	Hodgkin lymphoma	none	FALSE	1714.66	0	0	0	0	0	0	0	0	FALSE	-	-
SJHL041534_G1	FALSE	58.35	22.7186	Female	White	Hodgkin lymphoma	none	FALSE	2408.18	0	0	0	0	0	0	0	0	FALSE	-	-
SJRB019817_G1	FALSE	37.63	0.530055	Female	White	Retinoblastoma	none	FALSE	0	12884.2	0	0	0	0	0	0	44.7368	N/A	-	-
SJGCT019220_G1	FALSE	58.74	16.7842	Female	White	Germ cell tumor	none	TRUE	1545.9	0	0	0	0	0	0	0	0	N/A	-	-
SJRB017936_G1	FALSE	37.3	0.180328	Male	White	Retinoblastoma	none	FALSE	788.66	13157.9	0	0	0	0	0	0	50	N/A	RB1_R552*	-
SJLM019365_G1	FALSE	40.34	1.02468	Male	White	Liver malignancies	none	FALSE	0	0	0	0	0	0	0	0	54.3478	N/A	-	-
SJRB018828_G1	FALSE	43.36	2.0137	Male	Black	Retinoblastoma	none	TRUE	763.52	4362.5	0	0	0	0	0	0	20.8333	N/A	RB1_R552*	-
SJRB019818_G1	FALSE	38.44	1.59178	Male	White	Retinoblastoma	none	FALSE	0	13775.5	0	0	0	0	0	0	44.898	N/A	-	-
SJGCT018626_G1	FALSE	39.51	1.35342	Female	Black	Germ cell tumor	none	TRUE	472.74	17890.5	0	0	0	21.4286	0	0	85.7143	N/A	-	-
SJHL041538_G1	FALSE	49.61	14.4247	Female	White	Hodgkin lymphoma	none	TRUE	3299.42	16486.8	0	0	0	0	0	0	76.5978	TRUE	-	-
SJRB019559_G1	FALSE	42.08	2.84932	Female	White	Retinoblastoma	none	FALSE	0	0	0	0	0	0	0	0	0	N/A	-	-
SJNPC041585_G1	FALSE	51.63	14.7644	Male	Black	Nasopharyngeal carcinoma	none	FALSE	823.08	8033.33	0	0	0	0	0	0	0	N/A	-	-
SJRB019819_G1	FALSE	37.74	1.92157	Female	White	Retinoblastoma	none	TRUE	0	7475	0	0	0	0	0	0	29.1667	N/A	RB1_R358*	-
SJNBL019386_G1	FALSE	43.48	4.86301	Male	White	Neuroblastoma	none	TRUE	0	0	0	0	0	0	0	0	0	N/A	-	-
SJRB041649_G1	FALSE	37.7	2.11353	Male	White	Retinoblastoma	none	FALSE	0	13588.9	0	0	0	0	0	0	48.1481	N/A	-	-
SJMEL042863_G1	FALSE	53.09	12.1452	Male	White	Melanoma	none	FALSE	0	0	0	0	0	0	0	0	0	N/A	-	-
SJLM019798_G1	FALSE	39.84	3.73151	Male	White	Liver malignancies	none	FALSE	0	0	0	0	0	0	0	0	0	N/A	-	-
SJRB019560_G1	FALSE	41.69	3.60822	Female	Black	Retinoblastoma	none	FALSE	0	13401.9	0	0	0	0	0	0	37.037	N/A	RB1_R358*	-
SJRB019561_G1	FALSE	40.46	2.34521	Female	Black	Retinoblastoma	none	FALSE	708.52	11826.8	0	0	0	0	0	0	51.7857	N/A	RB1_L218*	-
SJRB019820_G1	FALSE	35.85	1.66301	Male	Black	Retinoblastoma	none	TRUE	0	0	0	0	0	0	0	0	0	N/A	-	-
SJWLM019642_G1	FALSE	47.08	4.71118	Female	White	Wilms tumor	none	FALSE	991.98	0	0	0	0	10	0	0	54.4444	N/A	-	-
SJGCT041512_G1	FALSE	43.27	7.92056	Female	White	Germ cell tumor	none	TRUE	0	8630.95	0	0	0	9.52381	0	0	27.381	N/A	-	-
SJNHL019447_G1	FALSE	41.45	4.04645	Female	White	Non-Hodgkin lymphoma	none	TRUE	0	7740.16	0	439.754	0	0	0	282.461	50.4895	N/A	-	-
SJRB018829_G1	FALSE	44.58	6.88442	Female	White	Retinoblastoma	none	FALSE	0	0	0	0	0	0	0	0	0	N/A	-	-
SJNPC041586_G1	FALSE	47.37	12.7628	Male	White	Nasopharyngeal carcinoma	none	FALSE	1763.22	2393.94	0	0	0	0	0	4829.77	0	N/A	-	-
SJRB019821_G1	FALSE	36.98	4	Female	Black	Retinoblastoma	none	FALSE	0	0	0	0	0	0	0	0	0	N/A	-	-
SJSTS041691_G1	FALSE	45.03	8.34795	Male	White	Soft tissue sarcoma	none	FALSE	0	0	0	0	0	0	0	0	0	N/A	-	-
SJRB019822_G1	FALSE	37.28	3.85766	Male	Black	Retinoblastoma	none	FALSE	0	12380	0	0	0	0	0	0	61.6667	N/A	-	-
SJRB042760_G1	FALSE	36.97	1.88821	Male	Black	Retinoblastoma	none	FALSE	0	3305	0	0	0	0	0	0	6.66667	N/A	-	-
SJNBL042060_G1	FALSE	43.32	0.0876712	Female	White	Neuroblastoma	none	FALSE	855.84	0	0	0	0	0	0	0	0	N/A	-	-
SJGCT019772_G1	FALSE	46.25	12.1561	Female	White	Germ cell tumor	none	FALSE	1419.98	5370.27	0	0	0	6.30631	0	0	38.7387	N/A	-	-
SJNBL019393_G1	FALSE	36.56	0.0163934	Female	White	Neuroblastoma	none	FALSE	0	10748.1	0	372.727	0	0	0	0		N/A	-	-
SJRB017938_G1	FALSE	37.57	2.54795	Female	Black	Retinoblastoma	none	FALSE	0	15741.8	0	0	0	0	0	0	56.3636	N/A	-	-
SJGCT041513_G1	FALSE	35.24	1.68223	Male	White	Germ cell tumor	none	FALSE	0	0	0	0	0	0	0	0	0	N/A	-	-
SJRB041652_G1	FALSE	33.36	1.26179	Male	White	Retinoblastoma	none	TRUE	0	13000	0	0	0	0	0	0	50	N/A	BRCA1_L63*	BRCA1_L63*
SJRB019823_G1	FALSE	37.64	5.80339	Female	White	Retinoblastoma	none	FALSE	459.62	15060.2	0	0	0	0	0	0	53.012	N/A	-	-
SJRCC019114_G1	FALSE	44.47	10.1534	Male	Black	Other carcinoma	none	FALSE	0	0	0	0	0	0	0	0	0	N/A	-	-
SJSTS019603_G1	FALSE	61.49	20.9016	Male	White	Soft tissue sarcoma	none	FALSE	0	0	0	0	0	0	0	0	0	N/A	-	-
SJRB019562_G1	FALSE	38.51	1.89406	Female	White	Retinoblastoma	none	FALSE	0	0	0	0	0	0	0	0	0	N/A	-	-
SJHL019780_G1	FALSE	41.23	7.27671	Male	White	Hodgkin lymphoma	none	TRUE	0	16084.2	0	357.895	0	0	0	0	47.4737	FALSE	-	-
SJRB019563_G1	FALSE	38.51	2.61096	Female	Black	Retinoblastoma	none	FALSE	0	0	0	0	0	0	0	0	0	N/A	-	-
SJGCT041514_G1	FALSE	33.39	0.336986	Male	White	Germ cell tumor	none	FALSE	0	0	0	0	0	0	0	0	0	N/A	-	-
SJHL019275_G1	FALSE	56.01	21.2137	Female	White	Hodgkin lymphoma	none	FALSE	1970.78	15300	0	0	0	0	0	0	30.6667	TRUE	-	-
SJRB019824_G1	FALSE	34.49	2.9863	Female	White	Retinoblastoma	none	FALSE	0	0	0	0	0	0	0	0	0	N/A	-	-
SJRB041653_G1	FALSE	31.92	1.2411	Female	White	Retinoblastoma	none	FALSE	818.52	14278.8	0	0	0	0	0	0	50	N/A	RB1_Q444_E13splice	-
SJWLM018888_G1	FALSE	36.79	1.72603	Female	White	Wilms tumor	none	FALSE	0	0	0	178.947	0	7.01754	0	0	36.8421	N/A	-	-
SJRB041654_G1	FALSE	33.11	2.6411	Male	Black	Retinoblastoma	none	FALSE	0	0	0	0	0	0	0	0	0	N/A	-	-
SJWLM041700_G1	FALSE	37.14	1.0411	Male	White	Wilms tumor	none	FALSE	437.3	0	0	0	0	17.5163	0	0	45.3595	N/A	-	-
SJGCT041515_G1	FALSE	38.8	9.15068	Female	White	Germ cell tumor	none	FALSE	1625.36	12519.1	0	0	0	14.5038	0	0	16.7939	N/A	-	-
SJRB041655_G1	FALSE	30.68	0.139726	Female	White	Retinoblastoma	none	FALSE	0	0	0	0	0	0	0	0	0	N/A	-	-
SJCNS019124_G1	FALSE	43.27	5.31781	Female	White	Central nervous system (CNS)	none	TRUE	2707.06	16152.8	0	0	0	0	0	0	17.8218	N/A	-	-
SJNPC041587_G1	FALSE	44.37	15.0628	Female	White	Nasopharyngeal carcinoma	none	FALSE	2062.68	4832.65	0	0	0	0	0	6175.16	0	N/A	-	-
SJRB041656_G1	FALSE	32.91	1.49298	Female	White	Retinoblastoma	none	FALSE	0	0	0	0	0	0	0	0	0	N/A	-	-
SJGCT018627_G1	FALSE	49.07	16.5094	Male	White	Germ cell tumor	none	FALSE	0	0	574.444	0	206.667	0	0	0	120	N/A	-	-
SJRB041657_G1	FALSE	29.95	0.0300546	Male	White	Retinoblastoma	none	FALSE	664.76	0	0	0	0	0	0	0	0	N/A	-	-
SJLM017912_G1	FALSE	41.31	7.47814	Female	White	Liver malignancies	none	FALSE	0	0	0	0	0	0	0	0	0	N/A	-	-
SJGCT018628_G1	FALSE	35.81	3.39344	Female	Black	Germ cell tumor	none	TRUE	0	4487.18	0	0	0	5.95238	0	0	5.95238	N/A	-	-
SJRB019826_G1	FALSE	31.4	1.5528	Female	Black	Retinoblastoma	none	FALSE	0	15229.3	0	0	0	0	0	0	53.4483	N/A	-	-
SJMEL041583_G1	FALSE	48.68	17.9119	Female	White	Melanoma	none	FALSE	0	0	0	0	0	0	0	0	0	N/A	-	-
SJNBL018739_G2	FALSE	33.24	1.29279	Male	White	Neuroblastoma	none	FALSE	0	4458.82	451.923	160.588	0	0	500	0	0	N/A	-	-
SJGCT041516_G1	FALSE	43.69	14.3384	Female	Black	Germ cell tumor	none	FALSE	0	12684.6	0	0	0	16.1074	0	0	16.1074	N/A	-	-
SJRB041658_G1	FALSE	30.26	0.237705	Female	White	Retinoblastoma	none	FALSE	582.16	0	0	0	0	0	0	0	0	N/A	RB1_E237*	-
SJRB019564_G1	FALSE	38.24	4.25683	Male	White	Retinoblastoma	none	FALSE	0	0	0	0	0	0	0	0	0	N/A	-	-
SJRB041659_G1	FALSE	33.19	4.02732	Female	Black	Retinoblastoma	none	FALSE	0	0	0	0	0	0	0	0	0	N/A	-	-
SJLM019364_G1	FALSE	40.37	6.57295	Male	White	Liver malignancies	none	FALSE	0	11375.6	0	309.756	0	13.75	0	0	67.5	N/A	-	-
SJRB019827_G1	FALSE	29.63	0.551913	Male	White	Retinoblastoma	none	FALSE	0	0	0	0	0	0	0	0	0	N/A	-	-
SJNBL019406_G1	FALSE	30.94	0.420922	Female	White	Neuroblastoma	none	FALSE	0	5250	0	140	0	0	0	0	0	N/A	-	-
SJEWS019202_G1	FALSE	53.79	21.1453	Male	White	Ewing sarcoma family of tumors	none	FALSE	179.38	13046	0	394.872	0	5.02513	0	0	11.0553	N/A	-	-
SJSTS019607_G1	FALSE	45.59	13.3945	Female	Black	Soft tissue sarcoma	none	TRUE	0	6000	0	450	0	0	0	50000	0	N/A	-	BRCA1_G275fs
SJWLM019656_G1	FALSE	39.74	2.07706	Female	White	Wilms tumor	none	FALSE	197.02	0	0	0	0	6.25	0	0	165.321	N/A	-	-
SJGCT019221_G1	FALSE	46.87	15.6822	Female	Black	Germ cell tumor	none	FALSE	0	7567.57	0	0	0	8.10811	0	0	6.75676	N/A	-	-
SJGCT019222_G1	FALSE	45.74	13.937	Female	White	Germ cell tumor	none	FALSE	2201.04	0	0	0	0	0	0	0	0	N/A	-	-
SJRB019565_G1	FALSE	32.58	0.692312	Male	White	Retinoblastoma	none	FALSE	0	7685.11	0	0	0	0	0	0	2.12766	N/A	RB1_R320*	-
SJRB041660_G1	FALSE	30.51	2.10411	Male	White	Retinoblastoma	none	FALSE	0	5894.74	0	0	0	0	0	0	19.2982	N/A	-	-
SJRB019828_G1	FALSE	28.25	0.0575342	Female	White	Retinoblastoma	none	FALSE	1036.46	0	0	0	0	0	0	0	0	N/A	RB1_V368fs	-
SJRB041661_G1	FALSE	29.22	0.252055	Female	Black	Retinoblastoma	none	FALSE	0	0	0	0	0	0	0	0	0	N/A	-	-
SJGCT041517_G1	FALSE	27.75	0.819178	Female	White	Germ cell tumor	none	FALSE	1466.36	4200	719.565	0	269.565	6.52174	0	0	56.5217	N/A	-	-
SJRB041662_G1	FALSE	29.22	0.928767	Female	White	Retinoblastoma	none	FALSE	461.02	2586.79	0	0	0	0	0	0	13.2075	N/A	RB1_R320*	-
SJGICT018824_G1	FALSE	50.69	18.3644	Male	White	Other malignancy	none	FALSE	0	0	0	0	0	0	0	0	0	N/A	-	-
SJWLM017959_G1	FALSE	30.86	1.05745	Female	White	Wilms tumor	none	FALSE	310.18	0	0	175.51	0	6.12245	0	0	34.6939	N/A	-	-
SJNHL041023_G1	FALSE	36.76	3.87397	Male	Other	Non-Hodgkin lymphoma	none	FALSE	0	7085.71	0	196.825	0	0	0	4120.63	7.93651	N/A	-	-
SJNPC019800_G1	FALSE	43.18	15.5315	Female	White	Nasopharyngeal carcinoma	none	FALSE	837.48	0	0	0	0	0	0	0	0	N/A	-	-
SJRB041663_G1	FALSE	28.79	1.30411	Female	White	Retinoblastoma	none	FALSE	0	0	0	0	0	0	0	0	0	N/A	RB1_Copy loss	-
SJGCT019223_G1	FALSE	30.86	1.33973	Male	White	Germ cell tumor	none	FALSE	0	0	0	0	0	0	0	0	0	N/A	-	-
SJLM019366_G1	FALSE	31.95	2.89863	Male	White	Liver malignancies	none	FALSE	0	0	0	0	0	0	0	0	0	N/A	-	-
SJHL019296_G1	FALSE	52.11	19.9479	Male	White	Hodgkin lymphoma	none	TRUE	2096.82	0	0	0	0	0	0	0	0	FALSE	-	-
SJAML041899_G1	FALSE	33.17	4.59452	Female	Other	Acute myeloid leukemia	none	FALSE	442.12	0	0	248.499	0	0	2276.47	160.656	0	N/A	-	-
SJLM019367_G1	FALSE	31	2.04596	Female	White	Liver malignancies	none	FALSE	0	0	445.098	0	0	0	0	0	6	N/A	-	-
SJRCC019115_G1	FALSE	38.49	8.49863	Male	Black	Other carcinoma	none	FALSE	0	0	0	0	0	0	0	0	0	N/A	-	-
SJGCT018629_G1	FALSE	30.25	0.654795	Male	White	Germ cell tumor	none	FALSE	0	10271.7	177.778	0	59.2593	24.4898	0	0	35.6009	N/A	-	-
SJALL019005_G1	FALSE	34.71	5.31507	Female	White	Acute lymphoblastic leukemia	none	FALSE	1576.56	8629.09	0	186.905	0	0	7569.81	2856.73	36.0577	N/A	-	-
SJNPC019801_G1	FALSE	37.27	9.23014	Male	Black	Nasopharyngeal carcinoma	none	FALSE	961.48	0	540	0	90	0	0	0	36	N/A	-	-
SJRB019829_G1	FALSE	28.75	0.887671	Male	White	Retinoblastoma	none	FALSE	0	4561.4	0	0	0	0	0	0	21.0526	N/A	-	-
SJRB019566_G1	FALSE	32.23	2.15068	Male	White	Retinoblastoma	none	FALSE	0	4721.31	0	0	0	0	0	0	22.9508	N/A	RB1_L819fs	-
SJRB041664_G1	FALSE	26.74	0.112329	Male	Black	Retinoblastoma	none	FALSE	0	0	0	0	0	0	0	0	0	N/A	-	-
SJRB041665_G1	FALSE	31.06	4.40822	Female	White	Retinoblastoma	none	FALSE	0	0	0	0	0	0	0	0	0	N/A	-	BLM_Q700*
SJRB041666_G1	FALSE	26.49	0.539726	Female	White	Retinoblastoma	none	FALSE	0	0	0	0	0	0	0	0	0	N/A	-	-
SJNPC019502_G1	FALSE	41.08	13.3342	Female	Black	Nasopharyngeal carcinoma	none	FALSE	634.58	0	555.556	0	87.5	0	0	0	37.5	N/A	-	-
SJGCT042849_G1	FALSE	41.82	10.3531	Female	White	Germ cell tumor	none	FALSE	0	3973.08	461.538	177.692	0	0	0	0	0	N/A	-	-
SJGCT041519_G1	FALSE	43.17	15.8607	Female	Black	Germ cell tumor	none	FALSE	0	1082.47	0	0	0	2.06186	0	0	2.06186	N/A	-	-
SJGCT019224_G1	FALSE	38.67	11.1238	Female	White	Germ cell tumor	none	FALSE	0	14520.8	0	0	0	20.8	0	0	20.8	N/A	-	-
SJGCT042716_G1	FALSE	27.9	0.0931507	Female	White	Germ cell tumor	none	FALSE	0	4226.42	360.377	0	122.642	0	0	0	28.3019	N/A	-	-
SJLM019368_G1	FALSE	30.22	2.68767	Male	Black	Liver malignancies	none	FALSE	0	0	607.143	0	0	0	0	0	9.43396	N/A	-	-
SJALL018480_G1	FALSE	28.71	1.29315	Female	White	Acute lymphoblastic leukemia	none	TRUE	516.02	8133.33	0	72.7273	0	0	13077.8	4118.18	51.9481	N/A	-	-
SJLM019369_G1	FALSE	27.71	0.672663	Male	White	Liver malignancies	none	FALSE	0	0	313.889	0	0	0	0	0	2.77778	N/A	-	-
SJWLM019668_G1	FALSE	32.98	5.9863	Male	White	Wilms tumor	none	FALSE	407.78	0	0	149.333	0	6.66667	0	0	33.3333	N/A	-	-
SJGCT042717_G1	FALSE	33.68	7.3863	Female	Black	Germ cell tumor	none	FALSE	1459.96	0	0	0	0	0	0	0	0	N/A	-	-
SJGCT018631_G1	FALSE	27.46	0.536417	Male	White	Germ cell tumor	none	TRUE	0	12106.8	180.435	0	60.8696	16.2791	0	0	29.3225	N/A	-	-
SJGCT019773_G1	FALSE	25.56	0.00273973	Female	Black	Germ cell tumor	none	FALSE	0	0	0	0	0	0	0	0	0	N/A	-	-
SJGCT018632_G1	FALSE	31.59	2.55616	Male	White	Germ cell tumor	none	FALSE	252.92	10500	918.333	0	183.333	15	0	0	76.6667	N/A	-	POLG_A467T
SJCNS019125_G1	FALSE	39.56	4.89863	Female	White	Central nervous system (CNS)	none	FALSE	1002.12	0	0	0	0	0	0	0	0	N/A	-	-
SJMEL019376_G1	FALSE	30.05	2.59452	Male	White	Melanoma	none	FALSE	0	0	0	0	0	0	0	0	0	N/A	-	-
SJMEL017913_G1	FALSE	34.39	3.54247	Female	White	Melanoma	none	FALSE	0	14043.2	0	0	0	19.7531	0	0	19.7531	N/A	-	-
SJCNS041476_G1	FALSE	29.1	4.93425	Female	White	Central nervous system (CNS)	none	FALSE	897.12	0	0	0	0	0	0	0	0	N/A	BRCA1_V1234_N1235fs	BRCA1_V1234_N1235fs
SJALL041353_G1	FALSE	35.34	11.5863	Female	White	Acute lymphoblastic leukemia	none	FALSE	0	9997.92	0	24.8299	0	0	12933.6	4065.31	71.4286	N/A	-	-
SJRB041669_G1	FALSE	24.1	0.849315	Female	White	Retinoblastoma	none	FALSE	128.27	0	0	0	0	0	0	0	0	N/A	-	-
SJCNS019130_G1	FALSE	36.44	8.57534	Female	White	Central nervous system (CNS)	none	FALSE	684.34	0	0	0	0	0	0	0	0	N/A	-	-
SJGCT041520_G1	FALSE	33.73	9.33425	Female	White	Germ cell tumor	none	FALSE	0	0	0	0	0	0	0	0	0	N/A	PTEN_L265fs	-
SJGCT019774_G1	FALSE	40.59	16.3425	Female	Black	Germ cell tumor	none	FALSE	0	13039.2	0	0	0	15.6863	0	0	15.6863	N/A	-	-
SJHL018675_G1	FALSE	36.65	9.71781	Male	White	Hodgkin lymphoma	none	FALSE	1061.18	5000	0	101.087	39.1304	0	0	0	30.4348	TRUE	-	-
SJCNS042704_G1	FALSE	37.88	13.074	Male	White	Central nervous system (CNS)	none	FALSE	2969.82	0	0	0	0	0	0	0	0	N/A	-	BLM_Y974fs
SJSTS019837_G1	FALSE	33.55	9.5726	Female	Black	Soft tissue sarcoma	none	FALSE	2944.64	19452.5	0	306.557	0	21.875	0	0	40.1639	N/A	-	-
SJGCT018633_G1	FALSE	37.43	11.1458	Female	White	Germ cell tumor	none	FALSE	0	12682.9	0	0	0	17.8862	0	0	17.8862	N/A	-	-
SJCA019116_G1	FALSE	38.9	13.2849	Male	White	Other carcinoma	none	FALSE	2267.98	0	594.815	0	0	0	0	713.333	0	N/A	-	-
SJNPC019503_G1	FALSE	37.7	13.2137	Female	Black	Nasopharyngeal carcinoma	none	FALSE	926.68	0	449.758	0	0	0	0	539.614	0	N/A	-	-
SJGCT041522_G1	FALSE	25.67	2.08219	Male	White	Germ cell tumor	none	FALSE	0	0	0	0	0	0	0	0	0	N/A	-	-
SJCNS041478_G1	FALSE	34.94	12.0219	Male	White	Central nervous system (CNS)	none	FALSE	735.14	0	0	0	0	0	0	0	0	N/A	-	-
SJSTS019611_G1	FALSE	40.48	13.6877	Female	White	Soft tissue sarcoma	none	TRUE	0	13458.3	0	358.889	0	15	0	0	20	N/A	-	-
SJACT019754_G1	FALSE	33.71	10.2192	Female	White	Other carcinoma	none	FALSE	0	0	0	0	0	0	0	0	0	N/A	-	POLG_A467T
SJALL041382_G1	FALSE	27.43	2.45806	Female	White	Acute lymphoblastic leukemia	none	FALSE	0	9197.65	0	0	0	0	16459.4	4133.89	97.6979	N/A	-	-
SJGCT019225_G1	FALSE	36.27	9.80244	Female	Black	Germ cell tumor	none	TRUE	0	4015.09	449.074	0	149.074	5.71429	0	0	35.3439	N/A	-	-
SJSTS019612_G1	FALSE	41.11	15.7596	Male	White	Soft tissue sarcoma	none	FALSE	0	0	0	0	0	0	0	0	0	N/A	-	-
SJGCT018634_G1	FALSE	26.21	0.289939	Male	White	Germ cell tumor	none	FALSE	0	4421.05	375.61	0	0	5.26316	982.927	0	5.26316	N/A	-	-
SJOS042757_G1	FALSE	47.49	23.541	Male	White	Osteosarcoma	none	FALSE	0	9935.89	300	390.055	0	0	0	108756	0	N/A	-	-
SJRB017940_G1	FALSE	25.28	0.188525	Female	White	Retinoblastoma	none	FALSE	0	0	0	0	0	0	0	0	0	N/A	RB1_D511fs	-
SJSTS019613_G1	FALSE	37.34	11.3005	Male	White	Soft tissue sarcoma	none	FALSE	0	0	0	0	0	0	0	0	0	N/A	-	-
SJGCT019226_G1	FALSE	34.5	11.0044	Female	White	Germ cell tumor	none	FALSE	0	11253.7	0	0	0	17.0543	0	0	17.0543	N/A	-	-
SJSTS019614_G1	FALSE	36.04	12.5498	Female	White	Soft tissue sarcoma	none	FALSE	0	0	0	0	0	0	0	0	0	N/A	-	-
SJCNS019138_G1	FALSE	33.04	9.77432	Male	White	Central nervous system (CNS)	none	FALSE	3066.22	0	385	0	0	0	1259.17	0	0	N/A	-	ERCC2_R616P
SJNPC019504_G1	FALSE	37.26	13.5796	Female	White	Nasopharyngeal carcinoma	none	FALSE	840.28	0	247.541	0	0	0	0	240.164	0	N/A	-	NBN_Y197fs
SJRB019567_G1	FALSE	24.97	0.139344	Female	White	Retinoblastoma	none	FALSE	0	0	0	0	0	0	0	0	0	N/A	RB1_R320*	-
SJCA018563_G1	FALSE	41.65	16.3115	Male	White	Other carcinoma	none	FALSE	0	0	355.782	278.231	0	0	0	0	0	N/A	-	-
SJRB042853_G1	FALSE	28.33	1.32163	Male	Black	Retinoblastoma	none	FALSE	0	2058.82	0	70.5882	0	0	0	0	0	N/A	RB1_P27fs	-
SJSTS018854_G1	FALSE	37.95	12.6915	Male	White	Soft tissue sarcoma	none	FALSE	0	0	0	0	0	0	0	0	0	N/A	-	-
SJSTS019615_G1	FALSE	32.89	8.48913	Female	Black	Soft tissue sarcoma	none	FALSE	0	0	0	0	0	0	0	0	0	N/A	-	-
SJRB041670_G1	FALSE	22.78	2.33425	Male	White	Retinoblastoma	none	FALSE	0	0	0	0	0	0	0	0	0	N/A	-	-
SJSTS019616_G1	FALSE	41.13	15.8548	Male	Black	Soft tissue sarcoma	none	FALSE	0	12151.7	0	362.416	0	12.5828	0	0	21.4765	N/A	-	-
SJSTS018855_G1	FALSE	35.22	12.2658	Male	White	Soft tissue sarcoma	none	TRUE	0	0	0	0	0	0	0	0	0	N/A	-	-
SJSTS018856_G1	FALSE	39.74	14.9151	Male	White	Soft tissue sarcoma	none	FALSE	0	0	0	0	0	0	0	0	0	N/A	-	-
SJWLM019682_G1	FALSE	30.73	3.78904	Male	White	Wilms tumor	none	FALSE	0	0	0	0	0	16.129	0	0	41.9355	N/A	-	-
SJRB041671_G1	FALSE	24.07	3.30137	Male	White	Retinoblastoma	none	FALSE	0	0	0	0	0	0	0	0	0	N/A	-	-
SJSTS019617_G1	FALSE	38.95	14.7041	Male	Unknown	Soft tissue sarcoma	none	TRUE	0	0	0	0	0	0	0	0	0	N/A	-	-
SJCNS019144_G1	FALSE	27.68	4.12877	Male	White	Central nervous system (CNS)	none	FALSE	2753.16	0	0	0	0	0	0	0	0	N/A	-	-
SJSTS019618_G1	FALSE	35.3	11.537	Female	White	Soft tissue sarcoma	none	FALSE	0	19459.7	0	118.75	0	0	2560.9	0	16.25	N/A	-	-
SJRB019568_G1	FALSE	30.07	6.40548	Female	White	Retinoblastoma	none	FALSE	0	0	0	0	0	0	0	0	0	N/A	-	-
SJGCT018635_G1	FALSE	41.56	18.8685	Female	White	Germ cell tumor	none	FALSE	0	0	407.143	0	61.4286	0	1896.43	0	0	N/A	-	-
SJNHL018789_G1	FALSE	32.9	3.44809	Male	White	Non-Hodgkin lymphoma	none	FALSE	0	17188.4	0	0	0	0	0	5665.62	49.2754	N/A	-	-
SJGCT018636_G1	FALSE	23.85	1.89378	Male	White	Germ cell tumor	none	FALSE	0	0	0	0	0	0	0	0	0	N/A	-	-
SJCNS019148_G1	FALSE	34.03	9.29589	Male	White	Central nervous system (CNS)	none	FALSE	938.34	0	0	0	0	0	0	0	0	N/A	-	-
SJSTS019619_G1	FALSE	33.38	12.0356	Male	White	Soft tissue sarcoma	none	FALSE	279.92	0	0	0	0	0	0	0	0	N/A	-	-
SJSTS017950_G1	FALSE	31.12	9.69799	Female	White	Soft tissue sarcoma	none	FALSE	1348.88	0	0	0	0	0	0	0	0	N/A	-	POLG_A467T
SJRB041672_G1	FALSE	21.77	2.52879	Male	White	Retinoblastoma	none	FALSE	0	0	0	0	0	0	0	0	0	N/A	-	-
SJGCT041523_G1	FALSE	33.1	12.4164	Female	White	Germ cell tumor	none	FALSE	0	0	409.375	0	61.7188	0	2042.97	0	0	N/A	-	-
SJGCT018637_G1	FALSE	33.8	10.2856	Female	Black	Germ cell tumor	none	TRUE	0	0	856.41	0	61.5385	0	2141.03	0	0	N/A	-	-
SJRB019830_G1	FALSE	21	1.66273	Male	Black	Retinoblastoma	none	FALSE	0	0	0	0	0	0	0	0	0	N/A	-	-
SJSTS018858_G1	FALSE	30.02	8.00548	Male	White	Soft tissue sarcoma	none	TRUE	1235.88	0	0	0	0	0	0	0	0	N/A	-	-
SJNPC019505_G1	FALSE	40.31	17.5589	Female	White	Nasopharyngeal carcinoma	none	FALSE	372.48	0	342.268	0	0	0	0	468.557	0	N/A	-	-
SJCNS019759_G1	FALSE	26.78	6.50198	Female	White	Central nervous system (CNS)	none	FALSE	984.62	0	0	0	0	0	0	0	0	N/A	-	-
SJCNS018576_G1	FALSE	25.09	2.12809	Male	White	Central nervous system (CNS)	none	TRUE	21.02	0	0	0	0	0	0	0	0	N/A	-	-
SJSTS018859_G1	FALSE	32.92	9.96986	Male	White	Soft tissue sarcoma	none	FALSE	1382.72	3700.72	0	119.424	0	1.43885	0	0	7.19424	N/A	-	-
SJOS019541_G1	FALSE	44.57	23.5562	Male	White	Osteosarcoma	none	FALSE	0	9682.56	385.714	379.524	0	0	0	104648	0	N/A	-	-
SJGCT019228_G1	FALSE	35.53	14.3748	Female	White	Germ cell tumor	none	FALSE	0	0	407.692	0	60.8974	0	2038.46	0	0	N/A	PALB2_F1016fs	-
SJGCT019229_G1	FALSE	30.39	9.79178	Female	White	Germ cell tumor	none	FALSE	0	0	405.455	0	61.8182	0	2031.82	0	0	N/A	-	-
SJCA019117_G1	FALSE	37.01	15.3398	Female	Black	Other carcinoma	none	FALSE	0	7447.89	3684.4	0	0	0	1521.28	0	0	N/A	-	-
SJEWS018620_G1	FALSE	29.35	8.20822	Male	White	Ewing sarcoma family of tumors	none	FALSE	1007.52	20161.8	0	310.577	0	7.47664	3024.51	0	10.2804	N/A	-	-
SJSTS018860_G1	FALSE	40.23	17.8521	Female	Black	Soft tissue sarcoma	none	FALSE	0	9575.82	2771.15	365.839	0	0	0	106595	0	N/A	-	-
SJEWS019771_G1	FALSE	37.42	18.4247	Female	White	Ewing sarcoma family of tumors	none	FALSE	1427.96	15322.4	0	317.083	0	3.2	2453.78	0	13.6	N/A	-	-
SJSTS018861_G1	FALSE	34.73	12.5808	Female	White	Soft tissue sarcoma	none	TRUE	732.46	9704.54	2803.99	225.294	0	0	0	84959.1	0	N/A	-	-
SJALL019056_G1	FALSE	31.14	2.9726	Female	White	Acute lymphoblastic leukemia	none	FALSE	110.76	7885.71	0	192.857	0	0	0	126.984	22.2222	N/A	-	-
SJST044166_G1	FALSE	39.99	16.0137	Male	Black	Other malignancy	none	FALSE	0	0	0	0	0	0	0	0	0	N/A	-	-
SJNPC019506_G1	FALSE	35.49	15.4344	Male	Black	Nasopharyngeal carcinoma	none	FALSE	346.68	0	401.212	0	0	0	0	481.818	0	N/A	-	-
SJEWS018621_G1	FALSE	30.18	7.95902	Male	White	Ewing sarcoma family of tumors	none	FALSE	1001.04	27180.2	0	364.286	0	6.45161	9569.39	0	27.551	N/A	-	-
SJCNS019761_G1	FALSE	27.57	9.41052	Male	Black	Central nervous system (CNS)	none	FALSE	0	0	0	0	0	0	0	0	0	N/A	-	-
SJLM019371_G1	FALSE	24.54	1.67671	Male	Black	Liver malignancies	none	FALSE	0	0	450	0	0	0	0	0		N/A	-	-
SJEWS019211_G1	FALSE	30.09	7.54645	Male	White	Ewing sarcoma family of tumors	none	FALSE	1001.04	28454	0	376.531	0	4.08163	4904.65	0	29.0698	N/A	-	-
SJSTS018862_G1	FALSE	27.47	5.54414	Female	White	Soft tissue sarcoma	none	TRUE	634.36	0	0	174.074	0	8.64198	0	0	40.7407	N/A	-	-
SJGCT019230_G1	FALSE	22.37	3.28373	Female	Black	Germ cell tumor	none	FALSE	820.8	8859.29	4317.56	0	0	0	1795.53	0	0	N/A	-	BLM_S1094*
SJNPC041588_G1	FALSE	33.48	14.6673	Female	Black	Nasopharyngeal carcinoma	none	FALSE	329.48	0	246.667	0	0	0	0	352.667	0	N/A	-	-
SJSTS019621_G1	FALSE	25.81	4.75515	Female	Black	Soft tissue sarcoma	none	FALSE	0	0	0	0	0	0	0	0	0	N/A	-	-
SJEWS018622_G1	FALSE	24.61	4.39891	Female	White	Ewing sarcoma family of tumors	none	FALSE	746.4	27530.5	0	401.639	0	1.5873	4678.69	0	26.2295	N/A	-	-
SJGCT019231_G1	FALSE	24.71	5.86139	Female	White	Germ cell tumor	none	FALSE	0	0	397.436	0	61.5385	0	1987.18	0	0	N/A	-	-
SJRB041673_G1	FALSE	24.3	7.05843	Male	White	Retinoblastoma	none	FALSE	0	0	0	0	0	0	0	0	0	N/A	-	-
SJSTS018863_G1	FALSE	36.05	6.08493	Female	White	Soft tissue sarcoma	none	TRUE	0	0	0	0	0	0	0	0	0	N/A	-	-
SJMEL042515_G1	FALSE	29.78	7.28546	Male	White	Melanoma	none	FALSE	0	6370	541.221	0	0	7.69231	1210.69	0	7.69231	N/A	-	-
SJSTS018864_G1	FALSE	34.8	15.3758	Female	White	Soft tissue sarcoma	none	FALSE	363.56	2200.04	0	60.119	0	0	0	0	3.57143	N/A	-	-
SJNPCA018728_G1	FALSE	36.91	17.7783	Male	Black	Nasopharyngeal carcinoma	none	TRUE	385.38	0	390.909	0	0	0	0	469.091	0	N/A	-	-
SJCNS019158_G1	FALSE	34.02	12.1749	Male	White	Central nervous system (CNS)	none	FALSE	2452.82	0	0	0	0	0	0	0	0	N/A	-	-
SJSTS019622_G1	FALSE	36.94	15.7644	Female	White	Soft tissue sarcoma	none	FALSE	1845.1	13346	0	363.975	0	0	0	0	7.45342	N/A	-	-
SJEWS041506_G1	FALSE	31.49	15.0027	Male	White	Ewing sarcoma family of tumors	none	TRUE	1422.6	23612.5	0	377.949	0	3.07692	3176.92	0	23.5897	N/A	-	-
SJGCT019233_G1	FALSE	35.95	15.3315	Male	White	Germ cell tumor	none	FALSE	0	0	787.013	0	58.8745	0	1967.53	0	0	N/A	-	-
SJGCT018639_G1	FALSE	40.71	20.063	Female	White	Germ cell tumor	none	TRUE	0	0	403.333	0	60.6667	0	2014	0	0	N/A	-	-
SJCA017893_G1	FALSE	32.42	13.6356	Male	White	Other carcinoma	none	FALSE	0	0	0	0	0	0	0	0	0	N/A	-	-
SJCNS018583_G1	FALSE	25.75	5.31781	Female	White	Central nervous system (CNS)	none	FALSE	0	0	0	0	0	0	0	0	0	N/A	-	-
SJSTS018866_G1	FALSE	38.03	18.6356	Female	Black	Soft tissue sarcoma	none	FALSE	323.96	12615.8	0	254.822	0	0	0	0	12.1827	N/A	-	-
SJST019552_G1	FALSE	36.5	17.5233	Male	White	Other malignancy	none	TRUE	2320.36	13785.3	0	281.967	0	0	0	0	18.5792	N/A	-	-
SJST019553_G1	FALSE	37.25	19.0904	Male	White	Other malignancy	none	FALSE	0	16212.2	1392.27	178.571	0	0	2853.36	0	8.79121	N/A	-	-
SJEWS018623_G1	FALSE	39.12	19.9726	Female	White	Ewing sarcoma family of tumors	none	FALSE	1914.24	19620.2	0	44.9438	0	1.1976	3424.72	0	8.98876	N/A	-	MRE11A_L57*
SJGCT042844_G1	FALSE	33.65	11.8137	Female	Black	Germ cell tumor	none	FALSE	0	0	0	0	0	0	0	0	0	N/A	-	-
SJSTS041693_G1	FALSE	29.27	11.5096	Male	White	Soft tissue sarcoma	none	FALSE	1657.04	0	0	0	0	0	0	0	0	N/A	-	-
SJSTS019623_G1	FALSE	23.37	5.08988	Female	White	Soft tissue sarcoma	none	FALSE	1548.96	14784.6	0	330.864	0	0	489.873	0	30.8642	N/A	-	-
SJCNS041489_G1	FALSE	27.58	10.811	Female	Black	Central nervous system (CNS)	none	FALSE	0	0	0	0	0	0	0	0	0	N/A	-	-
SJMEL019378_G1	FALSE	28.9	7.68306	Male	White	Melanoma	none	FALSE	0	7000	540	0	0	11	1200	0	11	N/A	-	-
SJST042112_G1	FALSE	32.45	11.1589	Female	White	Other malignancy	none	FALSE	2436.64	14487.5	0	368.041	0	2.85714	0	0	11.3402	N/A	-	-
SJMEL019799_G1	FALSE	26.28	11.2164	Female	White	Melanoma	none	FALSE	658.94	6404.6	330.409	0	0	6.93642	738.012	0	8.09249	N/A	-	-
SJEWS041012_G1	FALSE	29.47	10.0171	Female	White	Ewing sarcoma family of tumors	none	FALSE	0	9721.11	2523.26	365.625	0	0	0	116953	0	N/A	-	-
SJSTS019624_G1	FALSE	31.22	13.3971	Male	White	Soft tissue sarcoma	none	FALSE	684.04	0	0	0	0	0	0	0	0	N/A	-	-
SJGCT019234_G1	FALSE	34.6	17.2603	Male	White	Germ cell tumor	none	TRUE	0	0	425	0	200	0	2055.56	0	0	N/A	-	-
SJGCT042847_G1	FALSE	29.96	9.13973	Female	White	Germ cell tumor	none	FALSE	0	0	400	0	60	0	2000	0	0	N/A	-	-
SJSTS017949_G1	FALSE	24.45	7.53151	Male	Black	Soft tissue sarcoma	none	FALSE	49.34	0	0	0	0	0	0	0	0	N/A	-	-
SJEWS041507_G1	FALSE	29.58	15.1671	Male	White	Ewing sarcoma family of tumors	none	FALSE	0	27793.4	0	316.535	0	3.22581	4357.48	0	16.5354	N/A	-	-
SJCNS041491_G1	FALSE	27.93	12.2795	Female	White	Central nervous system (CNS)	none	FALSE	0	0	0	0	0	0	0	0	0	N/A	-	-
SJEWS018625_G1	FALSE	23.77	6.07123	Female	White	Ewing sarcoma family of tumors	none	TRUE	1012.96	25789.5	0	363.158	0	4.25532	4202.11	0	25.2632	N/A	-	-
SJEWS019214_G1	FALSE	32.17	13.874	Female	White	Ewing sarcoma family of tumors	none	FALSE	598.78	22780	0	261.364	0	3.0303	3443.94	0	25.7576	N/A	-	-
SJGCT041524_G1	FALSE	24.5	1.44533	Female	White	Germ cell tumor	none	FALSE	0	4826.09	200	380.435	0	6.52174	954.348	0	19.5652	N/A	-	-
SJCNS018590_G1	FALSE	39.71	21.0301	Male	White	Central nervous system (CNS)	autologous	FALSE	570.38	0	0	0	0	0	0	0	0	N/A	-	-
SJNPCA018729_G1	FALSE	32.22	16.4411	Male	White	Nasopharyngeal carcinoma	none	FALSE	968.78	0	385.714	0	0	0	0	462.733	0	N/A	-	-
SJGCT019235_G1	FALSE	34.96	18.0959	Male	White	Germ cell tumor	none	TRUE	0	0	783.77	0	58.6387	0	1958.12	0	0	N/A	-	-
SJGCT041525_G1	FALSE	32.79	16.874	Female	Black	Germ cell tumor	none	FALSE	0	0	402.247	0	44.9438	0	1915.17	0	0	N/A	-	-
SJCA019119_G1	FALSE	27.92	10.9436	Male	White	Other carcinoma	none	FALSE	0	0	0	0	0	0	0	0	0	N/A	-	-
SJEWS042614_G1	FALSE	29.1	9.7589	Male	White	Ewing sarcoma family of tumors	none	FALSE	0	25342.4	0	337.273	0	2.77778	3991.89	0	31.5315	N/A	-	-
SJEWS019215_G1	FALSE	33.9	15.7863	Male	White	Ewing sarcoma family of tumors	none	FALSE	1023.36	28465.8	0	353.061	0	1.02041	4046.94	0	19.3878	N/A	-	-
SJCNS019179_G1	FALSE	31.59	14.0245	Female	White	Central nervous system (CNS)	none	FALSE	571.14	0	0	0	0	0	0	0	0	N/A	-	-
SJGCT019236_G1	FALSE	24.08	8.11507	Female	Black	Germ cell tumor	none	FALSE	0	0	400	0	59.7938	0	2000	0	0	N/A	-	-
SJSTS018872_G1	FALSE	30.44	11.8822	Female	White	Soft tissue sarcoma	none	FALSE	302.78	12864.6	0	185.455	0	0	0	0	22.0339	N/A	-	-
SJEWS041984_G1	FALSE	31.44	13.2493	Female	White	Ewing sarcoma family of tumors	none	FALSE	1838.2	26998.9	0	205.128	0	0	3634.62	0	11.5385	N/A	-	-
SJSTS019625_G1	FALSE	24.63	8.07671	Female	White	Soft tissue sarcoma	none	FALSE	0	0	0	0	0	0	0	0	0	N/A	-	-
SJSTS019838_G1	FALSE	29.34	14.4493	Female	White	Soft tissue sarcoma	none	TRUE	1561.36	13006.9	0	265.359	0	0	0	0	10.4575	N/A	-	-
SJEWS019217_G1	FALSE	27.56	10.4984	Male	White	Ewing sarcoma family of tumors	none	FALSE	1001.04	30094.8	0	366.957	0	6.14035	4269.3	0	28.0702	N/A	-	-
SJEWS041510_G1	FALSE	33.63	21.3148	Female	White	Ewing sarcoma family of tumors	none	FALSE	246.6	25914.5	0	352.41	0	2.40964	3639.76	0	14.4578	N/A	-	-
SJCNS041495_G1	FALSE	23.03	8.57965	Male	White	Central nervous system (CNS)	none	FALSE	0	0	0	0	0	0	0	0	0	N/A	-	-
SJCNS018596_G1	FALSE	28.45	11.2591	Male	White	Central nervous system (CNS)	none	FALSE	773.24	0	0	0	0	0	0	0	0	N/A	-	-
SJMEL041584_G1	FALSE	34.73	19.9126	Male	White	Melanoma	none	FALSE	0	0	0	0	0	0	0	0	0	N/A	-	-
SJSTS017951_G1	FALSE	27.33	11.437	Female	White	Soft tissue sarcoma	none	FALSE	197.12	0	0	0	0	0	0	0	0	N/A	-	-
SJCNS018600_G1	FALSE	28.26	11.406	Female	White	Central nervous system (CNS)	none	FALSE	277.94	0	0	0	0	0	0	0	0	N/A	-	-
SJSTS041647_G1	FALSE	34.1	20.776	Male	White	Other malignancy	none	FALSE	0	0	0	0	0	0	0	0	0	N/A	-	-
[truncated: 1,185 more rows]

## Sheet: TableS9
Gene	AA change	Chr	Pos	REF	ALT	IsCustom	For Primer	Rev Primer	Ref Probe	Alt Probe
ASXL1	R404*	20	31021211	C	T	TRUE	AGAATCAGTGCGTATACAGC	ATTCCTTCTGGCTCTGGTTC	CA+G+C+GA+GA+TGG	CA+G+T+GA+G+A+TGG		Legend
ASXL1	L702fs	20	31022620	T	TG	TRUE	GTACGTCAGATCTACAGCGA	CTCTCCTAGCTCTGGACATG	TC+CTC+T+AA+A+T+GGG	TC+CTCT+G+AA+A+T+GG		Gene	Associated gene region for which alternate sequence was to be tested
ASXL1	E705*	20	31022628	G	T	TRUE	GTACGTCAGATCTACAGCGA	CTCTCCTAGCTCTGGACATG	TGC+T+C+CC+CAT	AT+GC+T+A+CC+C+ATT		AA change	Amino acid change
ASXL1	N57fs	20	30956844	A	GT	TRUE	TGTATAACCCTCATCCATTCTT	ATTCGGCCAGGCAGTTTATA	CCT+C+A+AT+G+C+TATGC	CCT+C+A+GTT+G+C+TAT		Chr	chromosome
ASXL1	G642fs	20	31022441	A	TG	TRUE	AGAGGTCACCACTGCCATA	CCACCTCCCTCATCGGT	CC+C+T+CC+G+A+TG	CCC+C+A+CCGA+TG		Pos	position
CBL	L380P	11	119148919	T	C	TRUE	TGAATTATACTGTGAGATGGGC	TCCACAGGGCTCAATCTTTA	ACA+T+A+GT+T+G+GA	ACA+T+G+GT+T+GG		REF	nucleotide(s) in the reference variant
CBL	R420Q	11	119149251	G	A	TRUE	TGCAGGAATCAGAAGGTCAG	GCTGCCACTCCCTCTAG	TGC+C+G+AT+GT+GA	TGC+C+A+AT+G+T+GA		ALT	nucleotide(s) in the alternate variant observed by NGS
CBL	C384Y	11	119148931	G	A	TRUE	GGGCTCCACATTCCAACTAT	GTCCACAGGGCTCAATCTT	ATA+T+G+TG+C+T+GAA	AA+TA+T+A+TG+C+T+G+AA		IsCustom	True if probes/primers are custome-designed. Othewise, purchased as a mix from Bio-Rad.
CBL	H398R	11	119148973	A	G	TRUE	AGGATGTAAAGATTGAGCCCT	TTTAGATCCGTACCTGCCAG	AG+G+T+GT+CC+ACA	AG+G+C+GT+CC+AC		For Primer	Sequence of the forward primer
DNMT3A	R882C	2	25457243	G	A	TRUE	GAAGAGGTGGCGGATGAC	CACTATACTGACGTCTCCAAC	AAG+C+G+GC+TCA	CAAG+C+A+GC+T+CA		Rev Primer	Sequence of the reverse primer
DNMT3A	W860R	2	25458595	A	G	TRUE	TCAGAACAGCCACACCG	CTCCATAAAGCAGGGCAAAG	CTT+A+T+GG+T+G+CAC	CTT+A+C+GG+TG+CAC		Ref Probe	Sequence of the hydrolysis probe identifying the reference variant nucleotide(s)
DNMT3A	R736H	2	25463286	C	T	TRUE	CGATCATCTCCCTCCTTGG	TTTCTCTTCCGACCTCTCAG	AC+C+G+CC+TCCT	AC+C+A+CC+TC+CT		Alt Probe	Sequence of the hydrolysis probe identifying the alternate variant nucleotide(s)
DNMT3A	P904L	2	25457176	G	A	TRUE	TTGTGTCGCTACCTCAGTTT	CAGTCATCCGCCACCTC	CT+C+C+GCT+G+AA	CT+C+T+GCT+GA+AGG		Probe '+N' base	Locked nucleic acid (LNA) containing probes were used in the custom assays. LNA base notation was +A, +G, +C, +T
DNMT3A	R598*	2	25467083	G	A	TRUE	CTCACAAATTCCTGGTCGTG	CTGGAACTGCTACATGTGC	CG+G+C+GAGA+GG	CG+G+T+GAG+AGGA
DNMT3A	R320*	2	25470516	G	A	TRUE	TTACCACTGAGAATTTGCCG	CATTGTGTCTTGGTGGATGA	TGCT+C+G+GC+TC	TGCT+C+A+GCT+CC
DNMT3A	R882H	2	25457242	C	T	TRUE	GAAGAGGTGGCGGATGAC	ACTATACTGACGTCTCCAACA	CAA+G+C+GGCT+CA	AA+G+T+GG+CT+CA
DNMT3A	I705T	2	25463568	A	G	TRUE	ATGGAGAGGTCATTGCAGG	TGCCTTTATCCTCCCAGATC	CC+CC+A+A+TC+A+CCA	CCC+A+G+TC+A+CCA
DNMT3A	R771*	2	25463182	G	A	TRUE	CATTAGTGAGCTGGCCAAAC	CTGGCTCTTTGAGAATGTGG	AT+CT+C+G+C+GATTTC	AT+CT+C+G+T+GAT+TTC
DNMT3A	V716I	2	25463536	C	T	TRUE	AGCTGAGAAGGTGGAGG	GGGCCCATTCGATCTGG	TT+G+A+C+GA+TG+GA	TTG+A+T+GA+T+G+GA
DNMT3A	R635W	2	25466800	G	A	TRUE	CTCACCTGTAGCGATTCCAT	CTCACTGCTTAGGACCCTC	CCAT+C+C+GGGTG	CC+AT+C+T+GGG+TG
DNMT3A	R749C	2	25463248	G	A	TRUE	CCACATTCTCAAAGAGCCAG	TTCTTTGAGTTCTACCGCCT	AGATGA+T+C+GC+CC	AGA+TGA+T+T+GC+CC
DNMT3A	S770L	2	25463184	G	A	TRUE	CATTAGTGAGCTGGCCAAAC	CTGGCTCTTTGAGAATGTGG	TCG+C+G+A+GATGT	TCG+C+A+AG+A+T+GT
DNMT3A	S714C	2	25463541	G	C	TRUE	CTTGCGAGCAGGGTTGA	GGGCCCATTCGATCTGG	AT+G+G+AGA+G+GT	AT+G+C+AG+AG+G+TC
DNMT3A	M801V	2	25462006	T	C	TRUE	CAGGAGCTTTCACCAACCT	TGATGCCAAAGAAGTGTCAG	CC+GG+T+A+TG+AA+CA	CGG+T+G+TG+AA+CA
DNMT3A	G685R	2	25464460	C	T	TRUE	ATACATGCTTCTGTGTGACG	GTGTGTGAGGACTCCATCA	TCC+C+C+GACGTA	CC+C+T+GA+C+GTA
DNMT3A	V704fs	2	25463569	TCA	T	TRUE	ATGGAGAGGTCATTGCAGG	TGCCTTTATCCTCCCAGATC	CC+AAT+C+A+CC+A+GA	CC+CAA+T+CC+A+GATC
DNMT3A	E629fs	2	25466816	CT	C	TRUE	CATCAAAGAGAGACAGCACC	ATCTGACCTGTTGTGCTCA	CT+CTT+C+T+CA+G+CT	CT+CTT+C+CA+G+CT
DNMT3A	C549fs	2	25467430	CA	C	TRUE	GCTAAGGAGACCACTGGAG	AGTCCTACTGCACCATCTG	TC+CG+C+A+CAT+GA	TC+C+GC+C+AT+GA
DNMT3A	V560fs	2	25467196	AC	A	TRUE	CCTTAATGGCTGCCTGGG	CTCTGCTCACTGGGTCTC	AC+T+CC+A+C+GC+AAA	AC+T+C+CA+G+C+AAA
DNMT3A	F752_W753fs	2	25463235	CAG	C	TRUE	GAGATGTCCCTCTTGTCACT	CCAAGGAGGGAGATGATCG	AG+CC+A+G+A+AG+AAG	AG+C+C+AA+GA+AGG
DNMT3A	R767fs	2	25463193	CT	C	TRUE	GCTATACCTCGAGAAATCGC	CTGGCTCTTTGAGAATGTGG	TG+T+CC+C+T+CT+T	TG+T+C+CCC+T+TG
DNMT3A	Q534*	2	25467476	G	A	TRUE	TTGTTGTTTCCGCACATGAG	CTTTCTGGAGTGTGCGTAC	AC+T+G+GT+AG+CC	AC+T+A+GT+A+G+CCG
DNMT3A	W893*	2	25457209	C	T	TRUE	GAAGAGGTGGCGGATGAC	TACTGACGTCTCCAACATGA	CA+T+G+GA+GC+GT	TCA+T+A+GA+G+C+GT
DNMT3A	R635P	2	25466799	C	G	TRUE	CTCACCTGTAGCGATTCCAT	CTCACTGCTTAGGACCCTC	CAC+C+C+GGA+TG	CAC+C+G+GGA+TG
DNMT3A	D781H	2	25462066	C	G	TRUE	AGAAGTAGCGGGCCCT	ATCTTCAAACCGTCTCCTGT	TG+AT+T+G+ATG+CCA	TGAT+T+C+ATG+C+CA
DNMT3A	L754H	2	25463232	A	T	TRUE	GAGATGTCCCTCTTGTCACT	CCAAGGAGGGAGATGATCG	CAAA+G+A+GCC+A+GA	CAAA+G+T+GCC+A+GA
DNMT3A	K855*	2	25458610	T	A	TRUE	CTTTCCATTTCAGTGCACCA	CAAACTCCATAAAGCAGGGC	CCT+CT+T+T+CT+C+ATTC	CCT+CT+T+A+CT+C+ATTC
DNMT3A	R659H	2	25464537	C	T	TRUE	TGATGGAGTCCTCACACAC	GGCTCCTGGTGCTGAAG	TA+G+C+GG+TC+CA	TA+G+T+GGT+C+CA
DNMT3A	F868S	2	25457284	A	G	TRUE	TCATGTTGGAGACGTCAGTA	CTCACCCTGCCCTCTCT	ACC+A+A+ATA+C+C+CT	ACC+A+G+ATA+C+CC
DNMT3A	V897F	2	25457198	C	A	TRUE	TCCCTTACACACACGCAA	CTGACGTCTCCAACATGAG	ATG+A+C+TG+GC+ACG	ATG+A+A+TG+G+CA+CG
DNMT3A	F731L	2	25463302	A	G	TRUE	CGATCATCTCCCTCCTTGG	TTTCTCTTCCGACCTCTCAG	AAG+A+A+GAG+C+CG	AAG+A+G+GA+G+CC
DNMT3A	D747Y	2	25463254	C	A	TRUE	CCACATTCTCAAAGAGCCAG	TTCTTTGAGTTCTACCGCCT	TCA+T+C+TC+C+CTC	TCA+T+A+TC+CC+T+CC
DNMT3A	L859*	2	25458597	A	C	TRUE	AGATGCCAGCACAACCC	CTCCATAAAGCAGGGCAAAG	AC+CA+T+A+A+GAT+GTCC	AC+CA+T+C+AGA+TGTC
DNMT3A	W297S	2	25470584	C	G	TRUE	CATCCACCAAGACACAATGC	TGTAATGATTTCTGCTCCTTGG	CC+C+C+AC+ACCAG	CC+C+G+ACAC+CAG
DNMT3A	L737R	2	25463283	A	C	TRUE	CGATCATCTCCCTCCTTGG	TTTCTCTTCCGACCTCTCAG	AG+G+A+GGCGGT	AG+G+C+GGCGGTA
DNMT3A	V296L	2	25470588	C	A	TRUE	TCATCCACCAAGACACAATG	ACTGTGTAATGATTTCTGCTCC	CAC+A+C+CA+G+CTC	CAC+A+A+CA+G+CT+CC
DNMT3A	D768N	2	25463191	C	T	TRUE	GCTATACCTCGAGAAATCGC	CTGGCTCTTTGAGAATGTGG	AG+AG+G+G+AC+A+TC	AG+AG+G+A+ACA+T+CT
DNMT3A	F751V	2	25463242	A	C	TRUE	GAGATGTCCCTCTTGTCACT	TTCTTTGAGTTCTACCGCCT	CC+C+T+TC+T+T+CTGG	CC+C+G+TC+T+T+CT
DNMT3A	D658N	2	25464541	C	T	TRUE	TGATGGAGTCCTCACACAC	GGCTCCTGGTGCTGAAG	CGG+T+C+CA+CCT	CGG+T+T+CA+CC+TG
DNMT3A	L295P	2	25470590	A	G	TRUE	TCATCCACCAAGACACAATG	ACTGTGTAATGATTTCTGCTCC	CAC+C+A+GC+TCCC	CAC+C+G+GCTCC
DNMT3A	L547F	2	25467437	G	A	TRUE	GCTAAGGAGACCACTGGAG	AGTCCTACTGCACCATCTG	ATG+A+G+CA+C+CT	ATG+A+A+CA+C+CT+CA
DNMT3A	G707C	2	25463563	C	A	TRUE	ATGGAGAGGTCATTGCAGG	TGCCTTTATCCTCCCAGATC	TG+C+C+CCCAAT	TG+C+A+CC+C+A+AT
DNMT3A	W601*	2	25467072	C	T	TRUE	CTCACAAATTCCTGGTCGTG	CTGGAACTGCTACATGTGC	CT+G+G+CCC+TCC	ACT+G+A+CC+C+TCC
DNMT3A	S663fs	2	25464525	GAG	A	TRUE	TGATGGAGTCCTCACACA	GGCTCCTGGTGCTGAAG	CCT+CC+GA+GG+CAAT	CC+T+C+CAG+C+A+AT
DNMT3A	G843fs	2	25458646	CC	G	TRUE	AGTGCACCATAAGATGTCCT	TCAGCAAAGTGAGGACCATT	TT+G+CC+CT+G+CTT	TTG+C+G+TG+C+T+TT
IDH2	R140W	15	90631935	G	A	TRUE	TTTGCAGATGATGGGCTCC	GTCCTCACAGAGTTCAAGCT	TC+C+G+GA+T+AGT	TC+C+A+GA+T+A+GTTC
IDH2	R140Q	15	90631934	C	T	TRUE	GACTAGGCGTGGGATGTTT	GTCCTCACAGAGTTCAAGCT	TC+C+G+GAA+C+AT	TC+C+A+GAA+C+ATCC
JAK2	R938Q	9	5090497	G	A	TRUE	AAAGGTCGGCGTAATCTAAA	TCTGAGATGTGTACTGCAGA	TA+C+G+A+GA+C+TATC	AGT+TTA+C+A+A+GA+C+TAT
JAK2	V617F	9	5073770	G	T	TRUE	AGCAAGTATGATGAGCAAGC	GCTCTGAGAAAGGCATTAGA	ATG+T+G+TC+T+G+TG	ATG+T+T+T+CTG+T+GG
JAK2	R683G	9	5078360	A	G	TRUE	TTCATGGGAATGTATGTGCC	TGCCAGGATCACTAAGTTTG	CT+T+AT+C+AG+A+G+AAG	AT+C+G+G+AG+A+AG
KRAS	A146T	12	25378562	C	T	TRUE	CAGTGTTACTTACCTGTCTTGT	AAACAGGCTCAGGACTTAG	CAT+C+A+G+CAA+A+GA	ACAT+C+A+A+CAA+A+G+AC
KRAS	A146V	12	25378561	G	A	TRUE	TCAGTGTTACTTACCTGTCTTG	AAACAGGCTCAGGACTTAG	TC+TT+T+G+CTG+A+TGT	TGT+CTT+T+A+CTG+A+TGT
KRAS	Q22K	12	25398255	G	T	TRUE	TCTATTGTTGGATCATATTCGTCC	ACTTGTGGTAGTTGGAGCTG	AG+C+T+G+TA+T+CG	TAG+C+T+T+TAT+C+G+TCA
KRAS	L19F	12	25398262	C	A	TRUE	TCTATTGTTGGATCATATTCGTCC	ACTTGTGGTAGTTGGAGCTG	TCG+T+C+AA+G+GC	TCG+T+A+AA+G+GC+AC
KRAS	T20M	12	25398260	G	A	TRUE	TCTATTGTTGGATCATATTCGTCC	ACTTGTGGTAGTTGGAGCTG	TG+A+C+GAT+A+C+AGC	TG+A+T+GATA+CA+G+CT
KRAS	T58I	12	25380285	G	A	TRUE	TTGCACTGTACTCCTCTTGA	GGAAGCAAGTAGTAATTGATGGA	TGC+T+G+TG+T+CG	CTGC+T+A+TG+T+C+GA
KRAS	A146P	12	25378562	C	G	TRUE	CAGTGTTACTTACCTGTCTTGT	AAACAGGCTCAGGACTTAG	AT+C+A+G+CA+A+A+GA	CT+TT+G+G+TGA+T+GT
KRAS	G60D	12	25380279	C	T	TRUE	TACACAAAGAAAGCCCTCCC	TGTCTCTTGGATATTCTCGACA	TG+A+C+CT+GCT+GT	TG+A+T+C+TGC+T+GT
KRAS	A59G	12	25380282	G	C	TRUE	CTCATGTACTGGTCCCTCAT	GGAAGCAAGTAGTAATTGATGGA	CC+T+G+CTG+T+GT	ACC+T+C+CT+G+TGT
KRAS	Q61P	12	25380276	T	G	TRUE	TACACAAAGAAAGCCCTCCC	TCTCTTGGATATTCTCGACACA	CCTC+T+T+GA+CC+TG	CCTC+T+G+GA+CC
NRAS	G13D	1	115258744	C	T	TRUE	AGTGGTTCTGGATTAGCTGG	GGTTCTTGCTGGTGTGAAAT	AA+C+A+C+CAC+CT	AA+C+A+T+CA+C+CT
NRAS	Q61R	1	115256529	T	C	TRUE	TTCGCCTGTCCTCATGTATT	ACAAGTGGTTATAGATGGTGAA	CTT+C+T+T+GT+C+CA	CTTC+T+C+GTC+C+AG
NRAS	G13V	1	115258744	C	A	TRUE	AGTGGTTCTGGATTAGCTGG	GGTTCTTGCTGGTGTGAAAT	AAC+A+C+C+AC+CTG	AA+C+A+A+CA+C+CT
NRAS	A146T	1	115252204	C	T	TRUE	CTGAAAGCTGTACCATACCTG	GGCCAAGAGTTACGGGATT	CTTG+G+C+TG+A+GG	CT+TG+G+T+T+GA+GG
NRAS	G13R	1	115258745	C	G	TRUE	AGTGGTTCTGGATTAGCTGG	GGTTCTTGCTGGTGTGAAAT	AA+CA+C+C+ACCTG	AA+CA+C+G+ACC+TG
TET2	R1216*	4	106164778	C	T	TRUE	AGAAGCAGCAGTGAAGAGAA	AGAATCACAATCACTGCAGC	AGCT+C+G+CT+CC	AGCT+C+A+CTC+CC
TET2	R544*	4	106156729	C	T	TRUE	TGGAGAGCTACAGGACAAC	CAGATAGTGCTGTGTTGGG	TCT+C+G+AC+CC+TT	TC+T+C+A+AC+C+CT
TET2	R1452*	4	106193892	C	T	TRUE	GAGTGTGGAAGCTCAGGAG	TCTAGTTTCCTTTGTCGGCA	TT+CG+G+C+GA+A+AAG	TTC+G+G+T+GA+AA+AG
TET2	R1359H	4	106190798	G	A	TRUE	TTCGCATTCACACACACTTT	AAGTCCAAACATGCAGTGAC	CAG+A+C+GG+C+AC	CAG+A+T+GG+CA+CT
TET2	R1359C	4	106190797	C	T	TRUE	TTCGCATTCACACACACTTT	AAGTCCAAACATGCAGTGAC	AGA+C+G+G+CACT	AGA+C+A+GCA+C+TC
TET2	S1059*	4	106158275	C	G	TRUE	ACTCTCAAATCACAGAAGCA	GTGGCTATCAAGTTCTGCAG	AT+G+T+C+AG+GGC	AATG+T+G+AG+GGC
TET2	R550*	4	106156747	C	T	TRUE	AGATTCTGAAGGGTCGAGAC	GGGCCTTCAATTCAATCCAT	CAA+AC+A+C+GA+GAT+CT	CAAA+C+A+T+GA+GAT+CT
TET2	R1366H	4	106190819	G	A	TRUE	TATGAACACAGAGCACCAGA	AAGTCCAAACATGCAGTGAC	TGG+A+C+GGCC+TT	TGG+A+T+GG+CC+TT
TET2	I274fs	4	106155920	TC	T	TRUE	TGAGTTGTCCTGTGAGATCA	AGAGTTAGAGGTCTGTGCG	CA+G+AT+C+AATT+C+CG	CA+G+A+TAAT+T+C+CGC
TET2	N132fs	4	106155494	AT	A	TRUE	AGGCTAATGGAGAAAGACGT	CGGAGACATTTGGTTGACTG	AA+G+AA+ATC+CAG+GT+GA	AA+G+AA+AC+CAG+GT+GA
TET2	T1183fs	4	106164036	TAC	T	TRUE	TTGGACAGAAGGGTAAAGCT	TCACACTTACCCACTTAGCA	TCA+T+C+TATA+CT+G+GTA	TCA+T+C+TATT+G+G+TAAAGA
TET2	G1442fs	4	106193863	GT	G	TRUE	ATGAGTTTGGGAGTGTGGAA	TTGACTGGCTCTGCTAACAT	AGTG+G+TG+C+CAT	AGTG+GG+C+C+AT
TET2	Q910fs	4	106157826	AC	A	TRUE	CAAGCTTCAGTTCTACAGGG	ATCAAGTACCTTTGCTGAGC	TGG+T+CA+ACAA+G+CT	TGG+T+CA+AA+A+G+CT
TET2	E1268fs	4	106164934	GA	G	TRUE	CCGAGACGCTGAGGAAATA	TATCAGTGGCCGCAAAGAG	AT+GAA+G+A+G+TAA+GTGA	AT+GAA+G+G+T+AA+GTGA
TET2	Y1766fs	4	106196963	TA	T	TRUE	TGAACATCATTCACCTTCTCAC	AAGAGAGCTGTTGAACATGC	CA+TAA+C+T+ACAGT+G+CA	CA+TAA+C+T+CAGT+G+CA
TET2	Q1532fs	4	106196260	AC	A	TRUE	TTTGCGACTTTCAGGACCA	TGAGGGTGATGTGGCTG	CCT+CT+A+C+AG+A+AGC	CCT+C+TA+A+GAA+G+CA
TET2	K1317fs	4	106180922	A	AT	TRUE	CAGAAGCAAGATCCCAAGG	AGCGATTATACATCAGGAAGT	CC+C+AA+AA+GA+G+GT	CC+CA+AA+TA+GA+G+GT
TET2	V1136_E1137fs	4	106158506	TAGGTA	T	TRUE	ACACCTGTCAAGACTCAATATG	GGATAAACGCCATGTGTCTC	TGT+G+TA+G+GTA+A+GTG	AT+GT+GA+GTG+C+CA
TET2	D1042fs	4	106158222	TG	T	TRUE	CATCATTGAGACCATGGAGC	CTGGCCCTGACATTTCAAC	CGT+T+ATTT+G+A+C+CATAA	TC+GTTATTT+A+C+CATA+A+GG
TET2	V1417F	4	106193787	G	T	TRUE	GACAATCGAGAATTTGGAGGA	ATCCACGTCAGAGACTTTGT	TCA+C+G+TTC+T+GC	CA+C+T+TTC+T+G+CC
TET2	Y1421*	4	106193801	C	G	TRUE	GACAATCGAGAATTTGGAGGA	TTCCACACTCCCAAACTCAT	TA+T+A+C+AAAG+T+CTCTGA	TA+T+A+G+AAAG+T+CTCTG
TET2	E1234*	4	106164832	G	T	TRUE	GCTGCAGTGATTGTGATTCT	TCCGAGTAGAGTTTGTCAGC	TGTG+G+G+AA+GGA	TG+TG+G+T+AAG+G+AA
TET2	D1376N	4	106190848	G	A	TRUE	GTCTGGGTCTGAAGGAAGG	ATGTTGTGCAAGTCTCTGTG	TT+G+G+ACT+T+C+TG	TT+G+A+ACT+TC+T+G+TG
TET2	R1214P	4	106164773	G	C	TRUE	AGAAGCAGCAGTGAAGAGAA	AGAATCACAATCACTGCAGC	TG+C+G+GGAGCG	TG+C+C+GGAGCG
TET2	G1370V	4	106190831	G	T	TRUE	GTCTGGGTCTGAAGGAAGG	ATGTTGTGCAAGTCTCTGTG	TCA+G+G+GGTC+AC	TCA+G+T+GG+T+CAC
TET2	Q341fs	4	106156121	A	GC	TRUE	TGCCCATCTCCTGCAG	CCTGAACAGAATTCTTCACCA	CA+TC+C+A+GG+GAA	ATC+C+GC+GG+GAA
TET2	R96_T97fs	4	106155383	AACGCAC	GA	TRUE	CACAAGAAAGTAGAGGGTATTCC	TTCTTGATCTGAAGGAGCCC	AA+AA+C+G+CA+C+AG	AG+GAATA+A+GA+A+GTTA+GT
TP53	L130R	17	7578541	A	C	TRUE	GAATCAACCCACAGCTGC	TCAACTCTGTCTCCTTCCTC	GTT+G+A+GGG+CA	TGTT+G+C+GG+GC
TP53	C238S	17	7577568	C	G	TRUE	CAGTGTGATGATGGTGAGGA	TAGGTTGGCTCTGACTGTAC	ACTG+TT+A+C+ACA+T+GT	ACT+GTT+A+G+ACA+T+GT
TP53	G266E	17	7577141	C	T	TRUE	ACAAACACGCACCTCAAAG	ACCTGATTTCCTTACTGCCT	TCCG+T+C+CCAGT	TC+CG+T+T+CCA+GT
TP53	R248W	17	7577539	G	A	TRUE	CAGTGTGATGATGGTGAGGA	CTGTACCACCATCCACTACA	CTC+C+G+GT+T+CA	CT+C+C+A+GTT+C+AT
TP53	R248Q	17	7577538	C	T	TRUE	CAGTGTGATGATGGTGAGGA	CTGTACCACCATCCACTACA	CT+C+C+GG+T+TCA	CCT+C+T+GGT+T+CA
TP53	R282W	17	7577094	G	A	TRUE	CGGAGATTCTCTTCCTCTGT	GGGACGGAACAGCTTTGA	AGA+C+C+GGCGC	AGA+C+T+GGC+GC
TP53	V173M	17	7578413	C	T	TRUE	GCTCACCATCGCTATCTGA	CATCTACAAGCAGTCACAGC	CTC+A+C+A+AC+CT+CC	CTC+A+T+AA+C+CT+CC
TP53	R273H	17	7577120	C	T	TRUE	CGGAGATTCTCTTCCTCTGT	TTCCTATCCTGAGTAGTGGT	AC+A+C+GC+AC+CTC	AC+A+T+GCA+C+CT
TP53	Y220C	17	7578190	T	C	TRUE	TGACAACCACCCTTAACCC	TTTGCGTGTGGAGTATTTGG	TC+A+T+AG+G+G+CA	CTC+A+C+AGG+G+C
TP53	Q144*	17	7578500	G	A	TRUE	TGCTTGTAGATGGCCATGG	CCTGCCCTCAACAAGATGT	AGC+T+G+CA+CAGG	AGC+T+A+C+AC+A+GG
TP53	R249S	17	7577534	C	A	TRUE	GAGTCTTCCAGTGTGATGATG	CTGTACCACCATCCACTACA	TGG+G+C+CTCCG	TGG+G+A+CT+CCG
TP53	R181H	17	7578388	C	T	TRUE	TGCTCACCATCGCTATCTG	CATCTACAAGCAGTCACAGC	AG+C+G+CTGC+TC	AG+C+A+CT+GC+TCA
TP53	R249S	17	7577534	C	G	TRUE	GAGTCTTCCAGTGTGATGATG	CTGTACCACCATCCACTACA	CGGA+G+G+CCCA	CGGA+G+C+CCCA
TP53	R249T	17	7577535	C	G	TRUE	CAGTGTGATGATGGTGAGGA	CTGTACCACCATCCACTACA	CGG+A+G+GCCCA	CGG+A+C+GCC+CA
TP53	K120E	17	7579329	T	C	TRUE	CAGGCATTGAAGTCTCATGG	AGGGCAGCTACGGTTTC	CAG+C+C+A+AG+TCT	AGC+C+G+AGT+CT
TP53	R267W	17	7577139	G	A	TRUE	ACAAACACGCACCTCAAAG	ACCTGATTTCCTTACTGCCT	TG+GG+A+C+GGAAC	TG+GG+A+T+GG+A+AC
TP53	P278S	17	7577106	G	A	TRUE	CGGAGATTCTCTTCCTCTGT	TTCCTATCCTGAGTAGTGGT	CC+A+G+G+AC+AGG	CCA+G+A+ACA+G+GC
TP53	K132Q	17	7578536	T	G	TRUE	GAATCAACCCACAGCTGC	TCAACTCTGTCTCCTTCCTC	CAT+C+T+T+GTT+G+AGG	ATC+T+G+GT+TG+AGG
TP53	D281N	17	7577097	C	T	TRUE	CGGAGATTCTCTTCCTCTGT	GGGACGGAACAGCTTTGA	CGG+T+C+TCT+CCC	CGG+T+T+TCT+C+CC
TP53	S215C	17	7578206	T	A	TRUE	TTGCAAACCAGACCTCAGG	GAGTGGAAGGAAATTTGCGT	ACA+C+T+AT+GT+C+GA	CACA+C+A+AT+GT+C+GA
TP53	C141Y	17	7578508	C	T	TRUE	GAATCAACCCACAGCTGC	CCTCTTCCTACAGTACTCCC	AGG+G+C+A+GGTC	AGG+G+T+AG+G+TCT
TP53	C277Y	17	7577108	C	T	TRUE	CGGAGATTCTCTTCCTCTGT	TTCCTATCCTGAGTAGTGGT	AGG+A+C+AG+GC+AC	AGG+A+T+AG+G+C+AC
TP53	V218E	17	7578196	A	T	TRUE	TTGCAAACCAGACCTCAGG	AGTGGAAGGAAATTTGCGTG	AG+GG+C+A+CCAC	AG+GG+C+T+CCAC
TP53	R273C	17	7577121	G	A	TRUE	CGGAGATTCTCTTCCTCTGT	TTCCTATCCTGAGTAGTGGT	ACA+C+G+CA+CCT	ACA+C+A+C+AC+CTC
TP53	A276P	17	7577112	C	G	TRUE	CGGAGATTCTCTTCCTCTGT	TTCCTATCCTGAGTAGTGGT	ACAG+G+C+A+CA+A+AC	ACAG+G+G+A+CA+AAC
TP53	P278H	17	7577105	G	T	TRUE	CGGAGATTCTCTTCCTCTGT	GGGACGGAACAGCTTTGA	TCCC+A+G+GA+CAG	TC+CC+A+T+G+AC+AG
TP53	R290H	17	7577069	C	T	TRUE	CTTGCTTACCTCGCTTAGTG	CTTTGAGGTGCGTGTTTGT	TCTT+G+C+GG+A+GA	TC+TT+G+T+GG+A+GA
TP53	Y205S	17	7578235	T	G	TRUE	ACCACCACACTATGTCGAAA	CCTCAGCATCTTATCCGAGT	TC+CAA+A+T+ACT+C+CA	CCAA+A+G+AC+T+CCA
TP53	V31I	17	7579705	C	T	TRUE	GCCCAACCCTTGTCCTTA	TTCCATGGGACTGACTTTCT	CCA+GA+A+C+G+TT+GT	CC+AG+A+A+T+GT+T+GT
TP53	G245S	17	7577548	C	T	TRUE	CAGTGTGATGATGGTGAGGA	TAGGTTGGCTCTGACTGTAC	ATG+C+C+GCCCA	ATG+C+T+GCC+CA
TP53	V197M	17	7578260	C	T	TRUE	CCAAATACTCCACACGCAAA	GCCTCTGATTCCTCACTGAT	TCC+A+C+TC+G+G+AT	TT+CC+A+T+TC+G+G+AT
TP53	G266V	17	7577141	C	A	TRUE	ACAAACACGCACCTCAAAG	ACCTGATTTCCTTACTGCCT	CG+T+C+CC+A+GTA	CCG+T+A+CC+A+G+TA
TP53	Q317*	17	7576897	G	A	TRUE	CCCAAGACTTAGTACCTGAAG	TATCACCTTTCCTTGCCTCT	TCC+C+C+AGCCA	CTCC+C+T+AG+CCA
TP53	A138P	17	7578518	C	G	TRUE	GAATCAACCCACAGCTGC	TCAACTCTGTCTCCTTCCTC	TTG+G+C+CA+GT+TG	TTG+G+G+CAG+T+TG
TP53	P27del	17	7579714	CAGG	C	TRUE	CCAACCCTTGTCCTTACCA	TTCCATGGGACTGACTTTCT	TGT+T+TTCA+G+GAA+G+TC	TGTTT+T+CA+A+G+T+CTG
TP53	K292_G293fs	17	7577060	CCTTT	C	TRUE	CTTGCTTACCTCGCTTAGTG	GCGCACAGAGGAAGAGAAT	TC+CC+C+TT+T+C+TT	CT+C+CCC+TT+GCG
TP53	S215R	17	7578204	A	C	TRUE	TTGCAAACCAGACCTCAGG	GAGTGGAAGGAAATTTGCGT	CATA+G+T+GT+G+G+TG	ATA+G+G+GTG+G+TG
SF3B1	K666N	2	198267359	C	A	FALSE	Bio-Rad Assay	Bio-Rad Assay	Bio-Rad Assay	Bio-Rad Assay
STAT3	S614R	17	40475068	G	C	FALSE	Bio-Rad Assay	Bio-Rad Assay	Bio-Rad Assay	Bio-Rad Assay
STAT3	D661Y	17	40474420	C	A	FALSE	Bio-Rad Assay	Bio-Rad Assay	Bio-Rad Assay	Bio-Rad Assay
STAT3	G618R	17	40475058	C	G	FALSE	Bio-Rad Assay	Bio-Rad Assay	Bio-Rad Assay	Bio-Rad Assay
STAT3	N647I	17	40474461	T	A	FALSE	Bio-Rad Assay	Bio-Rad Assay	Bio-Rad Assay	Bio-Rad Assay
STAT3	S614R	17	40475070	T	G	FALSE	Bio-Rad Assay	Bio-Rad Assay	Bio-Rad Assay	Bio-Rad Assay
STAT3	Y640F	17	40474482	T	A	FALSE	Bio-Rad Assay	Bio-Rad Assay	Bio-Rad Assay	Bio-Rad Assay
TP53	A138T	17	7578518	C	T	FALSE	Bio-Rad Assay	Bio-Rad Assay	Bio-Rad Assay	Bio-Rad Assay
TP53	R175H	17	7578406	C	T	FALSE	Bio-Rad Assay	Bio-Rad Assay	Bio-Rad Assay	Bio-Rad Assay
DNMT3A	R729W	2	25463308	G	A	FALSE	Bio-Rad Assay	Bio-Rad Assay	Bio-Rad Assay	Bio-Rad Assay
GNAS	R201H	20	57484421	G	A	FALSE	Bio-Rad Assay	Bio-Rad Assay	Bio-Rad Assay	Bio-Rad Assay
KRAS	L19F	12	25398262	C	G	FALSE	Bio-Rad Assay	Bio-Rad Assay	Bio-Rad Assay	Bio-Rad Assay
BCOR	R810*	X	39932171	G	A	TRUE	AAAGCTGGGTTTGGACAC	CAACTGGAATCAAGGGAAGA	CT+C+C+GAGA+A+GA	CT+C+T+G+AGA+A+GA
BCOR	R1183*	X	39923059	G	A	TRUE	GTCACTTCCTTCCTGCTTTG	GAATTAACAGGGCTCCATCC	AGA+A+C+GAT+GG+GA	AGA+A+T+G+AT+G+GG
BCOR	R1480*	X	39916463	G	A	TRUE	GTTGACATCAGCGCCATATT	ATCGGGACAACGCAGG	TGT+G+C+GAC+A+CC	TGT+G+T+GA+C+ACC
BCOR	I1532_M1535>M	X	39914655	CATTTTCATG	C	TRUE	TCTTGAACTTTGTCATACCTGT	CTTGGCTACGTACTCAGGTA	TTT+C+AT+GA+T+G+GT	TGGG+T+CA+T+GGT
NF1	R1513*	17	29588751	C	T	TRUE	AGTAGTTTGCTGTATCTAGGGA	GACCCAGGTATGCAAGAAGT	AAG+A+C+GA+C+CT	TG+GAAG+A+T+GA+CC
NF1	R440*	17	29533315	C	T	TRUE	TGGATTGGTGGCCTAAGATT	CACAACCTTGCACTGCTTTA	TT+C+G+AA+GT+TC+AACC	TT+C+A+AA+GTT+C+AACCG
NF1	R1947*	17	29661945	C	T	TRUE	GACTCCATGGCTGTCAAATC	TGGTCATTGTTATCAGCTTGT	TGCC+AA+A+C+GAC+A+AA	TGCC+AA+A+T+GAC+A+AAGA
NF1	R2496*	17	29679366	C	T	TRUE	CTCCCAAAGGTTCTGAAGGA	TCTTAGTGTTGGCCTGAGAA	TCC+C+C+GAGCC	TCC+C+T+GAG+CC
NF1	T2590_D2591fs	17	29684069	TACTG	T	TRUE	AGCACCCACATTTACGTAAAG	CTAGAACAGTAAGAAGCAGCG	TA+CTTA+C+T+GA+T+CC	AG+TA+C+TTAT+C+C+GA
NF1	I2710>NF	17	29687535	A	AACT	TRUE	ACAGCAAACACAAATTCCAGA	CAGGTACGTGTCAATCAAGG	CTG+A+G+CTTA+T+T+GTT	TGA+G+CTTA+ACT+T+T+GTT
RAD21	R65*	8	117875450	G	A	TRUE	TGCTTCATTACAGTCTGCAAG	CGGACATCAGGACATCTCTT	AT+T+C+G+AA+CTA+CT	AG+ATT+C+A+AA+CTACT+CC
RAD21	I170_M171>M	8	117869681	CATT	C	TRUE	GTGCTTACTAACATGTCGTCA	TTTGGAATGGATGATCGTGA	TCT+CT+CAT+T+A+T+CTCA	TCT+CT+C+A+T+CT+CAC
RAD21	R586*	8	117859879	G	A	TRUE	CTGTAGAACTTTGCGGCAG	TTTATTTCAGCGTGCTCTTG	ATG+T+C+GA+A+ATA+CGA	ATG+T+T+GA+A+ATA+C+GA
STAT3	D661V	17	40474419	T	A	FALSE	Bio-Rad Assay	Bio-Rad Assay	Bio-Rad Assay	Bio-Rad Assay
ASXL1	R321W	20	31019464	C	T	TRUE	AGCAGTGCACTAAATAACGAG	TCTACATACCATCAGCCAGG	TG+G+C+GGGAGC	TG+G+T+GGGA+GC
ASXL1	A1312V	20	31024450	C	T	TRUE	AATGTTACAGGCCAAGGGAA	GGGATCTCAGCAGGAAGAG	CT+G+C+AA+CC+CTT	CT+G+T+AA+C+CC+TTC
ASXL1	D1180fs	20	31024054	AT	A	TRUE	CCAGTTCTTTAAGGGCTTTGA	GGTGGCCTCAATCCTGG	CC+A+G+ATTA+G+CT+GTG	CC+A+G+ATA+G+CT+GTG
ASXL1	S25fs	20	30954202	TC	T	TRUE	TGCACACTGAAATTAGGACG	TCCTTTAGTCCTTCTGCCTC	AACTA+C+TC+G+GAT+GC	AACTA+C+T+G+GAT+GC
ASXL1	E537K	20	31021610	G	A	TRUE	AACCCAAGGATCAGAAGAGG	GTGTTACGAAAGGACTGACG	TTCC+C+G+AA+A+A+GA	CTTT+CC+C+A+AAA+A+GAAG
ASXL1	E928*	20	31023297	G	T	TRUE	GAAACAGCCCAAACCAGAAT	CCCTCCTCAGCTGTCAAAT	TGG+A+G+AG+G+AG	TT+GG+A+T+AG+G+AGT
CBL	C396R	11	119148966	T	C	TRUE	GGCTCCACATTCCAACTATG	TTTAGATCCGTACCTGCCAG	CC+C+T+GTGGA+CA	CC+C+C+GTGGACA
DNMT3A	R792H	2	25462032	C	T	TRUE	GCTTTCACCAACCTGTTCAT	GTAGTCCAACCCTGTGATGA	AGTA+G+C+GGGCC	AG+TA+G+T+GG+GC
DNMT3A	R771Q	2	25463181	C	T	TRUE	CATTAGTGAGCTGGCCAAAC	CTGGCTCTTTGAGAATGTGG	TCG+C+G+ATT+T+CT	CT+CG+C+A+ATT+T+CTC
DNMT3A	Y533C	2	25467478	T	C	TRUE	TTGTTGTTTCCGCACATGAG	CTTTCTGGAGTGTGCGTAC	TG+G+T+AG+CC+GT	TG+G+C+AGCCGT
DNMT3A	Q402*	2	25469564	G	A	TRUE	CCAGGGCCCATTCAATCAT	GACAGCGATGAGAGTGACA	TTC+T+G+C+AC+CTC	TT+C+T+A+CAC+C+TCC
DNMT3A	P424_P425fs	2	25469493	TGGTGG	T	TRUE	CCCTGGTGTGGATCTGC	CATGATTGAATGGGCCCTG	TTCTG+G+T+GGC+TC	CC+T+TC+T+CTC+C+AG
DNMT3A	A353fs	2	25469984	GC	G	TRUE	TAGATGGCTTTGCGGTACAT	TGTGTGTTGAGAAGCTGATG	AAC+G+C+AC+T+GCA	AA+C+G+AC+T+GCA
DNMT3A	E400*	2	25469570	C	A	TRUE	CCAGGGCCCATTCAATCAT	GACAGCGATGAGAGTGACA	ACC+T+C+C+ACGG	CC+T+A+CA+C+GGC
DNMT3A	A398V	2	25469575	G	A	TRUE	CCAGGGCCCATTCAATCAT	GACAGCGATGAGAGTGACA	CC+AC+G+G+CC+TT	TCC+AC+G+A+CC+T+TG
DNMT3A	S535Y	2	25467472	G	T	TRUE	TTGTTGTTTCCGCACATGAG	CTTTCTGGAGTGTGCGTAC	TA+G+G+AC+TG+G+TA	AGTA+G+T+A+CTG+G+TAG
DNMT3A	S837L	2	25458663	G	A	TRUE	GGTCTTTGCCCTGCTTTATG	TCTCCTCTTCATCTAGTTCAGC	AGG+T+C+AAAC+TC+CA	AG+G+T+T+AAAC+T+CCA
DNMT3A	P849L	2	25458627	G	A	TRUE	CAGTGCACCATAAGATGTCC	CTCCATAAAGCAGGGCAAAG	AGAC+A+G+GA+A+A+ATGC	AGA+C+A+G+GA+A+AATG
DNMT3A	K744T	2	25463262	T	G	TRUE	CCACATTCTCAAAGAGCCAG	TTCTTTGAGTTCTACCGCCT	TC+C+T+TGG+G+CC	TC+C+G+TGGGCC
DNMT3A	A782D	2	25462062	G	T	TRUE	AGAAGTAGCGGGCCCT	ATCTTCAAACCGTCTCCTGT	TT+T+G+G+CA+T+CA	TCTT+T+G+T+CA+T+CAAT
DNMT3A	F732I	2	25463299	A	T	TRUE	CGATCATCTCCCTCCTTGG	TTTCTCTTCCGACCTCTCAG	ACT+CA+A+A+GAA+GA+GC	CT+CA+A+T+GA+AG+AGC
DNMT3A	L813M	2	25459846	G	T	TRUE	CATGCTCCAGACACTCCTG	AGTCTCTCTTCTGCCTCCTA	CT+CC+A+G+CTTA+T+CA	AG+CT+CC+A+T+CTTA+TC
DNMT3A	T316K	2	25470527	G	T	TRUE	TCTCCGAACCACATGACC	GCCGCATTGTGTCTTGG	CC+C+G+TC+A+T+CC	CC+C+T+TCA+T+CC+AC
DNMT3A	L295M	2	25470591	G	T	TRUE	TCATCCACCAAGACACAATG	ACTGTGTAATGATTTCTGCTCC	CC+A+G+CTCC+CC	CC+A+T+CTC+C+CC
DNMT3A	V649M	2	25464568	C	T	TRUE	CCTGAATGCCCAAGTCCTT	AGATGGCTCCAAGTAACGG	CA+GC+A+C+CA+GG	CA+GC+A+T+C+AG+GA
DNMT3A	T503N	2	25468168	G	T	TRUE	GTGTGCTCCTACCTTGCA	AGACATCTGCATCTCCTGTG	CCAG+G+G+TAA+C+AT	CCA+G+G+T+TAA+C+AT
DNMT3A	Y526*	2	25467498	G	T	TRUE	AGTAGGACTGGTAGCCGT	CTTCCCGCTGCTGTCTAG	ACT+G+G+TA+C+GC	ACT+G+T+TA+C+G+CAC
DNMT3A	D530E	2	25467486	G	T	TRUE	GTTTCCGCACATGAGCAC	CTTTCTGGAGTGTGCGTAC	CGT+C+G+TC+GT+CG	CGT+C+T+TC+G+T+CG
DNMT3A	P743T	2	25463266	G	T	TRUE	CCACATTCTCAAAGAGCCAG	TTCTTTGAGTTCTACCGCCT	CG+G+A+CC+A+AGGA	CG+G+C+CC+AAGG
DNMT3A	Y908_F909>F	2	25457158	GCAAAAT	CAA	TRUE	TTGTGTCGCTACCTCAGTTT	GTCATCCGCCACCTCTTC	CA+C+G+CAA+A+ATA+C+TC	CA+C+CAAA+C+T+CC
GNAS	Q296K	20	57429393	C	A	TRUE	CAGATAAGAGAGAGCGAGCA	CATCAGCGGCTCCTTCC	TGC+T+G+CT+T+CC	TGC+T+T+C+TT+C+CT
GNAS	P243S	20	57429234	C	T	TRUE	ACCTCCTTCTAACTTCACGG	GCTGCCAATCTCGAACG	CC+G+G+AGA+T+CT	TCC+G+A+A+GA+T+CTC
GNAS	C619fs	20	57430362	TG	T	TRUE	AGCTCATCGACAAACAACTC	GCATTACCTAGAAGCAGCAG	CGTA+C+A+C+AT+GTA+GC	CGTA+C+A+AT+GT+AG+CC
GNAS	T154fs	20	57415620	CA	C	TRUE	GAGACCGAGCCTGAAGAC	AACTTGAGAGCGTGCAGA	AC+TC+C+A+CCTT+CG	AC+TC+C+CC+T+TCG
GNAS	R201C	20	57484420	C	T	TRUE	TTTGTTTCAGGACCTGCTTC	GTTGACTTTGTCCACCTGG	ACA+C+G+GCAGC	ACA+C+A+GC+A+GC
GNB1	V100fs	1	1735988	GA	G	TRUE	CAAATGTTATCCAGGCCACC	TTCTGTCATTAGGTCCACGC	TC+AT+G+A+CC+C+AG	TCA+T+G+CC+CAGG
IDH2	T376fs	15	90628284	GT	G	TRUE	CTGATGAGGTCTTGGTTCCC	CCATCGCCAGCATCTTTG	AC+G+TG+TC+C+AGG	AC+GT+G+C+CA+GG
JAK2	R487C	9	5069154	C	T	TRUE	ACTTCAGCAGTCTTAAAGATCT	GGGACAGCATTTAGTAAACTG	TGT+T+C+GCT+C+AG	TGT+T+T+GC+T+CA+GA
KRAS	A59E	12	25380282	G	T	TRUE	CTCATGTACTGGTCCCTCAT	GGAAGCAAGTAGTAATTGATGGA	CC+T+G+CTG+T+GT	ACC+T+T+CT+G+T+GTC
KRAS	K117N	12	25378647	T	G	TRUE	TGTCTACTGTTCTAGAAGGCA	AAGGACTCTGAAGATGTACCT	T+CAC+A+T+TT+A+T+TT+C+CT	AT+CAC+A+G+TT+A+TT+T+CC
NRAS	A18T	1	115258730	C	T	TRUE	AGTGGTTCTGGATTAGCTGG	TTGCTGGTGTGAAATGACTG	TCA+GT+G+C+G+CTT	TC+A+GT+G+T+GCT+TT
NRAS	A59D	1	115256535	G	T	TRUE	TCTCTCATGGCACTGTACTC	ACAAGTGGTTATAGATGGTGAA	TCC+A+G+CT+G+T+ATC	TG+T+CC+A+T+CTG+TATC
NRAS	G12S	1	115258748	C	T	TRUE	AGTGGTTCTGGATTAGCTGG	GGTTCTTGCTGGTGTGAAAT	CCA+C+C+TG+CTC	CCA+C+T+TG+C+TCC
NRAS	G12A	1	115258747	C	G	TRUE	AGTGGTTCTGGATTAGCTGG	GGTTCTTGCTGGTGTGAAAT	ACC+A+C+CT+G+CT	ACC+A+G+CT+G+CTC
SF3B1	R625L	2	198267483	C	A	TRUE	GGGCAATAAAGAAGGAATGC	GCTGGTCTGGCTACTATGAT	TG+TT+A+C+GGA+C+AT	TGTGTT+A+A+GGA+C+A+TAC
SF3B1	P103_F104fs	2	198285254	CAAAT	C	TRUE	GCAATCTTTGGAGGTCTGTG	AGTGGATATTAAGTGAGACATACC	TC+A+G+CAAAT+G+GA+TC	TC+A+G+CG+G+A+TCA
SRSF2	P107H	17	74732923	G	T	TRUE	CGTTTACCTGCGGCTC	GCAAATGGCGCGCTAC	CA+C+C+CCGCAG	CA+C+A+CC+G+CAG
TET2	G898*	4	106157791	G	T	TRUE	AGATCTTCTTCACAGGTGCT	CAGCTTGTTGACCAGACATA	TA+CA+G+G+GA+T+AT	TC+TA+CA+G+T+GA+T+ATA
TET2	R1404*	4	106193748	C	T	TRUE	TACCAGGTATGCACTCTCAC	ATAAAGGCAGAACGTGAAGC	TCT+C+G+ATT+G+T+CT	TT+CT+C+A+AT+T+GT+CT
TET2	Q652*	4	106157053	C	T	TRUE	AAATGAATCAAGGGCAGTCC	GGAGAAGTGCACCTGGT	AC+T+G+GAGA+T+GT	AAC+T+A+G+AGA+T+GTT
TET2	D905_M906>V	4	106157812	GATA	G	TRUE	GGAGCAGAAGTCACAACAAG	ATCAAGTACCTTTGCTGAGC	CCAA+G+ATA+T+G+T+CT	AC+CA+A+GT+GT+C+TG
TET2	Q1553fs	4	106196323	TC	T	TRUE	CAGAAGCAGCCACCACA	GCCGTCTCATGTATGGATTG	CAC+C+C+TC+AG+AC	CAC+C+C+T+AG+ACA
TET2	C1875fs	4	106197290	TG	T	TRUE	TTCTGGATCCTGACATTGGG	GGGTTGTGGCATGCAG	ATT+GA+G+T+GT+G+CAAA	ATT+G+A+GT+T+G+CAAAG
TET2	T1220I	4	106164791	C	T	TRUE	AGAAGCAGCAGTGAAGAGAA	AGAATCACAATCACTGCAGC	CCAC+A+C+CTG+TGA	CC+AC+A+T+CTG+T+GA
TET2	A1241D	4	106164854	C	A	TRUE	GCTGCAGTGATTGTGATTCT	TATTTCCTCAGCGTCTCGG	CTG+G+C+TG+A+C+AA	TCT+G+G+A+TG+A+CAA
TET2	R1161I	4	106162568	G	T	TRUE	AGGTCCTAATGTGGCAGC	GGATAAACGTTAATCTGCCCT	CTATT+A+G+A+GAAA+T+CATGG	CT+A+TT+A+T+A+GAAA+T+C+A+TG
TET2	C1221G	4	106164793	T	G	TRUE	GAAGCAGCAGTGAAGAGAAG	AGACAGCGGGATTCCTTC	CAC+C+T+GT+GA+GG	AC+C+G+GTGA+GG
TET2	L1276R	4	106180799	T	G	TRUE	TTCAGGAGAACTTGCGCC	ATGCTCCATGAACAACCAAA	ATC+C+A+GCC+CC	ATC+C+C+GCCCC
TET2	G1407V	4	106193758	G	T	TRUE	TACCAGGTATGCACTCTCAC	ATCCACGTCAGAGACTTTGT	TTT+G+G+AG+GA+AA+AC	TTT+G+T+AG+GA+AAA+CC
TET2	R1896M	4	106197354	G	T	TRUE	CCCTTTAAAGAATCCCAATAGG	TTTGGCTCATTCATGCTCTT	CC+A+G+GA+T+C+TC	ACC+A+T+GA+T+C+TCC
TP53	A159D	17	7578454	G	T	TRUE	GCTGTGACTGCTTGTAGATG	CCAAGACCTGCCCTGTG	CAT+G+G+CGCGG	CAT+G+T+CGCG+GA
TP53	G245V	17	7577547	C	A	TRUE	CAGTGTGATGATGGTGAGGA	TAGGTTGGCTCTGACTGTAC	CAT+G+C+CGCCC	CAT+G+A+CGC+CCA
TP53	F270S	17	7577129	A	G	TRUE	CGGAGATTCTCTTCCTCTGT	TTCCTATCCTGAGTAGTGGT	CC+TC+A+A+AG+C+T+GT	TC+A+G+AG+C+T+GT
TP53	Y220H	17	7578191	A	G	TRUE	AAACCAGACCTCAGGCG	TTTGCGTGTGGAGTATTTGG	CC+C+T+AT+G+A+GC	CC+C+C+ATG+AGC
TP53	Q165*	17	7578437	G	A	TRUE	CTCACAACCTCCGTCATGT	GCAGCTGTGGGTTGATTC	TGA+C+T+G+CT+TGT	TGTGA+CT+A+C+TT+GTA+GA
TP53	R202C	17	7578245	G	A	TRUE	ACCACCACACTATGTCGAAA	CCTCAGCATCTTATCCGAGT	TT+G+C+GTG+T+GG	TT+G+T+GTG+T+GGA
TP53	E198*	17	7578257	C	A	TRUE	CCAAATACTCCACACGCAAA	GCCTCTGATTCCTCACTGAT	CT+T+C+CA+CT+CG	CCT+T+A+CA+C+T+CG
TP53	P278T	17	7577106	G	T	TRUE	CGGAGATTCTCTTCCTCTGT	TTCCTATCCTGAGTAGTGGT	CCA+G+G+ACAGGC	CCA+G+T+AC+A+GGC
TP53	D281E	17	7577095	G	C	TRUE	CGGAGATTCTCTTCCTCTGT	GGGACGGAACAGCTTTGA	CC+G+G+TC+T+C+TC	CC+G+C+TC+T+CTCC
TP53	D186N	17	7578374	C	T	TRUE	CTGTCGTCTCTCCAGCC	ACATGACGGAGGTTGTGAG	CCA+T+C+GCT+A+T+CT	CCA+T+T+G+CTA+T+CT
TP53	R213*	17	7578212	G	A	TRUE	TTGCAAACCAGACCTCAGG	GAGTGGAAGGAAATTTGCGT	TGT+C+G+AAA+A+GT+GT	TGT+C+A+AAA+A+G+T+GT
TP53	S94*	17	7579406	G	T	TRUE	AAGAAGCCCAGACGGAAAC	CACCAGCAGCTCCTACAC	AGA+T+G+AC+A+GGG	AA+GA+T+T+ACA+G+GG
TP53	C135*	17	7578525	G	T	TRUE	GAATCAACCCACAGCTGC	TCAACTCTGTCTCCTTCCTC	AGTT+G+G+CA+A+AA+CA	CCAG+TT+G+T+CAAAA+CA
TP53	A276V	17	7577111	G	A	TRUE	CGGAGATTCTCTTCCTCTGT	TTCCTATCCTGAGTAGTGGT	AC+A+G+G+CA+CAA	CA+G+A+CA+C+AAA+CA
TP53	R273S	17	7577121	G	T	TRUE	CGGAGATTCTCTTCCTCTGT	TTCCTATCCTGAGTAGTGGT	ACA+C+G+CA+CCT	CA+C+T+CA+C+CTC
TP53	E271V	17	7577126	T	A	TRUE	CGGAGATTCTCTTCCTCTGT	TTCCTATCCTGAGTAGTGGT	CAC+C+T+CA+AA+G+CT	CAC+C+A+CA+AA+G+CT
TP53	L265P	17	7577144	A	G	TRUE	ACAAACACGCACCTCAAAG	ACCTGATTTCCTTACTGCCT	TCC+C+A+GT+A+G+AT	CC+C+G+GTA+G+AT
TP53	Y205F	17	7578235	T	A	TRUE	ACCACCACACTATGTCGAAA	CCTCAGCATCTTATCCGAGT	TC+CAA+A+T+ACT+C+CA	TCCAA+A+A+A+CT+C+CAC
TP53	R196Q	17	7578262	C	T	TRUE	CCAAATACTCCACACGCAAA	GCCTCTGATTCCTCACTGAT	AT+C+C+G+AGTGGA	ATC+C+A+A+GT+G+GA
TP53	C176*	17	7578402	G	T	TRUE	GCTCACCATCGCTATCTGA	CATCTACAAGCAGTCACAGC	CT+G+C+CCCC+AC	CT+G+A+CCC+C+AC
TP53	R202H	17	7578244	C	T	TRUE	ACCACCACACTATGTCGAAA	CCTCAGCATCTTATCCGAGT	CCA+C+A+C+GCA+AA	TC+CA+C+A+T+GCAAA
TP53	H179N	17	7578395	G	T	TRUE	GCTCACCATCGCTATCTGA	CATCTACAAGCAGTCACAGC	CCA+C+C+AT+G+AG	CCA+C+A+AT+G+A+GC
TP53	N288S	17	7577075	T	C	TRUE	TTGCTTACCTCGCTTAGTG	CTTTGAGGTGCGTGTTTGT	AGAG+A+A+T+CT+C+CG	AG+A+G+TCT+C+CG
TP53	S166*	17	7578433	G	T	TRUE	CTCACAACCTCCGTCATGT	GGGTTGATTCCACACCC	TGCTG+T+G+ACTGCT	TGC+TG+T+T+ACTG+CT
TP53	C141*	17	7578507	G	T	TRUE	GAATCAACCCACAGCTGC	CCTCTTCCTACAGTACTCCC	CAG+G+G+CAG+GT	CA+G+G+T+CA+GGT
TP53	G266*	17	7577142	C	A	TRUE	ACAAACACGCACCTCAAAG	ACCTGATTTCCTTACTGCCT	ACT+G+G+GACGGA	ACT+G+T+GA+C+GG
TP53	S185R	17	7578375	G	T	TRUE	CTGTCGTCTCTCCAGCC	ACATGACGGAGGTTGTGAG	CC+AT+C+G+CTA+T+CT	AC+CAT+C+T+CTA+T+CT
TP53	V274D	17	7577117	A	T	TRUE	CGGAGATTCTCTTCCTCTGT	TTCCTATCCTGAGTAGTGGT	CA+CA+A+A+CA+C+GC	CA+CA+A+T+CA+CGCA
TP53	T125K	17	7579313	G	T	TRUE	CAGGCATTGAAGTCTCATGG	CTTCTTGCATTCTGGGACA	TG+AC+C+G+TG+CA	TGA+C+C+T+TG+CAAG
TP53	K164E	17	7578440	T	C	TRUE	CTCACAACCTCCGTCATGT	GCAGCTGTGGGTTGATTC	ACTG+C+T+T+GT+A+GA	TG+C+T+C+GT+A+GA
TP53	R110H	17	7579358	C	T	TRUE	GCAACTGACCGTGCAAG	TGTCATCTTCTGTCCCTTCC	CC+AG+A+C+GGA+A+AC	CC+AG+A+T+G+GA+AAC
TP53	R181P	17	7578388	C	G	TRUE	TGCTCACCATCGCTATCTG	CATCTACAAGCAGTCACAGC	AG+CA+G+C+GC+TC	AGCA+G+G+GC+TC
TP53	E221*	17	7578188	C	A	TRUE	ACTGACAACCACCCTTAACC	TTTGCGTGTGGAGTATTTGG	CCT+A+T+G+AGC+CG	CC+TA+T+T+AG+C+CG
TP53	L111R	17	7579355	A	C	TRUE	GCAACTGACCGTGCAAG	TGTCATCTTCTGTCCCTTCC	CC+C+A+GACG+GA	CC+C+C+GACGGA
TP53	E51*	17	7579536	C	A	TRUE	GCATTCTGGGAGCTTCATCT	GGATGATTTGATGCTGTCCC	CAT+TGT+T+C+AATA+T+CGT	CAT+T+GT+T+A+AATA+T+C+GT
TP53	R267L	17	7577138	C	A	TRUE	ACAAACACGCACCTCAAAG	ACCTGATTTCCTTACTGCCT	TGTT+C+C+G+TCCC	TGTT+C+A+G+TC+CC
TP53	R110L	17	7579358	C	A	TRUE	GCAACTGACCGTGCAAG	TGTCATCTTCTGTCCCTTCC	CCAG+A+C+GG+A+AACC	CCAG+A+A+GG+AA+A+CC
TP53	G199V	17	7578253	C	A	TRUE	ACCACCACACTATGTCGAAA	GCCTCTGATTCCTCACTGAT	TG+GAA+G+G+AAAT+T+TG	TG+GAA+G+T+A+AAT+T+TGC
TP53	P278R	17	7577105	G	C	TRUE	CGGAGATTCTCTTCCTCTGT	GGGACGGAACAGCTTTGA	TC+CC+A+G+GACAG	TC+CC+A+C+GAC+AG
TP53	R290C	17	7577070	G	A	TRUE	CTTGCTTACCTCGCTTAGTG	CTTTGAGGTGCGTGTTTGT	TG+C+G+GA+GA+TT	TG+C+A+GAG+A+TT+CT
TP53	R175S	17	7578407	G	T	TRUE	GCTCACCATCGCTATCTGA	CATCTACAAGCAGTCACAGC	AG+C+G+CC+TC+AC	CAG+C+T+CC+T+CAC
TP53	C182*	17	7578384	G	T	TRUE	CTGTCGTCTCTCCAGCC	CATCTACAAGCAGTCACAGC	CTG+A+G+CA+G+CG	CTG+A+T+CAG+C+GC
STAT3	S614R	17	40475068	G	T	FALSE	Bio-Rad Assay	Bio-Rad Assay	Bio-Rad Assay	Bio-Rad Assay
TP53	R283C	17	7577091	G	A	FALSE	Bio-Rad Assay	Bio-Rad Assay	Bio-Rad Assay	Bio-Rad Assay
NF1	D1651N	17	29653016	G	A	TRUE	TCTCTCTAAGTGGTTTGTTGT	CTGACCCAGGAGTTACAGTT	CT+TA+C+G+AC+AA+CG	TGC+T+TA+C+A+ACA+ACG
NF1	L2398fs	17	29676202	TC	T	TRUE	CCTTCACCTGCTATTGTTGC	CTAAGTAGGCCACGCTCTG	ACTAA+C+T+C+TG+G+TT	ACTA+A+C+TT+G+GTTAA+CA
NF1	R765fs	17	29554276	GC	G	TRUE	TTGCTGTTGTATTTGCTTAGG	GCATACCTCAGTGTTTCCTG	ATG+C+G+CC+T+CA	AA+T+G+C+CCT+CA
NF1	A1470_V1471fs	17	29587428	CAGTA	C	TRUE	TGATATAGCATCTGATTGTCCT	AGACGATGTAAAGCAAGCAC	TGA+T+G CA+G+TA A+AT+CA	AGT+GA+T+GCAA+T+C+ATA
WT1	R352*	11	32417947	G	A	TRUE	GCGTTTCTCACTGGTCTCA	CCTTCCTCTTACTCTCTGCC	TGT+G+C+GA+CGTG	TGT+G+T+GA+C+GTG
WT1	K383_R384>R	11	32417850	CTCT	C	TRUE	ACTTACCAGTGTGCTTCCTG	CTTCATGTGTGCTTACCCAG	AATAT+C+T+CTT+AT+T+G+CA	AATA+T+C+TAT+T+G+CAGC
ASXL1	R1415*	20	31024758	C	T	TRUE	GGATGCCCTTTGTCATGGA	GATGCTGAGTTGGGAGGG	ACC+C+C+GA+GAG	CC+C+T+GA+GA+GC
ASXL1	C1508*	20	31025038	GC	G	TRUE	TCCTTGCAAATGTTCACTGA	GTCCAATACAGTCATCGTGA	CG+T+G+CAGC+CT	CG+T+GA+G+CC+TG
ASXL1	D1495fs	20	31024999	AC	A	TRUE	CAAACTTTGGTGCGAGCC	GAGATGCTTTCCACCGTG	CA+CT+G+A+CA+G+CA	CA+CT+G+AA+GC+A+CG
ASXL1	V393_R394fs	20	31021177	AGTGC	A	TRUE	AGGAGGAGGCTGAAATCAAA	AAATGCCCATCTCGCTGT	AGAAT+C+A+GT+G+C+GTATA	AGA+AT+C+A+GTATA+CA+GC
ASXL1	L696fs	20	31022603	A	GC	TRUE	GTACGTCAGATCTACAGCGA	CTCCTAGCTCTGGACATGG	CA+AC+T+A+CT+G+CCG	CAA+C+TGC+C+T+GC
DNMT3A	L344P	2	25470011	A	G	TRUE	TACATGGGCTGCTTGTTGTA	TGCAAGTGTAAGCCTCGG	CAT+C+A+G+CT+T+CT	AT+C+G+GCT+T+CT
DNMT3A	G543C	2	25467449	C	A	TRUE	TTGTTGTTTCCGCACATGAG	GGAGTGTGCGTACCAGTAC	CGG+C+C+CCCAC	CGG+C+A+CCC+AC
DNMT3A	R736C	2	25463287	G	A	TRUE	CGATCATCTCCCTCCTTGG	TTTCTCTTCCGACCTCTCAG	TA+C+C+GCC+TCC	TA+C+T+GC+CT+CC
DNMT3A	V480_V483fs	2	25468915	ACCTCGTACAC	A	TRUE	GGCAACAAACTTACCCTCAA	TGACGCCAGCTCTCCT	AC+C+T+CG+T+AC+AC	CCG+C+AC+A+GCC
DNMT3A	V877fs	2	25457257	AC	A	TRUE	GTCTCTGCCTCGCCAAG	CTCACCCTGCCCTCTCT	TGG+AG+A+C+GT+CAG	TG+G+AG+AGT+C+AG
DNMT3A	S393_D394fs	2	25469587	TCA	T	TRUE	TCAATCATGGGCTTGTTCTG	GAAGCTGTTCCCGGTGT	AG+T+GT+C+A+CTC+TC	CAG+T+GT+C+TC+T+CA
DNMT3A	N403fs	2	25469558	TG	T	TRUE	CCAGGGCCCATTCAATCAT	GACAGCGATGAGAGTGACA	AG+A+A+C+AA+GC+CC	CA+G+A+AAA+G+C+CC
DNMT3A	R771L	2	25463181	C	A	TRUE	CATTAGTGAGCTGGCCAAAC	CTGGCTCTTTGAGAATGTGG	AA+T+C+GC+GA+G+AT	AA+T+A+GC+G+A+GATG
DNMT3A	L566W	2	25467178	A	C	TRUE	ACATGTAGCAGTTCCAGGG	TCACTGGGTCTCCTTCCA	CC+AC+C+A+AGA+GGT	CAC+C+C+AG+AGG
DNMT3A	A575T	2	25467152	C	T	TRUE	GCACATGTAGCAGTTCCAG	GGAGTGTGTGGACCTCTTG	ATG+G+C+TGC+CTG	ATG+G+T+TG+C+CT
DNMT3A	G843C	2	25458646	C	A	TRUE	AGTGCACCATAAGATGTCCT	TCAGCAAAGTGAGGACCATT	AGCA+G+G+GC+AA	AGCA+G+G+GC+AA
DNMT3A	Y735*	2	25463288	G	T	TRUE	CGATCATCTCCCTCCTTGG	TTTCTCTTCCGACCTCTCAG	TCT+A+C+CGC+C+TC	TC+T+A+A+CG+C+CT
DNMT3A	G332R	2	25470480	C	T	TRUE	CCCACAACTTACCACTGAGA	TTGTGTCTTGGTGGATGAC	CT+C+C+GA+AC+CA	CT+C+T+GA+A+C+CA
DNMT3A	N838D	2	25458661	T	C	TRUE	TGGTCTTTGCCCTGCTTTA	TCTCCTCTTCATCTAGTTCAGC	AG+T+T+T+GA+C+CTC	AG+T+C+TGA+C+CTC
DNMT3A	D702E	2	25463576	A	T	TRUE	ATGGAGAGGTCATTGCAGG	TGCCTTTATCCTCCCAGATC	CCA+G+A+TC+G+AAT+GG	AC+CA+G+T+T+CG+AATG
DNMT3A	A525V	2	25467502	G	A	TRUE	AGTAGGACTGGTAGCCGT	CTTCCCGCTGCTGTCTAG	TGT+G+C+G+TAC+CA	TGT+G+T+GT+A+C+CA
DNMT3A	A910V	2	25457158	G	A	TRUE	TTGTGTCGCTACCTCAGTTT	GTCATCCGCCACCTCTTC	CA+C+G+CAA+A+ATA+C+TC	CA+C+CAAA+C+T+CC
GNAS	R201H	20	57484421	G	A	TRUE	TTTGTTTCAGGACCTGCTTC	GTTGACTTTGTCCACCTGG	TGC+C+G+TGT+CC	TGC+C+T+TG+T+CCT
GNAS	Q227H	20	57484597	G	T	TRUE	AATAACCAGCTGTCCTCCTC	TTGAAGCACTGGATCCACTT	CC+A+G+CGC+G+AT	CC+A+T+CG+C+G+AT
GNAS	N5fs	20	57428334	AC	A	TRUE	TTTGAGAGGCCGCCAC	GGATATCGCGTTGTCCTGA	CG+C+AAC+TGC+CT	CG+CA+AT+G+C+CT
GNB1	D333fs	1	1718793	TA	T	TRUE	TGGCGTTAGTTCCAGATCTT	TGACTGACGATGGCATGG	AA+GC+T+A+TCC+C+AG	AA+GCT+T+CC+C+AG
JAK2	R228Q	9	5054631	G	A	TRUE	TCGAGCAAAGATCCAAGACT	CATTGGCTGAATTGCTGAA	AG+C+G+AA+TA+A+GG	AAG+C+A+AA+T+AA+G+GT
JAK2	G571S	9	5072561	G	A	TRUE	AGGCGTACGAAGAGAAGTAG	TCTGTGTGCTTTATCCAGAAC	TA+C+G+GT+CAA+CT	TA+C+A+GT+C+AA+CTG
KRAS	Q61K	12	25380277	G	T	TRUE	TACACAAAGAAAGCCCTCCC	TCTCTTGGATATTCTCGACACA	TCT+T+G+AC+CT+GC	TCT+T+T+AC+C+T+GCT
KRAS	Q61E	12	25380277	G	C	TRUE	TACACAAAGAAAGCCCTCCC	TCTCTTGGATATTCTCGACACA	TCT+T+G+AC+CT+GC	TCT+T+C+ACC+T+GC
NRAS	Q61R	1	115256529	T	C	TRUE	TTCGCCTGTCCTCATGTATT	ACAAGTGGTTATAGATGGTGAA	CT+TC+T+T+GT+C+CAG	CTTC+T+C+GTC+C+AG
NRAS	G12D	1	115258747	C	T	TRUE	AGTGGTTCTGGATTAGCTGG	GGTTCTTGCTGGTGTGAAAT	CACC+A+C+CTG+CT	CA+CC+A+T+CT+G+CT
TET2	I1873T	4	106197285	T	C	TRUE	TTCTGGATCCTGACATTGGG	GGGTTGTGGCATGCAG	TCT+C+A+T+TGAG+T+GTG	TCT+C+A+C+TGA+G+TG
TET2	R1262W	4	106164916	C	T	TRUE	GCTGACAAACTCTACTCGGA	TGGGCTTCACTTACTCTTCA	AATCG+C+C+GGTG	TCG+C+T+GG+TGT
TET2	S1898F	4	106197360	C	T	TRUE	CCCTTTAAAGAATCCCAATAGG	TTTGGCTCATTCATGCTCTT	AG+G+G+AG+AT+CC	AG+G+A+AG+AT+C+CT
TET2	R1261H	4	106164914	G	A	TRUE	GCTGACAAACTCTACTCGGA	TGGGCTTCACTTACTCTTCA	CG+G+C+GATT+GGT	CG+G+T+GAT+T+GG
TET2	H1904R	4	106197378	A	G	TRUE	CCCTTTAAAGAATCCCAATAGG	CAAAGAGCCAAGCCATGTT	CTC+TT+A+T+GC+T+GGT	CT+CTT+A+C+GCT+GGT
TET2	Q916*	4	106157845	C	T	TRUE	TATGTCTGGTCAACAAGCTG	CTGGTCAGGCACAGGAAA	TGC+T+C+AG+CA+AAG	TG+C+T+T+AG+C+AAAG
TET2	V1180fs	4	106164029	TC	T	TRUE	TTGGACAGAAGGGTAAAGCT	TCACACTTACCCACTTAGCA	TGAAA+GA+G+T+CAT+CTAT+ACT	TGAAA+G+A+GTAT+C+TATA+CT
TET2	A277_Q278fs	4	106155929	CACAG	C	TRUE	TGAGTTGTCCTGTGAGATCA	GGAGGCAGCTCAGAGTTAG	CCGC+ACAG+AC+C+TC	CC+G+CAC+C+T+CT
TET2	R369fs	4	106156204	C	CAT	TRUE	AATTCTGTTCAGGTTCCAGC	GAAGTAAGCACCATTCATTTCA	CT+CT+G+AA+C+GGT+AT	CT+CT+GAA+CAT+G+GT+AT
TET2	L1832fs	4	106197162	TA	T	TRUE	AGTGATGCTAATGGTCAGGA	CTGACCAGACCTCATCGTT	TG+GCAC+T+AGTC+CA	TG+GCAC+T+GTC+CA
TET2	Q632_N639fs	4	106156994	AAATGTACCAAGTTGAAATGAAT	A	TRUE	CAAGGCAAGCTTACACCCA	TCCACTGTACCTTGGGACT	TGTA+C+C+AA+GTT+G+AA	AG+TC+ACA+C+AA+GGG
TET2	Y1245*	4	106164867	C	A	TRUE	TGTGATTCTCATCCTGGTGT	TATTTCCTCAGCGTCTCGG	CT+A+C+TC+G+GA+GC	CTCT+A+A+T+CG+G+AGC
TET2	Q232fs	4	106155794	AA	T	TRUE	ACATGGTGAACTCCTGGAAA	TGGCATTTATGTGAGATGTGG	ACT+GT+C+T+CAAATATTA+T+CC	ACT+GT+C+T+CTATATTA+T+CC
TP53	H214R	17	7578208	T	C	TRUE	TTGCAAACCAGACCTCAGG	GAGTGGAAGGAAATTTGCGT	ACA+CT+A+T+GT+C+GAA	CA+CT+A+C+GT+C+GAA
TP53	D281Y	17	7577097	C	A	TRUE	CGGAGATTCTCTTCCTCTGT	GGGACGGAACAGCTTTGA	CGG+T+C+TCTC+CC	CGG+T+A+TCT+C+CC
TP53	F113V	17	7579350	A	C	TRUE	GCAACTGACCGTGCAAG	TGTCATCTTCTGTCCCTTCC	CAAG+A+A+GC+C+CA	CA+AG+A+C+GC+CC
TP53	V216M	17	7578203	C	T	TRUE	TTGCAAACCAGACCTCAGG	GAGTGGAAGGAAATTTGCGT	TAG+T+G+TGG+T+GG	TAG+T+A+TG+G+T+GGT
TP53	D281H	17	7577097	C	G	TRUE	CGGAGATTCTCTTCCTCTGT	GGGACGGAACAGCTTTGA	CC+GG+T+C+TC+TCC	CCGG+T+G+TC+TCC
TP53	H193N	17	7578272	G	T	TRUE	ACGCAAATTTCCTTCCACTC	GCCTCTGATTCCTCACTGAT	AGA+T+G+CT+G+AGG	AGA+T+T+CT+GA+G+GA
TP53	T170M	17	7578421	G	A	TRUE	GCTCACCATCGCTATCTGA	CATCTACAAGCAGTCACAGC	TG+A+C+GG+A+GGT	TG+A+T+GG+A+G+GT
TP53	G279E	17	7577102	C	T	TRUE	CGGAGATTCTCTTCCTCTGT	GGGACGGAACAGCTTTGA	CT+G+G+GA+GA+GA	CCT+G+A+G+AG+AGA
GNAS	R201L	20	57484421	G	T	FALSE	Bio-Rad Assay	Bio-Rad Assay	Bio-Rad Assay	Bio-Rad Assay
BCOR	S214*	X	39933958	G	T	TRUE	CTGTAGGACTGCTGAGGTAG	CATCTACCCTTTCCTCGACT	CA+G+T+G+AA+T+A+CT	TT+C+AG+T+T+AA+T+A+CT
NF1	R1241*	17	29562641	C	T	TRUE	TGGGATTGTTTGCACTAACC	AACATGTTCCAGAGCAGTTG	AGC+T+C+GA+G+T+TC	AGC+T+T+GA+GT+T+CT
NF1	R1306Q	17	29562982	G	A	TRUE	ATTCGTGCATTTCTGTAGGT	AACATGTTGCCAATCAGAGG	TTA+C+G+A+AT+T+GT+GA	TTA+C+A+AAT+T+G+T+GATC
NF1	R652fs	17	29552220	AC	A	TRUE	GGATGTGATATTCCTTCTAGTGG	CCTTCCGGAGAGAGGCT	TA+CT+A+C+GTA+CT+CC	TA+C+T+AGTA+C+TC+CT
